# Supplementary material
Source: publisher figshare collection journal article supplement (https://springernature.figshare.com/ndownloader/files/13193111)
Supplement: Supplementary file 1 [file 13193111]

## Sheet: basefinal_PANEL_1979_2008
COD250	time	COD250	X_COORD	Y_COORD	HECTARES	time	year_agrarian	year_population	ANNUAL_NFIRE	FIRES_ACUM5Y	NFIRE_LT10HA	NFIRE_10_100	FIRE_GT100	ANNUAL_BURNAREA	BURN_ACUM5Y	DENPOB_interp	unemployee	primary	secundary	building	aparc_interp	DEXPLO_interp	LEASI_interp	OTHER_interp	PGT50HA_interp	PGT55Y_interp	PL5H_interp	PROPER_interp	PFULL_interp	PILLIT_interp	DELIVES_interp	DMACHI_interp	AGROFO_interp	ARTIFUSO_interp	CONIFER_interp	CROPTRE_interp	DECIDU_interp	LABOUR_interp	MIXED_interp	PASTO_interp	SHRUB_interp	TRANSIT_interp	WAI_interp	WGI_interp	WUI_interp	AFFH_interp	INTENSIF_interp	ARTIFCAMB_interp	DENH_interp
330603	1979	330603	201277	4.55823e+06	10011.6	1979	1972	1981	0	0	0	0	0	0	0	3.49079	0.043062	72.2355	6.10724	0.295591	0.14	2.94353	32.5272	1.43595	20.9033	59.5116	12.1174	65.4438	55.9169	25.9411	38.2666	59.245	52.8509	0.160048	0	0	4.07122	15.0195	0	8.10243	17.0101	2.77083	7.01751	20.0483	0.233	0.195058	24.0572	0.105031	0.43513
330603	1980	330603	201277	4.55823e+06	10011.6	1980	1982	1981	0	0	0	0	0	0	0	3.32256	0.043062	72.2355	6.10724	0.295591	0.093	2.8591	35.4012	1.48059	22.526	60.6639	12.0931	62.6757	55.9169	25.9411	38.2666	59.245	51.2682	0.165764	0	0	4.47706	15.4032	0	8.13101	17.3752	3.16666	7.3191	19.8228	0.237	0.222924	22.1495	0.10003	0.497292
330603	1981	330603	201277	4.55823e+06	10011.6	1981	1982	1981	0	0	0	0	0	0	0	3.25178	0.0734389	70.3989	6.19286	1.76378	0.047	2.77466	38.2752	1.52523	24.1487	61.8161	12.0687	59.9077	55.9169	25.9411	38.2666	59.245	49.6856	0.17148	0	0	4.88289	15.7869	0	8.15959	17.7403	3.5625	7.62068	19.5973	0.241	0.250789	20.2418	0.0950285	0.559454
330603	1982	330603	201277	4.55823e+06	10011.6	1982	1982	1981	0	0	0	0	0	0	0	3.181	0.103816	68.5623	6.27848	3.23197	0	2.69023	41.1492	1.56988	25.7715	62.9684	12.0444	57.1396	55.9169	25.9411	38.2666	59.245	48.103	0.177196	0	0	5.28873	16.1706	0	8.18817	18.1054	3.95833	7.92227	19.3718	0.245	0.278655	18.3341	0.090027	0.621615
330603	1983	330603	201277	4.55823e+06	10011.6	1983	1982	1981	0	0	0	0	0	0	0	3.11022	0.134193	66.7257	6.36411	4.70017	0.05	2.62711	39.5291	1.6774	27.3269	61.6619	11.9091	58.391	55.2856	36.4578	37.4044	51.1103	46.5204	0.182912	0	0	5.69457	16.5543	0	8.21675	18.4705	4.35416	8.22385	19.1463	0.248	0.30652	16.4264	0.0850255	0.683777
330603	1984	330603	201277	4.55823e+06	10011.6	1984	1982	1981	0	0	0	0	0	0	0	3.03944	0.16457	64.8891	6.44973	6.16836	0.099548	2.564	37.9091	1.78492	28.8824	60.3555	11.7738	59.6424	54.6543	46.9744	36.5421	42.9756	44.9378	0.188628	0	0	6.1004	16.9379	0	8.24533	18.8357	4.75	8.52543	18.9208	0.252	0.334386	14.5186	0.080024	0.745938
330603	1985	330603	201277	4.55823e+06	10011.6	1985	1982	1981	0	0	0	0	0	0	0	2.96867	0.194946	63.0525	6.53536	7.63655	0.149322	2.50089	36.2891	1.89245	30.4378	59.0491	11.6385	60.8938	54.023	57.4911	35.6799	34.8409	43.3551	0.194344	0	0	6.50624	17.3216	0	8.27391	19.2008	5.14583	8.82702	18.6953	0.256	0.362252	12.6109	0.0750225	0.808099
330603	1986	330603	201277	4.55823e+06	10011.6	1986	1989	1991	0	0	0	0	0	0	0	2.89789	0.225323	61.2159	6.62098	9.10474	0.199096	2.43778	34.6691	1.99997	31.9933	57.7426	11.5032	62.1452	53.3917	68.0077	34.8177	26.7062	41.7725	0.20006	0	0	6.91207	17.7053	0	8.30249	19.5659	5.54166	9.1286	18.4698	0.26	0.390117	10.7032	0.070021	0.870261
330603	1987	330603	201277	4.55823e+06	10011.6	1987	1989	1991	0	0	0	0	0	0	0	2.82711	0.2557	59.3793	6.7066	10.5729	0.24887	2.37467	33.049	2.1075	33.5487	56.4362	11.3679	63.3966	52.7605	78.5244	33.9554	18.5715	41.3181	0.18577	0	0	8.9977	16.8629	0	8.13387	18.3305	5.23228	9.13086	17.9868	0.258	0.362252	11.287	0.0650195	0.835251
330603	1988	330603	201277	4.55823e+06	10011.6	1988	1989	1991	0	0	0	0	0	0	0	2.75633	0.286077	57.5427	6.79223	12.0411	0.298644	2.31156	31.429	2.21502	35.1042	55.1297	11.2326	64.648	52.1292	89.0411	33.0932	10.4367	40.8637	0.17148	0	0	11.0833	16.0205	0	7.96525	17.0951	4.92291	9.13311	17.5037	0.238	0.334386	11.8707	0.060018	0.80024
330603	1989	330603	201277	4.55823e+06	10011.6	1989	1989	1991	1	0	0	0	1	220	0	2.68556	0.316454	55.7061	6.87785	13.5093	0.348418	2.24845	29.809	2.32254	36.6596	53.8233	11.0974	65.8994	51.4979	99.5577	32.2309	2.30203	40.4093	0.15719	0	0	13.169	15.1781	0	7.79662	15.8598	4.61353	9.13536	17.0207	0.237	0.30652	12.4545	0.0550165	0.76523
330603	1990	330603	201277	4.55823e+06	10011.6	1990	1989	1991	2	1	0	2	0	32.5	220	2.61478	0.346831	53.8695	6.96348	14.9775	0.329809	2.16711	32.3687	2.19756	37.6644	51.7305	10.6743	63.6312	52.7997	96.9508	33.08	2.2085	39.9548	0.1429	0	0	15.2546	14.3357	0	7.628	14.6244	4.30415	9.13761	16.5377	0.235	0.278655	13.0382	0.050015	0.730219
330603	1991	330603	201277	4.55823e+06	10011.6	1991	1989	1991	1	3	0	0	1	125	252.5	2.54227	0.32423	51.5794	10.7766	15.8593	0.3112	2.08577	34.9284	2.07257	38.6693	49.6377	10.2513	61.363	54.1015	94.3439	33.9292	2.11497	39.5004	0.12861	0	0	17.3402	13.4933	0	7.45938	13.389	3.99477	9.13986	16.0546	0.234	0.250789	13.6219	0.0450135	0.695209
330603	1992	330603	201277	4.55823e+06	10011.6	1992	1989	1991	0	4	0	0	0	0	377.5	2.46976	0.301629	49.2893	14.5897	16.7411	0.292591	2.00443	37.4882	1.94758	39.6741	47.5449	9.82831	59.0948	55.4033	91.737	34.7783	2.02143	39.046	0.11432	0	0	19.4258	12.6509	0	7.29076	12.1536	3.68539	9.14211	15.5716	0.233	0.222924	14.2057	0.040012	0.660198
330603	1993	330603	201277	4.55823e+06	10011.6	1993	1989	1991	0	4	0	0	0	0	377.5	2.39725	0.279028	46.9991	18.4029	17.6229	0.273983	1.92309	40.0479	1.82259	40.679	45.4521	9.4053	56.8266	56.7051	89.1301	35.6274	1.9279	38.5916	0.10003	0	0	21.5115	11.8085	0	7.12214	10.9183	3.37601	9.14436	15.0885	0.231	0.195058	14.7894	0.0350105	0.625188
330603	1994	330603	201277	4.55823e+06	10011.6	1994	1989	1991	0	4	0	0	0	0	377.5	2.32474	0.256427	44.709	22.216	18.5047	0.255374	1.84175	42.6076	1.69761	41.6838	43.3593	8.98229	54.5584	58.0069	86.5232	36.4765	1.83437	38.1372	0.08574	0	0	23.5971	10.9661	0	6.95352	9.6829	3.06663	9.14661	14.6055	0.23	0.167193	15.3732	0.030009	0.590177
330603	1995	330603	201277	4.55823e+06	10011.6	1995	1989	1991	0	3	0	0	0	0	157.5	2.25223	0.233825	42.4189	26.0292	19.3865	0.236765	1.76041	45.1674	1.57262	42.6887	41.2665	8.55928	52.2902	59.3087	83.9163	37.3256	1.74083	37.6827	0.07145	0	0	25.6827	10.1238	0	6.78489	8.44753	2.75726	9.14886	14.1225	0.228	0.139327	15.9569	0.0250075	0.555167
330603	1996	330603	201277	4.55823e+06	10011.6	1996	1999	2001	0	1	0	0	0	0	125	2.17972	0.211224	40.1288	29.8423	20.2683	0.218156	1.67906	47.7271	1.44763	43.6935	39.1737	8.13626	50.022	60.6106	81.3094	38.1748	1.6473	37.2283	0.05716	0	0	27.7683	9.28136	0	6.61627	7.21216	2.44788	9.15111	13.6394	0.227	0.111462	16.5407	0.020006	0.520156
330603	1997	330603	201277	4.55823e+06	10011.6	1997	1999	2001	1	0	1	0	0	3	0	2.10721	0.188623	37.8386	33.6554	21.1502	0.199547	1.59772	50.2868	1.32264	44.6984	37.0809	7.71325	47.7538	61.9124	78.7025	39.0239	1.55376	36.7739	0.04287	0	0	29.854	8.43896	0	6.44765	5.97679	2.1385	9.15337	13.1564	0.225	0.0835965	17.1244	0.0150045	0.485146
330603	1998	330603	201277	4.55823e+06	10011.6	1998	1999	2001	0	1	0	0	0	0	3	2.0347	0.166022	35.5485	37.4686	22.032	0.180938	1.51638	52.8465	1.19766	45.7032	34.9881	7.29024	45.4855	63.2142	76.0956	39.873	1.46023	36.3195	0.02858	0	0	31.9396	7.59657	0	6.27903	4.74142	1.82912	9.15562	12.6734	0.224	0.055731	17.7082	0.010003	0.450135
330603	1999	330603	201277	4.55823e+06	10011.6	1999	1999	2001	4	1	1	1	0	17	3	1.96219	0.143421	33.2584	41.2817	22.9138	0.162329	1.43504	55.4063	1.07267	46.708	32.8953	6.86722	43.2173	64.516	73.4887	40.7221	1.3667	35.865	0.01429	0	0	34.0252	6.75417	0	6.11041	3.50605	1.51974	9.15787	12.1903	0.223	0.0278655	18.2919	0.0050015	0.415125
330603	2000	330603	201277	4.55823e+06	10011.6	2000	1999	2001	2	5	0	2	0	56	20	1.88968	0.12082	30.9683	45.0948	23.7956	0.355184	1.37595	55.8747	1.36919	48.9399	33.5649	6.38112	42.2613	64.516	73.4887	41.4925	1.3667	35.4106	0	0	0	36.1108	5.91177	0	5.94178	2.27068	1.21036	9.16012	11.7073	0.24	0	18.8757	0	0.380114
330603	2001	330603	201277	4.55823e+06	10011.6	2001	1999	2001	4	7	0	0	2	558.7	76	1.88968	0.12082	30.9683	45.0948	23.7956	0.548039	1.31685	56.343	1.6657	51.1718	34.2345	5.89501	41.3053	64.516	73.4887	42.2628	1.3667	35.4123	0	0	0	36.1092	5.91344	0	5.94345	2.24401	1.23704	9.16296	11.7106	0.24	0	15.7297	0	0.345102
330603	2002	330603	201277	4.55823e+06	10011.6	2002	1999	2001	0	11	0	0	0	0	634.7	1.88968	0.12082	30.9683	45.0948	23.7956	0.740893	1.25776	56.8114	1.96222	53.4037	34.9041	5.40891	40.3492	64.516	73.4887	43.0332	1.3667	35.414	0	0	0	36.1075	5.91511	0	5.94512	2.21733	1.26371	9.16579	11.7139	0.24	0	12.5838	0	0.31009
330603	2003	330603	201277	4.55823e+06	10011.6	2003	1999	2001	0	10	0	0	0	0	631.7	1.88968	0.12082	30.9683	45.0948	23.7956	0.933748	1.19866	57.2798	2.25874	55.6356	35.5737	4.9228	39.3932	64.516	73.4887	43.8036	1.3667	35.4156	0	0	0	36.1058	5.91678	0	5.94678	2.19066	1.29039	9.16863	11.7173	0.24	0	9.43783	0	0.275079
330603	2004	330603	201277	4.55823e+06	10011.6	2004	1999	2001	0	10	0	0	0	0	631.7	1.88968	0.12082	30.9683	45.0948	23.7956	1.1266	1.13957	57.7482	2.55526	57.8675	36.2433	4.4367	38.4372	64.516	73.4887	44.5739	1.3667	35.4173	0	0	0	36.1042	5.91844	0	5.94845	2.16398	1.31706	9.17147	11.7206	0.24	0	6.29189	0	0.240067
330603	2005	330603	201277	4.55823e+06	10011.6	2005	1999	2001	3	6	1	1	0	32.95	614.7	1.88968	0.12082	30.9683	45.0948	23.7956	1.31946	1.08048	58.2166	2.85177	60.0994	36.9129	3.9506	37.4812	64.516	73.4887	45.3443	1.3667	35.419	0	0	0	36.1025	5.92011	0	5.95012	2.13731	1.34374	9.1743	11.7239	0.24	0	3.14594	0	0.205055
330603	2006	330603	201277	4.55823e+06	10011.6	2006	2009	2001	2	7	1	0	0	2.28	591.65	1.88968	0.12082	30.9683	45.0948	23.7956	1.51231	1.02138	58.6849	3.14829	62.3313	37.5825	3.46449	36.5251	64.516	73.4887	46.1146	1.3667	35.4206	0	0	0	36.1008	5.92178	0	5.95179	2.11063	1.37041	9.17714	11.7273	0.24	0	0	0	0.170043
330603	2007	330603	201277	4.55823e+06	10011.6	2007	2009	2001	1	5	0	0	0	0.05	35.23	1.88968	0.12082	30.9683	45.0948	23.7956	1.70517	0.962288	59.1533	3.44481	64.5632	38.2521	2.97839	35.5691	64.516	73.4887	46.885	1.3667	35.4206	0	0	0	36.1008	5.92178	0	5.95179	2.11063	1.37041	9.17714	11.7273	0.24	0	0	0	0.170043
330603	2008	330603	201277	4.55823e+06	10011.6	2008	2009	2001	2	6	1	0	0	2.13	35.28	1.88968	0.12082	30.9683	45.0948	23.7956	2.09088	0.844099	60.0901	4.03785	69.027	39.5913	2.00618	33.657	64.516	73.4887	48.4257	1.3667	35.4206	0	0	0	36.1008	5.92178	0	5.95179	2.11063	1.37041	9.17714	11.7273	0.24	0	0	0	0.135031
330604	1979	330604	200588	4548249	10012.1	1979	1972	1981	0	0	0	0	0	0	0	3.48633	0.055058	71.2411	3.79996	6.5982	0.09	2.65408	37.0141	1.97151	21.1251	54.1355	12.6156	60.4158	44.1589	17.08	38.0609	43.2682	19.6789	0.115023	0	0	2.77055	39.4329	0	16.9234	20.6291	0.45009	18.9229	16.8588	0.306	0.080016	13.6727	0	0.190038
330604	1980	330604	200588	4548249	10012.1	1980	1982	1981	0	0	0	0	0	0	0	3.32672	0.055058	71.2411	3.79996	6.5982	0.06	2.62209	39.0028	2.13544	21.838	55.4026	13.1113	58.4152	44.1589	17.08	38.0609	43.2682	20.2298	0.127168	0	0	2.85486	37.9819	0	17.5049	20.787	0.514389	18.5769	17.2616	0.322	0.0914469	12.6082	0	0.217186
330604	1981	330604	200588	4548249	10012.1	1981	1982	1981	0	0	0	0	0	0	0	3.26166	0.103533	69.1545	4.37944	7.24405	0.03	2.59011	40.9916	2.29938	22.5509	56.6696	13.607	56.4146	44.1589	17.08	38.0609	43.2682	20.7806	0.139314	0	0	2.93916	36.5309	0	18.0865	20.9449	0.578687	18.2309	17.6645	0.338	0.102878	11.5437	0	0.244335
330604	1982	330604	200588	4548249	10012.1	1982	1982	1981	0	0	0	0	0	0	0	3.1966	0.152009	67.0679	4.95893	7.8899	0	2.55812	42.9803	2.46331	23.2637	57.9367	14.1027	54.4141	44.1589	17.08	38.0609	43.2682	21.3314	0.151459	0	0	3.02346	35.0799	0	18.668	21.1028	0.642986	17.8849	18.0673	0.354	0.114309	10.4792	0	0.271483
330604	1983	330604	200588	4548249	10012.1	1983	1982	1981	0	0	0	0	0	0	0	3.13153	0.200484	64.9814	5.53841	8.53575	0	2.50366	41.6988	2.41974	23.8881	57.092	13.2014	55.607	45.7767	28.9003	37.8285	37.2582	21.8822	0.163604	0	0	3.10776	33.6289	0	19.2496	21.2607	0.707284	17.5389	18.4702	0.37	0.125739	9.41474	0	0.298631
330604	1984	330604	200588	4548249	10012.1	1984	1982	1981	0	0	0	0	0	0	0	3.06647	0.248959	62.8948	6.11789	9.18161	0	2.44921	40.4173	2.37616	24.5125	56.2473	12.3	56.7999	47.3945	40.7207	37.596	31.2482	22.4331	0.175749	0	0	3.19207	32.1779	0	19.8311	21.4186	0.771583	17.193	18.873	0.386	0.13717	8.35024	0	0.325779
330604	1985	330604	200588	4548249	10012.1	1985	1982	1981	0	0	0	0	0	0	0	3.0014	0.297434	60.8083	6.69738	9.82746	0	2.39475	39.1358	2.33259	25.1368	55.4027	11.3987	57.9928	49.0124	52.541	37.3636	25.2382	22.9839	0.187895	0	0	3.27637	30.7269	0	20.4127	21.5765	0.835881	16.847	19.2758	0.402	0.148601	7.28574	0	0.352928
330604	1986	330604	200588	4548249	10012.1	1986	1989	1991	1	0	0	1	0	17	0	2.93634	0.34591	58.7217	7.27686	10.4733	0	2.34029	37.8544	2.28901	25.7612	54.558	10.4973	59.1858	50.6302	64.3614	37.1311	19.2282	23.5347	0.20004	0	0	3.36067	29.2759	0	20.9942	21.7343	0.90018	16.501	19.6787	0.449	0.160032	6.22124	0	0.380076
330604	1987	330604	200588	4548249	10012.1	1987	1989	1991	0	1	0	0	0	0	17	2.87128	0.394385	56.6352	7.85635	11.1192	0	2.28583	36.5729	2.24544	26.3856	53.7133	9.59601	60.3787	52.2481	76.1817	36.8987	13.2181	22.7938	0.185751	0	0	3.14491	28.5471	0	19.6904	21.2092	1.56603	16.7171	18.6972	0.448	0.231475	8.27594	0	0.572257
330604	1988	330604	200588	4548249	10012.1	1988	1989	1991	0	1	0	0	0	0	17	2.80621	0.44286	54.5486	8.43583	11.765	0	2.23137	35.2914	2.20187	27.0099	52.8686	8.69466	61.5716	53.8659	88.0021	36.6662	7.20814	22.053	0.171463	0	0	2.92916	27.8184	0	18.3865	20.6841	2.23187	16.9331	17.7158	0.258	0.302918	10.3306	0	0.764439
330604	1989	330604	200588	4548249	10012.1	1989	1989	1991	0	1	0	0	0	0	17	2.74115	0.491336	52.462	9.01531	12.4109	0	2.17691	34.0099	2.15829	27.6343	52.0239	7.79332	62.7645	55.4837	99.8224	36.4338	1.19813	21.3121	0.157174	0	0	2.7134	27.0897	0	17.0827	20.159	2.89772	17.1491	16.7343	0.257	0.374361	12.3853	0	0.95662
330604	1990	330604	200588	4548249	10012.1	1990	1989	1991	0	1	0	0	0	0	17	2.67608	0.539811	50.3755	9.5948	13.0567	0	2.10185	35.162	2.21788	29.8153	51.3731	7.64434	61.6453	55.9957	97.9662	37.5745	1.1946	20.5713	0.142886	0	0	2.49764	26.361	0	15.7789	19.6339	3.56357	17.3652	15.7528	0.255	0.445803	14.44	0	1.1488
330604	1991	330604	200588	4548249	10012.1	1991	1989	1991	0	1	0	0	0	0	17	2.60749	0.500052	47.5053	13.7946	14.4102	0	2.02679	36.3142	2.27746	31.9964	50.7222	7.49536	60.5261	56.5078	96.1099	38.7152	1.19106	19.8304	0.128597	0	0	2.28188	25.6323	0	14.475	19.1088	4.22942	17.5812	14.7714	0.254	0.517246	16.4947	0	1.34098
330604	1992	330604	200588	4548249	10012.1	1992	1989	1991	0	0	0	0	0	0	0	2.53889	0.460293	44.635	17.9944	15.7637	0	1.95172	37.4663	2.33705	34.1774	50.0714	7.34639	59.4068	57.0198	94.2537	39.856	1.18753	19.0895	0.114309	0	0	2.06613	24.9036	0	13.1712	18.5837	4.89526	17.7972	13.7899	0.253	0.588689	18.5494	0	1.53316
330604	1993	330604	200588	4548249	10012.1	1993	1989	1991	0	0	0	0	0	0	0	2.4703	0.420535	41.7648	22.1943	17.1172	0	1.87666	38.6185	2.39664	36.3584	49.4205	7.19741	58.2876	57.5318	92.3974	40.9967	1.184	18.3487	0.10002	0	0	1.85037	24.1748	0	11.8674	18.0586	5.56111	18.0133	12.8085	0.251	0.660132	20.6041	0	1.72534
330604	1994	330604	200588	4548249	10012.1	1994	1989	1991	1	0	0	0	0	0.5	0	2.4017	0.380776	38.8945	26.3941	18.4707	0	1.8016	39.7706	2.45622	38.5395	48.7697	7.04843	57.1684	58.0438	90.5412	42.1374	1.18047	17.6078	0.0857314	0	0	1.63461	23.4461	0	10.5635	17.5335	6.22696	18.2293	11.827	0.25	0.731575	22.6588	0	1.91753
330604	1995	330604	200588	4548249	10012.1	1995	1989	1991	0	1	0	0	0	0	0.5	2.3331	0.341017	36.0243	30.5939	19.8241	0	1.72654	40.9227	2.51581	40.7205	48.1189	6.89945	56.0492	58.5558	88.685	43.2781	1.17694	16.8669	0.0714429	0	0	1.41886	22.7174	0	9.25971	17.0084	6.89281	18.4453	10.8456	0.248	0.803018	24.7135	0	2.10971
330604	1996	330604	200588	4548249	10012.1	1996	1999	2001	0	1	0	0	0	0	0.5	2.26451	0.301258	33.1541	34.7937	21.1776	0	1.65147	42.0749	2.57539	42.9015	47.468	6.75048	54.9299	59.0678	86.8287	44.4189	1.1734	16.1261	0.0571543	0	0	1.2031	21.9887	0	7.95588	16.4833	7.55865	18.6614	9.86411	0.247	0.874461	26.7682	0	2.30189
330604	1997	330604	200588	4548249	10012.1	1997	1999	2001	0	1	0	0	0	0	0.5	2.19591	0.261499	30.2838	38.9935	22.5311	0	1.57641	43.227	2.63498	45.0826	46.8172	6.6015	53.8107	59.5798	84.9725	45.5596	1.16987	15.3852	0.0428657	0	0	0.98734	21.26	0	6.65204	15.9582	8.2245	18.8774	8.88265	0.245	0.945903	28.8229	0	2.49407
330604	1998	330604	200588	4548249	10012.1	1998	1999	2001	0	1	0	0	0	0	0.5	2.12732	0.221741	27.4136	43.1934	23.8846	0	1.50135	44.3792	2.69457	47.2636	46.1663	6.45252	52.6915	60.0919	83.1162	46.7003	1.16634	14.6444	0.0285771	0	0	0.771583	20.5312	0	5.34821	15.4331	8.89035	19.0934	7.90119	0.244	1.01735	30.8776	0	2.68625
330604	1999	330604	200588	4548249	10012.1	1999	1999	2001	2	1	0	1	0	12.2	0.5	2.05872	0.181982	24.5433	47.3932	25.2381	0	1.42629	45.5313	2.75415	49.4447	45.5155	6.30355	51.5723	60.6039	81.26	47.841	1.16281	13.9035	0.0142886	0	0	0.555825	19.8025	0	4.04438	14.908	9.5562	19.3095	6.91974	0.243	1.08879	32.9323	0	2.87843
330604	2000	330604	200588	4548249	10012.1	2000	1999	2001	1	2	1	0	0	10	12.2	1.99012	0.142223	21.6731	51.593	26.5916	0.259961	1.39534	45.7297	3.28446	49.163	46.4561	6.25767	50.5848	60.6039	81.26	47.6261	1.16281	13.1626	0	0	0	0.340068	19.0738	0	2.74055	14.3829	10.222	19.5255	5.93828	0.26	1.16023	34.987	0	3.07061
330604	2001	330604	200588	4548249	10012.1	2001	1999	2001	3	3	3	0	0	11	22.2	1.99012	0.142223	21.6731	51.593	26.5916	0.519922	1.36439	45.928	3.81477	48.8814	47.3968	6.2118	49.5973	60.6039	81.26	47.4111	1.16281	13.161	0	0	0	0.340068	19.0671	0	2.74221	14.3729	10.227	19.5306	5.93992	0.26	0.96686	29.1592	0	2.55884
330604	2002	330604	200588	4548249	10012.1	2002	1999	2001	4	6	3	0	0	11.05	33.2	1.99012	0.142223	21.6731	51.593	26.5916	0.779883	1.33344	46.1264	4.34508	48.5998	48.3374	6.16593	48.6098	60.6039	81.26	47.1962	1.16281	13.1593	0	0	0	0.340068	19.0605	0	2.74388	14.3629	10.232	19.5356	5.94157	0.26	0.773488	23.3313	0	2.04708
330604	2003	330604	200588	4548249	10012.1	2003	1999	2001	0	10	0	0	0	0	44.25	1.99012	0.142223	21.6731	51.593	26.5916	1.03984	1.30249	46.3248	4.87539	48.3182	49.278	6.12006	47.6224	60.6039	81.26	46.9813	1.16281	13.1576	0	0	0	0.340068	19.0538	0	2.74555	14.3529	10.237	19.5407	5.94321	0.26	0.580116	17.5035	0	1.53531
330604	2004	330604	200588	4548249	10012.1	2004	1999	2001	0	10	0	0	0	0	44.25	1.99012	0.142223	21.6731	51.593	26.5916	1.29981	1.27155	46.5231	5.4057	48.0366	50.2187	6.07418	46.6349	60.6039	81.26	46.7663	1.16281	13.156	0	0	0	0.340068	19.0471	0	2.74722	14.3429	10.242	19.5458	5.94486	0.26	0.386744	11.6757	0	1.02354
330604	2005	330604	200588	4548249	10012.1	2005	1999	2001	4	8	2	0	0	4.93	32.05	1.99012	0.142223	21.6731	51.593	26.5916	1.55977	1.2406	46.7215	5.93601	47.755	51.1593	6.02831	45.6474	60.6039	81.26	46.5514	1.16281	13.1543	0	0	0	0.340068	19.0405	0	2.74888	14.3329	10.247	19.5509	5.9465	0.26	0.193372	5.84784	0	0.511769
330604	2006	330604	200588	4548249	10012.1	2006	2009	2001	3	11	1	0	0	2.7	26.98	1.99012	0.142223	21.6731	51.593	26.5916	1.81973	1.20965	46.9199	6.46632	47.4734	52.0999	5.98244	44.6599	60.6039	81.26	46.3364	1.16281	13.1526	0	0	0	0.340068	19.0338	0	2.75055	14.3229	10.2521	19.556	5.94815	0.26	0	0.0200044	0	0
330604	2007	330604	200588	4548249	10012.1	2007	2009	2001	1	11	0	0	0	0.05	18.68	1.99012	0.142223	21.6731	51.593	26.5916	2.07969	1.1787	47.1182	6.99663	47.1917	53.0406	5.93656	43.6725	60.6039	81.26	46.1215	1.16281	13.1526	0	0	0	0.340068	19.0338	0	2.75055	14.3229	10.2521	19.556	5.94815	0.26	0	0.0200044	0	0
330604	2008	330604	200588	4548249	10012.1	2008	2009	2001	1	8	0	0	0	0.11	7.68	1.99012	0.142223	21.6731	51.593	26.5916	2.59961	1.1168	47.515	8.05725	46.6285	54.9218	5.84482	41.6975	60.6039	81.26	45.6916	1.16281	13.1526	0	0	0	0.340068	19.0338	0	2.75055	14.3229	10.2521	19.556	5.94815	0.26	0	0	0	0
330605	1979	330605	199901	4.53827e+06	10012	1979	1972	1981	0	0	0	0	0	0	0	3.31565	0.141206	70.8911	2.29398	6.19628	0.974	1.77022	49.3769	4.26984	27.2397	58.9905	14.0909	44.6988	44.2859	7.90986	30.0578	25.4786	52.4407	0.305092	0.295088	0	4.68641	16.515	0.150045	16.0248	8.9877	0.480144	5	17.0328	0.016	0.080024	11.8285	0.20006	0.505151
330605	1980	330605	199901	4.53827e+06	10012	1980	1982	1981	0	0	0	0	0	0	0	3.16707	0.141206	70.8911	2.29398	6.19628	0.649	1.76515	52.2349	4.2322	27.8337	59.6115	14.7737	42.3821	44.2859	7.90986	30.0578	25.4786	51.3726	0.311522	0.252933	0	5.11725	15.9019	0.12861	16.9208	9.34709	0.548736	5.13427	17.5838	0.032	0.091456	10.516	0.205776	0.450135
330605	1981	330605	199901	4.53827e+06	10012	1981	1982	1981	0	0	0	0	0	0	0	3.10069	0.161262	68.5213	2.46401	7.44543	0.325	1.76008	55.093	4.19456	28.4278	60.2325	15.4565	40.0654	44.2859	7.90986	30.0578	25.4786	50.3044	0.317953	0.210778	0	5.54809	15.2889	0.107175	17.8168	9.70648	0.617328	5.26854	18.1349	0.048	0.102888	9.20348	0.211492	0.395118
330605	1982	330605	199901	4.53827e+06	10012	1982	1982	1981	0	0	0	0	0	0	0	3.0343	0.181317	66.1515	2.63404	8.69459	0	1.75501	57.951	4.15691	29.0218	60.8535	16.1393	37.7487	44.2859	7.90986	30.0578	25.4786	49.2362	0.324383	0.168622	0	5.97894	14.6758	0.08574	18.7128	10.0659	0.68592	5.40281	18.6859	0.064	0.11432	7.89094	0.217208	0.340102
330605	1983	330605	199901	4.53827e+06	10012	1983	1982	1981	0	0	0	0	0	0	0	2.96792	0.201373	63.7816	2.80407	9.94374	0	1.70283	54.5647	4.01994	29.2008	61.5529	15.8674	41.106	41.6744	20.882	29.3959	21.9283	48.168	0.330813	0.126467	0	6.40978	14.0628	0.064305	19.6087	10.4253	0.754512	5.53709	19.2369	0.08	0.125752	6.5784	0.222924	0.285085
330605	1984	330605	199901	4.53827e+06	10012	1984	1982	1981	0	0	0	0	0	0	0	2.90154	0.221428	61.4118	2.9741	11.1929	0	1.65065	51.1785	3.88297	29.3798	62.2524	15.5954	44.4634	39.0629	33.8541	28.7341	18.378	47.0998	0.337244	0.084311	0	6.84062	13.4497	0.04287	20.5047	10.7847	0.823104	5.67136	19.788	0.096	0.137184	5.26587	0.22864	0.230069
330605	1985	330605	199901	4.53827e+06	10012	1985	1982	1981	0	0	0	0	0	0	0	2.83515	0.241484	59.042	3.14413	12.442	0	1.59847	47.7922	3.746	29.5587	62.9518	15.3235	47.8208	36.4514	46.8261	28.0722	14.8277	46.0317	0.343674	0.0421555	0	7.27147	12.8367	0.021435	21.4007	11.1441	0.891696	5.80563	20.339	0.112	0.148616	3.95333	0.234356	0.175052
330605	1986	330605	199901	4.53827e+06	10012	1986	1989	1991	1	0	0	1	0	30	0	2.76877	0.26154	56.6722	3.31417	13.6912	0	1.54628	44.4059	3.60903	29.7377	63.6513	15.0515	51.1782	33.8399	59.7982	27.4103	11.2774	44.9635	0.350105	0	0	7.70231	12.2237	0	22.2967	11.5035	0.960288	5.9399	20.8901	0.16	0.160048	2.64079	0.240072	0.120036
330605	1987	330605	199901	4.53827e+06	10012	1987	1989	1991	0	1	0	0	0	0	30	2.70238	0.281595	54.3023	3.4842	14.9404	0	1.4941	41.0196	3.47206	29.9167	64.3507	14.7796	54.5356	31.2284	72.7703	26.7485	7.72712	43.6645	0.325097	0	0	7.79019	12.398	0	22.4789	11.2298	1.69051	5.95288	21.4732	0.158	0.203632	3.27527	0.222924	0.240072
330605	1988	330605	199901	4.53827e+06	10012	1988	1989	1991	1	1	0	0	1	315	30	2.636	0.301651	51.9325	3.65423	16.1895	0	1.44192	37.6333	3.33509	30.0956	65.0502	14.5076	57.893	28.6169	85.7424	26.0866	4.17683	42.3656	0.30009	0	0	7.87808	12.5723	0	22.6611	10.9561	2.42073	5.96586	22.0564	0.288	0.247217	3.90974	0.205776	0.360108
330605	1989	330605	199901	4.53827e+06	10012	1989	1989	1991	0	2	0	0	0	0	345	2.56962	0.321706	49.5627	3.82426	17.4387	0	1.38974	34.247	3.19812	30.2746	65.7496	14.2357	61.2503	26.0054	98.7145	25.4247	0.626537	41.0666	0.275083	0	0	7.96596	12.7467	0	22.8433	10.6825	3.15095	5.97883	22.6395	0.287	0.290801	4.54422	0.188628	0.480144
330605	1990	330605	199901	4.53827e+06	10012	1990	1989	1991	1	2	0	1	0	45	345	2.50323	0.341762	47.1928	3.99429	18.6878	0	1.34826	36.5191	3.14622	32.9823	62.6428	13.3986	59.1463	27.7563	96.9561	26.9935	0.617092	39.7676	0.250075	0	0	8.05385	12.921	0	23.0255	10.4088	3.88116	5.99181	23.2227	0.285	0.334386	5.1787	0.17148	0.60018
330605	1991	330605	199901	4.53827e+06	10012	1991	1989	1991	1	3	0	0	0	0.7	390	2.43566	0.318997	43.7865	9.28432	19.8023	0	1.30679	38.7911	3.09433	35.6901	59.536	12.5615	57.0423	29.5072	95.1976	28.5623	0.607646	38.4687	0.225068	0	0	8.14173	13.0954	0	23.2077	10.1352	4.61138	6.00479	23.8058	0.284	0.37797	5.81317	0.154332	0.720216
330605	1992	330605	199901	4.53827e+06	10012	1992	1989	1991	0	3	0	0	0	0	360.7	2.36809	0.296232	40.3802	14.5744	20.9167	0	1.26531	41.0631	3.04243	38.3978	56.4292	11.7245	54.9383	31.2581	93.4391	30.1311	0.598201	37.1697	0.20006	0	0	8.22961	13.2697	0	23.3899	9.86153	5.3416	6.01776	24.389	0.283	0.421555	6.44765	0.137184	0.840252
330605	1993	330605	199901	4.53827e+06	10012	1993	1989	1991	0	3	0	0	0	0	360.7	2.30053	0.273468	36.9739	19.8644	22.0311	0	1.22383	43.3351	2.99054	41.1055	53.3224	10.8874	52.8343	33.009	91.6807	31.6999	0.588755	35.8708	0.175052	0	0	8.3175	13.444	0	23.5721	9.58788	6.07182	6.03074	24.9721	0.281	0.465139	7.08212	0.120036	0.960288
330605	1994	330605	199901	4.53827e+06	10012	1994	1989	1991	1	2	0	0	0	0.5	45.7	2.23296	0.250703	33.5676	25.1544	23.1456	0	1.18236	45.6071	2.93864	43.8132	50.2156	10.0503	50.7303	34.76	89.9222	33.2687	0.57931	34.5718	0.150045	0	0	8.40538	13.6184	0	23.7543	9.31422	6.80204	6.04372	25.5553	0.28	0.508724	7.7166	0.102888	1.08032
330605	1995	330605	199901	4.53827e+06	10012	1995	1989	1991	0	3	0	0	0	0	46.2	2.16539	0.227938	30.1613	30.4445	24.26	0	1.14088	47.8791	2.88675	46.5209	47.1088	9.21327	48.6263	36.5109	88.1637	34.8375	0.569865	33.2728	0.125037	0	0	8.49326	13.7927	0	23.9365	9.04057	7.53226	6.0567	26.1384	0.278	0.552308	8.35108	0.08574	1.20036
330605	1996	330605	199901	4.53827e+06	10012	1996	1999	2001	0	2	0	0	0	0	1.2	2.09782	0.205173	26.755	35.7345	25.3745	0	1.0994	50.1512	2.83485	49.2286	44.0019	8.3762	46.5223	38.2618	86.4053	36.4063	0.560419	31.9739	0.10003	0	0	8.58115	13.967	0	24.1187	8.76692	8.26248	6.06967	26.7216	0.277	0.595893	8.98555	0.068592	1.3204
330605	1997	330605	199901	4.53827e+06	10012	1997	1999	2001	0	1	0	0	0	0	0.5	2.03025	0.182408	23.3487	41.0245	26.4889	0	1.05793	52.4232	2.78296	51.9364	40.8951	7.53914	44.4183	40.0127	84.6468	37.9751	0.550974	30.6749	0.0750225	0	0	8.66903	14.1414	0	24.3009	8.49326	8.9927	6.08265	27.3047	0.275	0.639478	9.62003	0.051444	1.44043
330605	1998	330605	199901	4.53827e+06	10012	1998	1999	2001	0	1	0	0	0	0	0.5	1.96268	0.159644	19.9424	46.3146	27.6033	0	1.01645	54.6952	2.73106	54.6441	37.7883	6.70208	42.3143	41.7636	82.8883	39.5439	0.541528	29.376	0.050015	0	0	8.75691	14.3157	0	24.4831	8.21961	9.72292	6.09563	27.8879	0.274	0.683062	10.2545	0.034296	1.56047
330605	1999	330605	199901	4.53827e+06	10012	1999	1999	2001	0	1	0	0	0	0	0.5	1.89511	0.136879	16.5361	51.6046	28.7178	0	0.974975	56.9672	2.67917	57.3518	34.6815	5.86501	40.2102	43.5146	81.1298	41.1127	0.532083	28.077	0.0250075	0	0	8.8448	14.4901	0	24.6653	7.94596	10.4531	6.1086	28.471	0.273	0.726646	10.889	0.017148	1.6805
330605	2000	330605	199901	4.53827e+06	10012	2000	1999	2001	1	0	1	0	0	2	0	1.82754	0.114114	13.1298	56.8946	29.8322	0.000376654	0.979673	55.5448	3.50492	56.3105	36.7823	6.09539	40.8074	43.5146	81.1298	41.2661	0.532083	26.778	0	0	0	8.93268	14.6644	0	24.8475	7.6723	11.1834	6.12158	29.0542	0.29	0.770231	11.5235	0	1.80054
330605	2001	330605	199901	4.53827e+06	10012	2001	1999	2001	1	1	0	0	0	0.5	2	1.82754	0.114114	13.1298	56.8946	29.8322	0.000753308	0.984371	54.1225	4.33068	55.2692	38.8831	6.32576	41.4045	43.5146	81.1298	41.4196	0.532083	26.7814	0	0	0	8.93268	14.6677	0	24.8475	7.6723	11.1767	6.12384	29.0573	0.29	0.641859	9.60288	0	1.50045
330605	2002	330605	199901	4.53827e+06	10012	2002	1999	2001	1	2	0	0	0	0.05	2.5	1.82754	0.114114	13.1298	56.8946	29.8322	0.00112996	0.989069	52.7001	5.15644	54.2279	40.9839	6.55613	42.0017	43.5146	81.1298	41.573	0.532083	26.7847	0	0	0	8.93268	14.6711	0	24.8475	7.6723	11.17	6.12611	29.0605	0.29	0.513487	7.6823	0	1.20036
330605	2003	330605	199901	4.53827e+06	10012	2003	1999	2001	1	3	1	0	0	2	2.55	1.82754	0.114114	13.1298	56.8946	29.8322	0.00150662	0.993767	51.2777	5.9822	53.1866	43.0846	6.78651	42.5988	43.5146	81.1298	41.7265	0.532083	26.788	0	0	0	8.93268	14.6744	0	24.8475	7.6723	11.1633	6.12837	29.0636	0.29	0.385115	5.76173	0	0.90027
330605	2004	330605	199901	4.53827e+06	10012	2004	1999	2001	2	4	1	0	0	4	4.55	1.82754	0.114114	13.1298	56.8946	29.8322	0.00188327	0.998465	49.8553	6.80796	52.1453	45.1854	7.01688	43.196	43.5146	81.1298	41.8799	0.532083	26.7914	0	0	0	8.93268	14.6777	0	24.8475	7.6723	11.1567	6.13063	29.0668	0.29	0.256744	3.84115	0	0.60018
330605	2005	330605	199901	4.53827e+06	10012	2005	1999	2001	1	6	1	0	0	1.4	8.55	1.82754	0.114114	13.1298	56.8946	29.8322	0.00225992	1.00316	48.433	7.63372	51.104	47.2862	7.24725	43.7931	43.5146	81.1298	42.0334	0.532083	26.7947	0	0	0	8.93268	14.6811	0	24.8475	7.6723	11.15	6.1329	29.0699	0.29	0.128372	1.92058	0	0.30009
330605	2006	330605	199901	4.53827e+06	10012	2006	2009	2001	1	6	0	0	0	0.05	7.95	1.82754	0.114114	13.1298	56.8946	29.8322	0.00263658	1.00786	47.0106	8.45948	50.0627	49.387	7.47763	44.3903	43.5146	81.1298	42.1868	0.532083	26.798	0	0	0	8.93268	14.6844	0	24.8475	7.6723	11.1433	6.13516	29.073	0.29	0	0	0	0
330605	2007	330605	199901	4.53827e+06	10012	2007	2009	2001	1	6	0	0	0	0.84	7.5	1.82754	0.114114	13.1298	56.8946	29.8322	0.00301323	1.01256	45.5882	9.28524	49.0214	51.4878	7.708	44.9874	43.5146	81.1298	42.3403	0.532083	26.798	0	0	0	8.93268	14.6844	0	24.8475	7.6723	11.1433	6.13516	29.073	0.29	0	0	0	0
330605	2008	330605	199901	4.53827e+06	10012	2008	2009	2001	0	6	0	0	0	0	8.29	1.82754	0.114114	13.1298	56.8946	29.8322	0.00376654	1.02195	42.7435	10.9368	46.9388	55.6893	8.16875	46.1817	43.5146	81.1298	42.6472	0.532083	26.798	0	0	0	8.93268	14.6844	0	24.8475	7.6723	11.1433	6.13516	29.073	0.29	0	0	0	0
330606	1979	330606	199215	4528284	10012	1979	1972	1981	0	0	0	0	0	0	0	6.31621	0.088621	70.2214	4.86797	12.9582	0.152	1.3245	48.5312	2.12068	43.1706	52.5505	14.8134	48.7368	21.8351	40.1644	27.1104	21.2938	29.861	0.230046	0	0	3.06561	21.3793	0	35.4421	9.69694	0.325065	6.45026	16.639	0.006	0.040008	15.003	0.10002	0.265053
330606	1980	330606	199215	4528284	10012	1980	1982	1981	0	0	0	0	0	0	0	6.06967	0.088621	70.2214	4.86797	12.9582	0.102	1.30742	49.9851	2.41737	44.4524	52.9742	14.3714	47.1418	21.8351	40.1644	27.1104	21.2938	30.2175	0.222902	0	0	3.33781	20.2155	0	36.1344	9.50047	0.371503	6.54961	17.6292	0.012	0.0457234	13.0526	0.0943046	0.302918
330606	1981	330606	199215	4528284	10012	1981	1982	1981	0	0	0	0	0	0	0	5.89306	0.11139	68.1202	4.72061	13.2753	0.051	1.29035	51.4391	2.71406	45.7342	53.3979	13.9293	45.5468	21.8351	40.1644	27.1104	21.2938	30.574	0.215757	0	0	3.61001	19.0517	0	36.8267	9.304	0.417941	6.64897	18.6195	0.018	0.0514389	11.1022	0.0885891	0.340782
330606	1982	330606	199215	4528284	10012	1982	1982	1981	0	0	0	0	0	0	0	5.71644	0.134158	66.019	4.57324	13.5924	0	1.27327	52.893	3.01075	47.016	53.8216	13.4873	43.9518	21.8351	40.1644	27.1104	21.2938	30.9305	0.208613	0	0	3.8822	17.8879	0	37.5189	9.10754	0.464379	6.74832	19.6097	0.024	0.0571543	9.15183	0.0828737	0.378647
330606	1983	330606	199215	4528284	10012	1983	1982	1981	0	0	0	0	0	0	0	5.53983	0.156926	63.9178	4.42588	13.9095	0	1.2699	49.1696	3.02434	46.4961	55.6445	13.7148	47.4532	24.459	48.5452	27.4668	18.3527	31.287	0.201469	0	0	4.1544	16.7241	0	38.2112	8.91107	0.510816	6.84768	20.5999	0.03	0.0628697	7.20144	0.0771583	0.416512
330606	1984	330606	199215	4528284	10012	1984	1982	1981	0	0	0	0	0	0	0	5.36322	0.179695	61.8166	4.27851	14.2266	0	1.26652	45.4462	3.03792	45.9762	57.4674	13.9424	50.9546	27.0829	56.926	27.8232	15.4115	31.6435	0.194325	0	0	4.4266	15.5603	0	38.9035	8.7146	0.557254	6.94704	21.5902	0.036	0.0685851	5.25105	0.0714429	0.454377
330606	1985	330606	199215	4528284	10012	1985	1982	1981	0	0	0	0	0	0	0	5.18661	0.202463	59.7154	4.13115	14.5437	0	1.26315	41.7228	3.05151	45.4564	59.2903	14.1699	54.456	29.7067	65.3067	28.1796	12.4703	32	0.18718	0	0	4.6988	14.3965	0	39.5958	8.51813	0.603692	7.04639	22.5804	0.042	0.0743006	3.30066	0.0657274	0.492241
330606	1986	330606	199215	4528284	10012	1986	1989	1991	0	0	0	0	0	0	0	5.01	0.225232	57.6142	3.98378	14.8608	0	1.25977	37.9994	3.06509	44.9365	61.1131	14.3974	57.9575	32.3306	73.6875	28.536	9.52913	32.3565	0.180036	0	0	4.97099	13.2326	0	40.2881	8.32166	0.65013	7.14575	23.5707	0.06	0.080016	1.35027	0.060012	0.530106
330606	1987	330606	199215	4528284	10012	1987	1989	1991	0	0	0	0	0	0	0	4.83339	0.248001	55.513	3.83642	15.1779	0	1.2564	34.276	3.07867	44.4167	62.936	14.625	61.4589	34.9544	82.0682	28.8925	6.58795	31.5563	0.167176	0	0	4.76881	13.4813	0	40.198	8.59886	1.16166	7.00899	23.4429	0.059	0.0843026	1.74821	0.0557254	0.545109
330606	1988	330606	199215	4528284	10012	1988	1989	1991	0	0	0	0	0	0	0	4.65678	0.270769	53.4118	3.68905	15.4949	0	1.25302	30.5527	3.09226	43.8968	64.7589	14.8525	64.9603	37.5783	90.449	29.2489	3.64678	30.7562	0.154317	0	0	4.56663	13.7299	0	40.108	8.87606	1.67319	6.87222	23.3152	0	0.0885891	2.14614	0.0514389	0.560112
330606	1989	330606	199215	4528284	10012	1989	1989	1991	2	0	2	0	0	12	0	4.48017	0.293538	51.3106	3.54169	15.812	0	1.24965	26.8293	3.10584	43.3769	66.5818	15.08	68.4618	40.2022	98.8297	29.6053	0.705598	29.956	0.141457	0	0	4.36444	13.9785	0	40.018	9.15326	2.18472	6.73546	23.1874	0	0.0928757	2.54408	0.0471523	0.575115
330606	1990	330606	199215	4528284	10012	1990	1989	1991	1	2	1	0	0	4.5	12	4.30355	0.316306	49.2094	3.39432	16.1291	0	1.20073	30.2	2.8529	45.9894	62.9851	14.0837	65.4899	40.8196	96.0199	32.0766	0.673619	29.1558	0.128597	0	0	4.16226	14.2271	0	39.928	9.43046	2.69625	6.5987	23.0597	0	0.0971623	2.94202	0.0428657	0.590118
330606	1991	330606	199215	4528284	10012	1991	1989	1991	1	3	0	1	0	12	16.5	4.21426	0.294672	48.7005	5.90938	17.2353	0	1.15182	33.5707	2.59997	48.6019	59.3885	13.0874	62.5181	41.437	93.2101	34.5478	0.64164	28.3557	0.115737	0	0	3.96008	14.4758	0	39.838	9.70766	3.20778	6.46194	22.932	0	0.101449	3.33995	0.0385791	0.605121
330606	1992	330606	199215	4528284	10012	1992	1989	1991	0	4	0	0	0	0	28.5	4.12497	0.273038	48.1915	8.42443	18.3415	0	1.1029	36.9413	2.34703	51.2144	55.7918	12.0911	59.5462	42.0544	90.4004	37.0191	0.609661	27.5555	0.102878	0	0	3.75789	14.7244	0	39.748	9.98485	3.71932	6.32518	22.8042	0	0.105735	3.73789	0.0342926	0.620124
330606	1993	330606	199215	4528284	10012	1993	1989	1991	0	4	0	0	0	0	28.5	4.03567	0.251404	47.6826	10.9395	19.4476	0	1.05398	40.312	2.09409	53.8269	52.1951	11.0948	56.5744	42.6718	87.5906	39.4904	0.577682	26.7554	0.090018	0	0	3.55571	14.973	0	39.6579	10.2621	4.23085	6.18842	22.6765	0	0.110022	4.13583	0.030006	0.635127
330606	1994	330606	199215	4528284	10012	1994	1989	1991	0	4	0	0	0	0	28.5	3.94638	0.22977	47.1736	13.4545	20.5538	0	1.00506	43.6827	1.84116	56.4394	48.5984	10.0985	53.6025	43.2893	84.7808	41.9617	0.545703	25.9552	0.0771583	0	0	3.35353	15.2216	0	39.5679	10.5393	4.74238	6.05166	22.5487	0	0.114309	4.53376	0.0257194	0.65013
330606	1995	330606	199215	4528284	10012	1995	1989	1991	1	2	1	0	0	3	16.5	3.85709	0.208136	46.6647	15.9696	21.66	0	0.956148	47.0534	1.58822	59.0519	45.0018	9.10218	50.6307	43.9067	81.971	44.433	0.513724	25.155	0.0642986	0	0	3.15134	15.4702	0	39.4779	10.8164	5.25391	5.91489	22.421	0	0.118595	4.9317	0.0214329	0.665133
330606	1996	330606	199215	4528284	10012	1996	1999	2001	2	2	1	0	0	9	15	3.76779	0.186501	46.1557	18.4846	22.7661	0	0.90723	50.4241	1.33528	61.6644	41.4051	8.10587	47.6588	44.5241	79.1612	46.9042	0.481745	24.3549	0.0514389	0	0	2.94916	15.7189	0	39.3879	11.0936	5.76544	5.77813	22.2932	0	0.122882	5.32964	0.0171463	0.680136
330606	1997	330606	199215	4528284	10012	1997	1999	2001	0	3	0	0	0	0	12	3.6785	0.164867	45.6468	20.9997	23.8723	0	0.858313	53.7948	1.08234	64.2769	37.8084	7.10955	44.687	45.1415	76.3514	49.3755	0.449766	23.5547	0.0385791	0	0	2.74698	15.9675	0	39.2979	11.3708	6.27697	5.64137	22.1655	0	0.127168	5.72757	0.0128597	0.695139
330606	1998	330606	199215	4528284	10012	1998	1999	2001	0	3	0	0	0	0	12	3.58921	0.143233	45.1378	23.5148	24.9785	0	0.809396	57.1655	0.829408	66.8894	34.2118	6.11324	41.7151	45.7589	73.5416	51.8468	0.417787	22.7546	0.0257194	0	0	2.54479	16.2161	0	39.2078	11.648	6.7885	5.50461	22.0378	0	0.131455	6.12551	0.00857314	0.710142
330606	1999	330606	199215	4528284	10012	1999	1999	2001	0	3	0	0	0	0	12	3.49991	0.121599	44.6289	26.0298	26.0846	0	0.760479	60.5362	0.576471	69.5019	30.6151	5.11693	38.7433	46.3764	70.7318	54.3181	0.385808	21.9544	0.0128597	0	0	2.34261	16.4647	0	39.1178	11.9252	7.30003	5.36785	21.91	0	0.135741	6.52345	0.00428657	0.725145
330606	2000	330606	199215	4528284	10012	2000	1999	2001	1	3	1	0	0	2.2	12	3.41062	0.099965	44.1199	28.5449	27.1908	0.25941	0.752938	59.5021	1.46885	69.555	31.7162	5.29733	38.6265	46.3764	70.7318	54.0423	0.385808	21.1542	0	0	0	2.14043	16.7133	0	39.0278	12.2024	7.81156	5.23109	21.7823	0	0.140028	6.92138	0	0.740148
330606	2001	330606	199215	4528284	10012	2001	1999	2001	1	3	1	0	0	4	11.2	3.41062	0.099965	44.1199	28.5449	27.1908	0.51882	0.745397	58.468	2.36122	69.608	32.8173	5.47772	38.5098	46.3764	70.7318	53.7665	0.385808	21.1592	0	0	0	2.14043	16.7133	0	39.0195	12.2058	7.81156	5.23076	21.7731	0	0.11669	5.76782	0	0.61679
330606	2002	330606	199215	4528284	10012	2002	1999	2001	2	2	0	0	0	0.86	6.2	3.41062	0.099965	44.1199	28.5449	27.1908	0.778229	0.737855	57.4339	3.25359	69.6611	33.9184	5.65812	38.3931	46.3764	70.7318	53.4908	0.385808	21.1642	0	0	0	2.14043	16.7133	0	39.0111	12.2091	7.81156	5.23044	21.7639	0	0.093352	4.61426	0	0.493432
330606	2003	330606	199215	4528284	10012	2003	1999	2001	1	4	0	1	0	15.07	7.06	3.41062	0.099965	44.1199	28.5449	27.1908	1.03764	0.730314	56.3998	4.14597	69.7142	35.0195	5.83851	38.2764	46.3764	70.7318	53.215	0.385808	21.1692	0	0	0	2.14043	16.7133	0	39.0028	12.2124	7.81156	5.23011	21.7547	0	0.070014	3.46069	0	0.370074
330606	2004	330606	199215	4528284	10012	2004	1999	2001	0	5	0	0	0	0	22.13	3.41062	0.099965	44.1199	28.5449	27.1908	1.29705	0.722773	55.3658	5.03834	69.7672	36.1206	6.01891	38.1596	46.3764	70.7318	52.9392	0.385808	21.1742	0	0	0	2.14043	16.7133	0	38.9945	12.2158	7.81156	5.22978	21.7455	0	0.046676	2.30713	0	0.246716
330606	2005	330606	199215	4528284	10012	2005	1999	2001	0	5	0	0	0	0	22.13	3.41062	0.099965	44.1199	28.5449	27.1908	1.55646	0.715232	54.3317	5.93072	69.8203	37.2217	6.1993	38.0429	46.3764	70.7318	52.6635	0.385808	21.1792	0	0	0	2.14043	16.7133	0	38.9861	12.2191	7.81156	5.22946	21.7363	0	0.023338	1.15356	0	0.123358
330606	2006	330606	199215	4528284	10012	2006	2009	2001	0	4	0	0	0	0	19.93	3.41062	0.099965	44.1199	28.5449	27.1908	1.81587	0.707691	53.2976	6.82309	69.8734	38.3228	6.3797	37.9262	46.3764	70.7318	52.3877	0.385808	21.1842	0	0	0	2.14043	16.7133	0	38.9778	12.2224	7.81156	5.22913	21.7271	0	0	0	0	0
330606	2007	330606	199215	4528284	10012	2007	2009	2001	0	3	0	0	0	0	15.93	3.41062	0.099965	44.1199	28.5449	27.1908	2.07528	0.700149	52.2635	7.71546	69.9264	39.4239	6.5601	37.8095	46.3764	70.7318	52.1119	0.385808	21.1842	0	0	0	2.14043	16.7133	0	38.9778	12.2224	7.81156	5.22913	21.7271	0	0	0	0	0
330606	2008	330606	199215	4528284	10012	2008	2009	2001	0	1	0	0	0	0	15.07	3.41062	0.099965	44.1199	28.5449	27.1908	2.5941	0.685067	50.1953	9.50021	70.0326	41.6262	6.92089	37.576	46.3764	70.7318	51.5604	0.385808	21.1842	0	0	0	2.14043	16.7133	0	38.9778	12.2224	7.81156	5.22913	21.7271	0	0	0	0	0
330607	1979	330607	198531	4.5183e+06	10011.9	1979	1972	1981	0	0	0	0	0	0	0	5.97651	0.130512	70.8094	7.56096	6.92111	0.678	1.05406	50.3867	3.48748	30.5901	56.4292	16.8166	44.8291	7.11914	19.8143	21.3957	40.2029	76.9454	0	0	0	6.62632	3.5207	0	7.81156	3.79076	1.30526	1.08545	18.0153	0	0	42.4035	0	0.055011
330607	1980	330607	198531	4.5183e+06	10011.9	1980	1982	1981	0	0	0	0	0	0	0	5.68516	0.130512	70.8094	7.56096	6.92111	0.452	1.03919	53.6522	3.95211	30.7086	57.3824	17.9027	41.4828	7.11914	19.8143	21.3957	40.2029	76.2181	0	0	0	7.40434	3.36925	0	7.69725	3.81934	1.49173	1.05355	19.2914	0	0	36.5859	0	0.0628697
330607	1981	330607	198531	4.5183e+06	10011.9	1981	1982	1981	0	0	0	0	0	0	0	5.53501	0.144551	67.8449	7.35434	9.02751	0.226	1.02433	56.9177	4.41674	30.8271	58.3355	18.9888	38.1364	7.11914	19.8143	21.3957	40.2029	75.4908	0	0	0	8.18235	3.21779	0	7.58294	3.84791	1.67819	1.02165	20.5676	0	0	30.7683	0	0.0707284
330607	1982	330607	198531	4.5183e+06	10011.9	1982	1982	1981	0	0	0	0	0	0	0	5.38486	0.158591	64.8804	7.14772	11.1339	0	1.00946	60.1832	4.88136	30.9456	59.2887	20.0749	34.7901	7.11914	19.8143	21.3957	40.2029	74.7635	0	0	0	8.96036	3.06633	0	7.46864	3.87649	1.86466	0.989754	21.8438	0	0	24.9507	0	0.0785871
330607	1983	330607	198531	4.5183e+06	10011.9	1983	1982	1981	0	0	0	0	0	0	0	5.23471	0.17263	61.9159	6.9411	13.2403	0	0.997585	54.0443	4.66642	31.3788	60.9389	20.4833	40.8711	9.55279	30.8131	21.4615	34.5182	74.0362	0	0	0	9.73838	2.91487	0	7.35433	3.90507	2.05112	0.957854	23.1199	0	0	19.1331	0	0.0864459
330607	1984	330607	198531	4.5183e+06	10011.9	1984	1982	1981	0	0	0	0	0	0	0	5.08456	0.18667	58.9514	6.73448	15.3467	0	0.985706	47.9054	4.45148	31.812	62.5891	20.8916	46.952	11.9864	41.8118	21.5273	28.8336	73.3089	0	0	0	10.5164	2.76341	0	7.24002	3.93364	2.23759	0.925954	24.3961	0	0	13.3155	0	0.0943046
330607	1985	330607	198531	4.5183e+06	10011.9	1985	1982	1981	0	0	0	0	0	0	0	4.93441	0.20071	55.9869	6.52786	17.4531	0	0.973826	41.7665	4.23654	32.2453	64.2392	21.3	53.033	14.4201	52.8106	21.5932	23.1489	72.5817	0	0	0	11.2944	2.61195	0	7.12571	3.96222	2.42406	0.894054	25.6722	0	0	7.49793	0	0.102163
330607	1986	330607	198531	4.5183e+06	10011.9	1986	1989	1991	0	0	0	0	0	0	0	4.78426	0.214749	53.0224	6.32124	19.5595	0	0.961947	35.6276	4.0216	32.6785	65.8894	21.7084	59.1139	16.8537	63.8093	21.659	17.4642	71.8544	0	0	0	12.0724	2.46049	0	7.0114	3.9908	2.61052	0.862154	26.9484	0	0	1.68034	0	0.110022
330607	1987	330607	198531	4.5183e+06	10011.9	1987	1989	1991	0	0	0	0	0	0	0	4.63411	0.228789	50.0579	6.11462	21.6659	0	0.950068	29.4887	3.80666	33.1118	67.5396	22.1167	65.1949	19.2874	74.8081	21.7248	11.7796	70.9613	0	0	0	11.7781	2.38048	0	7.18501	4.24299	3.32995	0.909417	26.9082	0	0	2.21973	0	0.167176
330607	1988	330607	198531	4.5183e+06	10011.9	1988	1989	1991	0	0	0	0	0	0	0	4.48396	0.242828	47.0934	5.908	23.7723	0	0.938188	23.3498	3.59172	33.545	69.1897	22.5251	71.2759	21.721	85.8069	21.7906	6.09491	70.0683	0	0	0	11.4837	2.30046	0	7.35861	4.49518	4.04938	0.956681	26.8679	0	0	2.75912	0	0.224331
330607	1989	330607	198531	4.5183e+06	10011.9	1989	1989	1991	0	0	0	0	0	0	0	4.33381	0.256868	44.1289	5.70137	25.8787	0	0.926309	17.2109	3.37678	33.9782	70.8399	22.9334	77.3568	24.1547	96.8056	21.8564	0.410249	69.1753	0	0	0	11.1894	2.22044	0	7.53222	4.74738	4.76881	1.00395	26.8277	0	0	3.29852	0	0.281485
330607	1990	330607	198531	4.5183e+06	10011.9	1990	1989	1991	0	0	0	0	0	0	0	4.18366	0.270907	41.1643	5.49475	27.9851	0	0.900646	19.5276	3.14899	35.3161	69.7121	21.7032	75.459	24.3279	95.9518	23.7629	0.401158	68.2822	0	0	0	10.895	2.14043	0	7.70583	4.99957	5.48824	1.05121	26.7874	0	0	3.83791	0	0.338639
330607	1991	330607	198531	4.5183e+06	10011.9	1991	1989	1991	0	0	0	0	0	0	0	4.10759	0.257254	38.6265	10.9605	27.5782	0	0.874983	21.8442	2.9212	36.6539	68.5844	20.473	73.5613	24.5011	95.0979	25.6693	0.392067	67.3892	0	0	0	10.6007	2.06041	0	7.87943	5.25176	6.20767	1.09847	26.7472	0	0	4.3773	0	0.395793
330607	1992	330607	198531	4.5183e+06	10011.9	1992	1989	1991	0	0	0	0	0	0	0	4.03151	0.243601	36.0886	16.4263	27.1713	0	0.849321	24.1608	2.6934	37.9917	67.4566	19.2428	71.6635	24.6744	94.244	27.5757	0.382976	66.4962	0	0	0	10.3063	1.9804	0	8.05304	5.50396	6.9271	1.14574	26.7069	0	0	4.9167	0	0.452948
330607	1993	330607	198531	4.5183e+06	10011.9	1993	1989	1991	0	0	0	0	0	0	0	3.95543	0.229948	33.5507	21.8921	26.7644	0	0.823658	26.4775	2.46561	39.3295	66.3288	18.0126	69.7657	24.8476	93.3902	29.4822	0.373885	65.6031	0	0	0	10.012	1.90038	0	8.22664	5.75615	7.64653	1.193	26.6667	0	0	5.45609	0	0.510102
330607	1994	330607	198531	4.5183e+06	10011.9	1994	1989	1991	0	0	0	0	0	0	0	3.87935	0.216295	31.0128	27.3579	26.3576	0	0.797996	28.7941	2.23781	40.6673	65.201	16.7824	67.868	25.0209	92.5363	31.3886	0.364793	64.7101	0	0	0	9.71766	1.82036	0	8.40025	6.00834	8.36596	1.24026	26.6264	0	0	5.99548	0	0.567256
330607	1995	330607	198531	4.5183e+06	10011.9	1995	1989	1991	0	0	0	0	0	0	0	3.80327	0.202643	28.475	32.8237	25.9507	0	0.772333	31.1107	2.01002	42.0052	64.0733	15.5522	65.9702	25.1941	91.6824	33.2951	0.355702	63.817	0	0	0	9.42331	1.74035	0	8.57386	6.26054	9.08539	1.28753	26.5862	0	0	6.53488	0	0.624411
330607	1996	330607	198531	4.5183e+06	10011.9	1996	1999	2001	0	0	0	0	0	0	0	3.7272	0.18899	25.9371	38.2895	25.5438	0	0.74667	33.4274	1.78222	43.343	62.9455	14.322	64.0725	25.3673	90.8286	35.2015	0.346611	62.924	0	0	0	9.12897	1.66033	0	8.74746	6.51273	9.80482	1.33479	26.5459	0	0	7.07427	0	0.681565
330607	1997	330607	198531	4.5183e+06	10011.9	1997	1999	2001	0	0	0	0	0	0	0	3.65112	0.175337	23.3992	43.7553	25.137	0	0.721008	35.744	1.55443	44.6808	61.8177	13.0918	62.1747	25.5406	89.9747	37.108	0.33752	62.031	0	0	0	8.83462	1.58032	0	8.92107	6.76492	10.5242	1.38206	26.5057	0	0	7.61367	0	0.738719
330607	1998	330607	198531	4.5183e+06	10011.9	1998	1999	2001	0	0	0	0	0	0	0	3.57504	0.161684	20.8613	49.2211	24.7301	0	0.695345	38.0607	1.32663	46.0186	60.6899	11.8615	60.2769	25.7138	89.1208	39.0144	0.328429	61.1379	0	0	0	8.54028	1.5003	0	9.09468	7.01712	11.2437	1.42932	26.4654	0	0	8.15306	0	0.795873
330607	1999	330607	198531	4.5183e+06	10011.9	1999	1999	2001	0	0	0	0	0	0	0	3.49896	0.148031	18.3234	54.6869	24.3232	0	0.669683	40.3773	1.09884	47.3564	59.5622	10.6313	58.3792	25.8871	88.267	40.9208	0.319338	60.2449	0	0	0	8.24593	1.42028	0	9.26828	7.26931	11.9631	1.47658	26.4252	0	0	8.69245	0	0.853028
330607	2000	330607	198531	4.5183e+06	10011.9	2000	1999	2001	0	0	0	0	0	0	0	3.42288	0.134378	15.7856	60.1527	23.9163	0.281945	0.646979	40.7663	1.89001	50.789	57.4929	9.96179	56.918	25.8871	88.267	41.0858	0.319338	59.3519	0	0	0	7.95159	1.34027	0	9.44189	7.5215	12.6825	1.52385	26.3849	0	0	9.23185	0	0.910182
330607	2001	330607	198531	4.5183e+06	10011.9	2001	1999	2001	0	0	0	0	0	0	0	3.42288	0.134378	15.7856	60.1527	23.9163	0.563891	0.624276	41.1553	2.68118	54.2215	55.4235	9.29225	55.4568	25.8871	88.267	41.2508	0.319338	59.3419	0	0	0	7.94992	1.34194	0	9.44689	7.51817	12.6909	1.5258	26.3858	0	0	7.69321	0	0.758485
330607	2002	330607	198531	4.5183e+06	10011.9	2002	1999	2001	0	0	0	0	0	0	0	3.42288	0.134378	15.7856	60.1527	23.9163	0.845836	0.601573	41.5443	3.47235	57.654	53.3542	8.62271	53.9957	25.8871	88.267	41.4158	0.319338	59.3319	0	0	0	7.94826	1.3436	0	9.45189	7.51484	12.6992	1.52775	26.3866	0	0	6.15456	0	0.606788
330607	2003	330607	198531	4.5183e+06	10011.9	2003	1999	2001	0	0	0	0	0	0	0	3.42288	0.134378	15.7856	60.1527	23.9163	1.12778	0.578869	41.9333	4.26352	61.0866	51.2849	7.95316	52.5345	25.8871	88.267	41.5808	0.319338	59.3219	0	0	0	7.94659	1.34527	0	9.45689	7.5115	12.7075	1.52969	26.3875	0	0	4.61592	0	0.455091
330607	2004	330607	198531	4.5183e+06	10011.9	2004	1999	2001	1	0	0	0	0	0.5	0	3.42288	0.134378	15.7856	60.1527	23.9163	1.40973	0.556166	42.3223	5.05469	64.5191	49.2156	7.28362	51.0733	25.8871	88.267	41.7457	0.319338	59.3119	0	0	0	7.94492	1.34694	0	9.46189	7.50817	12.7159	1.53164	26.3883	0	0	3.07728	0	0.303394
330607	2005	330607	198531	4.5183e+06	10011.9	2005	1999	2001	0	1	0	0	0	0	0.5	3.42288	0.134378	15.7856	60.1527	23.9163	1.69167	0.533463	42.7113	5.84586	67.9516	47.1463	6.61407	49.6122	25.8871	88.267	41.9107	0.319338	59.3019	0	0	0	7.94325	1.3486	0	9.46689	7.50483	12.7242	1.53359	26.3891	0	0	1.53864	0	0.151697
330607	2006	330607	198531	4.5183e+06	10011.9	2006	2009	2001	0	1	0	0	0	0	0.5	3.42288	0.134378	15.7856	60.1527	23.9163	1.97362	0.510759	43.1003	6.63703	71.3842	45.077	5.94453	48.151	25.8871	88.267	42.0757	0.319338	59.2919	0	0	0	7.94159	1.35027	0	9.47189	7.5015	12.7325	1.53554	26.39	0	0	0	0	0
330607	2007	330607	198531	4.5183e+06	10011.9	2007	2009	2001	0	1	0	0	0	0	0.5	3.42288	0.134378	15.7856	60.1527	23.9163	2.25556	0.488056	43.4893	7.4282	74.8167	43.0077	5.27499	46.6898	25.8871	88.267	42.2407	0.319338	59.2919	0	0	0	7.94159	1.35027	0	9.47189	7.5015	12.7325	1.53554	26.39	0	0	0	0	0
330607	2008	330607	198531	4.5183e+06	10011.9	2008	2009	2001	0	1	0	0	0	0	0.5	3.42288	0.134378	15.7856	60.1527	23.9163	2.81945	0.44265	44.2673	9.01055	81.6817	38.8691	3.9359	43.7675	25.8871	88.267	42.5707	0.319338	59.2919	0	0	0	7.94159	1.35027	0	9.47189	7.5015	12.7325	1.53554	26.39	0	0	0	0	0
330608	1979	330608	197847	4508319	10012.4	1979	1972	1981	0	0	0	0	0	0	0	38.5131	0.945471	42.8822	16.3279	6.32401	1.177	1.39929	44.3991	5.39303	27.8644	45.4235	27.5315	48.3979	29.6944	34.1501	25.4343	109.468	38.4527	2.84557	4.05581	0.460092	7.96659	15.053	2.57051	16.8234	7.9966	3.53571	2.51802	16.2275	0.003	5.72614	21.3043	2.80556	2.66053
330608	1980	330608	197847	4508319	10012.4	1980	1982	1981	0	0	0	0	0	0	0	38.8371	0.945471	42.8822	16.3279	6.32401	1.048	1.36294	45.6087	5.75464	28.2262	45.6403	27.9829	47.1181	29.6944	34.1501	25.4343	109.468	38.5363	3.08633	4.06224	0.461521	8.13877	14.3829	2.87772	17.2663	7.79584	3.11777	2.5799	16.9961	0.006	5.01958	18.7452	3.05633	3.04061
330608	1981	330608	197847	4508319	10012.4	1981	1982	1981	0	0	0	0	0	0	0	38.8292	1.04183	41.2213	16.6473	7.62165	0.919	1.3266	46.8183	6.11625	28.588	45.8571	28.4343	45.8383	29.6944	34.1501	25.4343	109.468	38.6199	3.32709	4.06867	0.46295	8.31095	13.7127	3.18492	17.7093	7.59509	2.69983	2.64178	17.7648	0.009	4.31301	16.1861	3.30709	3.42068
330608	1982	330608	197847	4508319	10012.4	1982	1982	1981	0	0	0	0	0	0	0	38.8213	1.13819	39.5604	16.9666	8.91929	0.79	1.29026	48.0278	6.47786	28.9497	46.0738	28.8857	44.5585	29.6944	34.1501	25.4343	109.468	38.7035	3.56786	4.0751	0.464379	8.48312	13.0426	3.49213	18.1522	7.39434	2.28188	2.70365	18.5335	0.012	3.60644	13.627	3.55785	3.80076
330608	1983	330608	197847	4508319	10012.4	1983	1982	1981	0	0	0	0	0	0	0	38.8133	1.23456	37.8995	17.2859	10.2169	0.734	1.27565	43.7003	6.07766	29.5173	47.5531	29.1765	49.1002	28.6348	43.2616	25.5496	93.932	38.787	3.80862	4.08153	0.465807	8.6553	12.3725	3.79933	18.5951	7.19358	1.86394	2.76553	19.3021	0.015	2.89987	11.0679	3.80862	4.18084
330608	1984	330608	197847	4508319	10012.4	1984	1982	1981	0	0	0	0	0	0	0	38.8054	1.33092	36.2386	17.6053	11.5146	0.677848	1.26105	39.3729	5.67747	30.0849	49.0325	29.4673	53.642	27.5753	52.3732	25.665	78.3964	38.8706	4.04938	4.08796	0.467236	8.82748	11.7023	4.10654	19.0381	6.99283	1.446	2.82741	20.0708	0.018	2.1933	8.50884	4.05938	4.56091
330608	1985	330608	197847	4508319	10012.4	1985	1982	1981	1	0	0	0	0	0.1	0	38.7975	1.42728	34.5777	17.9246	12.8122	0.622019	1.24644	35.0454	5.27727	30.6525	50.5118	29.7581	58.1837	26.5157	61.4847	25.7803	62.8608	38.9542	4.29014	4.09439	0.468665	8.99966	11.0322	4.41374	19.481	6.79207	1.02806	2.88929	20.8394	0.021	1.48673	5.94976	4.31015	4.94099
330608	1986	330608	197847	4508319	10012.4	1986	1989	1991	0	1	0	0	0	0	0.1	38.7896	1.52364	32.9168	18.2439	14.1098	0.566189	1.23184	30.7179	4.87708	31.2201	51.9911	30.0489	62.7254	25.4562	70.5962	25.8957	47.3253	39.0378	4.53091	4.10082	0.470094	9.17183	10.3621	4.72094	19.924	6.59132	0.610122	2.95117	21.6081	0.03	0.780156	3.39068	4.56091	5.32106
330608	1987	330608	197847	4508319	10012.4	1987	1989	1991	0	1	0	0	0	0	0.1	38.7816	1.62	31.2559	18.5632	15.4075	0.51036	1.21723	26.3904	4.47688	31.7877	53.4704	30.3398	67.2672	24.3966	79.7078	26.011	31.7897	38.1533	4.53591	4.3673	0.475809	9.81768	10.7457	4.38373	19.4396	6.66348	0.784443	3.41057	21.8337	0.029	0.890178	4.07939	4.30015	4.95028
330608	1988	330608	197847	4508319	10012.4	1988	1989	1991	1	1	0	1	0	55	0.1	38.7737	1.71636	29.595	18.8826	16.7051	0.45453	1.20262	22.0629	4.07668	32.3553	54.9497	30.6306	71.8089	23.3371	88.8193	26.1264	16.2541	37.2689	4.54091	4.63378	0.481525	10.4635	11.1294	4.04652	18.9552	6.73563	0.958763	3.86996	22.0593	0.029	1.0002	4.7681	4.03938	4.57949
330608	1989	330608	197847	4508319	10012.4	1989	1989	1991	1	2	0	1	0	20	55.1	38.7658	1.81273	27.9341	19.2019	18.0028	0.398701	1.18802	17.7355	3.67649	32.9229	56.429	30.9214	76.3506	22.2775	97.9309	26.2417	0.718492	36.3844	4.54591	4.90027	0.48724	11.1094	11.513	3.70931	18.4708	6.80779	1.13308	4.32936	22.2849	0.027	1.11022	5.45681	3.77861	4.2087
330608	1990	330608	197847	4508319	10012.4	1990	1989	1991	0	3	0	0	0	0	75.1	38.7579	1.90909	26.2732	19.5212	19.3004	0.419433	1.17766	19.3952	3.53566	33.2087	56.2256	29.9029	74.9802	22.7886	97.0923	27.74	0.713005	35.5	4.55091	5.16675	0.492956	11.7552	11.8967	3.3721	17.9865	6.87995	1.3074	4.78876	22.5105	0.026	1.22024	6.14551	3.51785	3.83791
330608	1991	330608	197847	4508319	10012.4	1991	1989	1991	0	2	0	0	0	0	75	38.4581	1.87329	25.1422	22.9786	20.4499	0.440166	1.1673	21.0549	3.39484	33.4945	56.0223	28.8844	73.6098	23.2997	96.2538	29.2382	0.707517	34.6155	4.55591	5.43323	0.498671	12.4011	12.2803	3.03489	17.5021	6.9521	1.48172	5.24816	22.7361	0.024	1.33027	6.83422	3.25708	3.46712
330608	1992	330608	197847	4508319	10012.4	1992	1989	1991	0	2	0	0	0	0	75	38.1583	1.83749	24.0113	26.4359	21.5994	0.460898	1.15694	22.7146	3.25402	33.7803	55.8189	27.8659	72.2395	23.8108	95.4152	30.7365	0.70203	33.731	4.56091	5.69971	0.504387	13.0469	12.664	2.69768	17.0177	7.02426	1.65605	5.70756	22.9617	0.023	1.44029	7.52293	2.99631	3.09633
330608	1993	330608	197847	4508319	10012.4	1993	1989	1991	0	2	0	0	0	0	75	37.8585	1.8017	22.8803	29.8932	22.7489	0.481631	1.14658	24.3743	3.11319	34.0661	55.6156	26.8473	70.8691	24.3218	94.5767	32.2347	0.696543	32.8466	4.56591	5.96619	0.510102	13.6927	13.0476	2.36047	16.5333	7.09642	1.83037	6.16695	23.1873	0.021	1.55031	8.21164	2.73555	2.72554
330608	1994	330608	197847	4508319	10012.4	1994	1989	1991	0	1	0	0	0	0	20	37.5587	1.7659	21.7493	33.3506	23.8984	0.502363	1.13622	26.0341	2.97237	34.352	55.4122	25.8288	69.4987	24.8329	93.7381	33.733	0.691056	31.9621	4.57091	6.23267	0.515817	14.3386	13.4313	2.02326	16.0489	7.16858	2.00469	6.62635	23.4129	0.02	1.66033	8.90035	2.47478	2.35476
330608	1995	330608	197847	4508319	10012.4	1995	1989	1991	0	0	0	0	0	0	0	37.259	1.7301	20.6184	36.8079	25.0479	0.523096	1.12586	27.6938	2.83154	34.6378	55.2089	24.8103	68.1283	25.344	92.8996	35.2313	0.685568	31.0776	4.57592	6.49916	0.521533	14.9844	13.8149	1.68605	15.5645	7.24073	2.17901	7.08575	23.6385	0.019	1.77035	9.58906	2.21401	1.98397
330608	1996	330608	197847	4508319	10012.4	1996	1999	2001	0	0	0	0	0	0	0	36.9592	1.69431	19.4874	40.2653	26.1974	0.543828	1.1155	29.3535	2.69072	34.9236	55.0055	23.7918	66.7579	25.855	92.061	36.7295	0.680081	30.1932	4.58092	6.76564	0.527248	15.6303	14.1986	1.34884	15.0802	7.31289	2.35333	7.54515	23.8641	0.017	1.88038	10.2778	1.95325	1.61318
330608	1997	330608	197847	4508319	10012.4	1997	1999	2001	0	0	0	0	0	0	0	36.6594	1.65851	18.3564	43.7226	27.3469	0.564561	1.10514	31.0132	2.54989	35.2094	54.8021	22.7733	65.3875	26.3661	91.2225	38.2278	0.674594	29.3087	4.58592	7.03212	0.532964	16.2761	14.5822	1.01163	14.5958	7.38505	2.52765	8.00455	24.0897	0.016	1.9904	10.9665	1.69248	1.24239
330608	1998	330608	197847	4508319	10012.4	1998	1999	2001	0	0	0	0	0	0	0	36.3596	1.62271	17.2255	47.18	28.4964	0.585293	1.09478	32.6729	2.40907	35.4952	54.5988	21.7548	64.0171	26.8772	90.384	39.7261	0.669106	28.4243	4.59092	7.2986	0.538679	16.922	14.9659	0.674421	14.1114	7.45721	2.70197	8.46394	24.3153	0.014	2.10042	11.6552	1.43171	0.871603
330608	1999	330608	197847	4508319	10012.4	1999	1999	2001	0	0	0	0	0	0	0	36.0598	1.58692	16.0945	50.6373	29.6459	0.606026	1.08442	34.3327	2.26825	35.7811	54.3954	20.7363	62.6468	27.3883	89.5454	41.2243	0.663619	27.5398	4.59592	7.56508	0.544395	17.5678	15.3495	0.33721	13.627	7.52936	2.87629	8.92334	24.5409	0.013	2.21044	12.3439	1.17095	0.500814
330608	2000	330608	197847	4508319	10012.4	2000	1999	2001	0	0	0	0	0	0	0	35.7601	1.55112	14.9636	54.0946	30.7954	1.74062	1.04131	34.9927	2.75068	37.7359	53.4512	19.171	60.3708	27.3883	89.5454	41.0006	0.663619	26.6553	4.60092	7.83157	0.55011	18.2136	15.7331	0	13.1426	7.60152	3.05061	9.38274	24.7665	0.03	2.32046	13.0326	0.910182	0.130026
330608	2001	330608	197847	4508319	10012.4	2001	1999	2001	0	0	0	0	0	0	0	35.7601	1.55112	14.9636	54.0946	30.7954	2.87522	0.998198	35.6526	3.23312	39.6907	52.507	17.6057	58.0949	27.3883	89.5454	40.7768	0.663619	26.6553	4.69927	7.82823	0.55011	18.2403	15.7315	0	13.1376	7.60652	2.92892	9.38353	24.7744	0.03	1.93372	10.8605	0.861344	0.108355
330608	2002	330608	197847	4508319	10012.4	2002	1999	2001	1	0	0	1	0	10.5	0	35.7601	1.55112	14.9636	54.0946	30.7954	4.00981	0.955088	36.3126	3.71555	41.6455	51.5629	16.0404	55.819	27.3883	89.5454	40.5531	0.663619	26.6553	4.79763	7.8249	0.55011	18.267	15.7298	0	13.1326	7.61152	2.80723	9.38433	24.7823	0.03	1.54698	8.6884	0.812506	0.086684
330608	2003	330608	197847	4508319	10012.4	2003	1999	2001	0	1	0	0	0	0	10.5	35.7601	1.55112	14.9636	54.0946	30.7954	5.14441	0.911977	36.9726	4.19799	43.6003	50.6187	14.4751	53.5431	27.3883	89.5454	40.3293	0.663619	26.6553	4.89598	7.82156	0.55011	18.2937	15.7281	0	13.1276	7.61652	2.68554	9.38512	24.7902	0.03	1.16023	6.5163	0.763668	0.065013
330608	2004	330608	197847	4508319	10012.4	2004	1999	2001	0	1	0	0	0	0	10.5	35.7601	1.55112	14.9636	54.0946	30.7954	6.27901	0.868866	37.6326	4.68042	45.5551	49.6745	12.9098	51.2672	27.3883	89.5454	40.1056	0.663619	26.6553	4.99433	7.81823	0.55011	18.3203	15.7265	0	13.1226	7.62152	2.56385	9.38592	24.7981	0.03	0.773488	4.3442	0.71483	0.043342
330608	2005	330608	197847	4508319	10012.4	2005	1999	2001	0	1	0	0	0	0	10.5	35.7601	1.55112	14.9636	54.0946	30.7954	7.4136	0.825755	38.2926	5.16286	47.5099	48.7303	11.3445	48.9913	27.3883	89.5454	39.8818	0.663619	26.6553	5.09269	7.8149	0.55011	18.347	15.7248	0	13.1176	7.62652	2.44216	9.38672	24.806	0.03	0.386744	2.1721	0.665992	0.021671
330608	2006	330608	197847	4508319	10012.4	2006	2009	2001	1	1	0	1	0	20.2	10.5	35.7601	1.55112	14.9636	54.0946	30.7954	8.5482	0.782644	38.9525	5.64529	49.4647	47.7861	9.77919	46.7154	27.3883	89.5454	39.6581	0.663619	26.6553	5.19104	7.81156	0.55011	18.3737	15.7231	0	13.1126	7.63153	2.32046	9.38751	24.8139	0.03	0	0	0.617155	0
330608	2007	330608	197847	4508319	10012.4	2007	2009	2001	1	2	0	0	0	0.05	30.7	35.7601	1.55112	14.9636	54.0946	30.7954	9.6828	0.739534	39.6125	6.12773	51.4195	46.8419	8.21389	44.4395	27.3883	89.5454	39.4343	0.663619	26.6553	5.19104	7.81156	0.55011	18.3737	15.7231	0	13.1126	7.63153	2.32046	9.38751	24.8139	0.03	0	0	0.617155	0
330608	2008	330608	197847	4508319	10012.4	2008	2009	2001	0	2	0	0	0	0	20.25	35.7601	1.55112	14.9636	54.0946	30.7954	11.952	0.653312	40.9325	7.0926	55.3291	44.9535	5.08329	39.8877	27.3883	89.5454	38.9868	0.663619	26.6553	5.19104	7.81156	0.55011	18.3737	15.7231	0	13.1126	7.63153	2.32046	9.38751	24.8139	0.03	0	0	0.568317	0
330609	1979	330609	197165	4498336	10011.9	1979	1972	1981	0	0	0	0	0	0	0	23.8321	1.09245	45.7061	10.1296	7.67924	1.088	1.51485	45.8497	9.03781	30.0529	37.408	28.6924	43.4417	29.4784	29.425	34.7214	115.059	11.8836	2.51575	0	0	6.672	28.7686	0	37.2162	8.47254	3.9862	8.06925	18.9446	0.224	3.47604	8.90767	2.6708	0.0850255
330609	1980	330609	197165	4498336	10011.9	1980	1982	1981	0	0	0	0	0	0	0	23.9707	1.09245	45.7061	10.1296	7.67924	1.029	1.48447	45.857	9.86224	30.6055	36.7503	29.1085	42.8143	29.4784	29.425	34.7214	115.059	12.0136	2.54505	0	0	7.44652	27.5311	0	37.4241	8.01669	4.54994	8.19944	19.5424	0.408	3.97262	7.98954	2.71653	0.097172
330609	1981	330609	197165	4498336	10011.9	1981	1982	1981	2	0	1	0	0	3.1	0	23.951	1.19277	44.1995	10.274	8.22489	0.97	1.45409	45.8643	10.6867	31.1582	36.0926	29.5246	42.1869	29.4784	29.425	34.7214	115.059	12.1436	2.57434	0	0	8.22104	26.2936	0	37.632	7.56084	5.11368	8.32963	20.1403	0.591	4.4692	7.07141	2.76226	0.109318
330609	1982	330609	197165	4498336	10011.9	1982	1982	1981	0	2	0	0	0	0	3.1	23.9312	1.2931	42.693	10.4184	8.77054	0.911	1.42371	45.8715	11.5111	31.7108	35.4349	29.9406	41.5594	29.4784	29.425	34.7214	115.059	12.2737	2.60364	0	0	8.99556	25.0561	0	37.8399	7.10499	5.67742	8.45981	20.7381	0.775	4.96578	6.15327	2.80798	0.121465
330609	1983	330609	197165	4498336	10011.9	1983	1982	1981	3	2	1	1	0	27.5	3.1	23.9114	1.39343	41.1864	10.5628	9.31619	0.845	1.41083	41.9425	10.3427	32.1321	38.2596	30.188	46.5032	28.8836	38.9762	34.8968	98.7356	12.4037	2.63293	0	0	9.77007	23.8186	0	38.0478	6.64914	6.24116	8.59	21.336	0.959	5.46235	5.23514	2.85371	0.133611
330609	1984	330609	197165	4498336	10011.9	1984	1982	1981	0	5	0	0	0	0	30.6	23.8917	1.49375	39.6799	10.7072	9.86184	0.778984	1.39796	38.0135	9.17424	32.5533	41.0843	30.4354	51.4469	28.2888	48.5274	35.0722	82.4123	12.5338	2.66223	0	0	10.5446	22.5811	0	38.2558	6.19329	6.8049	8.72019	21.9338	1.143	5.95893	4.31701	2.89944	0.145758
330609	1985	330609	197165	4498336	10011.9	1985	1982	1981	0	5	0	0	0	0	30.6	23.8719	1.59408	38.1733	10.8516	10.4075	0.713214	1.38509	34.0844	8.00581	32.9746	43.909	30.6828	56.3906	27.694	58.0786	35.2475	66.0889	12.6638	2.69152	0	0	11.3191	21.3435	0	38.4637	5.73744	7.36864	8.85038	22.5317	1.326	6.45551	3.39888	2.94517	0.157905
330609	1986	330609	197165	4498336	10011.9	1986	1989	1991	0	5	0	0	0	0	30.6	23.8522	1.69441	36.6668	10.996	10.9531	0.647444	1.37222	30.1554	6.83739	33.3959	46.7337	30.9302	61.3343	27.0991	67.6298	35.4229	49.7656	12.7938	2.72082	0	0	12.0936	20.106	0	38.6716	5.28158	7.93238	8.98057	23.1296	1.878	6.95209	2.48074	2.9909	0.170051
330609	1987	330609	197165	4498336	10011.9	1987	1989	1991	0	3	0	0	0	0	27.5	23.8324	1.79473	35.1602	11.1404	11.4988	0.581674	1.35935	26.2263	5.66896	33.8171	49.5583	31.1776	66.278	26.5043	77.181	35.5983	33.4423	12.1872	2.65865	0	0	12.2072	20.3297	0	39.1403	5.3266	7.73518	8.94869	22.6984	1.876	6.46194	3.11522	2.77726	0.195773
330609	1988	330609	197165	4498336	10011.9	1988	1989	1991	0	3	0	0	0	0	27.5	23.8126	1.89506	33.6537	11.2848	12.0444	0.515903	1.34648	22.2973	4.50053	34.2384	52.383	31.425	71.2217	25.9095	86.7322	35.7736	17.1189	11.5806	2.59649	0	0	12.3208	20.5533	0	39.609	5.37161	7.53798	8.91681	22.2672	1.457	5.97179	3.7497	2.56363	0.221495
330609	1989	330609	197165	4498336	10011.9	1989	1989	1991	2	0	1	0	0	8	0	23.7929	1.99539	32.1471	11.4292	12.5901	0.450133	1.33361	18.3683	3.3321	34.6596	55.2077	31.6724	76.1654	25.3147	96.2834	35.949	0.795573	10.974	2.53433	0	0	12.4344	20.7769	0	40.0777	5.41662	7.34077	8.88494	21.8361	1.455	5.48164	4.38417	2.34999	0.247217
330609	1990	330609	197165	4498336	10011.9	1990	1989	1991	3	2	3	0	0	11	8	23.7731	2.09571	30.6406	11.5737	13.1357	0.484034	1.3017	19.8345	3.33575	35.5111	54.6492	30.3462	74.8153	27.0419	95.7452	36.7051	0.773317	10.3674	2.47217	0	0	12.548	21.0006	0	40.5464	5.46164	7.14357	8.85306	21.4049	1.454	4.9915	5.01865	2.13636	0.272939
330609	1991	330609	197165	4498336	10011.9	1991	1989	1991	0	5	0	0	0	0	19	23.5325	2.05551	28.9428	15.7587	15.0987	0.517935	1.26979	21.3007	3.33939	36.3627	54.0907	29.0199	73.4652	28.7691	95.2069	37.4612	0.751061	9.76079	2.41001	0	0	12.6617	21.2242	0	41.0152	5.50665	6.94637	8.82119	20.9738	1.453	4.50135	5.65312	1.92272	0.298661
330609	1992	330609	197165	4498336	10011.9	1992	1989	1991	5	5	1	1	0	82	19	23.2919	2.01531	27.2451	19.9437	17.0617	0.551836	1.23787	22.767	3.34304	37.2142	53.5323	27.6936	72.1151	30.4963	94.6687	38.2174	0.728804	9.15417	2.34785	0	0	12.7753	21.4479	0	41.4839	5.55167	6.74917	8.78931	20.5426	1.451	4.0112	6.2876	1.70908	0.324383
330609	1993	330609	197165	4498336	10011.9	1993	1989	1991	2	10	1	0	0	2.5	101	23.0513	1.97511	25.5474	24.1286	19.0247	0.585738	1.20596	24.2332	3.34669	38.0657	52.9738	26.3674	70.7649	32.2235	94.1305	38.9735	0.706548	8.54756	2.28569	0	0	12.8889	21.6715	0	41.9526	5.59668	6.55197	8.75744	20.1115	1.45	3.52106	6.92208	1.49545	0.350105
330609	1994	330609	197165	4498336	10011.9	1994	1989	1991	3	12	0	0	0	0.6	103.5	22.8108	1.93492	23.8496	28.3136	20.9877	0.619639	1.17405	25.6995	3.35033	38.9172	52.4153	25.0411	69.4148	33.9507	93.5923	39.7296	0.684292	7.94095	2.22352	0	0	13.0025	21.8951	0	42.4213	5.64169	6.35476	8.72556	19.6803	1.448	3.03091	7.55655	1.28181	0.375827
330609	1995	330609	197165	4498336	10011.9	1995	1989	1991	1	13	0	1	0	60	96.1	22.5702	1.89472	22.1519	32.4986	22.9507	0.65354	1.14214	27.1657	3.35398	39.7687	51.8568	23.7149	68.0647	35.678	93.0541	40.4857	0.662036	7.33434	2.16136	0	0	13.1161	22.1188	0	42.89	5.68671	6.15756	8.69368	19.2491	1.447	2.54076	8.19103	1.06818	0.401549
330609	1996	330609	197165	4498336	10011.9	1996	1999	2001	1	11	1	0	0	2	145.1	22.3296	1.85452	20.4541	36.6836	24.9138	0.687441	1.11023	28.6319	3.35762	40.6202	51.2983	22.3886	66.7146	37.4052	92.5159	41.2419	0.63978	6.72773	2.0992	0	0	13.2297	22.3424	0	43.3587	5.73172	5.96036	8.66181	18.818	1.445	2.05062	8.8255	0.854542	0.427271
330609	1997	330609	197165	4498336	10011.9	1997	1999	2001	1	12	0	1	0	29	147.1	22.089	1.81432	18.7564	40.8686	26.8768	0.721342	1.07832	30.0982	3.36127	41.4718	50.7398	21.0623	65.3645	39.1324	91.9777	41.998	0.617523	6.12112	2.03704	0	0	13.3433	22.5661	0	43.8274	5.77673	5.76316	8.62993	18.3868	1.444	1.56047	9.45998	0.640907	0.452993
330609	1998	330609	197165	4498336	10011.9	1998	1999	2001	1	8	1	0	0	2	94.1	21.8484	1.77412	17.0586	45.0536	28.8398	0.755243	1.04641	31.5644	3.36492	42.3233	50.1813	19.7361	64.0144	40.8596	91.4395	42.7541	0.595267	5.51451	1.97488	0	0	13.4569	22.7897	0	44.2961	5.82175	5.56596	8.59806	17.9557	1.443	1.07032	10.0945	0.427271	0.478715
330609	1999	330609	197165	4498336	10011.9	1999	1999	2001	2	7	0	0	0	0.55	93.6	21.6078	1.73392	15.3609	49.2386	30.8028	0.789144	1.0145	33.0307	3.36856	43.1748	49.6228	18.4098	62.6642	42.5868	90.9013	43.5102	0.573011	4.9079	1.91272	0	0	13.5705	23.0133	0	44.7649	5.86676	5.36875	8.56618	17.5245	1.441	0.580174	10.7289	0.213636	0.504437
330609	2000	330609	197165	4498336	10011.9	2000	1999	2001	3	6	1	1	0	13.05	93.55	21.3672	1.69372	13.6632	53.4236	32.7658	1.24638	0.989073	33.3407	3.76017	44.694	50.6254	16.7917	61.5066	42.5868	90.9013	43.4153	0.573011	4.30129	1.85055	0	0	13.6841	23.237	0	45.2336	5.91177	5.17155	8.53431	17.0933	1.458	0.090027	11.3634	0	0.530159
330609	2001	330609	197165	4498336	10011.9	2001	1999	2001	2	8	1	0	0	7.1	46.6	21.3672	1.69372	13.6632	53.4236	32.7658	1.70362	0.96365	33.6507	4.15178	46.2133	51.6279	15.1735	60.349	42.5868	90.9013	43.3203	0.573011	4.30963	2.07396	0	0	14.0075	23.1903	0	44.7834	5.83675	5.18822	8.48241	17.004	1.458	0.0750225	9.55294	0.150043	0.463472
330609	2002	330609	197165	4498336	10011.9	2002	1999	2001	1	9	0	0	0	1	51.7	21.3672	1.69372	13.6632	53.4236	32.7658	2.16086	0.938227	33.9607	4.54338	47.7325	52.6305	13.5554	59.1914	42.5868	90.9013	43.2253	0.573011	4.31796	2.29736	0	0	14.331	23.1436	0	44.3333	5.76173	5.20489	8.43052	16.9146	1.458	0.060018	7.74248	0.300087	0.396785
330609	2003	330609	197165	4498336	10011.9	2003	1999	2001	8	9	5	1	0	32.06	23.7	21.3672	1.69372	13.6632	53.4236	32.7658	2.6181	0.912804	34.2707	4.93499	49.2517	53.6331	11.9373	58.0338	42.5868	90.9013	43.1303	0.573011	4.3263	2.52076	0	0	14.6544	23.0969	0	43.8832	5.68671	5.22157	8.37862	16.8252	1.458	0.0450135	5.93201	0.45013	0.330098
330609	2004	330609	197165	4498336	10011.9	2004	1999	2001	12	16	2	1	0	30.85	53.76	21.3672	1.69372	13.6632	53.4236	32.7658	3.07533	0.887381	34.5807	5.3266	50.771	54.6357	10.3191	56.8762	42.5868	90.9013	43.0353	0.573011	4.33463	2.74416	0	0	14.9778	23.0502	0	43.433	5.61168	5.23824	8.32673	16.7358	1.458	0.030009	4.12155	0.600174	0.263411
330609	2005	330609	197165	4498336	10011.9	2005	1999	2001	6	26	0	0	0	1.5	84.06	21.3672	1.69372	13.6632	53.4236	32.7658	3.53257	0.861958	34.8908	5.71821	52.2902	55.6382	8.70102	55.7186	42.5868	90.9013	42.9403	0.573011	4.34297	2.96756	0	0	15.3013	23.0036	0	42.9829	5.53666	5.25491	8.27483	16.6464	1.458	0.0150045	2.31108	0.750217	0.196725
330609	2006	330609	197165	4498336	10011.9	2006	2009	2001	6	29	1	0	0	5.31	72.51	21.3672	1.69372	13.6632	53.4236	32.7658	3.98981	0.836535	35.2008	6.10981	53.8094	56.6408	7.08289	54.561	42.5868	90.9013	42.8453	0.573011	4.3513	3.19096	0	0	15.6247	22.9569	0	42.5328	5.46164	5.27158	8.22294	16.557	0.909	0	0.50062	0.90026	0.130038
330609	2007	330609	197165	4498336	10011.9	2007	2009	2001	5	33	0	0	0	1.21	70.72	21.3672	1.69372	13.6632	53.4236	32.7658	4.44705	0.811112	35.5108	6.50142	55.3287	57.6434	5.46475	53.4034	42.5868	90.9013	42.7503	0.573011	4.3513	3.19096	0	0	15.6247	22.9569	0	42.5328	5.46164	5.27158	8.22294	16.557	0.909	0	0.50062	0.90026	0.130038
330609	2008	330609	197165	4498336	10011.9	2008	2009	2001	5	37	0	0	0	1.04	70.93	21.3672	1.69372	13.6632	53.4236	32.7658	5.36152	0.760267	36.1308	7.28464	58.3672	59.6485	2.22849	51.0882	42.5868	90.9013	42.5604	0.573011	4.3513	3.19096	0	0	15.6247	22.9569	0	42.5328	5.46164	5.27158	8.22294	16.557	0.909	0	0	1.0503	0.0633507
330610	1979	330610	196484	4.48835e+06	10012.3	1979	1972	1981	0	0	0	0	0	0	0	18.1585	0.207464	56.5688	4.32223	12.9198	0.632	2.33674	43.5116	6.6223	16.3849	43.0636	23.9787	48.7405	41.0265	78.1774	22.3696	21.4665	53.9531	-0.910224	0.10005	0	7.67396	14.3309	0	12.4698	11.652	0.995502	4.56802	23.0827	0	0.355142	33.5142	-0.970271	0.315126
330610	1980	330610	196484	4.48835e+06	10012.3	1980	1982	1981	0	0	0	0	0	0	0	18.205	0.207464	56.5688	4.32223	12.9198	0.477	2.23414	43.8367	7.35897	17.0393	41.9844	23.4708	47.9458	41.0265	78.1774	22.3696	21.4665	55.6319	-1.0617	0.10005	0	8.54727	12.855	0	11.6671	11.4256	1.13772	4.46853	23.9917	0	0.405877	32.5939	-1.12889	0.360144
330610	1981	330610	196484	4.48835e+06	10012.3	1981	1982	1981	1	0	0	0	0	0.3	0	18.1594	0.228737	55.0698	5.6179	12.9567	0.321	2.13154	44.1618	8.09564	17.6936	40.9051	22.963	47.1512	41.0265	78.1774	22.3696	21.4665	57.3108	-1.21317	0.10005	0	9.42058	11.3791	0	10.8643	11.1992	1.27993	4.36904	24.9008	0	0.456611	31.6737	-1.28751	0.405162
330610	1982	330610	196484	4.48835e+06	10012.3	1982	1982	1981	0	1	0	0	0	0	0.3	18.1138	0.250011	53.5708	6.91357	12.9936	0.166	2.02894	44.4869	8.83231	18.348	39.8259	22.4552	46.3566	41.0265	78.1774	22.3696	21.4665	58.9896	-1.36464	0.10005	0	10.2939	9.90316	0	10.0616	10.9729	1.42215	4.26955	25.8099	0	0.507346	30.7534	-1.44612	0.45018
330610	1983	330610	196484	4.48835e+06	10012.3	1983	1982	1981	0	1	0	0	0	0	0.3	18.0682	0.271284	52.0718	8.20924	13.0304	0.145	1.97136	41.089	7.79464	18.5263	41.8019	21.9269	50.6493	36.2047	80.96	22.9874	18.5007	60.6685	-1.51611	0.10005	0	11.1672	8.42724	0	9.25882	10.7465	1.56436	4.17007	26.719	0	0.55808	29.8331	-1.60474	0.495198
330610	1984	330610	196484	4.48835e+06	10012.3	1984	1982	1981	0	1	0	0	0	0	0.3	18.0226	0.292558	50.5728	9.50491	13.0673	0.123696	1.91377	37.6911	6.75697	18.7046	43.7779	21.3986	54.9421	31.3829	83.7426	23.6053	15.5348	62.3473	-1.66758	0.10005	0	12.0405	6.95132	0	8.45607	10.5201	1.70657	4.07058	27.628	0	0.608815	28.9129	-1.76336	0.540216
330610	1985	330610	196484	4.48835e+06	10012.3	1985	1982	1981	1	1	1	0	0	6	0.3	17.977	0.313831	49.0738	10.8006	13.1042	0.102704	1.85618	34.2932	5.7193	18.8829	45.7538	20.8704	59.2348	26.5611	86.5251	24.2232	12.5689	64.0262	-1.81905	0.10005	0	12.9138	5.4754	0	7.65333	10.2937	1.84879	3.97109	28.5371	0	0.659549	27.9926	-1.92198	0.585234
330610	1986	330610	196484	4.48835e+06	10012.3	1986	1989	1991	0	2	0	0	0	0	6.3	17.9314	0.335104	47.5748	12.0962	13.1411	0.0817118	1.79859	30.8954	4.68163	19.0611	47.7298	20.3421	63.5276	21.7392	89.3077	24.841	9.60306	34.4772	0.190095	0	0	13.4767	16.7684	0	24.5223	8.49425	2.03102	5.76512	27.4865	0	0.710284	2.45098	0.130052	0.630252
330610	1987	330610	196484	4.48835e+06	10012.3	1987	1989	1991	0	1	0	0	0	0	6	17.8858	0.356378	46.0758	13.3919	13.1779	0.0607196	1.741	27.4975	3.64396	19.2394	49.7058	19.8138	67.8203	16.9174	92.0903	25.4589	6.63719	35.1692	0.015761	0	0	13.6913	16.4707	0	23.5916	8.95241	2.07115	5.75978	27.5914	0	0.253722	3.06339	-0.0642901	0.750301
330610	1988	330610	196484	4.48835e+06	10012.3	1988	1989	1991	1	1	1	0	0	5	6	17.8402	0.377651	44.5768	14.6876	13.2148	0.0397274	1.68341	24.0996	2.60629	19.4177	51.6818	19.2855	72.1131	12.0956	94.8729	26.0768	3.67131	35.8612	-0.158573	0	0	13.9059	16.1729	0	22.661	9.41057	2.11128	5.75444	27.6964	0.029	-0.202839	3.67579	-0.258632	0.87035
330610	1989	330610	196484	4.48835e+06	10012.3	1989	1989	1991	2	2	1	0	0	2.7	11	17.7946	0.398925	43.0778	15.9833	13.2517	0.0187352	1.62582	20.7018	1.56862	19.596	53.6578	18.7573	76.4059	7.27378	97.6555	26.6947	0.705443	36.5531	-0.332907	0	0	14.1204	15.8752	0	21.7304	9.86873	2.15142	5.7491	27.8013	0.027	-0.659401	4.2882	-0.452974	0.9904
330610	1990	330610	196484	4.48835e+06	10012.3	1990	1989	1991	0	4	0	0	0	0	13.7	17.749	0.420198	41.5788	17.2789	13.2886	0.157877	1.55677	23.0996	1.43446	21.6088	52.3324	17.4735	74.1177	11.1305	97.402	29.2302	0.68819	37.2451	-0.507241	0	0	14.335	15.5775	0	20.7998	10.3269	2.19155	5.74376	27.9062	0.026	-1.11596	4.9006	-0.647316	1.11045
330610	1991	330610	196484	4.48835e+06	10012.3	1991	1989	1991	1	3	1	0	0	6	7.7	17.564	0.399553	40.4006	19.9501	14.5651	0.297019	1.48771	25.4974	1.30031	23.6215	51.0071	16.1898	71.8295	14.9872	97.1485	31.7658	0.670936	37.937	-0.681575	0	0	14.5496	15.2798	0	19.8691	10.7851	2.23168	5.73842	28.0112	0.024	-1.57252	5.51301	-0.841658	1.2305
330610	1992	330610	196484	4.48835e+06	10012.3	1992	1989	1991	0	4	0	0	0	0	13.7	17.3791	0.378908	39.2225	22.6213	15.8416	0.436161	1.41865	27.8952	1.16615	25.6343	49.6817	14.906	69.5414	18.844	96.895	34.3014	0.653683	38.629	-0.855909	0	0	14.7641	14.9821	0	18.9385	11.2432	2.27182	5.73308	28.1161	0.023	-2.02909	6.12541	-1.036	1.35055
330610	1993	330610	196484	4.48835e+06	10012.3	1993	1989	1991	0	4	0	0	0	0	13.7	17.1941	0.358263	38.0443	25.2925	17.118	0.575303	1.3496	30.293	1.032	27.6471	48.3564	13.6223	67.2532	22.7007	96.6415	36.837	0.636429	39.3209	-1.03024	0	0	14.9787	14.6844	0	18.0079	11.7014	2.31195	5.72774	28.221	0.021	-2.48565	6.73782	-1.23034	1.4706
330610	1994	330610	196484	4.48835e+06	10012.3	1994	1989	1991	0	3	0	0	0	0	8.7	17.0091	0.337618	36.8662	27.9636	18.3945	0.714445	1.28054	32.6908	0.897846	29.6599	47.031	12.3385	64.965	26.5574	96.3881	39.3725	0.619175	40.0129	-1.20458	0	0	15.1933	14.3866	0	17.0772	12.1595	2.35208	5.7224	28.326	0.02	-2.94221	7.35022	-1.42468	1.59065
330610	1995	330610	196484	4.48835e+06	10012.3	1995	1989	1991	0	1	0	0	0	0	6	16.8242	0.316972	35.6881	30.6348	19.671	0.853587	1.21148	35.0887	0.763691	31.6727	45.7057	11.0548	62.6769	30.4141	96.1346	41.9081	0.601922	40.7049	-1.37891	0	0	15.4078	14.0889	0	16.1466	12.6177	2.39222	5.71706	28.4309	0.019	-3.39877	7.96263	-1.61903	1.71069
330610	1996	330610	196484	4.48835e+06	10012.3	1996	1999	2001	0	1	0	0	0	0	6	16.6392	0.296327	34.5099	33.306	20.9475	0.992729	1.14242	37.4865	0.629537	33.6854	44.3803	9.77101	60.3887	34.2709	95.8811	44.4437	0.584669	41.3968	-1.55324	0	0	15.6224	13.7912	0	15.216	13.0759	2.43235	5.71172	28.5358	0.017	-3.85533	8.57504	-1.81337	1.83074
330610	1997	330610	196484	4.48835e+06	10012.3	1997	1999	2001	0	0	0	0	0	0	0	16.4543	0.275682	33.3318	35.9772	22.224	1.13187	1.07337	39.8843	0.495382	35.6982	43.055	8.48726	58.1006	38.1276	95.6276	46.9793	0.567415	42.0888	-1.72758	0	0	15.837	13.4935	0	14.2854	13.534	2.47248	5.70638	28.6407	0.016	-4.31189	9.18744	-2.00771	1.95079
330610	1998	330610	196484	4.48835e+06	10012.3	1998	1999	2001	0	0	0	0	0	0	0	16.2693	0.255037	32.1537	38.6483	23.5005	1.27101	1.00431	42.2821	0.361228	37.711	41.7296	7.20351	55.8124	41.9843	95.3741	49.5148	0.550161	42.7807	-1.90191	0	0	16.0515	13.1958	0	13.3547	13.9922	2.51262	5.70104	28.7457	0.014	-4.76845	9.79985	-2.20205	2.07084
330610	1999	330610	196484	4.48835e+06	10012.3	1999	1999	2001	0	0	0	0	0	0	0	16.0843	0.234392	30.9755	41.3195	24.777	1.41016	0.935254	44.6799	0.227073	39.7238	40.4043	5.91976	53.5242	45.841	95.1207	52.0504	0.532908	43.4727	-2.07625	0	0	16.2661	12.898	0	12.4241	14.4503	2.55275	5.6957	28.8506	0.013	-5.22502	10.4123	-2.39639	2.19089
330610	2000	330610	196484	4.48835e+06	10012.3	2000	1999	2001	0	0	0	0	0	0	0	15.8994	0.213747	29.7974	43.9907	26.0535	1.89515	0.898731	44.4635	0.898659	42.9983	43.0796	5.56548	52.5859	45.841	95.1207	51.9015	0.532908	22.4812	0.28014	0	0	15.0975	15.938	0	25.6428	11.6958	8.49425	8.90581	24.5986	0.03	0.560224	11.0544	0.270108	1.85074
330610	2001	330610	196484	4.48835e+06	10012.3	2001	1999	2001	0	0	0	0	0	0	0	15.8994	0.213747	29.7974	43.9907	26.0535	2.38015	0.862209	44.2471	1.57024	46.2728	45.755	5.21121	51.6475	45.841	95.1207	51.7525	0.532908	22.5096	0.28014	0	0	15.0959	15.8946	0	25.6662	11.6942	8.48758	8.86783	24.6437	0.03	0.466853	9.23369	0.22509	1.54228
330610	2002	330610	196484	4.48835e+06	10012.3	2002	1999	2001	0	0	0	0	0	0	0	15.8994	0.213747	29.7974	43.9907	26.0535	2.86515	0.825687	44.0307	2.24183	49.5473	48.4303	4.85693	50.7091	45.841	95.1207	51.6036	0.532908	22.5379	0.28014	0	0	15.0942	15.8513	0	25.6895	11.6925	8.48091	8.82985	24.6888	0.03	0.373483	7.41296	0.180072	1.23383
330610	2003	330610	196484	4.48835e+06	10012.3	2003	1999	2001	1	0	0	0	0	0.25	0	15.8994	0.213747	29.7974	43.9907	26.0535	3.35015	0.789165	43.8142	2.91342	52.8218	51.1057	4.50266	49.7707	45.841	95.1207	51.4547	0.532908	22.5663	0.28014	0	0	15.0925	15.8079	0	25.7129	11.6908	8.47424	8.79187	24.7339	0.03	0.280112	5.59223	0.135054	0.92537
330610	2004	330610	196484	4.48835e+06	10012.3	2004	1999	2001	2	1	1	0	0	4.19	0.25	15.8994	0.213747	29.7974	43.9907	26.0535	3.83515	0.752642	43.5978	3.585	56.0963	53.781	4.14839	48.8324	45.841	95.1207	51.3057	0.532908	22.5946	0.28014	0	0	15.0909	15.7645	0	25.7362	11.6892	8.46757	8.75389	24.7791	0.03	0.186741	3.7715	0.090036	0.616913
330610	2005	330610	196484	4.48835e+06	10012.3	2005	1999	2001	0	3	0	0	0	0	4.44	15.8994	0.213747	29.7974	43.9907	26.0535	4.32015	0.71612	43.3814	4.25659	59.3708	56.4564	3.79411	47.894	45.841	95.1207	51.1568	0.532908	22.623	0.28014	0	0	15.0892	15.7212	0	25.7595	11.6875	8.4609	8.71592	24.8242	0.03	0.0933707	1.95076	0.045018	0.308457
330610	2006	330610	196484	4.48835e+06	10012.3	2006	2009	2001	1	3	1	0	0	6.8	4.44	15.8994	0.213747	29.7974	43.9907	26.0535	4.80515	0.679598	43.165	4.92817	62.6453	59.1317	3.43984	46.9556	45.841	95.1207	51.0079	0.532908	22.6513	0.28014	0	0	15.0875	15.6778	0	25.7829	11.6858	8.45423	8.67794	24.8693	0.03	0	0.130033	0	0
330610	2007	330610	196484	4.48835e+06	10012.3	2007	2009	2001	0	4	0	0	0	0	11.24	15.8994	0.213747	29.7974	43.9907	26.0535	5.29014	0.643076	42.9486	5.59976	65.9198	61.8071	3.08556	46.0172	45.841	95.1207	50.8589	0.532908	22.6513	0.28014	0	0	15.0875	15.6778	0	25.7829	11.6858	8.45423	8.67794	24.8693	0.03	0	0.130033	0	0
330610	2008	330610	196484	4.48835e+06	10012.3	2008	2009	2001	1	4	1	0	0	4.3	11.24	15.8994	0.213747	29.7974	43.9907	26.0535	6.26014	0.570031	42.5157	6.94293	72.4688	67.1578	2.37701	44.1405	45.841	95.1207	50.561	0.532908	22.6513	0.28014	0	0	15.0875	15.6778	0	25.7829	11.6858	8.45423	8.67794	24.8693	0.03	0	0	0	0
330611	1979	330611	195805	4478370	10012.2	1979	1972	1981	0	3	0	0	0	0	8.2	5.81877	0.016073	61.9913	4.52994	7.02277	0.072	2.6724	30.9844	3.27084	6.10372	52.6173	26.8599	65.109	21.3297	91.684	24.901	28.8221	22.3372	0.340034	11.9962	0	7.48075	31.2081	2.86029	7.60576	15.9116	0.260026	11.1656	11.7887	0.123	10.246	12.8513	0.345035	0.390039
330611	1980	330611	195805	4478370	10012.2	1980	1982	1981	0	2	0	0	0	0	6.2	5.61079	0.016073	61.9913	4.52994	7.02277	0.048	2.66589	33.3428	3.49195	6.26248	52.9112	27.4577	62.6916	21.3297	91.684	24.901	28.8221	21.4221	0.324318	12.2227	0	7.59647	30.4945	3.2689	8.0951	16.3131	0.262883	11.3298	12.3897	0.136	10.3682	11.4511	0.33289	0.445759
330611	1981	330611	195805	4478370	10012.2	1981	1982	1981	1	2	0	1	0	12	6.2	5.50097	0.075185	60.8736	4.86557	7.92901	0.024	2.65937	35.7012	3.71306	6.42124	53.2051	28.0555	60.2741	21.3297	91.684	24.901	28.8221	20.5071	0.308602	12.4491	0	7.7122	29.7808	3.67751	8.58443	16.7145	0.265741	11.494	12.9907	0.149	10.4903	10.051	0.320746	0.501479
330611	1982	330611	195805	4478370	10012.2	1982	1982	1981	0	1	0	0	0	0	12	5.39114	0.134297	59.756	5.20119	8.83524	0	2.65286	38.0596	3.93417	6.58	53.4989	28.6533	57.8567	21.3297	91.684	24.901	28.8221	19.592	0.292886	12.6756	0	7.82793	29.0672	4.08612	9.07376	17.116	0.268598	11.6581	13.5918	0.162	10.6125	8.65086	0.308602	0.557199
330611	1983	330611	195805	4478370	10012.2	1983	1982	1981	2	1	0	0	0	2	12	5.28132	0.193409	58.6383	5.53682	9.74148	0.035	2.60913	34.6638	3.4929	6.87083	55.1885	28.4035	61.5146	18.5148	92.4709	24.0066	24.7927	18.6769	0.277171	12.902	0	7.94365	28.3535	4.49474	9.5631	17.5175	0.271456	11.8223	14.1928	0.175	10.7346	7.25073	0.296458	0.612918
330611	1984	330611	195805	4478370	10012.2	1984	1982	1981	5	3	2	2	0	53.2	14	5.1715	0.252521	57.5207	5.87245	10.6477	0.0693767	2.56539	31.2679	3.05162	7.16167	56.878	28.1536	65.1726	15.6999	93.2578	23.1121	20.7633	17.7618	0.261455	13.1285	0	8.05938	27.6399	4.90335	10.0524	17.9189	0.274313	11.9864	14.7938	0.188	10.8568	5.85058	0.284314	0.668638
330611	1985	330611	195805	4478370	10012.2	1985	1982	1981	1	8	1	0	0	4.5	67.2	5.06168	0.311633	56.403	6.20807	11.5539	0.104065	2.52166	27.872	2.61034	7.4525	58.5676	27.9037	68.8305	12.885	94.0448	22.2177	16.7338	16.8467	0.245739	13.3549	0	8.1751	26.9263	5.31196	10.5418	18.3204	0.277171	12.1506	15.3948	0.201	10.979	4.45045	0.27217	0.724358
330611	1986	330611	195805	4478370	10012.2	1986	1989	1991	2	9	1	0	0	2	71.7	4.95186	0.370745	55.2853	6.5437	12.4602	0.138753	2.47793	24.4762	2.16907	7.74333	60.2572	27.6539	72.4884	10.0701	94.8317	21.3233	12.7044	15.9316	0.230023	13.5814	0	8.29083	26.2126	5.72057	11.0311	18.7219	0.280028	12.3147	15.9958	0.24	11.1011	3.0503	0.260026	0.780078
330611	1987	330611	195805	4478370	10012.2	1987	1989	1991	3	10	1	1	0	73	61.7	4.84204	0.429857	54.1677	6.87933	13.3664	0.173442	2.43419	21.0803	1.72779	8.03416	61.9467	27.404	76.1464	7.25519	95.6186	20.4288	8.67501	15.5387	0.237881	14.0578	0	8.08795	25.7461	5.31196	10.9661	18.8705	0.845085	12.393	15.6164	0.238	10.7211	3.19389	0.245739	0.815796
330611	1988	330611	195805	4478370	10012.2	1988	1989	1991	1	13	0	0	0	0	134.7	4.73222	0.488969	53.05	7.21496	14.2727	0.20813	2.39046	17.6844	1.28651	8.325	63.6363	27.1542	79.8043	4.44029	96.4055	19.5344	4.6456	15.1458	0.245739	14.5343	0	7.88507	25.2797	4.90335	10.9011	19.019	1.41014	12.4712	15.237	0.328	10.341	3.33748	0.231452	0.851514
330611	1989	330611	195805	4478370	10012.2	1989	1989	1991	2	12	1	0	0	7.3	132.7	4.6224	0.548081	51.9323	7.55058	15.1789	0.242819	2.34672	14.2886	0.845234	8.61583	65.3259	26.9043	83.4622	1.62539	97.1924	18.6399	0.61618	14.7529	0.253597	15.0108	0	7.6822	24.8132	4.49474	10.8361	19.1676	1.9752	12.5494	14.8576	0.327	9.961	3.48106	0.217165	0.887232
330611	1990	330611	195805	4478370	10012.2	1990	1989	1991	2	9	0	1	0	15.6	86.8	4.51258	0.607193	50.8147	7.88621	16.0851	0.245425	2.25461	16.5017	0.934416	10.5901	64.8094	26.8125	81.2584	3.50234	96.7631	20.219	0.60723	14.36	0.261455	15.4873	0	7.47932	24.3467	4.08612	10.7711	19.3162	2.54025	12.6276	14.4782	0.325	9.58096	3.62465	0.202877	0.922949
330611	1991	330611	195805	4478370	10012.2	1991	1989	1991	1	10	0	1	0	20	97.9	4.42091	0.579949	49.1721	11.4428	16.6775	0.248032	2.1625	18.7149	1.0236	12.5643	64.2929	26.7207	79.0546	5.37929	96.3338	21.7981	0.59828	13.9671	0.269313	15.9637	0	7.27644	23.8802	3.67751	10.7061	19.4648	3.10531	12.7058	14.0988	0.324	9.20092	3.76823	0.18859	0.958667
330611	1992	330611	195805	4478370	10012.2	1992	1989	1991	3	9	1	0	0	10.4	115.9	4.32923	0.552706	47.5296	14.9994	17.2699	0.250638	2.07038	20.9281	1.11278	14.5386	63.7764	26.6289	76.8508	7.25624	95.9045	23.3771	0.589329	13.5742	0.277171	16.4402	0	7.07356	23.4138	3.2689	10.6411	19.6134	3.67037	12.7841	13.7194	0.322	8.82088	3.91182	0.174303	0.994385
330611	1993	330611	195805	4478370	10012.2	1993	1989	1991	2	9	0	0	0	1	53.3	4.23756	0.525462	45.887	18.556	17.8623	0.253245	1.97827	23.1413	1.20196	16.5129	63.2599	26.5371	74.6469	9.13318	95.4751	24.9562	0.580379	13.1813	0.285029	16.9167	0	6.87069	22.9473	2.86029	10.5761	19.762	4.23542	12.8623	13.34	0.321	8.44084	4.05541	0.160016	1.0301
330611	1994	330611	195805	4478370	10012.2	1994	1989	1991	1	10	0	0	0	0.5	54.3	4.14589	0.498219	44.2445	22.1126	18.4547	0.255852	1.88616	25.3545	1.29114	18.4871	62.7434	26.4453	72.4431	11.0101	95.0458	26.5352	0.571429	12.7884	0.292886	17.3932	0	6.66781	22.4808	2.45167	10.5111	19.9106	4.80048	12.9405	12.9606	0.32	8.06081	4.19899	0.145729	1.06582
330611	1995	330611	195805	4478370	10012.2	1995	1989	1991	5	9	1	0	1	203.3	47.5	4.05422	0.470975	42.602	25.6692	19.0471	0.258458	1.79404	27.5677	1.38032	20.4614	62.2269	26.3535	70.2393	12.8871	94.6165	28.1143	0.562479	12.3955	0.300744	17.8696	0	6.46493	22.0143	2.04306	10.446	20.0591	5.36554	13.0187	12.5812	0.318	7.68077	4.34258	0.131442	1.10154
330611	1996	330611	195805	4478370	10012.2	1996	1999	2001	4	12	3	0	0	5.4	235.2	3.96254	0.443731	40.9594	29.2258	19.6395	0.261065	1.70193	29.7809	1.46951	22.4356	61.7104	26.2618	68.0355	14.764	94.1872	29.6933	0.553529	12.0026	0.308602	18.3461	0	6.26205	21.5479	1.63445	10.381	20.2077	5.93059	13.0969	12.2018	0.317	7.30073	4.48616	0.117155	1.13726
330611	1997	330611	195805	4478370	10012.2	1997	1999	2001	4	15	2	0	0	3.6	220.6	3.87087	0.416488	39.3169	32.7824	20.2318	0.263671	1.60981	31.9941	1.55869	24.4099	61.1939	26.17	65.8317	16.641	93.7578	31.2724	0.544578	11.6097	0.31646	18.8226	0	6.05918	21.0814	1.22584	10.316	20.3563	6.49565	13.1751	11.8224	0.315	6.92069	4.62975	0.102867	1.17297
330611	1998	330611	195805	4478370	10012.2	1998	1999	2001	3	16	1	0	0	3.3	213.8	3.7792	0.389244	37.6743	36.339	20.8242	0.266278	1.5177	34.2073	1.64787	26.3842	60.6774	26.0782	63.6279	18.5179	93.3285	32.8514	0.535628	11.2168	0.324318	19.2991	0	5.8563	20.6149	0.817225	10.251	20.5049	7.06071	13.2534	11.443	0.314	6.54065	4.77333	0.0885803	1.20869
330611	1999	330611	195805	4478370	10012.2	1999	1999	2001	4	17	0	0	0	1.48	216.1	3.68752	0.362001	36.0318	39.8956	21.4166	0.268885	1.42559	36.4205	1.73705	28.3584	60.1609	25.9864	61.424	20.3949	92.8992	34.4305	0.526678	10.8239	0.332176	19.7755	0	5.65342	20.1484	0.408612	10.186	20.6535	7.62576	13.3316	11.0636	0.312	6.16062	4.91692	0.0742931	1.24441
330611	2000	330611	195805	4478370	10012.2	2000	1999	2001	1	20	0	0	0	0.06	217.08	3.59585	0.334757	34.3892	43.4522	22.009	0.430356	1.36283	38.3414	2.79416	31.8782	59.2847	24.0262	58.286	20.3949	92.8992	34.4517	0.526678	10.431	0.340034	20.252	0	5.45054	19.682	0	10.121	20.8021	8.19082	13.4098	10.6841	0.33	5.78058	5.06051	0.060006	1.28013
330611	2001	330611	195805	4478370	10012.2	2001	1999	2001	2	16	0	0	0	0.7	13.84	3.59585	0.334757	34.3892	43.4522	22.009	0.591828	1.30007	40.2622	3.85128	35.3979	58.4084	22.066	55.148	20.3949	92.8992	34.4729	0.526678	10.4344	0.340034	20.257	0	5.45221	19.672	0	10.1177	20.8004	8.19082	13.4038	10.6834	0.33	4.81715	4.21709	0.050005	1.06677
330611	2002	330611	195805	4478370	10012.2	2002	1999	2001	0	14	0	0	0	0	9.14	3.59585	0.334757	34.3892	43.4522	22.009	0.753299	1.23731	42.183	4.90839	38.9177	57.5322	20.1058	52.01	20.3949	92.8992	34.4942	0.526678	10.4377	0.340034	20.262	0	5.45388	19.662	0	10.1143	20.7987	8.19082	13.3978	10.6826	0.33	3.85372	3.37367	0.040004	0.853419
330611	2003	330611	195805	4478370	10012.2	2003	1999	2001	4	10	0	0	0	0.72	5.54	3.59585	0.334757	34.3892	43.4522	22.009	0.914771	1.17455	44.1038	5.9655	42.4374	56.6559	18.1456	48.872	20.3949	92.8992	34.5154	0.526678	10.441	0.340034	20.267	0	5.45555	19.652	0	10.111	20.7971	8.19082	13.3918	10.6819	0.33	2.89029	2.53025	0.030003	0.640064
330611	2004	330611	195805	4478370	10012.2	2004	1999	2001	0	11	0	0	0	0	2.96	3.59585	0.334757	34.3892	43.4522	22.009	1.07624	1.11179	46.0247	7.02262	45.9571	55.7797	16.1854	45.734	20.3949	92.8992	34.5366	0.526678	10.4444	0.340034	20.272	0	5.45721	19.642	0	10.1077	20.7954	8.19082	13.3858	10.6811	0.33	1.92686	1.68684	0.020002	0.426709
330611	2005	330611	195805	4478370	10012.2	2005	1999	2001	2	7	0	0	0	0.1	1.48	3.59585	0.334757	34.3892	43.4522	22.009	1.23771	1.04903	47.9455	8.07973	49.4769	54.9034	14.2252	42.596	20.3949	92.8992	34.5579	0.526678	10.4477	0.340034	20.277	0	5.45888	19.632	0	10.1043	20.7937	8.19082	13.3799	10.6804	0.33	0.96343	0.843418	0.010001	0.213355
330611	2006	330611	195805	4478370	10012.2	2006	2009	2001	7	8	0	0	0	1.01	1.52	3.59585	0.334757	34.3892	43.4522	22.009	1.39919	0.986266	49.8663	9.13684	52.9966	54.0272	12.265	39.458	20.3949	92.8992	34.5791	0.526678	10.451	0.340034	20.282	0	5.46055	19.622	0	10.101	20.7921	8.19082	13.3739	10.6796	0.33	0	0	0	0
330611	2007	330611	195805	4478370	10012.2	2007	2009	2001	1	13	0	0	0	0.05	1.83	3.59585	0.334757	34.3892	43.4522	22.009	1.56066	0.923506	51.7871	10.194	56.5164	53.1509	10.3049	36.32	20.3949	92.8992	34.6003	0.526678	10.451	0.340034	20.282	0	5.46055	19.622	0	10.101	20.7921	8.19082	13.3739	10.6796	0.33	0	0	0	0
330611	2008	330611	195805	4478370	10012.2	2008	2009	2001	1	14	0	0	0	0.05	1.88	3.59585	0.334757	34.3892	43.4522	22.009	1.8836	0.797986	55.6288	12.3082	63.5559	51.3984	6.38448	30.0441	20.3949	92.8992	34.6428	0.526678	10.451	0.340034	20.282	0	5.46055	19.622	0	10.101	20.7921	8.19082	13.3739	10.6796	0.33	0	0	0	0
330612	1979	330612	195126	4468387	10012.8	1979	1972	1981	0	4	0	0	0	0	45.5	8.28037	0.105972	71.2043	3.7191	6.67732	1.741	2.89394	21.6446	16.6801	4.77	52.8236	33.4146	59.6803	30.2851	81.7919	14.6816	15.4748	3.4807	0.065013	32.2164	0	12.0174	6.43129	6.53631	2.71554	33.3417	3.19564	2.23963	2.55325	0.11	24.0298	4.67093	0.035007	1.38528
330612	1980	330612	195126	4468387	10012.8	1980	1982	1981	3	2	1	0	0	6	34.5	8.02478	0.105972	71.2043	3.7191	6.67732	1.635	2.86939	23.9416	16.0258	4.8573	52.7469	33.8414	58.1779	30.2851	81.7919	14.6816	15.4748	2.98345	0.0728717	31.0819	0	12.6868	6.33127	7.4472	2.70483	33.0638	3.62787	2.24081	2.43767	0.12	22.6445	4.20513	0.040008	1.58317
330612	1981	330612	195126	4468387	10012.8	1981	1982	1981	1	5	1	0	0	7	40.5	7.83983	0.164	69.7581	4.30104	6.94977	1.529	2.84483	26.2387	15.3716	4.94459	52.6703	34.2682	56.6754	30.2851	81.7919	14.6816	15.4748	2.48621	0.0807304	29.9474	0	13.3562	6.23125	8.3581	2.69411	32.7858	4.0601	2.24198	2.32209	0.13	21.2593	3.73932	0.045009	1.78107
330612	1982	330612	195126	4468387	10012.8	1982	1982	1981	2	5	0	0	0	1.1	20	7.65488	0.222027	68.3118	4.88299	7.22222	1.424	2.82027	28.5357	14.7173	5.03188	52.5936	34.695	55.173	30.2851	81.7919	14.6816	15.4748	1.98897	0.0885891	28.8129	0	14.0257	6.13123	9.269	2.68339	32.5079	4.49233	2.24316	2.20652	0.14	19.874	3.27351	0.05001	1.97897
330612	1983	330612	195126	4468387	10012.8	1983	1982	1981	0	6	0	0	0	0	14.1	7.46992	0.280055	66.8656	5.46493	7.49467	1.228	2.78067	25.597	13.1657	5.21556	53.4405	34.3431	59.7014	26.3447	83.797	14.5893	13.3136	1.49173	0.0964479	27.6784	0	14.6951	6.03121	10.1799	2.67268	32.23	4.92456	2.24434	2.09094	0.15	18.4887	2.8077	0.055011	2.17686
330612	1984	330612	195126	4468387	10012.8	1984	1982	1981	2	6	1	0	0	2.9	14.1	7.28497	0.338082	65.4194	6.04687	7.76712	1.03229	2.74106	22.6583	11.6142	5.39924	54.2874	33.9911	64.2298	22.4042	85.8021	14.497	11.1524	0.994485	0.104307	26.5439	0	15.3645	5.93119	11.0908	2.66196	31.9521	5.35679	2.24552	1.97536	0.16	17.1034	2.3419	0.060012	2.37476
330612	1985	330612	195126	4468387	10012.8	1985	1982	1981	3	8	2	1	0	24	17	7.10002	0.39611	63.9732	6.62881	8.03956	0.836679	2.70145	19.7196	10.0626	5.58292	55.1343	33.6392	68.7582	18.4638	87.8072	14.4048	8.99117	0.497242	0.112165	25.4094	0	16.0339	5.83117	12.0017	2.65124	31.6742	5.78901	2.24669	1.85979	0.17	15.7181	1.87609	0.065013	2.57266
330612	1986	330612	195126	4468387	10012.8	1986	1989	1991	0	8	0	0	0	0	35	6.91506	0.454138	62.5269	7.21075	8.31201	0.641072	2.66184	16.7809	8.51099	5.7666	55.9812	33.2873	73.2866	14.5234	89.8122	14.3125	6.82997	0	0.120024	24.2749	0	16.7033	5.73115	12.9126	2.64053	31.3963	6.22124	2.24787	1.74421	0.2	14.3329	1.41028	0.070014	2.77055
330612	1987	330612	195126	4468387	10012.8	1987	1989	1991	0	7	0	0	0	0	28	6.73011	0.512165	61.0807	7.79269	8.58446	0.445464	2.62223	13.8422	6.95942	5.95028	56.8281	32.9354	77.8151	10.5829	91.8173	14.2203	4.66876	0	0.111451	23.2475	0	16.8448	5.58826	11.9903	2.7627	31.0426	8.40811	2.27193	1.7455	0.198	13.3455	1.34527	0.072158	3.34789
330612	1988	330612	195126	4468387	10012.8	1988	1989	1991	0	5	0	0	0	0	26.9	6.54515	0.570193	59.6345	8.37463	8.85691	0.249857	2.58262	10.9035	5.40784	6.13395	57.675	32.5834	82.3435	6.64248	93.8224	14.128	2.50755	0	0.102878	22.2202	0	16.9863	5.44537	11.0679	2.88486	30.689	10.595	2.29599	1.74678	0.208	12.3582	1.28026	0.074302	3.92523
330612	1989	330612	195126	4468387	10012.8	1989	1989	1991	0	5	0	0	0	0	26.9	6.3602	0.62822	58.1882	8.95657	9.12936	0.0542502	2.54301	7.96479	3.85626	6.31763	58.5219	32.2315	86.8719	2.70204	95.8274	14.0357	0.346346	0	0.0943046	21.1928	0	17.1277	5.30249	10.1456	3.00703	30.3354	12.7818	2.32005	1.74807	0.207	11.3709	1.21525	0.076446	4.50256
330612	1990	330612	195126	4468387	10012.8	1990	1989	1991	0	3	0	0	0	0	24	6.17525	0.686248	56.742	9.53851	9.40181	0.0829261	2.50614	8.2918	3.62297	6.53889	58.8667	33.8222	86.8597	3.76332	95.9763	14.6553	0.357071	0	0.0857314	20.1655	0	17.2692	5.1596	9.22327	3.1292	29.9817	14.9687	2.34411	1.74935	0.205	10.3835	1.15024	0.07859	5.0799
330612	1991	330612	195126	4468387	10012.8	1991	1989	1991	0	0	0	0	0	0	0	6.08138	0.650498	56.1407	12.1651	9.79331	0.111602	2.46926	8.61882	3.38969	6.76014	59.2114	35.4128	86.8475	4.8246	96.1251	15.2748	0.367796	0	0.0771583	19.1381	0	17.4106	5.01672	8.30095	3.25136	29.6281	17.1556	2.36817	1.75064	0.204	9.39618	1.08523	0.080734	5.65723
330612	1992	330612	195126	4468387	10012.8	1992	1989	1991	0	0	0	0	0	0	0	5.98752	0.614748	55.5393	14.7916	10.1848	0.140278	2.43239	8.94584	3.1564	6.9814	59.5561	37.0035	86.8354	5.88589	96.274	15.8944	0.378521	0	0.0685851	18.1108	0	17.5521	4.87383	7.37862	3.37353	29.2744	19.3424	2.39223	1.75193	0.203	8.40885	1.02023	0.082878	6.23457
330612	1993	330612	195126	4468387	10012.8	1993	1989	1991	0	0	0	0	0	0	0	5.89366	0.578998	54.938	17.4182	10.5763	0.168954	2.39551	9.27285	2.92311	7.20266	59.9008	38.5941	86.8232	6.94717	96.4228	16.5139	0.389246	0	0.060012	17.0834	0	17.6935	4.73095	6.45629	3.4957	28.9208	21.5293	2.41629	1.75321	0.201	7.42151	0.955216	0.085022	6.81191
330612	1994	330612	195126	4468387	10012.8	1994	1989	1991	0	0	0	0	0	0	0	5.7998	0.543248	54.3366	20.0447	10.9678	0.19763	2.35864	9.59987	2.68982	7.42391	60.2456	40.1847	86.811	8.00845	96.5717	17.1334	0.399971	0	0.0514389	16.0561	0	17.835	4.58806	5.53396	3.61787	28.5671	23.7162	2.44035	1.7545	0.2	6.43417	0.890207	0.087166	7.38924
330612	1995	330612	195126	4468387	10012.8	1995	1989	1991	1	0	0	0	0	0	0	5.70593	0.507498	53.7353	22.6713	11.3593	0.226306	2.32176	9.92688	2.45653	7.64517	60.5903	41.7754	86.7989	9.06973	96.7206	17.753	0.410697	0	0.0428657	15.0287	0	17.9765	4.44517	4.61164	3.74003	28.2135	25.903	2.46441	1.75579	0.198	5.44684	0.825197	0.08931	7.96658
330612	1996	330612	195126	4468387	10012.8	1996	1999	2001	0	1	0	0	0	0	0	5.61207	0.471749	53.134	25.2979	11.7508	0.254982	2.28489	10.2539	2.22325	7.86642	60.935	43.366	86.7867	10.131	96.8694	18.3725	0.421422	0	0.0342926	14.0014	0	18.1179	4.30229	3.68931	3.8622	27.8599	28.0899	2.48847	1.75707	0.197	4.4595	0.760188	0.091454	8.54391
330612	1997	330612	195126	4468387	10012.8	1997	1999	2001	0	1	0	0	0	0	0	5.51821	0.435999	52.5326	27.9244	12.1423	0.283658	2.24801	10.5809	1.98996	8.08768	61.2797	44.9567	86.7745	11.1923	97.0183	18.9921	0.432147	0	0.0257194	12.974	0	18.2594	4.1594	2.76698	3.98437	27.5062	30.2768	2.51253	1.75836	0.195	3.47216	0.695178	0.093598	9.12125
330612	1998	330612	195126	4468387	10012.8	1998	1999	2001	2	1	0	0	1	272.24	0	5.42435	0.400249	51.9313	30.551	12.5338	0.312334	2.21114	10.9079	1.75667	8.30893	61.6244	46.5473	86.7623	12.2536	97.1671	19.6116	0.442872	0	0.0171463	11.9467	0	18.4008	4.01652	1.84465	4.10654	27.1526	32.4636	2.53659	1.75965	0.194	2.48483	0.630169	0.095742	9.69858
330612	1999	330612	195126	4468387	10012.8	1999	1999	2001	1	3	0	0	0	0.05	272.24	5.33048	0.364499	51.3299	33.1775	12.9253	0.34101	2.17426	11.2349	1.52338	8.53019	61.9692	48.138	86.7502	13.3149	97.316	20.2311	0.453597	0	0.00857314	10.9193	0	18.5423	3.87363	0.922327	4.2287	26.7989	34.6505	2.56065	1.76093	0.193	1.49749	0.565159	0.097886	10.2759
330612	2000	330612	195126	4468387	10012.8	2000	1999	2001	1	4	0	0	0	0.6	272.29	5.23662	0.328749	50.7286	35.8041	13.3168	0.79625	2.29467	11.4954	2.23758	9.45049	63.0322	43.5428	85.321	13.3149	97.316	19.9745	0.453597	0	0	9.89198	0	18.6837	3.73075	0	4.35087	26.4453	36.8374	2.58471	1.76222	0.21	0.510153	0.50015	0.10003	10.8533
330612	2001	330612	195126	4468387	10012.8	2001	1999	2001	2	4	0	0	0	0.4	272.89	5.23662	0.328749	50.7286	35.8041	13.3168	1.25149	2.41507	11.7559	2.95177	10.3708	64.0953	38.9476	83.8918	13.3149	97.316	19.7178	0.453597	0	0	9.89198	0	18.6837	3.73408	0	4.3492	26.442	36.839	2.58228	1.75757	0.21	0.425127	0.416792	0.0833583	9.04458
330612	2002	330612	195126	4468387	10012.8	2002	1999	2001	2	6	1	0	0	2.05	273.29	5.23662	0.328749	50.7286	35.8041	13.3168	1.70673	2.53548	12.0164	3.66597	11.2911	65.1583	34.3524	82.4626	13.3149	97.316	19.4611	0.453597	0	0	9.89198	0	18.6837	3.73741	0	4.34754	26.4386	36.8407	2.57985	1.75292	0.21	0.340102	0.333433	0.0666867	7.23591
330612	2003	330612	195126	4468387	10012.8	2003	1999	2001	0	8	0	0	0	0	275.34	5.23662	0.328749	50.7286	35.8041	13.3168	2.16197	2.65588	12.2769	4.38016	12.2114	66.2214	29.7572	81.0334	13.3149	97.316	19.2044	0.453597	0	0	9.89198	0	18.6837	3.74075	0	4.34587	26.4353	36.8424	2.57743	1.74828	0.21	0.255077	0.250075	0.050015	5.42724
330612	2004	330612	195126	4468387	10012.8	2004	1999	2001	0	6	0	0	0	0	3.1	5.23662	0.328749	50.7286	35.8041	13.3168	2.61721	2.77629	12.5374	5.09436	13.1317	67.2844	25.162	79.6042	13.3149	97.316	18.9477	0.453597	0	0	9.89198	0	18.6837	3.74408	0	4.3442	26.432	36.844	2.575	1.74363	0.21	0.170051	0.166717	0.0333433	3.61856
330612	2005	330612	195126	4468387	10012.8	2005	1999	2001	1	5	0	0	0	0.05	3.05	5.23662	0.328749	50.7286	35.8041	13.3168	3.07245	2.89669	12.7979	5.80856	14.052	68.3475	20.5668	78.175	13.3149	97.316	18.6911	0.453597	0	0	9.89198	0	18.6837	3.74742	0	4.34253	26.4286	36.8457	2.57257	1.73898	0.21	0.0850255	0.0833583	0.0166717	1.80989
330612	2006	330612	195126	4468387	10012.8	2006	2009	2001	0	5	0	0	0	0	2.5	5.23662	0.328749	50.7286	35.8041	13.3168	3.52769	3.0171	13.0584	6.52275	14.9723	69.4105	15.9716	76.7458	13.3149	97.316	18.4344	0.453597	0	0	9.89198	0	18.6837	3.75075	0	4.34087	26.4253	36.8474	2.57014	1.73434	0.21	0	0	0	0.00121757
330612	2007	330612	195126	4468387	10012.8	2007	2009	2001	0	3	0	0	0	0	2.1	5.23662	0.328749	50.7286	35.8041	13.3168	3.98293	3.1375	13.3189	7.23695	15.8926	70.4736	11.3764	75.3166	13.3149	97.316	18.1777	0.453597	0	0	9.89198	0	18.6837	3.75075	0	4.34087	26.4253	36.8474	2.57014	1.73434	0.21	0	0	0	0.00121757
330612	2008	330612	195126	4468387	10012.8	2008	2009	2001	3	1	0	0	0	0.4	0.05	5.23662	0.328749	50.7286	35.8041	13.3168	4.89341	3.37831	13.8399	8.66534	17.7332	72.5997	2.18597	72.4582	13.3149	97.316	17.6644	0.453597	0	0	9.89198	0	18.6837	3.75075	0	4.34087	26.4253	36.8474	2.57014	1.73434	0.21	0	0	0	0
330613	1979	330613	194449	4458404	10012.2	1979	1972	1981	15	26	7	5	2	1616.4	304.1	10.4012	0.880481	60.2301	11.1669	3.37379	19.929	8.86056	19.9885	12.8435	4.10409	36.351	71.0947	46.6702	55.7603	69.6014	13.0991	44.6635	1.89038	0.35007	21.5443	25.8002	7.15643	0.530106	3.34067	2.57051	31.7463	5.05101	21.3222	3.25924	1.01	17.6885	6.53131	0.205041	2.9906
330613	1980	330613	194449	4458404	10012.2	1980	1982	1981	13	38	3	4	2	329.9	1913.5	10.0938	0.880481	60.2301	11.1669	3.37379	21.617	8.77278	22.1438	14.4442	4.11171	35.8571	70.94	41.3658	55.7603	69.6014	13.0991	44.6635	2.00183	0.382934	21.8315	25.3808	7.03712	0.545823	3.55928	2.47621	31.925	4.83668	21.1763	3.22736	1.031	16.479	6.00977	0.231475	3.41783
330613	1981	330613	194449	4458404	10012.2	1981	1982	1981	16	45	5	4	1	524.2	2184.6	9.93327	1.02951	60.5709	10.7336	4.04452	23.304	8.68501	24.299	16.0449	4.11932	35.3633	70.7853	36.0614	55.7603	69.6014	13.0991	44.6635	2.11328	0.415797	22.1187	24.9614	6.91781	0.561541	3.7779	2.3819	32.1036	4.62235	21.0304	3.19549	1.052	15.2695	5.48824	0.257909	3.84505
330613	1982	330613	194449	4458404	10012.2	1982	1982	1981	14	56	10	2	0	85.6	2546.5	9.77279	1.17853	60.9117	10.3002	4.71526	24.992	8.59724	26.4542	17.6455	4.12694	34.8694	70.6306	30.757	55.7603	69.6014	13.0991	44.6635	2.22473	0.448661	22.4059	24.5421	6.7985	0.577258	3.99651	2.2876	32.2822	4.40802	20.8845	3.16361	1.073	14.06	4.96671	0.284343	4.27228
330613	1983	330613	194449	4458404	10012.2	1983	1982	1981	18	62	9	2	0	123.9	2561.3	9.61231	1.32756	61.2525	9.86682	5.38599	21.55	8.60821	22.7461	15.1648	4.14686	35.8348	71.4458	40.2881	48.3804	72.9642	13.1525	38.4622	2.33618	0.481525	22.6931	24.1227	6.67919	0.592976	4.21513	2.1933	32.4608	4.1937	20.7387	3.13173	1.094	12.8504	4.44517	0.310776	4.69951
330613	1984	330613	194449	4458404	10012.2	1984	1982	1981	20	76	6	1	1	300.8	2680	9.45183	1.47659	61.5934	9.43345	6.05673	18.1082	8.61917	19.038	12.684	4.16679	36.8002	72.2609	49.8192	41.0006	76.327	13.206	32.2608	2.44763	0.514389	22.9803	23.7033	6.55988	0.608693	4.43374	2.09899	32.6394	3.97937	20.5928	3.09985	1.115	11.6409	3.92364	0.33721	5.12674
330613	1985	330613	194449	4458404	10012.2	1985	1982	1981	26	81	11	5	0	214.1	1364.4	9.29135	1.62561	61.9342	9.00009	6.72746	14.6665	8.63014	15.3299	10.2033	4.18671	37.7657	73.0761	59.3503	33.6208	79.6898	13.2594	26.0595	2.55908	0.547252	23.2675	23.2839	6.44057	0.624411	4.65236	2.00469	32.818	3.76504	20.4469	3.06798	1.136	10.4314	3.40211	0.363644	5.55397
330613	1986	330613	194449	4458404	10012.2	1986	1989	1991	36	94	15	6	2	756.5	1248.6	9.13087	1.77464	62.275	8.56672	7.39819	11.2248	8.64111	11.6218	7.72253	4.20663	38.7311	73.8912	68.8814	26.2409	83.0526	13.3128	19.8582	2.67053	0.580116	23.5547	22.8646	6.32126	0.640128	4.87097	1.91038	32.9966	3.55071	20.3011	3.0361	1.199	9.22184	2.88058	0.390078	5.9812
330613	1987	330613	194449	4458404	10012.2	1987	1989	1991	19	114	7	5	0	207.4	1480.9	8.97039	1.92366	62.6158	8.13335	8.06893	7.7831	8.65207	7.91364	5.24178	4.22656	39.6966	74.7064	78.4125	18.8611	86.4154	13.3663	13.6569	2.47978	0.538679	23.4325	23.0682	6.34555	0.611551	4.88312	1.83537	32.843	3.67716	20.627	2.88071	1.197	8.94322	3.30923	0.362215	5.68471
330613	1988	330613	194449	4458404	10012.2	1988	1989	1991	65	119	22	2	0	160.3	1602.7	8.80991	2.07269	62.9566	7.69999	8.73966	4.3414	8.66304	4.20551	2.76103	4.24648	40.662	75.5215	87.9436	11.4812	89.7782	13.4197	7.45562	2.28903	0.497242	23.3104	23.2718	6.36985	0.582974	4.89526	1.76035	32.6894	3.80362	20.9529	2.72532	1.017	8.66459	3.73789	0.334353	5.38822
330613	1989	330613	194449	4458404	10012.2	1989	1989	1991	97	166	35	20	1	1224.4	1639.1	8.64943	2.22172	63.2974	7.26662	9.4104	0.899698	8.67401	0.497392	0.28028	4.2664	41.6274	76.3367	97.4746	4.10139	93.141	13.4731	1.25432	2.09828	0.455805	23.1882	23.4754	6.39414	0.554397	4.90741	1.68534	32.5358	3.93007	21.2788	2.56993	1.016	8.38596	4.16655	0.30649	5.09173
330613	1990	330613	194449	4458404	10012.2	1990	1989	1991	32	243	9	3	1	252.4	2562.7	8.48895	2.37074	63.6382	6.83326	10.0811	0.888738	8.37484	0.575995	0.577381	4.20269	42.7362	76.4412	97.1795	4.41029	93.5187	13.5359	1.23141	1.90752	0.414369	23.066	23.679	6.41843	0.525819	4.91956	1.61032	32.3822	4.05653	21.6047	2.41453	1.014	8.10734	4.5952	0.278627	4.79524
330613	1991	330613	194449	4458404	10012.2	1991	1989	1991	43	249	13	4	3	2700.8	2601	8.36333	2.21854	58.1468	12.4686	11.8668	0.877779	8.07567	0.654598	0.874482	4.13897	43.845	76.5458	96.8844	4.71918	93.8964	13.5987	1.20849	1.71677	0.372932	22.9439	23.8826	6.44272	0.497242	4.9317	1.53531	32.2286	4.18298	21.9306	2.25914	1.013	7.82871	5.02386	0.250764	4.49876
330613	1992	330613	194449	4458404	10012.2	1992	1989	1991	22	256	8	3	1	272.9	4545.3	8.23771	2.06633	52.6553	18.1039	13.6525	0.866819	7.77651	0.733201	1.17158	4.07525	44.9538	76.6503	96.5893	5.02808	94.2741	13.6615	1.18558	1.52602	0.331495	22.8217	24.0862	6.46701	0.468665	4.94385	1.46029	32.075	4.30943	22.2565	2.10375	1.012	7.55008	5.45252	0.222902	4.20227
330613	1993	330613	194449	4458404	10012.2	1993	1989	1991	16	259	2	1	0	28.1	4610.8	8.11208	1.91413	47.1639	23.7393	15.4382	0.855859	7.47734	0.811804	1.46868	4.01154	46.0626	76.7548	96.2942	5.33698	94.6518	13.7244	1.16267	1.33527	0.290058	22.6995	24.2899	6.4913	0.440088	4.95599	1.38528	31.9214	4.43589	22.5824	1.94836	1.01	7.27145	5.88118	0.195039	3.90578
330613	1994	330613	194449	4458404	10012.2	1994	1989	1991	23	210	4	4	0	100.1	4478.6	7.98646	1.76192	41.6724	29.3746	17.2239	0.8449	7.17818	0.890407	1.76579	3.94782	47.1714	76.8594	95.9991	5.64587	95.0295	13.7872	1.13976	1.14451	0.248621	22.5774	24.4935	6.51559	0.411511	4.96814	1.31026	31.7678	4.56234	22.9083	1.79297	1.009	6.99283	6.30983	0.167176	3.60929
330613	1995	330613	194449	4458404	10012.2	1995	1989	1991	41	136	11	3	0	122	3354.3	7.86083	1.60972	36.181	35.0099	19.0096	0.83394	6.87901	0.96901	2.06289	3.88411	48.2802	76.9639	95.704	5.95477	95.4072	13.85	1.11684	0.953762	0.207184	22.4552	24.6971	6.53988	0.382934	4.98028	1.23525	31.6142	4.68879	23.2342	1.63758	1.007	6.7142	6.73849	0.139314	3.31281
330613	1996	330613	194449	4458404	10012.2	1996	1999	2001	28	145	3	0	0	12	3223.9	7.73521	1.45751	30.6895	40.6452	20.7954	0.822981	6.57984	1.04761	2.35999	3.82039	49.389	77.0685	95.4089	6.26366	95.7849	13.9128	1.09393	0.76301	0.165747	22.333	24.9007	6.56417	0.354357	4.99243	1.16023	31.4606	4.81525	23.5601	1.48218	1.006	6.43557	7.16715	0.111451	3.01632
330613	1997	330613	194449	4458404	10012.2	1997	1999	2001	26	130	4	1	0	37.1	535.1	7.60958	1.30531	25.1981	46.2806	22.5811	0.812021	6.28068	1.12622	2.65709	3.75667	50.4978	77.173	95.1138	6.57256	96.1625	13.9756	1.07102	0.572257	0.124311	22.2109	25.1043	6.58846	0.325779	5.00457	1.08522	31.307	4.9417	23.886	1.32679	1.004	6.15695	7.5958	0.0835881	2.71983
330613	1998	330613	194449	4458404	10012.2	1998	1999	2001	43	134	14	3	0	131.66	299.3	7.48396	1.1531	19.7066	51.9159	24.3668	0.801061	5.98151	1.20482	2.95419	3.69296	51.6066	77.2775	94.8187	6.88146	96.5402	14.0384	1.0481	0.381505	0.0828737	22.0887	25.3079	6.61275	0.297202	5.01672	1.0102	31.1534	5.06816	24.2119	1.1714	1.003	5.87832	8.02446	0.0557254	2.42334
330613	1999	330613	194449	4458404	10012.2	1999	1999	2001	54	161	19	2	0	171.08	402.86	7.35834	1.0009	14.2152	57.5512	26.1525	0.790102	5.68235	1.28342	3.25129	3.62924	52.7154	77.3821	94.5236	7.19035	96.9179	14.1012	1.02519	0.190752	0.0414369	21.9665	25.5115	6.63704	0.268625	5.02886	0.935187	30.9998	5.19461	24.5378	1.01601	1.002	5.59969	8.45312	0.0278627	2.12685
330613	2000	330613	194449	4458404	10012.2	2000	1999	2001	43	192	15	1	0	144.2	473.84	7.23271	0.848694	8.72371	63.1866	27.9382	1.12715	5.44924	1.64968	3.20025	4.09955	54.5397	69.7659	93.8717	7.19035	96.9179	14.6013	1.02519	0	0	21.8444	25.7151	6.66133	0.240048	5.04101	0.860172	30.8462	5.32106	24.8637	0.860618	1.019	5.32106	8.88178	0	1.83037
330613	2001	330613	194449	4458404	10012.2	2001	1999	2001	25	194	6	0	0	20.07	496.04	7.23271	0.848694	8.72371	63.1866	27.9382	1.4642	5.21614	2.01593	3.14921	4.56986	56.364	62.1497	93.2198	7.19035	96.9179	15.1013	1.02519	0	0	21.7927	25.7201	6.68134	0.240048	5.04101	0.865173	30.6211	5.62946	24.8512	0.867609	1.019	4.43422	7.40148	0	1.76037
330613	2002	330613	194449	4458404	10012.2	2002	1999	2001	16	191	6	1	0	35.13	504.11	7.23271	0.848694	8.72371	63.1866	27.9382	1.80125	4.98304	2.38219	3.09817	5.04017	58.1883	54.5335	92.5679	7.19035	96.9179	15.6014	1.02519	0	0	21.741	25.7251	6.70134	0.240048	5.04101	0.870174	30.3961	5.93785	24.8388	0.874599	1.019	3.54738	5.92118	0	1.69038
330613	2003	330613	194449	4458404	10012.2	2003	1999	2001	36	181	10	2	0	59.7	502.14	7.23271	0.848694	8.72371	63.1866	27.9382	2.1383	4.74994	2.74844	3.04713	5.51048	60.0126	46.9174	91.9161	7.19035	96.9179	16.1015	1.02519	0	0	21.6893	25.7301	6.72134	0.240048	5.04101	0.875175	30.171	6.24625	24.8263	0.88159	1.019	2.66053	4.44089	0	1.62039
330613	2004	330613	194449	4458404	10012.2	2004	1999	2001	73	174	12	2	0	148.3	430.18	7.23271	0.848694	8.72371	63.1866	27.9382	2.47535	4.51684	3.1147	2.99609	5.98078	61.8369	39.3012	91.2642	7.19035	96.9179	16.6016	1.02519	0	0	21.6377	25.7351	6.74135	0.240048	5.04101	0.880176	29.946	6.55464	24.8139	0.888581	1.019	1.77369	2.96059	0	1.5504
330613	2005	330613	194449	4458404	10012.2	2005	1999	2001	64	193	17	1	1	751.89	407.4	7.23271	0.848694	8.72371	63.1866	27.9382	2.8124	4.28374	3.48096	2.94505	6.45109	63.6612	31.685	90.6123	7.19035	96.9179	17.1016	1.02519	0	0	21.586	25.7401	6.76135	0.240048	5.04101	0.885177	29.7209	6.86304	24.8014	0.895571	1.019	0.886844	1.4803	0	1.48041
330613	2006	330613	194449	4458404	10012.2	2006	2009	2001	32	214	8	1	0	39.57	1015.09	7.23271	0.848694	8.72371	63.1866	27.9382	3.14945	4.05063	3.84721	2.89401	6.9214	65.4854	24.0688	89.9604	7.19035	96.9179	17.6017	1.02519	0	0	21.5343	25.7451	6.78136	0.240048	5.04101	0.890178	29.4959	7.17143	24.789	0.902562	1.019	0	0	0	1.41042
330613	2007	330613	194449	4458404	10012.2	2007	2009	2001	10	221	1	0	0	6.79	1034.59	7.23271	0.848694	8.72371	63.1866	27.9382	3.4865	3.81753	4.21347	2.84297	7.39171	67.3097	16.4527	89.3085	7.19035	96.9179	18.1018	1.02519	0	0	21.5343	25.7451	6.78136	0.240048	5.04101	0.890178	29.4959	7.17143	24.789	0.902562	1.019	0	0	0	1.41042
330613	2008	330613	194449	4458404	10012.2	2008	2009	2001	27	215	9	0	0	34.73	1006.25	7.23271	0.848694	8.72371	63.1866	27.9382	4.1606	3.35133	4.94598	2.74089	8.33233	70.9583	1.22031	88.0047	7.19035	96.9179	19.1019	1.02519	0	0	21.5343	25.7451	6.78136	0.240048	5.04101	0.890178	29.4959	7.17143	24.789	0.902562	1.019	0	0	0	1.34042
330614	1979	330614	193773	4.44842e+06	10013.2	1979	1972	1981	5	4	2	2	1	413	1110	16.0754	0.395791	58.1277	10.5904	4.21924	11.833	4.06599	28.7354	12.4563	7.46481	39.6332	57.6733	46.3838	51.1866	74.5174	12.1069	31.1391	27.755	0.0550495	1.04594	1.80162	9.67371	24.7423	0.345311	8.60775	13.9125	1.28115	5.88216	17.9252	0	0.715644	28.6258	0	0.0750675
330614	1980	330614	193773	4.44842e+06	10013.2	1980	1982	1981	2	8	0	1	1	310	1520	15.8688	0.395791	58.1277	10.5904	4.21924	12.154	4.0408	30.853	13.9297	7.49956	39.1644	57.58	42.6182	51.1866	74.5174	12.1069	31.1391	28.1282	0.0629137	0.945136	1.7673	9.204	24.6336	0.374623	8.70069	13.6766	1.46417	5.74932	18.0266	0	0.639147	25.7146	0	0.0857914
330614	1981	330614	193773	4.44842e+06	10013.2	1981	1982	1981	4	10	2	0	1	306.6	1830	15.7991	0.467026	58.8421	10.1612	4.94613	12.475	4.01562	32.9707	15.4032	7.53432	38.6957	57.4867	38.8525	51.1866	74.5174	12.1069	31.1391	28.5014	0.0707779	0.844331	1.73299	8.73429	24.5249	0.403935	8.79363	13.4407	1.6472	5.61649	18.128	0	0.562649	22.8034	0	0.0965154
330614	1982	330614	193773	4.44842e+06	10013.2	1982	1982	1981	2	14	2	0	0	10	2136.6	15.7295	0.538261	59.5566	9.73213	5.67302	12.796	3.99043	35.0884	16.8766	7.56907	38.227	57.3933	35.0868	51.1866	74.5174	12.1069	31.1391	28.8746	0.0786421	0.743526	1.69867	8.26458	24.4163	0.433247	8.88657	13.2047	1.83022	5.48365	18.2295	0	0.486152	19.8922	0	0.107239
330614	1983	330614	193773	4.44842e+06	10013.2	1983	1982	1981	4	15	2	0	0	18.2	2106.6	15.6598	0.609496	60.2711	9.30302	6.39991	11.055	4.05357	30.4874	14.5138	7.44352	38.7093	58.4711	43.6916	44.5743	76.889	12.5654	26.7673	29.2478	0.0865064	0.642721	1.66435	7.79487	24.3076	0.462559	8.97951	12.9688	2.01324	5.35082	18.3309	0	0.409654	16.981	0	0.117963
330614	1984	330614	193773	4.44842e+06	10013.2	1984	1982	1981	3	17	2	0	0	11.2	1057.8	15.5902	0.680731	60.9856	8.87391	7.1268	9.3148	4.11671	25.8864	12.151	7.31797	39.1915	59.5488	52.2964	37.962	79.2606	13.0238	22.3955	29.6209	0.0943706	0.541916	1.63004	7.32516	24.1989	0.491871	9.07245	12.7329	2.19626	5.21798	18.4323	0	0.333157	14.0698	0	0.128687
330614	1985	330614	193773	4.44842e+06	10013.2	1985	1982	1981	16	15	7	5	1	248.1	656	15.5205	0.751966	61.7001	8.4448	7.85369	7.5744	4.17986	21.2853	9.78817	7.19242	39.6738	60.6265	60.9012	31.3497	81.6323	13.4823	18.0237	29.9941	0.102235	0.441111	1.59572	6.85546	24.0903	0.521183	9.16539	12.497	2.37928	5.08515	18.5337	0	0.256659	11.1586	0	0.139411
330614	1986	330614	193773	4.44842e+06	10013.2	1986	1989	1991	1	29	0	1	0	22	594.1	15.4509	0.823202	62.4146	8.01569	8.58058	5.834	4.243	16.6843	7.42535	7.06688	40.1561	61.7042	69.506	24.7374	84.0039	13.9408	13.652	30.3673	0.110099	0.340306	1.5614	6.38575	23.9816	0.550495	9.25833	12.261	2.56231	4.95231	18.6351	0	0.180162	8.24742	0	0.150135
330614	1987	330614	193773	4.44842e+06	10013.2	1987	1989	1991	0	26	0	0	0	0	309.5	15.3812	0.894437	63.1291	7.58658	9.30747	4.0936	4.30614	12.0833	5.06254	6.94133	40.6384	62.782	78.1108	18.1252	86.3756	14.3993	9.28019	30.2587	0.102235	0.315998	1.62432	6.28995	23.948	0.536196	9.41562	12.2532	2.61235	4.89752	18.2247	0	0.167293	8.27674	0.0257374	0.157284
330614	1988	330614	193773	4.44842e+06	10013.2	1988	1989	1991	0	24	0	0	0	0	299.5	15.3115	0.965672	63.8436	7.15746	10.0344	2.3532	4.36928	7.48232	2.69972	6.81578	41.1207	63.8597	86.7155	11.5129	88.7472	14.8578	4.90841	30.15	0.0943706	0.291691	1.68723	6.19415	23.9144	0.521898	9.5729	12.2453	2.6624	4.84274	17.8143	0	0.154425	8.30605	0.0514749	0.164434
330614	1989	330614	193773	4.44842e+06	10013.2	1989	1989	1991	0	20	0	0	0	0	281.3	15.2419	1.03691	64.5581	6.72835	10.7612	0.612799	4.43243	2.8813	0.336908	6.69023	41.603	64.9374	95.3203	4.90057	91.1188	15.3163	0.536625	30.0413	0.0865064	0.267383	1.75015	6.09835	23.8808	0.507599	9.73019	12.2374	2.71244	4.78795	17.4039	0	0.141556	8.33536	0.0772123	0.171583
330614	1990	330614	193773	4.44842e+06	10013.2	1990	1989	1991	0	17	0	0	0	0	270.1	15.1722	1.10814	65.2726	6.29924	11.4881	0.599269	4.35053	2.98339	0.716598	6.69848	42.8059	65.0565	94.9217	5.42674	91.4542	15.8007	0.573147	29.9327	0.0786421	0.243076	1.81306	6.00254	23.8472	0.493301	9.88747	12.2296	2.76249	4.73317	16.9935	0	0.128687	8.36467	0.10295	0.178732
330614	1991	330614	193773	4.44842e+06	10013.2	1991	1989	1991	0	1	0	0	0	0	22	14.9986	1.04382	60.2533	11.5657	12.9197	0.58574	4.26863	3.08548	1.09629	6.70673	44.0088	65.1756	94.5231	5.95291	91.7895	16.2852	0.609669	29.824	0.0707779	0.218768	1.87597	5.90674	23.8136	0.479002	10.0448	12.2217	2.81253	4.67838	16.5831	0	0.115818	8.39398	0.128687	0.185881
330614	1992	330614	193773	4.44842e+06	10013.2	1992	1989	1991	0	0	0	0	0	0	0	14.8249	0.979506	55.2341	16.8321	14.3512	0.57221	4.18673	3.18757	1.47598	6.71498	45.2117	65.2946	94.1244	6.47908	92.1248	16.7696	0.646191	29.7153	0.0629137	0.194461	1.93889	5.81094	23.78	0.464704	10.202	12.2138	2.86258	4.62359	16.1727	0	0.10295	8.4233	0.154425	0.193031
330614	1993	330614	193773	4.44842e+06	10013.2	1993	1989	1991	0	0	0	0	0	0	0	14.6513	0.915189	50.2148	22.0986	15.7828	0.55868	4.10483	3.28965	1.85567	6.72323	46.4146	65.4137	93.7258	7.00525	92.4601	17.2541	0.682713	29.6066	0.0550495	0.170153	2.0018	5.71514	23.7464	0.450405	10.3593	12.206	2.91262	4.56881	15.7622	0	0.090081	8.45261	0.180162	0.20018
330614	1994	330614	193773	4.44842e+06	10013.2	1994	1989	1991	0	0	0	0	0	0	0	14.4776	0.850871	45.1956	27.365	17.2143	0.545151	4.02293	3.39174	2.23536	6.73148	47.6176	65.5328	93.3271	7.53142	92.7954	17.7385	0.719236	29.498	0.0471853	0.145845	2.06472	5.61934	23.7128	0.436106	10.5166	12.1981	2.96267	4.51402	15.3518	0	0.0772123	8.48192	0.205899	0.207329
330614	1995	330614	193773	4.44842e+06	10013.2	1995	1989	1991	1	0	0	0	0	0.7	0	14.304	0.786553	40.1763	32.6314	18.6459	0.531621	3.94103	3.49383	2.61505	6.73972	48.8205	65.6519	92.9285	8.05759	93.1307	18.223	0.755758	29.3893	0.0393211	0.121538	2.12763	5.52354	23.6792	0.421808	10.6739	12.1903	3.01271	4.45923	14.9414	0	0.0643436	8.51123	0.231637	0.214479
330614	1996	330614	193773	4.44842e+06	10013.2	1996	1999	2001	0	1	0	0	0	0	0.7	14.1303	0.722235	35.1571	37.8979	20.0775	0.518091	3.85913	3.59592	2.99474	6.74797	50.0234	65.7709	92.5298	8.58377	93.466	18.7074	0.79228	29.2806	0.0314569	0.0972303	2.19054	5.42774	23.6456	0.407509	10.8312	12.1824	3.06276	4.40445	14.531	0	0.0514749	8.54054	0.257374	0.221628
330614	1997	330614	193773	4.44842e+06	10013.2	1997	1999	2001	0	1	0	0	0	0	0.7	13.9566	0.657917	30.1379	43.1643	21.509	0.504562	3.77723	3.698	3.37443	6.75622	51.2263	65.89	92.1312	9.10994	93.8013	19.1919	0.828802	29.172	0.0235926	0.0729227	2.25346	5.33194	23.612	0.393211	10.9885	12.1745	3.1128	4.34966	14.1206	0	0.0386061	8.56986	0.283112	0.228777
330614	1998	330614	193773	4.44842e+06	10013.2	1998	1999	2001	0	1	0	0	0	0	0.7	13.783	0.5936	25.1186	48.4307	22.9406	0.491032	3.69533	3.80009	3.75412	6.76447	52.4292	66.0091	91.7325	9.63611	94.1366	19.6763	0.865324	29.0633	0.0157284	0.0486151	2.31637	5.23614	23.5784	0.378912	11.1457	12.1667	3.16285	4.29488	13.7102	0	0.0257374	8.59917	0.308849	0.235926
330614	1999	330614	193773	4.44842e+06	10013.2	1999	1999	2001	0	1	0	0	0	0	0.7	13.6093	0.529282	20.0994	53.6972	24.3721	0.477502	3.61343	3.90218	4.13381	6.77272	53.6321	66.1282	91.3339	10.1623	94.472	20.1608	0.901846	28.9546	0.00786421	0.0243076	2.37928	5.14034	23.5448	0.364614	11.303	12.1588	3.21289	4.24009	13.2998	0	0.0128687	8.62848	0.334587	0.243076
330614	2000	330614	193773	4.44842e+06	10013.2	2000	1999	2001	0	1	0	0	0	0	0.7	13.4357	0.464964	15.0801	58.9636	25.8037	0.956352	3.53786	4.6529	4.30198	7.85709	54.7796	59.7106	89.9366	10.1623	94.472	20.7275	0.901846	28.846	0	0	2.4422	5.04454	23.5112	0.350315	11.4603	12.1509	3.26294	4.1853	12.8893	0	0	8.65779	0.360324	0.250225
330614	2001	330614	193773	4.44842e+06	10013.2	2001	1999	2001	0	0	0	0	0	0	0	13.4357	0.464964	15.0801	58.9636	25.8037	1.4352	3.4623	5.40363	4.47016	8.94146	55.927	53.293	88.5392	10.1623	94.472	21.2942	0.901846	28.9127	0	0	2.41884	4.92276	23.6596	0.350315	11.4486	12.0125	3.3647	4.05411	12.9455	0	0	7.41051	0.30027	0.212804
330614	2002	330614	193773	4.44842e+06	10013.2	2002	1999	2001	0	0	0	0	0	0	0	13.4357	0.464964	15.0801	58.9636	25.8037	1.91405	3.38674	6.15435	4.63833	10.0258	57.0745	46.8754	87.1419	10.1623	94.472	21.861	0.901846	28.9794	0	0	2.39549	4.80099	23.8081	0.350315	11.437	11.874	3.46645	3.92292	13.0016	0	0	6.16323	0.240216	0.175383
330614	2003	330614	193773	4.44842e+06	10013.2	2003	1999	2001	0	0	0	0	0	0	0	13.4357	0.464964	15.0801	58.9636	25.8037	2.3929	3.31117	6.90508	4.80651	11.1102	58.222	40.4578	85.7446	10.1623	94.472	22.4277	0.901846	29.0461	0	0	2.37214	4.67921	23.9566	0.350315	11.4253	11.7356	3.56821	3.79173	13.0577	0	0	4.91595	0.180162	0.137962
330614	2004	330614	193773	4.44842e+06	10013.2	2004	1999	2001	0	0	0	0	0	0	0	13.4357	0.464964	15.0801	58.9636	25.8037	2.87175	3.23561	7.65581	4.97469	12.1946	59.3694	34.0403	84.3473	10.1623	94.472	22.9944	0.901846	29.1129	0	0	2.34878	4.55743	24.105	0.350315	11.4136	11.5971	3.66997	3.66054	13.1139	0	0	3.66867	0.120108	0.100541
330614	2005	330614	193773	4.44842e+06	10013.2	2005	1999	2001	0	0	0	0	0	0	0	13.4357	0.464964	15.0801	58.9636	25.8037	3.3506	3.16005	8.40653	5.14286	13.2789	60.5169	27.6227	82.9499	10.1623	94.472	23.5612	0.901846	29.1796	0	0	2.32543	4.43566	24.2535	0.350315	11.4019	11.4586	3.77173	3.52935	13.17	0	0	2.4214	0.060054	0.0631201
330614	2006	330614	193773	4.44842e+06	10013.2	2006	2009	2001	0	0	0	0	0	0	0	13.4357	0.464964	15.0801	58.9636	25.8037	3.82945	3.08448	9.15726	5.31104	14.3633	61.6643	21.2051	81.5526	10.1623	94.472	24.1279	0.901846	29.2463	0	0	2.30207	4.31388	24.402	0.350315	11.3903	11.3202	3.87349	3.39815	13.2261	0	0	1.17412	0	0.0256991
330614	2007	330614	193773	4.44842e+06	10013.2	2007	2009	2001	3	0	1	0	0	2.43	0	13.4357	0.464964	15.0801	58.9636	25.8037	4.3083	3.00892	9.90798	5.47922	15.4477	62.8118	14.7875	80.1553	10.1623	94.472	24.6947	0.901846	29.2463	0	0	2.30207	4.31388	24.402	0.350315	11.3903	11.3202	3.87349	3.39815	13.2261	0	0	1.17412	0	0.0256991
330614	2008	330614	193773	4.44842e+06	10013.2	2008	2009	2001	1	3	0	0	0	0.5	2.43	13.4357	0.464964	15.0801	58.9636	25.8037	5.266	2.85779	11.4094	5.81557	17.6164	65.1067	1.95233	77.3606	10.1623	94.472	25.8281	0.901846	29.2463	0	0	2.30207	4.31388	24.402	0.350315	11.3903	11.3202	3.87349	3.39815	13.2261	0	0	0	0	0
330615	1979	330615	193098	4.43844e+06	10012.6	1979	1972	1981	1	0	0	0	1	220	0	31.9421	0.987337	61.4611	6.36443	7.88844	9.058	4.8168	27.9743	30.7262	7.15612	47.9257	39.9624	31.454	47.3698	69.3861	19.6548	80.1798	11.0272	0.295059	0	1.75035	2.53551	49.1398	0	21.7043	11.7774	1.54531	13.3107	14.472	0.157	0.615123	29.2559	0.290058	0.690138
330615	1980	330615	193098	4.43844e+06	10012.6	1980	1982	1981	4	1	0	3	0	150.1	220	31.8726	0.987337	61.4611	6.36443	7.88844	9.595	4.78978	26.2465	34.1979	7.14587	47.9548	40.1737	29.3847	47.3698	69.3861	19.6548	80.1798	10.9822	0.308633	0	1.66891	2.34761	48.5869	0	21.9215	12.161	1.76607	13.3857	15.0844	0.154	0.702998	26.3324	0.301489	0.788729
330615	1981	330615	193098	4.43844e+06	10012.6	1981	1982	1981	0	5	0	0	0	0	370.1	31.9612	1.12831	60.1875	6.47704	8.96762	10.132	4.76275	24.5187	37.6696	7.13562	47.984	40.3851	27.3155	47.3698	69.3861	19.6548	80.1798	10.9372	0.322207	0	1.58746	2.15972	48.0339	0	22.1387	12.5447	1.98683	13.4607	15.6968	0.151	0.790872	23.409	0.31292	0.88732
330615	1982	330615	193098	4.43844e+06	10012.6	1982	1982	1981	0	5	0	0	0	0	370.1	32.0498	1.26928	58.914	6.58965	10.0468	10.668	4.73573	22.7909	41.1412	7.12538	48.0132	40.5965	25.2462	47.3698	69.3861	19.6548	80.1798	10.8922	0.335781	0	1.50602	1.97182	47.4809	0	22.3559	12.9283	2.20758	13.5357	16.3092	0.148	0.878747	20.4855	0.324351	0.985911
330615	1983	330615	193098	4.43844e+06	10012.6	1983	1982	1981	0	5	0	0	0	0	370.1	32.1384	1.41026	57.6404	6.70227	11.126	9.589	4.70665	22.4047	35.6677	6.86181	47.0175	41.516	31.9652	43.7031	73.5755	19.9359	68.9331	10.8472	0.349356	0	1.42457	1.78393	46.928	0	22.5731	13.3119	2.42834	13.6107	16.9216	0.145	0.966622	17.5621	0.335781	1.0845
330615	1984	330615	193098	4.43844e+06	10012.6	1984	1982	1981	3	5	0	1	2	855	370.1	32.227	1.55123	56.3669	6.81488	12.2051	8.51029	4.67756	22.0185	30.1941	6.59823	46.0218	42.4355	38.6841	40.0365	77.7648	20.2171	57.6864	10.8022	0.36293	0	1.34313	1.59603	46.375	0	22.7903	13.6956	2.6491	13.6857	17.534	0.142	1.0545	14.6386	0.347212	1.18309
330615	1985	330615	193098	4.43844e+06	10012.6	1985	1982	1981	2	7	0	1	1	300	1005.1	32.3156	1.69221	55.0933	6.9275	13.2843	7.43141	4.64847	21.6323	24.7205	6.33466	45.026	43.3551	45.4031	36.3699	81.9542	20.4982	46.4397	10.7572	0.376504	0	1.26168	1.40814	45.822	0	23.0075	14.0792	2.86986	13.7608	18.1464	0.139	1.14237	11.7152	0.358643	1.28168
330615	1986	330615	193098	4.43844e+06	10012.6	1986	1989	1991	0	5	0	0	0	0	1155	32.4042	1.83318	53.8198	7.04011	14.3635	6.35253	4.61939	21.2461	19.2469	6.07109	44.0303	44.2746	52.122	32.7033	86.1435	20.7793	35.193	10.7121	0.390078	0	1.18024	1.22024	45.2691	0	23.2246	14.4629	3.09062	13.8358	18.7588	0.13	1.23025	8.79176	0.370074	1.38028
330615	1987	330615	193098	4.43844e+06	10012.6	1987	1989	1991	1	5	0	1	0	15	1155	32.4928	1.97415	52.5462	7.15273	15.4426	5.27365	4.5903	20.8599	13.7733	5.80752	43.0346	45.1941	58.841	29.0366	90.3329	21.0604	23.9463	10.5764	0.405081	0	1.22453	1.20095	44.8318	0	23.4254	14.8651	3.04704	13.6518	18.816	0.128	1.14237	8.48384	0.34364	1.3617
330615	1988	330615	193098	4.43844e+06	10012.6	1988	1989	1991	0	6	0	0	0	0	1170	32.5814	2.11513	51.2727	7.26534	16.5218	4.19477	4.56121	20.4737	8.29974	5.54395	42.0389	46.1136	65.5599	25.37	94.5222	21.3416	12.6997	10.4407	0.420084	0	1.26883	1.18166	44.3946	0	23.6262	15.2673	3.00346	13.4678	18.8731	0.188	1.0545	8.17592	0.317206	1.34313
330615	1989	330615	193098	4.43844e+06	10012.6	1989	1989	1991	3	6	2	0	0	8	1170	32.67	2.2561	49.9991	7.37796	17.601	3.11589	4.53213	20.0875	2.82616	5.28038	41.0432	47.0331	72.2789	21.7034	98.7116	21.6227	1.45298	10.3049	0.435087	0	1.31312	1.16238	43.9574	0	23.8269	15.6696	2.95988	13.2839	18.9303	0.187	0.966622	7.868	0.290772	1.32455
330615	1990	330615	193098	4.43844e+06	10012.6	1990	1989	1991	0	6	0	0	0	0	323	32.7586	2.39708	48.7256	7.49057	18.6802	2.93126	4.46427	20.7544	3.08803	5.97043	41.7438	46.9275	71.6886	22.2981	97.8479	23.6928	1.55591	10.1692	0.45009	0	1.35741	1.14309	43.5201	0	24.0277	16.0718	2.9163	13.0999	18.9874	0.185	0.878747	7.56008	0.264339	1.30598
330615	1991	330615	193098	4.43844e+06	10012.6	1991	1989	1991	0	4	0	0	0	0	23	32.8039	2.33183	45.9977	12.5224	18.8712	2.74662	4.3964	21.4212	3.34989	6.66049	42.4444	46.8219	71.0983	22.8928	96.9842	25.7628	1.65884	10.0334	0.465093	0	1.40171	1.1238	43.0829	0	24.2284	16.474	2.87272	12.9159	19.0446	0.184	0.790872	7.25216	0.237905	1.2874
330615	1992	330615	193098	4.43844e+06	10012.6	1992	1989	1991	2	4	1	0	0	5	23	32.8493	2.26658	43.2698	17.5543	19.0623	2.56198	4.32854	22.088	3.61176	7.35055	43.1449	46.7162	70.5081	23.4875	96.1205	27.8329	1.76177	9.89769	0.480096	0	1.446	1.10451	42.6457	0	24.4292	16.8762	2.82914	12.732	19.1018	0.183	0.702998	6.94425	0.211471	1.26883
330615	1993	330615	193098	4.43844e+06	10012.6	1993	1989	1991	4	5	2	0	0	6.5	13	32.8946	2.20133	40.5419	22.5861	19.2533	2.37734	4.26068	22.7548	3.87363	8.04061	43.8455	46.6106	69.9178	24.0823	95.2568	29.903	1.8647	9.76195	0.495099	0	1.4903	1.08522	42.2084	0	24.6299	17.2785	2.78556	12.548	19.1589	0.181	0.615123	6.63633	0.185037	1.25025
330615	1994	330615	193098	4.43844e+06	10012.6	1994	1989	1991	9	9	5	1	0	34.5	19.5	32.9399	2.13609	37.814	27.618	19.4444	2.19271	4.19282	23.4217	4.13549	8.73066	44.5461	46.505	69.3275	24.677	94.3931	31.9731	1.96763	9.62621	0.510102	0	1.53459	1.06593	41.7712	0	24.8307	17.6807	2.74198	12.364	19.2161	0.18	0.527248	6.32841	0.158603	1.23167
330615	1995	330615	193098	4.43844e+06	10012.6	1995	1989	1991	9	15	4	0	1	135.9	46	32.9852	2.07084	35.0861	32.6498	19.6354	2.00807	4.12496	24.0885	4.39736	9.42072	45.2467	46.3993	68.7373	25.2717	93.5294	34.0432	2.07056	9.49047	0.525105	0	1.57889	1.04664	41.334	0	25.0314	18.0829	2.6984	12.18	19.2733	0.178	0.439374	6.02049	0.132169	1.2131
330615	1996	330615	193098	4.43844e+06	10012.6	1996	1999	2001	0	24	0	0	0	0	181.9	33.0306	2.00559	32.3582	37.6817	19.8265	1.82343	4.0571	24.7553	4.65923	10.1108	45.9472	46.2937	68.147	25.8664	92.6657	36.1133	2.17349	9.35473	0.540108	0	1.62318	1.02735	40.8968	0	25.2322	18.4851	2.65482	11.9961	19.3304	0.177	0.351499	5.71257	0.105735	1.19452
330615	1997	330615	193098	4.43844e+06	10012.6	1997	1999	2001	0	24	0	0	0	0	181.9	33.0759	1.94035	29.6303	42.7135	20.0176	1.6388	3.98923	25.4222	4.92109	10.8008	46.6478	46.1881	67.5567	26.4611	91.8021	38.1834	2.27642	9.21899	0.555111	0	1.66748	1.00806	40.4595	0	25.4329	18.8873	2.61124	11.8121	19.3876	0.175	0.263624	5.40465	0.0793016	1.17595
330615	1998	330615	193098	4.43844e+06	10012.6	1998	1999	2001	0	22	0	0	0	0	176.9	33.1212	1.8751	26.9024	47.7453	20.2086	1.45416	3.92137	26.089	5.18296	11.4909	47.3484	46.0824	66.9665	27.0558	90.9384	40.2534	2.37935	9.08324	0.570114	0	1.71177	0.988769	40.0223	0	25.6337	19.2896	2.56766	11.6281	19.4448	0.174	0.175749	5.09673	0.0528677	1.15737
330615	1999	330615	193098	4.43844e+06	10012.6	1999	1999	2001	0	18	0	0	0	0	170.4	33.1665	1.80985	24.1745	52.7772	20.3997	1.26952	3.85351	26.7558	5.44483	12.181	48.049	45.9768	66.3762	27.6505	90.0747	42.3235	2.48228	8.9475	0.585117	0	1.75607	0.96948	39.5851	0	25.8345	19.6918	2.52408	11.4442	19.5019	0.173	0.0878747	4.78881	0.0264339	1.1388
330615	2000	330615	193098	4.43844e+06	10012.6	2000	1999	2001	2	9	0	0	0	1.5	135.9	33.2119	1.74461	21.4466	57.809	20.5907	1.60729	3.68783	26.7524	5.56433	13.4087	49.2753	41.8085	65.923	27.6505	90.0747	42.153	2.48228	8.81176	0.60012	0	1.80036	0.95019	39.1478	0	26.0352	20.094	2.4805	11.2602	19.5591	0.19	0	4.4809	0	1.12022
330615	2001	330615	193098	4.43844e+06	10012.6	2001	1999	2001	1	2	1	0	0	6	1.5	33.2119	1.74461	21.4466	57.809	20.5907	1.94506	3.52216	26.7491	5.68384	14.6364	50.5015	37.6403	65.4697	27.6505	90.0747	41.9825	2.48228	8.72508	0.60012	0	1.80036	0.885177	39.1962	0	25.9869	20.094	2.63219	11.2868	19.7052	0.19	0	3.85444	0	0.93352
330615	2002	330615	193098	4.43844e+06	10012.6	2002	1999	2001	1	3	0	0	0	1	7.5	33.2119	1.74461	21.4466	57.809	20.5907	2.28283	3.35648	26.7457	5.80335	15.8642	51.7278	33.4721	65.0165	27.6505	90.0747	41.812	2.48228	8.63839	0.60012	0	1.80036	0.820164	39.2445	0	25.9385	20.094	2.78389	11.3134	19.8513	0.19	0	3.22799	0	0.746816
330615	2003	330615	193098	4.43844e+06	10012.6	2003	1999	2001	1	4	1	0	0	4	8.5	33.2119	1.74461	21.4466	57.809	20.5907	2.6206	3.1908	26.7423	5.92285	17.0919	52.9541	29.3038	64.5632	27.6505	90.0747	41.6414	2.48228	8.55171	0.60012	0	1.80036	0.755151	39.2929	0	25.8902	20.094	2.93559	11.34	19.9974	0.19	0	2.60154	0	0.560112
330615	2004	330615	193098	4.43844e+06	10012.6	2004	1999	2001	2	5	1	0	0	6	12.5	33.2119	1.74461	21.4466	57.809	20.5907	2.95837	3.02513	26.7389	6.04236	18.3196	54.1804	25.1356	64.11	27.6505	90.0747	41.4709	2.48228	8.46503	0.60012	0	1.80036	0.690138	39.3412	0	25.8418	20.094	3.08728	11.3666	20.1436	0.19	0	1.97509	0	0.373408
330615	2005	330615	193098	4.43844e+06	10012.6	2005	1999	2001	1	7	0	0	0	1	18.5	33.2119	1.74461	21.4466	57.809	20.5907	3.29614	2.85945	26.7355	6.16186	19.5474	55.4066	20.9674	63.6567	27.6505	90.0747	41.3004	2.48228	8.37834	0.60012	0	1.80036	0.625125	39.3895	0	25.7935	20.094	3.23898	11.3932	20.2897	0.19	0	1.34864	0	0.186704
330615	2006	330615	193098	4.43844e+06	10012.6	2006	2009	2001	17	6	6	0	0	32.96	18	33.2119	1.74461	21.4466	57.809	20.5907	3.63391	2.69377	26.7321	6.28137	20.7751	56.6329	16.7991	63.2035	27.6505	90.0747	41.1299	2.48228	8.29166	0.60012	0	1.80036	0.560112	39.4379	0	25.7451	20.094	3.39068	11.4198	20.4358	0.19	0	0.722185	0	0
330615	2007	330615	193098	4.43844e+06	10012.6	2007	2009	2001	4	22	3	0	0	11.15	44.96	33.2119	1.74461	21.4466	57.809	20.5907	3.97167	2.5281	26.7287	6.40088	22.0029	57.8592	12.6309	62.7502	27.6505	90.0747	40.9594	2.48228	8.29166	0.60012	0	1.80036	0.560112	39.4379	0	25.7451	20.094	3.39068	11.4198	20.4358	0.19	0	0.722185	0	0
330615	2008	330615	193098	4.43844e+06	10012.6	2008	2009	2001	5	25	1	0	0	4.03	55.11	33.2119	1.74461	21.4466	57.809	20.5907	4.64721	2.19674	26.7219	6.63989	24.4583	60.3117	4.29441	61.8437	27.6505	90.0747	40.6183	2.48228	8.29166	0.60012	0	1.80036	0.560112	39.4379	0	25.7451	20.094	3.39068	11.4198	20.4358	0.19	0	0.095733	0	0
330703	1979	330703	211258	4557542	10009.3	1979	1972	1981	0	0	0	0	0	0	0	3.69837	0.019833	83.6039	4.81909	0.414688	0.001	1.85517	38.0125	12.2712	39.3355	51.7943	15.368	49.2951	61.3371	3.91746	27.6465	32.5907	57.0492	0.035021	0	0	0.585351	11.2117	0	11.657	19.2566	0.205123	4.28829	28.8739	0.182	0	21.4729	0	0
330703	1980	330703	211258	4557542	10009.3	1980	1982	1981	0	0	0	0	0	0	0	3.51788	0.019833	83.6039	4.81909	0.414688	0.001	1.80714	39.31	14.0242	40.5233	52.5947	16.2587	46.3426	61.3371	3.91746	27.6465	32.5907	57.4845	0.040024	0	0	0.62466	10.8894	0	11.6041	19.1229	0.234426	4.12215	29.4237	0.194	0	18.8127	0	0
330703	1981	330703	211258	4557542	10009.3	1981	1982	1981	0	0	0	0	0	0	0	3.44491	0.0369031	80.9132	4.69536	1.25869	0	1.75912	40.6075	15.7772	41.7111	53.3952	17.1495	43.3902	61.3371	3.91746	27.6465	32.5907	57.9198	0.045027	0	0	0.66397	10.5671	0	11.5512	18.9893	0.26373	3.95601	29.9734	0.206	0	16.1525	0	0
330703	1982	330703	211258	4557542	10009.3	1982	1982	1981	0	0	0	0	0	0	0	3.37193	0.0539732	78.2225	4.57162	2.1027	0	1.71109	41.9051	17.5302	42.8989	54.1956	18.0403	40.4378	61.3371	3.91746	27.6465	32.5907	58.355	0.05003	0	0	0.703279	10.2447	0	11.4983	18.8556	0.293033	3.78987	30.5232	0.218	0	13.4924	0	0
330703	1983	330703	211258	4557542	10009.3	1983	1982	1981	0	0	0	0	0	0	0	3.29895	0.0710433	75.5318	4.44789	2.9467	0	1.64717	40.7825	15.4066	44.343	52.4845	16.0666	43.5121	62.7409	17.52	27.9414	28.141	58.7903	0.055033	0	0	0.742588	9.92238	0	11.4454	18.7219	0.322336	3.62373	31.073	0.23	0	10.8322	0	0
330703	1984	330703	211258	4557542	10009.3	1984	1982	1981	0	0	0	0	0	0	0	3.22598	0.0881134	72.841	4.32416	3.79071	0	1.58324	39.6599	13.2829	45.787	50.7735	14.0928	46.5865	64.1447	31.1225	28.2362	23.6912	59.2255	0.060036	0	0	0.781897	9.60005	0	11.3925	18.5883	0.351639	3.45759	31.6228	0.242	0	8.17205	0	0
330703	1985	330703	211258	4557542	10009.3	1985	1982	1981	1	0	0	0	1	3376	0	3.153	0.105183	70.1503	4.20043	4.63471	0	1.51932	38.5374	11.1593	47.2311	49.0624	12.1191	49.6608	65.5485	44.7251	28.531	19.2415	59.6608	0.065039	0	0	0.821207	9.27771	0	11.3397	18.4546	0.380943	3.29146	32.1726	0.254	0	5.51188	0	0
330703	1986	330703	211258	4557542	10009.3	1986	1989	1991	0	1	0	0	0	0	3376	3.08002	0.122254	67.4596	4.0767	5.47872	0	1.4554	37.4148	9.03564	48.6751	47.3513	10.1453	52.7351	66.9523	58.3276	28.8258	14.7918	60.0961	0.070042	0	0	0.860516	8.95537	0	11.2868	18.321	0.410246	3.12532	32.7224	0.29	0	2.85171	0	0
330703	1987	330703	211258	4557542	10009.3	1987	1989	1991	1	1	0	1	0	40	3376	3.00705	0.139324	64.7689	3.95296	6.32272	0	1.39148	36.2922	6.91199	50.1192	45.6403	8.17154	55.8095	68.3561	71.9302	29.1207	10.342	58.7931	0.065039	0	0	2.23563	9.26913	0	11.4326	17.2818	0.922696	3.22038	32.164	0.288	0.0185826	3.36416	0	0.16224
330703	1988	330703	211258	4557542	10009.3	1988	1989	1991	0	2	0	0	0	0	3416	2.93407	0.156394	62.0782	3.82923	7.16673	0	1.32755	35.1696	4.78835	51.5633	43.9292	6.19778	58.8838	69.76	85.5327	29.4155	5.89227	57.4902	0.060036	0	0	3.61074	9.58289	0	11.5784	16.2426	1.43515	3.31543	31.6055	0.258	0.0371651	3.87661	0	0.32448
330703	1989	330703	211258	4557542	10009.3	1989	1989	1991	1	2	0	1	0	50	3416	2.86109	0.173464	59.3875	3.7055	8.01073	0	1.26363	34.047	2.6647	53.0073	42.2182	4.22402	61.9581	71.1638	99.1352	29.7103	1.44252	56.1873	0.055033	0	0	4.98585	9.89665	0	11.7242	15.2034	1.9476	3.41049	31.0471	0.257	0.0557477	4.38906	0	0.486721
330703	1990	330703	211258	4557542	10009.3	1990	1989	1991	2	3	1	1	0	41.5	3466	2.78812	0.190534	56.6968	3.58177	8.85474	0.0550937	1.25282	36.0124	2.95648	53.3992	41.8656	4.23696	59.7667	70.3778	96.8818	31.5015	1.38005	54.8844	0.05003	0	0	6.36096	10.2104	0	11.87	14.1642	2.46005	3.50555	30.4887	0.255	0.0743303	4.90151	0	0.648961
330703	1991	330703	211258	4557542	10009.3	1991	1989	1991	0	4	0	0	0	0	131.5	2.7029	0.179102	53.7642	7.73022	10.7128	0.110187	1.242	37.9778	3.24825	53.7911	41.5131	4.24989	57.5753	69.5919	94.6284	33.2928	1.31757	53.5814	0.045027	0	0	7.73607	10.5242	0	12.0158	13.125	2.9725	3.60061	29.9303	0.254	0.0929129	5.41396	0	0.811201
330703	1992	330703	211258	4557542	10009.3	1992	1989	1991	0	4	0	0	0	0	131.5	2.61767	0.167671	50.8317	11.8787	12.5709	0.165281	1.23119	39.9432	3.54002	54.183	41.1606	4.26283	55.3839	68.8059	92.375	35.084	1.2551	52.2785	0.040024	0	0	9.11118	10.8379	0	12.1616	12.0858	3.48495	3.69567	29.3718	0.253	0.111495	5.92641	0	0.973441
330703	1993	330703	211258	4557542	10009.3	1993	1989	1991	0	3	0	0	0	0	91.5	2.53245	0.15624	47.8992	16.0271	14.4289	0.220375	1.22037	41.9086	3.83179	54.5749	40.8081	4.27576	53.1925	68.02	90.1216	36.8752	1.19262	50.9756	0.035021	0	0	10.4863	11.1517	0	12.3074	11.0466	3.9974	3.79073	28.8134	0.251	0.130078	6.43886	0	1.13568
330703	1994	330703	211258	4557542	10009.3	1994	1989	1991	0	3	0	0	0	0	91.5	2.44723	0.144808	44.9667	20.1756	16.287	0.275468	1.20956	43.874	4.12356	54.9669	40.4556	4.2887	51.0011	67.234	87.8682	38.6664	1.13015	49.6727	0.030018	0	0	11.8614	11.4655	0	12.4532	10.0074	4.50985	3.88579	28.255	0.25	0.148661	6.95131	0	1.29792
330703	1995	330703	211258	4557542	10009.3	1995	1989	1991	0	2	0	0	0	0	41.5	2.36201	0.133377	42.0341	24.324	18.145	0.330562	1.19874	45.8394	4.41534	55.3588	40.103	4.30163	48.8097	66.4481	85.6148	40.4576	1.06767	48.3697	0.025015	0	0	13.2365	11.7792	0	12.599	8.96824	5.0223	3.98085	27.6966	0.248	0.167243	7.46376	0	1.46016
330703	1996	330703	211258	4557542	10009.3	1996	1999	2001	0	0	0	0	0	0	0	2.27679	0.121945	39.1016	28.4725	20.0031	0.385656	1.18793	47.8047	4.70711	55.7507	39.7505	4.31457	46.6183	65.6621	83.3614	42.2488	1.0052	47.0668	0.020012	0	0	14.6116	12.093	0	12.7448	7.92904	5.53475	4.0759	27.1381	0.247	0.185826	7.97621	0	1.6224
330703	1997	330703	211258	4557542	10009.3	1997	1999	2001	0	0	0	0	0	0	0	2.19157	0.110514	36.1691	32.621	21.8611	0.440749	1.17711	49.7701	4.99888	56.1426	39.398	4.3275	44.4268	64.8762	81.108	44.04	0.942725	45.7639	0.015009	0	0	15.9867	12.4067	0	12.8906	6.88985	6.0472	4.17096	26.5797	0.245	0.204408	8.48866	0	1.78464
330703	1998	330703	211258	4557542	10009.3	1998	1999	2001	1	0	0	0	0	1	0	2.10634	0.099082	33.2365	36.7694	23.7192	0.495843	1.1663	51.7355	5.29065	56.5345	39.0455	4.34044	42.2354	64.0902	78.8546	45.8312	0.88025	44.461	0.010006	0	0	17.3618	12.7205	0	13.0364	5.85065	6.55965	4.26602	26.0213	0.244	0.222991	9.00112	0	1.94688
330703	1999	330703	211258	4557542	10009.3	1999	1999	2001	1	1	0	0	0	0.06	1	2.02112	0.0876505	30.304	40.9179	25.5772	0.550937	1.15548	53.7009	5.58242	56.9264	38.693	4.35337	40.044	63.3043	76.6012	47.6225	0.817775	43.158	0.005003	0	0	18.737	13.0342	0	13.1822	4.81146	7.0721	4.36108	25.4629	0.243	0.241573	9.51357	0	2.10912
330703	2000	330703	211258	4557542	10009.3	2000	1999	2001	0	2	0	0	0	0	1.06	1.9359	0.076219	27.3715	45.0663	27.4353	1.07812	1.1168	53.1425	5.95998	58.7335	38.8193	4.36926	39.6992	63.3043	76.6012	47.9318	0.817775	41.8551	0	0	0	20.1121	13.348	0	13.328	3.77226	7.58455	4.45614	24.9044	0.26	0.260156	10.026	0	2.27136
330703	2001	330703	211258	4557542	10009.3	2001	1999	2001	0	2	0	0	0	0	1.06	1.9359	0.076219	27.3715	45.0663	27.4353	1.60531	1.07813	52.584	6.33753	60.5406	38.9456	4.38514	39.3543	63.3043	76.6012	48.2411	0.817775	41.8518	0	0	0	20.1121	13.3513	0	13.328	3.77226	7.58455	4.45729	24.9006	0.26	0.216797	8.35501	0	1.8928
330703	2002	330703	211258	4557542	10009.3	2002	1999	2001	0	2	0	0	0	0	1.06	1.9359	0.076219	27.3715	45.0663	27.4353	2.1325	1.03945	52.0256	6.71509	62.3477	39.0719	4.40102	39.0095	63.3043	76.6012	48.5504	0.817775	41.8484	0	0	0	20.1121	13.3547	0	13.328	3.77226	7.58455	4.45845	24.8967	0.26	0.173437	6.68401	0	1.51424
330703	2003	330703	211258	4557542	10009.3	2003	1999	2001	0	2	0	0	0	0	1.06	1.9359	0.076219	27.3715	45.0663	27.4353	2.65968	1.00077	51.4672	7.09264	64.1548	39.1983	4.41691	38.6647	63.3043	76.6012	48.8597	0.817775	41.8451	0	0	0	20.1121	13.358	0	13.328	3.77226	7.58455	4.4596	24.8928	0.26	0.130078	5.01301	0	1.13568
330703	2004	330703	211258	4557542	10009.3	2004	1999	2001	0	1	0	0	0	0	0.06	1.9359	0.076219	27.3715	45.0663	27.4353	3.18687	0.962094	50.9088	7.47019	65.9619	39.3246	4.43279	38.3198	63.3043	76.6012	49.169	0.817775	41.8418	0	0	0	20.1121	13.3614	0	13.328	3.77226	7.58455	4.46076	24.8889	0.26	0.0867187	3.34201	0	0.757121
330703	2005	330703	211258	4557542	10009.3	2005	1999	2001	0	0	0	0	0	0	0	1.9359	0.076219	27.3715	45.0663	27.4353	3.71406	0.923416	50.3503	7.84775	67.769	39.4509	4.44868	37.975	63.3043	76.6012	49.4783	0.817775	41.8384	0	0	0	20.1121	13.3647	0	13.328	3.77226	7.58455	4.46191	24.8851	0.26	0.0433593	1.671	0	0.37856
330703	2006	330703	211258	4557542	10009.3	2006	2009	2001	0	0	0	0	0	0	0	1.9359	0.076219	27.3715	45.0663	27.4353	4.24124	0.884738	49.7919	8.2253	69.5761	39.5773	4.46456	37.6302	63.3043	76.6012	49.7876	0.817775	41.8351	0	0	0	20.1121	13.368	0	13.328	3.77226	7.58455	4.46307	24.8812	0.26	0	0	0	0
330703	2007	330703	211258	4557542	10009.3	2007	2009	2001	0	0	0	0	0	0	0	1.9359	0.076219	27.3715	45.0663	27.4353	4.76843	0.846061	49.2335	8.60286	71.3832	39.7036	4.48044	37.2853	63.3043	76.6012	50.0969	0.817775	41.8351	0	0	0	20.1121	13.368	0	13.328	3.77226	7.58455	4.46307	24.8812	0.26	0	0	0	0
330703	2008	330703	211258	4557542	10009.3	2008	2009	2001	0	0	0	0	0	0	0	1.9359	0.076219	27.3715	45.0663	27.4353	5.8228	0.768705	48.1166	9.35796	74.9974	39.9563	4.51221	36.5956	63.3043	76.6012	50.7155	0.817775	41.8351	0	0	0	20.1121	13.368	0	13.328	3.77226	7.58455	4.46307	24.8812	0.26	0	0	0	0
330704	1979	330704	210570	4.54756e+06	10009.3	1979	1972	1981	0	0	0	0	0	0	0	4.83791	0.620256	47.3098	9.4453	7.53154	0	2.45493	35.5828	5.39357	23.6966	44.0641	27.0366	58.5912	57.7692	72.2475	40.3521	29.7863	17.0934	0.560112	0	0	0.60012	36.7974	0	31.8414	12.8126	0.275055	9.7733	14.4897	0.018	0.245049	9.73195	0.45009	0
330704	1980	330704	210570	4.54756e+06	10009.3	1980	1982	1981	0	0	0	0	0	0	0	4.71379	0.620256	47.3098	9.4453	7.53154	0	2.35487	37.7477	6.10619	25.2636	44.2393	28.0792	55.8152	57.7692	72.2475	40.3521	29.7863	17.655	0.567256	0	0	0.514389	35.2842	0	33.1266	12.5154	0.314349	9.29163	14.5273	0.016	0.280056	8.82748	0.454377	0
330704	1981	330704	210570	4.54756e+06	10009.3	1981	1982	1981	0	0	0	0	0	0	0	4.69727	0.722051	46.1376	9.51473	8.09039	0	2.25482	39.9126	6.8188	26.8305	44.4145	29.1218	53.0392	57.7692	72.2475	40.3521	29.7863	18.2165	0.574401	0	0	0.428657	33.771	0	34.4119	12.2182	0.353642	8.80995	14.565	0.014	0.315063	7.92301	0.458663	0
330704	1982	330704	210570	4.54756e+06	10009.3	1982	1982	1981	0	0	0	0	0	0	0	4.68075	0.823846	44.9653	9.58416	8.64924	0	2.15476	42.0775	7.53141	28.3975	44.5898	30.1644	50.2632	57.7692	72.2475	40.3521	29.7863	18.778	0.581545	0	0	0.342926	32.2579	0	35.6971	11.921	0.392936	8.32827	14.6027	0.012	0.35007	7.01855	0.46295	0
330704	1983	330704	210570	4.54756e+06	10009.3	1983	1982	1981	0	0	0	0	0	0	0	4.66422	0.925641	43.793	9.65358	9.20809	0	2.04887	41.8413	6.80562	29.8257	45.3403	27.8802	51.0044	58.9778	76.0878	39.544	25.7003	19.3396	0.588689	0	0	0.257194	30.7447	0	36.9824	11.6238	0.432229	7.84659	14.6404	0.01	0.385077	6.11408	0.467236	0
330704	1984	330704	210570	4.54756e+06	10009.3	1984	1982	1981	0	0	0	0	0	0	0	4.6477	1.02744	42.6208	9.72301	9.76694	0	1.94299	41.6051	6.07982	31.2538	46.0909	25.5961	51.7457	60.1863	79.9281	38.7359	21.6143	19.9011	0.595833	0	0	0.171463	29.2316	0	38.2677	11.3266	0.471523	7.36492	14.6781	0.008	0.420084	5.20961	0.471523	0
330704	1985	330704	210570	4.54756e+06	10009.3	1985	1982	1981	1	0	0	0	0	1	0	4.63118	1.12923	41.4485	9.79244	10.3258	0	1.8371	41.3689	5.35402	32.682	46.8414	23.3119	52.4869	61.3948	83.7684	37.9278	17.5283	20.4627	0.602978	0	0	0.0857314	27.7184	0	39.5529	11.0293	0.510816	6.88324	14.7157	0.006	0.455091	4.30515	0.475809	0
330704	1986	330704	210570	4.54756e+06	10009.3	1986	1989	1991	0	1	0	0	0	0	1	4.61466	1.23103	40.2763	9.86186	10.8846	0	1.73121	41.1327	4.62823	34.1101	47.592	21.0278	53.2282	62.6033	87.6087	37.1197	13.4423	21.0242	0.610122	0	0	0	26.2052	0	40.8382	10.7321	0.55011	6.40156	14.7534	0	0.490098	3.40068	0.480096	0
330704	1987	330704	210570	4.54756e+06	10009.3	1987	1989	1991	0	1	0	0	0	0	1	4.59814	1.33282	39.104	9.93129	11.4435	0	1.62532	40.8965	3.90243	35.5382	48.3425	18.7436	53.9694	63.8118	91.449	36.3116	9.35634	20.2869	0.58726	0	0	0.0321493	28.2349	0	38.8392	11.3108	0.554397	7.15371	14.2894	0	0.455091	5.59612	0.484383	0
330704	1988	330704	210570	4.54756e+06	10009.3	1988	1989	1991	0	1	0	0	0	0	1	4.58161	1.43462	37.9318	10.0007	12.0024	0	1.51943	40.6603	3.17663	36.9664	49.0931	16.4595	54.7107	65.0203	95.2893	35.5034	5.27034	19.5496	0.564399	0	0	0.0642986	30.2646	0	36.8402	11.8895	0.558683	7.90587	13.8253	0.098	0.420084	7.79156	0.488669	0
330704	1989	330704	210570	4.54756e+06	10009.3	1989	1989	1991	0	1	0	0	0	0	1	4.56509	1.53641	36.7595	10.0701	12.5612	0	1.41354	40.4241	2.45084	38.3945	49.8436	14.1753	55.452	66.2288	99.1296	34.6953	1.18434	18.8123	0.541537	0	0	0.0964479	32.2943	0	34.8413	12.4682	0.56297	8.65802	13.3613	0.097	0.385077	9.987	0.492956	0
330704	1990	330704	210570	4.54756e+06	10009.3	1990	1989	1991	0	1	0	0	0	0	1	4.54857	1.6382	35.5872	10.1396	13.1201	0	1.4407	40.633	2.81546	38.4875	48.9791	15.3655	55.033	64.0657	97.7261	36.8976	1.14811	18.075	0.518675	0	0	0.128597	34.324	0	32.8423	13.0469	0.567256	9.41017	12.8972	0.096	0.35007	12.1824	0.497242	0
330704	1991	330704	210570	4.54756e+06	10009.3	1991	1989	1991	1	0	0	1	0	20	0	4.47501	1.61919	35.9387	12.2786	14.7321	0	1.46785	40.8418	3.18008	38.5805	48.1147	16.5556	54.6141	61.9025	96.3225	39.0999	1.11189	17.3378	0.495813	0	0	0.160746	36.3537	0	30.8433	13.6256	0.571543	10.1623	12.4332	0.094	0.315063	14.3779	0.501529	0
330704	1992	330704	210570	4.54756e+06	10009.3	1992	1989	1991	0	1	0	0	0	0	20	4.40144	1.60018	36.2902	14.4176	16.3441	0	1.49501	41.0507	3.5447	38.6735	47.2502	17.7457	54.1951	59.7394	94.919	41.3022	1.07566	16.6005	0.472952	0	0	0.192896	38.3834	0	28.8443	14.2043	0.575829	10.9145	11.9691	0.093	0.280056	16.5733	0.505815	0
330704	1993	330704	210570	4.54756e+06	10009.3	1993	1989	1991	0	1	0	0	0	0	20	4.32788	1.58117	36.6417	16.5566	17.9562	0	1.52216	41.2596	3.90933	38.7665	46.3857	18.9359	53.7761	57.5763	93.5154	43.5045	1.03944	15.8632	0.45009	0	0	0.225045	40.4131	0	26.8454	14.783	0.580116	11.6666	11.5051	0.091	0.245049	18.7688	0.510102	0
330704	1994	330704	210570	4.54756e+06	10009.3	1994	1989	1991	2	1	1	0	0	3.3	20	4.25432	1.56216	36.9932	18.6956	19.5682	0	1.54931	41.4684	4.27395	38.8595	45.5212	20.126	53.3572	55.4131	92.1119	45.7068	1.00321	15.1259	0.427228	0	0	0.257194	42.4428	0	24.8464	15.3616	0.584403	12.4188	11.0411	0.09	0.210042	20.9642	0.514389	0
330704	1995	330704	210570	4.54756e+06	10009.3	1995	1989	1991	0	3	0	0	0	0	23.3	4.18075	1.54314	37.3446	20.8346	21.1803	0	1.57647	41.6773	4.63857	38.9525	44.6568	21.3161	52.9382	53.25	90.7083	47.9091	0.966989	14.3886	0.404367	0	0	0.289344	44.4725	0	22.8474	15.9403	0.588689	13.1709	10.577	0.088	0.175035	23.1596	0.518675	0
330704	1996	330704	210570	4.54756e+06	10009.3	1996	1999	2001	0	3	0	0	0	0	23.3	4.10719	1.52413	37.6961	22.9736	22.7923	0	1.60362	41.8861	5.00319	39.0455	43.7923	22.5063	52.5193	51.0869	89.3048	50.1114	0.930764	13.6513	0.381505	0	0	0.321493	46.5022	0	20.8485	16.519	0.592976	13.9231	10.113	0.087	0.140028	25.3551	0.522962	0
330704	1997	330704	210570	4.54756e+06	10009.3	1997	1999	2001	0	2	0	0	0	0	3.3	4.03363	1.50512	38.0476	25.1126	24.4044	0	1.63078	42.095	5.36782	39.1385	42.9278	23.6964	52.1003	48.9237	87.9012	52.3137	0.894539	12.914	0.358643	0	0	0.353642	48.5318	0	18.8495	17.0977	0.597262	14.6752	9.64892	0.086	0.105021	27.5505	0.527248	0
330704	1998	330704	210570	4.54756e+06	10009.3	1998	1999	2001	0	2	0	0	0	0	3.3	3.96006	1.48611	38.3991	27.2516	26.0164	0	1.65793	42.3039	5.73244	39.2315	42.0633	24.8865	51.6814	46.7606	86.4977	54.516	0.858314	12.1767	0.335781	0	0	0.385791	50.5615	0	16.8505	17.6764	0.601549	15.4274	9.18487	0.084	0.070014	29.7459	0.531535	0
330704	1999	330704	210570	4.54756e+06	10009.3	1999	1999	2001	6	2	3	0	0	7.7	3.3	3.8865	1.4671	38.7506	29.3906	27.6284	0	1.68508	42.5127	6.09706	39.3244	41.1989	26.0767	51.2624	44.5975	85.0942	56.7182	0.822089	11.4394	0.31292	0	0	0.417941	52.5912	0	14.8515	18.2551	0.605835	16.1795	8.72083	0.083	0.035007	31.9414	0.535821	0
330704	2000	330704	210570	4.54756e+06	10009.3	2000	1999	2001	1	6	0	1	0	20	7.7	3.81294	1.44809	39.102	31.5296	29.2405	0.341826	1.60783	43.0218	6.49348	40.9979	41.0972	24.1787	50.0168	44.5975	85.0942	57.0713	0.822089	10.7021	0.290058	0	0	0.45009	54.6209	0	12.8526	18.8338	0.610122	16.9317	8.25678	0.1	0	34.1368	0.540108	0
330704	2001	330704	210570	4.54756e+06	10009.3	2001	1999	2001	3	7	1	1	0	20.5	27.7	3.81294	1.44809	39.102	31.5296	29.2405	0.683652	1.53058	43.531	6.8899	42.6713	40.9956	22.2807	48.7711	44.5975	85.0942	57.4243	0.822089	10.6971	0.291725	0	0	0.451757	54.6193	0	12.8992	18.7921	0.611789	16.921	8.2911	0.1	0	28.4474	0.45009	0
330704	2002	330704	210570	4.54756e+06	10009.3	2002	1999	2001	0	10	0	0	0	0	48.2	3.81294	1.44809	39.102	31.5296	29.2405	1.02548	1.45333	44.0401	7.28632	44.3447	40.894	20.3827	47.5255	44.5975	85.0942	57.7773	0.822089	10.6921	0.293392	0	0	0.453424	54.6176	0	12.9459	18.7504	0.613456	16.9102	8.32541	0.1	0	22.7579	0.360072	0
330704	2003	330704	210570	4.54756e+06	10009.3	2003	1999	2001	1	10	0	0	0	1	48.2	3.81294	1.44809	39.102	31.5296	29.2405	1.3673	1.37607	44.5492	7.68275	46.0181	40.7924	18.4847	46.2798	44.5975	85.0942	58.1303	0.822089	10.6871	0.295059	0	0	0.455091	54.6159	0	12.9926	18.7087	0.615123	16.8995	8.35973	0.1	0	17.0684	0.270054	0
330704	2004	330704	210570	4.54756e+06	10009.3	2004	1999	2001	4	11	0	0	0	2.55	49.2	3.81294	1.44809	39.102	31.5296	29.2405	1.70913	1.29882	45.0583	8.07917	47.6916	40.6907	16.5868	45.0342	44.5975	85.0942	58.4833	0.822089	10.6821	0.296726	0	0	0.456758	54.6143	0	13.0393	18.6671	0.61679	16.8887	8.39404	0.1	0	11.3789	0.180036	0
330704	2005	330704	210570	4.54756e+06	10009.3	2005	1999	2001	6	9	3	0	0	9.54	44.05	3.81294	1.44809	39.102	31.5296	29.2405	2.05096	1.22157	45.5675	8.47559	49.365	40.5891	14.6888	43.7886	44.5975	85.0942	58.8364	0.822089	10.6771	0.298393	0	0	0.458425	54.6126	0	13.086	18.6254	0.618457	16.878	8.42836	0.1	0	5.68947	0.090018	0
330704	2006	330704	210570	4.54756e+06	10009.3	2006	2009	2001	4	14	1	0	0	2.51	33.59	3.81294	1.44809	39.102	31.5296	29.2405	2.39278	1.14432	46.0766	8.87201	51.0384	40.4875	12.7908	42.5429	44.5975	85.0942	59.1894	0.822089	10.6721	0.30006	0	0	0.460092	54.6109	0	13.1326	18.5837	0.620124	16.8673	8.46267	0.1	0	0	0	0
330704	2007	330704	210570	4.54756e+06	10009.3	2007	2009	2001	10	15	1	0	0	1.76	15.6	3.81294	1.44809	39.102	31.5296	29.2405	2.73461	1.06706	46.5857	9.26843	52.7119	40.3858	10.8928	41.2973	44.5975	85.0942	59.5424	0.822089	10.6721	0.30006	0	0	0.460092	54.6109	0	13.1326	18.5837	0.620124	16.8673	8.46267	0.1	0	0	0	0
330704	2008	330704	210570	4.54756e+06	10009.3	2008	2009	2001	3	25	0	0	0	0.15	17.36	3.81294	1.44809	39.102	31.5296	29.2405	3.41826	0.912559	47.604	10.0613	56.0587	40.1826	7.09685	38.806	44.5975	85.0942	60.2484	0.822089	10.6721	0.30006	0	0	0.460092	54.6109	0	13.1326	18.5837	0.620124	16.8673	8.46267	0.1	0	0	0	0
330705	1979	330705	209883	4.53758e+06	10009.2	1979	1972	1981	0	0	0	0	0	0	0	7.50472	0.150678	74.6596	2.2207	11.803	0.182	1.45285	45.8737	4.46834	42.5053	46.2037	11.9579	48.8821	60.6331	24.4553	32.8029	23.0609	30.7773	0.155062	0	0	5.97739	14.0706	0	24.3097	17.1919	1.72569	3.46069	20.001	0.135	0.240096	15.4512	0	0.37515
330705	1980	330705	209883	4.53758e+06	10009.2	1980	1982	1981	0	0	0	0	0	0	0	7.30194	0.150678	74.6596	2.2207	11.803	0.121	1.42039	48.4619	3.8355	43.9216	45.6241	12.6405	47.1425	60.6331	24.4553	32.8029	23.0609	29.5604	0.15006	0	0	6.34254	13.5869	0	25.06	18.3616	1.97222	3.43953	20.7847	0.14	0.274395	13.8027	0	0.428743
330705	1981	330705	209883	4.53758e+06	10009.2	1981	1982	1981	0	0	0	0	0	0	0	7.2494	0.162443	72.7657	2.54872	12.6616	0.061	1.38793	51.0501	3.20266	45.3378	45.0445	13.3231	45.4028	60.6331	24.4553	32.8029	23.0609	28.3435	0.145058	0	0	6.70768	13.1031	0	25.8103	19.5314	2.21874	3.41837	21.5684	0.145	0.308695	12.1541	0	0.482336
330705	1982	330705	209883	4.53758e+06	10009.2	1982	1982	1981	0	0	0	0	0	0	0	7.19685	0.174207	70.8718	2.87673	13.5202	0	1.35547	53.6383	2.56982	46.7541	44.4649	14.0058	43.6632	60.6331	24.4553	32.8029	23.0609	27.1266	0.140056	0	0	7.07283	12.6193	0	26.5606	20.7011	2.46527	3.39722	22.3521	0.15	0.342994	10.5056	0	0.535929
330705	1983	330705	209883	4.53758e+06	10009.2	1983	1982	1981	0	0	0	0	0	0	0	7.1443	0.185972	68.9779	3.20475	14.3789	0	1.31418	51.735	2.73872	47.4752	44.1671	13.3872	45.2545	61.7395	34.9977	32.3422	19.8723	25.9096	0.135054	0	0	7.43797	12.1356	0	27.3109	21.8709	2.7118	3.37606	23.1358	0.155	0.377294	8.85711	0	0.589521
330705	1984	330705	209883	4.53758e+06	10009.2	1984	1982	1981	0	0	0	0	0	0	0	7.09175	0.197736	67.084	3.53276	15.2375	0	1.2729	49.8318	2.90761	48.1963	43.8693	12.7687	46.8459	62.846	45.5402	31.8816	16.6836	24.6927	0.130052	0	0	7.80312	11.6518	0	28.0612	23.0406	2.95833	3.3549	23.9195	0.16	0.411593	7.2086	0	0.643114
330705	1985	330705	209883	4.53758e+06	10009.2	1985	1982	1981	1	0	0	0	1	160	0	7.03921	0.209501	65.19	3.86078	16.0961	0	1.23161	47.9285	3.07651	48.9174	43.5716	12.1501	48.4373	63.9524	56.0826	31.4209	13.4949	23.4758	0.12505	0	0	8.16827	11.168	0	28.8115	24.2104	3.20485	3.33374	24.7032	0.165	0.445893	5.56008	0	0.696707
330705	1986	330705	209883	4.53758e+06	10009.2	1986	1989	1991	0	1	0	0	0	0	160	6.98666	0.221266	63.2961	4.1888	16.9548	0	1.19032	46.0252	3.2454	49.6385	43.2738	11.5316	50.0287	65.0589	66.625	30.9602	10.3063	22.2589	0.120048	0	0	8.53341	10.6843	0	29.5618	25.3802	3.45138	3.31259	25.4869	0.18	0.480192	3.91156	0	0.7503
330705	1987	330705	209883	4.53758e+06	10009.2	1987	1989	1991	0	1	0	0	0	0	160	6.93411	0.23303	61.4022	4.51681	17.8134	0	1.14903	44.122	3.4143	50.3596	42.976	10.913	51.6201	66.1654	77.1674	30.4995	7.11761	22.0074	0.111473	0	0	8.04393	10.9065	0	28.9666	25.268	4.19168	3.77201	24.8081	0.178	0.456611	4.77119	0	0.807466
330705	1988	330705	209883	4.53758e+06	10009.2	1988	1989	1991	1	1	0	1	0	17	160	6.88156	0.244795	59.5083	4.84483	18.6721	0	1.10775	42.2187	3.58319	51.0807	42.6782	10.2945	53.2115	67.2718	87.7099	30.0388	3.92894	21.7558	0.102898	0	0	7.55445	11.1287	0	28.3713	25.1558	4.93197	4.23144	24.1292	0.108	0.43303	5.63082	0	0.864631
330705	1989	330705	209883	4.53758e+06	10009.2	1989	1989	1991	3	2	1	2	0	137	177	6.82901	0.256559	57.6144	5.17284	19.5307	0	1.06646	40.3154	3.75209	51.8019	42.3805	9.67593	54.8029	68.3783	98.2523	29.5782	0.740281	21.5043	0.0943234	0	0	7.06497	11.351	0	27.7761	25.0436	5.67227	4.69086	23.4504	0.107	0.409449	6.49045	0	0.921797
330705	1990	330705	209883	4.53758e+06	10009.2	1990	1989	1991	0	5	0	0	0	0	314	6.77647	0.268324	55.7204	5.50086	20.3893	0	1.05552	41.296	3.50637	52.8676	42.5989	10.0046	54.1681	66.8982	96.5592	31.1232	0.724534	21.2528	0.0857486	0	0	6.57549	11.5732	0	27.1809	24.9314	6.41257	5.15028	22.7715	0.106	0.385869	7.35008	0	0.978963
330705	1991	330705	209883	4.53758e+06	10009.2	1991	1989	1991	0	4	0	0	0	0	154	6.68723	0.251656	51.2344	10.0435	22.1587	0	1.04457	42.2766	3.26065	53.9334	42.8173	10.3333	53.5333	65.418	94.8661	32.6682	0.708786	21.0013	0.0771737	0	0	6.08601	11.7954	0	26.5856	24.8192	7.15286	5.60971	22.0926	0.104	0.362288	8.20971	0	1.03613
330705	1992	330705	209883	4.53758e+06	10009.2	1992	1989	1991	0	4	0	0	0	0	154	6.598	0.234988	46.7484	14.5862	23.9282	0	1.03363	43.2572	3.01493	54.9991	43.0357	10.662	52.8986	63.9379	93.173	34.2132	0.693039	20.7497	0.0685989	0	0	5.59652	12.0177	0	25.9904	24.707	7.89316	6.06913	21.4138	0.103	0.338707	9.06934	0	1.09329
330705	1993	330705	209883	4.53758e+06	10009.2	1993	1989	1991	2	4	1	0	0	2.2	154	6.50877	0.21832	42.2624	19.1288	25.6976	0	1.02269	44.2377	2.7692	56.0649	43.2541	10.9907	52.2638	62.4578	91.48	35.7582	0.677291	20.4982	0.060024	0	0	5.10704	12.2399	0	25.3952	24.5948	8.63345	6.52856	20.7349	0.101	0.315126	9.92897	0	1.15046
330705	1994	330705	209883	4.53758e+06	10009.2	1994	1989	1991	1	5	0	0	0	1	139.2	6.41954	0.201652	37.7763	23.6715	27.467	0	1.01175	45.2183	2.52348	57.1306	43.4725	11.3194	51.6291	60.9776	89.7869	37.3032	0.661544	20.2467	0.0514491	0	0	4.61756	12.4621	0	24.7999	24.4827	9.37375	6.98798	20.0561	0.1	0.291545	10.7886	0	1.20763
330705	1995	330705	209883	4.53758e+06	10009.2	1995	1989	1991	0	3	0	0	0	0	3.2	6.3303	0.184984	33.2903	28.2141	29.2365	0	1.00081	46.1989	2.27776	58.1964	43.6909	11.6481	50.9943	59.4975	88.0938	38.8482	0.645797	19.9951	0.0428743	0	0	4.12808	12.6844	0	24.2047	24.3705	10.114	7.4474	19.3772	0.098	0.267964	11.6482	0	1.26479
330705	1996	330705	209883	4.53758e+06	10009.2	1996	1999	2001	0	3	0	0	0	0	3.2	6.24107	0.168317	28.8043	32.7568	31.0059	0	0.989864	47.1795	2.03204	59.2621	43.9092	11.9767	50.3595	58.0174	86.4007	40.3933	0.630049	19.7436	0.0342994	0	0	3.6386	12.9066	0	23.6094	24.2583	10.8543	7.90683	18.6984	0.097	0.244383	12.5079	0	1.32196
330705	1997	330705	209883	4.53758e+06	10009.2	1997	1999	2001	1	3	0	0	0	0	3.2	6.15184	0.151649	24.3182	37.2994	32.7753	0	0.978923	48.16	1.78632	60.3279	44.1276	12.3054	49.7248	56.5372	84.7076	41.9383	0.614302	19.4921	0.0257246	0	0	3.14912	13.1288	0	23.0142	24.1461	11.5946	8.36625	18.0195	0.096	0.220803	13.3675	0	1.37912
330705	1998	330705	209883	4.53758e+06	10009.2	1998	1999	2001	1	4	1	0	0	10	3.2	6.0626	0.134981	19.8322	41.8421	34.5447	0	0.967981	49.1406	1.5406	61.3936	44.346	12.6341	49.09	55.0571	83.0145	43.4833	0.598554	19.2406	0.0171497	0	0	2.65964	13.3511	0	22.419	24.0339	12.3349	8.82568	17.3406	0.094	0.197222	14.2271	0	1.43629
330705	1999	330705	209883	4.53758e+06	10009.2	1999	1999	2001	1	3	1	0	0	2	11	5.97337	0.118313	15.3462	46.3847	36.3142	0	0.957039	50.1212	1.29488	62.4594	44.5644	12.9628	48.4552	53.577	81.3214	45.0283	0.582807	18.989	0.00857486	0	0	2.17015	13.5733	0	21.8237	23.9217	13.0752	9.2851	16.6618	0.093	0.173641	15.0867	0	1.49345
330705	2000	330705	209883	4.53758e+06	10009.2	2000	1999	2001	0	3	0	0	0	0	12	5.88414	0.101645	10.8601	50.9274	38.0836	0.00791873	0.981198	49.9047	2.74443	61.8822	44.6775	12.7031	47.2152	53.577	81.3214	45.5034	0.582807	18.7375	0	0	0	1.68067	13.7955	0	21.2285	23.8095	13.8155	9.74453	15.9829	0.11	0.15006	15.9464	0	1.55062
330705	2001	330705	209883	4.53758e+06	10009.2	2001	1999	2001	2	3	0	0	0	0.4	12	5.88414	0.101645	10.8601	50.9274	38.0836	0.0158375	1.00536	49.6882	4.19397	61.305	44.7906	12.4434	45.9752	53.577	81.3214	45.9785	0.582807	18.7358	0	0	0	1.68067	13.9006	0	21.2252	23.7395	13.7872	9.83944	15.9876	0.11	0.12505	13.3937	0	1.29218
330705	2002	330705	209883	4.53758e+06	10009.2	2002	1999	2001	0	5	0	0	0	0	12.4	5.88414	0.101645	10.8601	50.9274	38.0836	0.0237562	1.02952	49.4717	5.64352	60.7279	44.9037	12.1837	44.7351	53.577	81.3214	46.4537	0.582807	18.7342	0	0	0	1.68067	14.0056	0	21.2218	23.6695	13.7588	9.93435	15.9923	0.11	0.10004	10.841	0	1.03375
330705	2003	330705	209883	4.53758e+06	10009.2	2003	1999	2001	1	4	0	1	0	20	12.4	5.88414	0.101645	10.8601	50.9274	38.0836	0.0316749	1.05368	49.2552	7.09307	60.1507	45.0168	11.924	43.4951	53.577	81.3214	46.9288	0.582807	18.7325	0	0	0	1.68067	14.1106	0	21.2185	23.5994	13.7305	10.0293	15.9969	0.11	0.07503	8.28831	0	0.77531
330705	2004	330705	209883	4.53758e+06	10009.2	2004	1999	2001	0	4	0	0	0	0	22.4	5.88414	0.101645	10.8601	50.9274	38.0836	0.0395936	1.07784	49.0387	8.54262	59.5735	45.1299	11.6643	42.255	53.577	81.3214	47.4039	0.582807	18.7308	0	0	0	1.68067	14.2157	0	21.2152	23.5294	13.7021	10.1242	16.0016	0.11	0.05002	5.73561	0	0.516873
330705	2005	330705	209883	4.53758e+06	10009.2	2005	1999	2001	0	3	0	0	0	0	20.4	5.88414	0.101645	10.8601	50.9274	38.0836	0.0475124	1.10199	48.8222	9.99217	58.9964	45.243	11.4046	41.015	53.577	81.3214	47.8791	0.582807	18.7292	0	0	0	1.68067	14.3207	0	21.2118	23.4594	13.6738	10.2191	16.0063	0.11	0.02501	3.18292	0	0.258437
330705	2006	330705	209883	4.53758e+06	10009.2	2006	2009	2001	2	3	0	0	0	0.11	20.4	5.88414	0.101645	10.8601	50.9274	38.0836	0.0554311	1.12615	48.6058	11.4417	58.4192	45.3561	11.1449	39.775	53.577	81.3214	48.3542	0.582807	18.7275	0	0	0	1.68067	14.4258	0	21.2085	23.3894	13.6455	10.314	16.0109	0.11	0	0.630233	0	0
330705	2007	330705	209883	4.53758e+06	10009.2	2007	2009	2001	0	3	0	0	0	0	20.11	5.88414	0.101645	10.8601	50.9274	38.0836	0.0633498	1.15031	48.3893	12.8913	57.842	45.4692	10.8852	38.5349	53.577	81.3214	48.8293	0.582807	18.7275	0	0	0	1.68067	14.4258	0	21.2085	23.3894	13.6455	10.314	16.0109	0.11	0	0.630233	0	0
330705	2008	330705	209883	4.53758e+06	10009.2	2008	2009	2001	0	3	0	0	0	0	20.11	5.88414	0.101645	10.8601	50.9274	38.0836	0.0791873	1.19863	47.9563	15.7904	56.6877	45.6954	10.3658	36.0549	53.577	81.3214	49.7796	0.582807	18.7275	0	0	0	1.68067	14.4258	0	21.2085	23.3894	13.6455	10.314	16.0109	0.11	0	0	0	0
330706	1979	330706	209197	4527599	10009.7	1979	1972	1981	0	0	0	0	0	0	0	6.24153	0.063848	44.5586	6.4592	29.0632	0.208	1.36531	59.547	2.40925	43.9631	47.2265	12.0704	37.3251	57.5212	11.6669	29.9601	24.1534	62.2599	0.560224	0	0	5.62725	9.76391	0	18.7575	2.81112	0.205082	1.10167	19.0024	0.05	0	18.6675	0.55022	0
330706	1980	330706	209197	4527599	10009.7	1980	1982	1981	0	0	0	0	0	0	0	5.94835	0.063848	44.5586	6.4592	29.0632	0.139	1.24797	62.5933	2.75301	46.7712	46.3658	10.706	34.1313	57.5212	11.6669	29.9601	24.1534	61.9576	0.538787	0	0	6.0267	9.4352	0	19.0948	2.69679	0.234379	1.15859	20.4153	0.07	0	16.3408	0.525925	0
330706	1981	330706	209197	4527599	10009.7	1981	1982	1981	0	0	0	0	0	0	0	5.79399	0.10864	44.004	6.51065	28.4127	0.069	1.13062	65.6395	3.09677	49.5792	45.5051	9.34164	30.9375	57.5212	11.6669	29.9601	24.1534	61.6554	0.51735	0	0	6.42614	9.1065	0	19.4321	2.58246	0.263677	1.21552	21.8281	0.09	0	14.0142	0.501629	0
330706	1982	330706	209197	4527599	10009.7	1982	1982	1981	0	0	0	0	0	0	0	5.63963	0.153432	43.4495	6.5621	27.7621	0	1.01328	68.6858	3.44053	52.3873	44.6444	7.97724	27.7437	57.5212	11.6669	29.9601	24.1534	61.3531	0.495913	0	0	6.82559	8.7778	0	19.7693	2.46813	0.292974	1.27245	23.241	0.11	0	11.6875	0.477334	0
330706	1983	330706	209197	4527599	10009.7	1983	1982	1981	0	0	0	0	0	0	0	5.48527	0.198224	42.8949	6.61355	27.1116	0	0.999611	63.5411	4.54935	51.1339	45.1634	8.7017	31.6114	55.5763	23.9435	29.8081	20.7945	61.0508	0.474475	0	0	7.22503	8.44909	0	20.1066	2.3538	0.322272	1.32938	24.6538	0.13	0	9.36089	0.453038	0
330706	1984	330706	209197	4527599	10009.7	1984	1982	1981	0	0	0	0	0	0	0	5.33091	0.243016	42.3404	6.665	26.461	0	0.985943	58.3964	5.65817	49.8806	45.6823	9.42616	35.4791	53.6314	36.2201	29.6562	17.4356	60.7486	0.453038	0	0	7.62448	8.12039	0	20.4439	2.23947	0.351569	1.3863	26.0667	0.15	0	7.03424	0.428743	0
330706	1985	330706	209197	4527599	10009.7	1985	1982	1981	0	0	0	0	0	0	0	5.17654	0.287807	41.7859	6.71645	25.8104	0	0.972276	53.2517	6.76699	48.6272	46.2013	10.1506	39.3469	51.6865	48.4966	29.5043	14.0768	60.4463	0.431601	0	0	8.02392	7.79169	0	20.7812	2.12514	0.380867	1.44323	27.4796	0.17	0	4.7076	0.404447	0
330706	1986	330706	209197	4527599	10009.7	1986	1989	1991	1	0	0	1	0	40	0	5.02218	0.332599	41.2313	6.7679	25.1599	0	0.958608	48.107	7.87581	47.3739	46.7202	10.8751	43.2146	49.7415	60.7732	29.3523	10.7179	60.1441	0.410164	0	0	8.42337	7.46298	0	21.1184	2.0108	0.410164	1.50016	28.8924	0.23	0	2.38095	0.380152	0
330706	1987	330706	209197	4527599	10009.7	1987	1989	1991	0	1	0	0	0	0	40	4.86782	0.377391	40.6768	6.81935	24.5093	0	0.944941	42.9623	8.98463	46.1205	47.2392	11.5995	47.0823	47.7966	73.0497	29.2004	7.35897	58.8921	0.407306	0	0	8.8221	6.93063	0	20.1645	2.04653	0.893214	1.96487	28.8601	0.228	0.005002	3.84797	0.358	0
330706	1988	330706	209197	4527599	10009.7	1988	1989	1991	0	1	0	0	0	0	40	4.71346	0.422183	40.1223	6.8708	23.8588	0	0.931273	37.8176	10.0934	44.8672	47.7582	12.324	50.95	45.8517	85.3263	29.0484	4.00007	57.6402	0.404447	0	0	9.22083	6.39827	0	19.2105	2.08226	1.37626	2.42958	28.8278	0.148	0.010004	5.31498	0.335849	0
330706	1989	330706	209197	4527599	10009.7	1989	1989	1991	3	1	1	1	1	2997	40	4.5591	0.466975	39.5677	6.92225	23.2082	0	0.917605	32.673	11.2023	43.6138	48.2771	13.0485	54.8178	43.9068	97.6029	28.8965	0.641182	56.3883	0.401589	0	0	9.61956	5.86592	0	18.2566	2.11799	1.85932	2.89429	28.7955	0.147	0.015006	6.782	0.313697	0
330706	1990	330706	209197	4527599	10009.7	1990	1989	1991	0	4	0	0	0	0	3037	4.40473	0.511767	39.0132	6.9737	22.5576	0	0.926734	35.8704	10.1266	44.5494	46.921	13.6328	52.8137	43.759	96.1177	30.9768	0.620781	55.1363	0.398731	0	0	10.0183	5.33356	0	17.3026	2.15372	2.34237	3.359	28.7631	0.146	0.020008	8.24901	0.291545	0
330706	1991	330706	209197	4527599	10009.7	1991	1989	1991	0	4	0	0	0	0	3037	4.31932	0.490159	36.4902	12.375	22.8119	0	0.935862	39.0678	9.05096	45.485	45.5649	14.2172	50.8096	43.6112	94.6325	33.0572	0.600381	53.8844	0.395873	0	0	10.417	4.80121	0	16.3487	2.18945	2.82542	3.8237	28.7308	0.144	0.02501	9.71603	0.269393	0
330706	1992	330706	209197	4527599	10009.7	1992	1989	1991	0	3	0	0	0	0	2997	4.2339	0.46855	33.9673	17.7763	23.0661	0	0.94499	42.2653	7.97531	46.4206	44.2089	14.8015	48.8055	43.4633	93.1473	35.1376	0.579981	52.6325	0.393014	0	0	10.8158	4.26885	0	15.3947	2.22518	3.30847	4.28841	28.6985	0.143	0.030012	11.183	0.247242	0
330706	1993	330706	209197	4527599	10009.7	1993	1989	1991	0	3	0	0	0	0	2997	4.14848	0.446942	31.4443	23.1776	23.3203	0	0.954118	45.4627	6.89966	47.3562	42.8528	15.3859	46.8014	43.3155	91.6621	37.2179	0.55958	51.3806	0.390156	0	0	11.2145	3.73649	0	14.4408	2.2609	3.79152	4.75312	28.6662	0.141	0.035014	12.6501	0.22509	0
330706	1994	330706	209197	4527599	10009.7	1994	1989	1991	0	3	0	0	0	0	2997	4.06306	0.425334	28.9214	28.5788	23.5746	0	0.963247	48.6602	5.82401	48.2918	41.4967	15.9702	44.7973	43.1677	90.1769	39.2983	0.53918	50.1286	0.387298	0	0	11.6132	3.20414	0	13.4868	2.29663	4.27457	5.21783	28.6338	0.14	0.040016	14.1171	0.202938	0
330706	1995	330706	209197	4527599	10009.7	1995	1989	1991	1	0	0	0	0	1	0	3.97764	0.403726	26.3984	33.9801	23.8288	0	0.972375	51.8576	4.74836	49.2274	40.1406	16.5546	42.7932	43.0199	88.6917	41.3787	0.518779	48.8767	0.384439	0	0	12.0119	2.67178	0	12.5329	2.33236	4.75762	5.68254	28.6015	0.138	0.045018	15.5841	0.180787	0
330706	1996	330706	209197	4527599	10009.7	1996	1999	2001	1	1	1	0	0	10	1	3.89222	0.382117	23.8755	39.3814	24.083	0	0.981503	55.0551	3.67271	50.163	38.7845	17.1389	40.7891	42.872	87.2065	43.459	0.498379	47.6248	0.381581	0	0	12.4107	2.13943	0	11.5789	2.36809	5.24067	6.14725	28.5692	0.137	0.05002	17.0511	0.158635	0
330706	1997	330706	209197	4527599	10009.7	1997	1999	2001	1	2	1	0	0	3	11	3.8068	0.360509	21.3525	44.7827	24.3372	0	0.990631	58.2525	2.59706	51.0986	37.4284	17.7233	38.785	42.7242	85.7214	45.5394	0.477978	46.3728	0.378723	0	0	12.8094	1.60707	0	10.625	2.40382	5.72372	6.61196	28.5369	0.136	0.055022	18.5181	0.136483	0
330706	1998	330706	209197	4527599	10009.7	1998	1999	2001	0	3	0	0	0	0	14	3.72138	0.338901	18.8296	50.184	24.5915	0	0.99976	61.45	1.52141	52.0342	36.0723	18.3076	36.7809	42.5764	84.2362	47.6198	0.457578	45.1209	0.375865	0	0	13.2081	1.07472	0	9.67101	2.43955	6.20677	7.07667	28.5046	0.134	0.060024	19.9851	0.114331	0
330706	1999	330706	209197	4527599	10009.7	1999	1999	2001	0	3	0	0	0	0	14	3.63597	0.317292	16.3066	55.5853	24.8457	0	1.00889	64.6474	0.445764	52.9698	34.7163	18.8919	34.7768	42.4286	82.751	49.7001	0.437177	43.869	0.373006	0	0	13.6069	0.54236	0	8.71706	2.47528	6.68982	7.54138	28.4722	0.133	0.065026	21.4522	0.0921797	0
330706	2000	330706	209197	4527599	10009.7	2000	1999	2001	3	3	2	0	0	11	14	3.55055	0.295684	13.7836	60.9866	25.0999	0.135301	0.992838	62.7412	2.08234	53.5382	36.2206	18.0028	34.9122	42.4286	82.751	49.6509	0.437177	42.617	0.370148	0	0	14.0056	0.010004	0	7.76311	2.511	7.17287	8.00609	28.4399	0.15	0.070028	22.9192	0.070028	0
330706	2001	330706	209197	4527599	10009.7	2001	1999	2001	0	5	0	0	0	0	24	3.55055	0.295684	13.7836	60.9866	25.0999	0.270602	0.976788	60.8349	3.71891	54.1066	37.7249	17.1137	35.0475	42.4286	82.751	49.6017	0.437177	42.6721	0.371815	0	0	13.9456	0.010004	0	7.76477	2.50767	7.17287	7.846	28.3634	0.15	0.0583567	19.1643	0.0583567	0
330706	2002	330706	209197	4527599	10009.7	2002	1999	2001	2	4	2	0	0	9.5	14	3.55055	0.295684	13.7836	60.9866	25.0999	0.405902	0.960738	58.9286	5.35549	54.6749	39.2292	16.2245	35.1828	42.4286	82.751	49.5525	0.437177	42.7271	0.373483	0	0	13.8856	0.010004	0	7.76644	2.50433	7.17287	7.68591	28.287	0.15	0.0466853	15.4095	0.0466853	0
330706	2003	330706	209197	4527599	10009.7	2003	1999	2001	0	5	0	0	0	0	20.5	3.55055	0.295684	13.7836	60.9866	25.0999	0.541203	0.944688	57.0224	6.99206	55.2433	40.7335	15.3354	35.3182	42.4286	82.751	49.5032	0.437177	42.7821	0.37515	0	0	13.8255	0.010004	0	7.76811	2.501	7.17287	7.52583	28.2105	0.15	0.035014	11.6546	0.035014	0
330706	2004	330706	209197	4527599	10009.7	2004	1999	2001	0	5	0	0	0	0	20.5	3.55055	0.295684	13.7836	60.9866	25.0999	0.676504	0.928638	55.1161	8.62864	55.8116	42.2379	14.4463	35.4535	42.4286	82.751	49.454	0.437177	42.8371	0.376817	0	0	13.7655	0.010004	0	7.76977	2.49767	7.17287	7.36574	28.134	0.15	0.0233427	7.89981	0.0233427	0
330706	2005	330706	209197	4527599	10009.7	2005	1999	2001	0	5	0	0	0	0	20.5	3.55055	0.295684	13.7836	60.9866	25.0999	0.811805	0.912588	53.2099	10.2652	56.38	43.7422	13.5571	35.5888	42.4286	82.751	49.4048	0.437177	42.8922	0.378485	0	0	13.7055	0.010004	0	7.77144	2.49433	7.17287	7.20566	28.0576	0.15	0.0116713	4.14497	0.0116713	0
330706	2006	330706	209197	4527599	10009.7	2006	2009	2001	2	2	0	0	0	0.25	9.5	3.55055	0.295684	13.7836	60.9866	25.0999	0.947105	0.896538	51.3036	11.9018	56.9484	45.2465	12.668	35.7242	42.4286	82.751	49.3556	0.437177	42.9472	0.380152	0	0	13.6455	0.010004	0	7.77311	2.491	7.17287	7.04557	27.9811	0.15	0	0.39013	0	0
330706	2007	330706	209197	4527599	10009.7	2007	2009	2001	0	4	0	0	0	0	9.75	3.55055	0.295684	13.7836	60.9866	25.0999	1.08241	0.880488	49.3974	13.5384	57.5167	46.7508	11.7789	35.8595	42.4286	82.751	49.3063	0.437177	42.9472	0.380152	0	0	13.6455	0.010004	0	7.77311	2.491	7.17287	7.04557	27.9811	0.15	0	0.39013	0	0
330706	2008	330706	209197	4527599	10009.7	2008	2009	2001	1	2	0	1	0	13.7	0.25	3.55055	0.295684	13.7836	60.9866	25.0999	1.35301	0.848388	45.5849	16.8115	58.6535	49.7595	10.0006	36.1302	42.4286	82.751	49.2079	0.437177	42.9472	0.380152	0	0	13.6455	0.010004	0	7.77311	2.491	7.17287	7.04557	27.9811	0.15	0	0	0	0
330707	1979	330707	208513	4.51762e+06	10009.7	1979	1972	1981	0	0	0	0	0	0	0	5.93103	0.122889	43.5533	13.6286	17.8303	0.336	1.21821	52.3951	6.25967	27.4632	51.7684	44.1257	40.488	26.3881	49.6267	23.1736	65.3731	85.9294	0.010004	0	0	0.205082	6.98279	0	6.7477	0.12505	0	0.0834149	1.34047	0	0	43.0822	0	0
330707	1980	330707	208513	4.51762e+06	10009.7	1980	1982	1981	0	0	0	0	0	0	0	5.58086	0.122889	43.5533	13.6286	17.8303	0.224	1.19885	53.3173	7.05432	27.6602	51.9058	45.5015	39.0133	26.3881	49.6267	23.1736	65.3731	85.7486	0.0114331	0	0	0.234379	7.11142	0	6.75127	0.142914	0	0.0953313	1.51637	0	0	37.2492	0	0
330707	1981	330707	208513	4.51762e+06	10009.7	1981	1982	1981	0	0	0	0	0	0	0	5.46146	0.146138	42.4546	13.1557	18.64	0.112	1.17949	54.2394	7.84897	27.8572	52.0431	46.8774	37.5386	26.3881	49.6267	23.1736	65.3731	85.5678	0.0128623	0	0	0.263677	7.24004	0	6.75484	0.160779	0	0.107248	1.69226	0	0	31.4161	0	0
330707	1982	330707	208513	4.51762e+06	10009.7	1982	1982	1981	0	0	0	0	0	0	0	5.34206	0.169387	41.3558	12.6828	19.4498	0	1.16013	55.1616	8.64362	28.0541	52.1805	48.2532	36.0639	26.3881	49.6267	23.1736	65.3731	85.387	0.0142914	0	0	0.292974	7.36866	0	6.75842	0.178643	0	0.119164	1.86815	0	0	25.5831	0	0
330707	1983	330707	208513	4.51762e+06	10009.7	1983	1982	1981	0	0	0	0	0	0	0	5.22266	0.192636	40.2571	12.2098	20.2595	0	1.13267	50.9665	8.70599	28.3527	52.8912	46.7252	39.9309	27.3343	55.9341	22.9952	56.0917	85.2062	0.0157206	0	0	0.322272	7.49728	0	6.76199	0.196507	0	0.13108	2.04404	0	0	19.75	0	0
330707	1984	330707	208513	4.51762e+06	10009.7	1984	1982	1981	0	0	0	0	0	0	0	5.10327	0.215885	39.1584	11.7369	21.0693	0	1.10521	46.7714	8.76837	28.6513	53.602	45.1971	43.7978	28.2806	62.2415	22.8168	46.8104	85.0254	0.0171497	0	0	0.351569	7.62591	0	6.76556	0.214371	0	0.142997	2.21993	0	0	13.917	0	0
330707	1985	330707	208513	4.51762e+06	10009.7	1985	1982	1981	0	0	0	0	0	0	0	4.98387	0.239134	38.0597	11.264	21.8791	0	1.07775	42.5763	8.83075	28.9498	54.3127	43.6691	47.6648	29.2268	68.5489	22.6384	37.529	84.8447	0.0185789	0	0	0.380867	7.75453	0	6.76914	0.232236	0	0.154913	2.39582	0	0	8.08395	0	0
330707	1986	330707	208513	4.51762e+06	10009.7	1986	1989	1991	0	0	0	0	0	0	0	4.86447	0.262384	36.961	10.791	22.6888	0	1.05029	38.3812	8.89313	29.2484	55.0234	42.141	51.5317	30.173	74.8563	22.46	28.2477	84.6639	0.020008	0	0	0.410164	7.88315	0	6.77271	0.2501	0	0.16683	2.57171	0	0	2.2509	0	0
330707	1987	330707	208513	4.51762e+06	10009.7	1987	1989	1991	0	0	0	0	0	0	0	4.74507	0.285633	35.8623	10.3181	23.4986	0	1.02283	34.1862	8.95551	29.547	55.7341	40.613	55.3986	31.1193	81.1637	22.2816	18.9663	83.935	0.0192934	0	0	0.741725	7.79812	0	7.06068	0.232236	0.212942	0.308954	3.82215	0	0.00643114	2.143	0	0.020008
330707	1988	330707	208513	4.51762e+06	10009.7	1988	1989	1991	0	0	0	0	0	0	0	4.62567	0.308882	34.7635	9.84518	24.3083	0	0.995368	29.9911	9.01788	29.8456	56.4448	39.0849	59.2656	32.0655	87.4711	22.1032	9.68495	83.2061	0.0185789	0	0	1.07329	7.71309	0	7.34865	0.214371	0.425885	0.451078	5.07259	0	0.0128623	2.0351	0	0.040016
330707	1989	330707	208513	4.51762e+06	10009.7	1989	1989	1991	0	0	0	0	0	0	0	4.50627	0.332131	33.6648	9.37225	25.1181	0	0.967907	25.796	9.08026	30.1441	57.1556	37.5569	63.1325	33.0117	93.7784	21.9247	0.403592	82.4773	0.0178643	0	0	1.40485	7.62805	0	7.63663	0.196507	0.638827	0.593202	6.32304	0	0.0192934	1.9272	0	0.060024
330707	1990	330707	208513	4.51762e+06	10009.7	1990	1989	1991	0	0	0	0	0	0	0	4.38687	0.35538	32.5661	8.89932	25.9278	0	0.930383	27.7218	8.2817	31.6204	56.0731	35.8614	62.192	33.9145	92.6803	24.0956	0.397262	81.7484	0.0171497	0	0	1.73641	7.54302	0	7.9246	0.178643	0.851769	0.735326	7.57348	0	0.0257246	1.8193	0	0.080032
330707	1991	330707	208513	4.51762e+06	10009.7	1991	1989	1991	0	0	0	0	0	0	0	4.30778	0.340473	31.0214	12.7698	26.8496	0	0.89286	29.6476	7.48313	33.0966	54.9907	34.1659	61.2515	34.8174	91.5822	26.2664	0.390932	81.0196	0.0164351	0	0	2.06797	7.45798	0	8.21257	0.160779	1.06471	0.87745	8.82392	0	0.0321557	1.7114	0	0.10004
330707	1992	330707	208513	4.51762e+06	10009.7	1992	1989	1991	0	0	0	0	0	0	0	4.22868	0.325567	29.4767	16.6403	27.7714	0	0.855336	31.5733	6.68456	34.5729	53.9082	32.4704	60.311	35.7202	90.4841	28.4372	0.384601	80.2907	0.0157206	0	0	2.39953	7.37295	0	8.50054	0.142914	1.27765	1.01957	10.0744	0	0.0385869	1.6035	0	0.120048
330707	1993	330707	208513	4.51762e+06	10009.7	1993	1989	1991	0	0	0	0	0	0	0	4.14959	0.31066	27.9319	20.5108	28.6933	0	0.817812	33.4991	5.886	36.0491	52.8258	30.7749	59.3704	36.623	89.386	30.608	0.378271	79.5618	0.015006	0	0	2.73109	7.28791	0	8.78852	0.12505	1.4906	1.1617	11.3248	0	0.045018	1.4956	0	0.140056
330707	1994	330707	208513	4.51762e+06	10009.7	1994	1989	1991	0	0	0	0	0	0	0	4.07049	0.295754	26.3872	24.3813	29.6151	0	0.780288	35.4249	5.08743	37.5254	51.7433	29.0793	58.4299	37.5258	88.2879	32.7788	0.371941	78.833	0.0142914	0	0	3.06265	7.20288	0	9.07649	0.107186	1.70354	1.30382	12.5752	0	0.0514491	1.3877	0	0.160064
330707	1995	330707	208513	4.51762e+06	10009.7	1995	1989	1991	0	0	0	0	0	0	0	3.9914	0.280847	24.8425	28.2519	30.5369	0	0.742765	37.3507	4.28887	39.0016	50.6609	27.3838	57.4894	38.4286	87.1898	34.9496	0.365611	78.1041	0.0135769	0	0	3.39421	7.11785	0	9.36446	0.0893214	1.91648	1.44595	13.8257	0	0.0578803	1.2798	0	0.180072
330707	1996	330707	208513	4.51762e+06	10009.7	1996	1999	2001	0	0	0	0	0	0	0	3.9123	0.26594	23.2978	32.1224	31.4587	0	0.705241	39.2764	3.4903	40.4779	49.5784	25.6883	56.5489	39.3314	86.0917	37.1204	0.359281	77.3752	0.0128623	0	0	3.72578	7.03281	0	9.65243	0.0714571	2.12942	1.58807	15.0761	0	0.0643114	1.1719	0	0.20008
330707	1997	330707	208513	4.51762e+06	10009.7	1997	1999	2001	0	0	0	0	0	0	0	3.83321	0.251034	21.7531	35.9929	32.3805	0	0.667717	41.2022	2.69174	41.9541	48.496	23.9928	55.6083	40.2342	84.9935	39.2912	0.35295	76.6464	0.0121477	0	0	4.05734	6.94778	0	9.9404	0.0535929	2.34237	1.73019	16.3266	0	0.0707426	1.064	0	0.220088
330707	1998	330707	208513	4.51762e+06	10009.7	1998	1999	2001	0	0	0	0	0	0	0	3.75411	0.236127	20.2083	39.8634	33.3023	0	0.630193	43.128	1.89317	43.4304	47.4136	22.2973	54.6678	41.1371	83.8954	41.462	0.34662	75.9175	0.0114331	0	0	4.3889	6.86275	0	10.2284	0.0357286	2.55531	1.87232	17.577	0	0.0771737	0.956097	0	0.240096
330707	1999	330707	208513	4.51762e+06	10009.7	1999	1999	2001	0	0	0	0	0	0	0	3.67502	0.221221	18.6636	43.7339	34.2241	0	0.59267	45.0538	1.0946	44.9066	46.3311	20.6018	53.7273	42.0399	82.7973	43.6329	0.34029	75.1886	0.0107186	0	0	4.72046	6.77771	0	10.5163	0.0178643	2.76825	2.01444	18.8275	0	0.0836049	0.848196	0	0.260104
330707	2000	330707	208513	4.51762e+06	10009.7	2000	1999	2001	0	0	0	0	0	0	0	3.59592	0.206314	17.1189	47.6044	35.1459	0.157434	0.584003	44.4504	2.30959	47.9058	46.5168	19.0078	52.9586	42.0399	82.7973	43.1094	0.34029	74.4598	0.010004	0	0	5.05202	6.69268	0	10.8043	0	2.98119	2.15657	20.0779	0	0.090036	0.740296	0	0.280112
330707	2001	330707	208513	4.51762e+06	10009.7	2001	1999	2001	0	0	0	0	0	0	0	3.59592	0.206314	17.1189	47.6044	35.1459	0.314869	0.575337	43.8469	3.52457	50.905	46.7025	17.4138	52.1899	42.0399	82.7973	42.586	0.34029	74.5798	0.010004	0	0	5.03368	6.76771	0	10.6259	0	2.98286	2.2293	20.0215	0	0.07503	0.815315	0	0.233427
330707	2002	330707	208513	4.51762e+06	10009.7	2002	1999	2001	0	0	0	0	0	0	0	3.59592	0.206314	17.1189	47.6044	35.1459	0.472303	0.56667	43.2435	4.73955	53.9042	46.8882	15.8197	51.4212	42.0399	82.7973	42.0625	0.34029	74.6999	0.010004	0	0	5.01534	6.84274	0	10.4475	0	2.98453	2.30204	19.9652	0	0.060024	0.890333	0	0.186741
330707	2003	330707	208513	4.51762e+06	10009.7	2003	1999	2001	0	0	0	0	0	0	0	3.59592	0.206314	17.1189	47.6044	35.1459	0.629737	0.558004	42.6401	5.95453	56.9034	47.0739	14.2257	50.6525	42.0399	82.7973	41.5391	0.34029	74.8199	0.010004	0	0	4.997	6.91777	0	10.2691	0	2.98619	2.37478	19.9088	0	0.045018	0.965352	0	0.140056
330707	2004	330707	208513	4.51762e+06	10009.7	2004	1999	2001	0	0	0	0	0	0	0	3.59592	0.206314	17.1189	47.6044	35.1459	0.787172	0.549338	42.0367	7.16951	59.9026	47.2596	12.6317	49.8838	42.0399	82.7973	41.0157	0.34029	74.94	0.010004	0	0	4.97866	6.9928	0	10.0907	0	2.98786	2.44752	19.8525	0	0.030012	1.04037	0	0.0933707
330707	2005	330707	208513	4.51762e+06	10009.7	2005	1999	2001	0	0	0	0	0	0	0	3.59592	0.206314	17.1189	47.6044	35.1459	0.944606	0.540671	41.4333	8.3845	62.9018	47.4453	11.0377	49.1151	42.0399	82.7973	40.4922	0.34029	75.06	0.010004	0	0	4.96032	7.06783	0	9.9123	0	2.98953	2.52025	19.7961	0	0.015006	1.11539	0	0.0466853
330707	2006	330707	208513	4.51762e+06	10009.7	2006	2009	2001	0	0	0	0	0	0	0	3.59592	0.206314	17.1189	47.6044	35.1459	1.10204	0.532005	40.8299	9.59948	65.901	47.631	9.44366	48.3464	42.0399	82.7973	39.9688	0.34029	75.1801	0.010004	0	0	4.94198	7.14286	0	9.73389	0	2.9912	2.59299	19.7397	0	0	1.19041	0	0
330707	2007	330707	208513	4.51762e+06	10009.7	2007	2009	2001	0	0	0	0	0	0	0	3.59592	0.206314	17.1189	47.6044	35.1459	1.25947	0.523338	40.2264	10.8145	68.9002	47.8167	7.84963	47.5777	42.0399	82.7973	39.4453	0.34029	75.1801	0.010004	0	0	4.94198	7.14286	0	9.73389	0	2.9912	2.59299	19.7397	0	0	1.19041	0	0
330707	2008	330707	208513	4.51762e+06	10009.7	2008	2009	2001	0	0	0	0	0	0	0	3.59592	0.206314	17.1189	47.6044	35.1459	1.57434	0.506006	39.0196	13.2444	74.8986	48.188	4.66159	46.0403	42.0399	82.7973	38.3985	0.34029	75.1801	0.010004	0	0	4.94198	7.14286	0	9.73389	0	2.9912	2.59299	19.7397	0	0	1.26543	0	0
330708	1979	330708	207829	4507636	10009.7	1979	1972	1981	0	1	0	0	0	0	0.3	36.2335	1.60128	26.6153	16.6211	13.6461	1.7	1.85195	50.0739	9.23237	20.5358	42.0924	45.5331	38.3264	37.9693	49.8171	34.1534	179.209	54.7059	0.375075	1.5253	0	6.18624	10.5671	1.37027	15.8532	7.4815	1.69034	3.7163	25.1012	0.002	1.85037	27.0604	0.555111	0.810162
330708	1980	330708	207829	4507636	10009.7	1980	1982	1981	0	1	0	0	0	0	0.3	36.3	1.60128	26.6153	16.6211	13.6461	1.582	1.83934	50.7831	9.83789	20.8043	42.0851	46.2814	37.3083	37.9693	49.8171	34.1534	179.209	55.2953	0.378647	1.5946	0	6.8528	9.80482	1.31455	15.7389	7.03569	1.70463	3.42755	25.635	0.004	1.62318	23.3604	0.595833	0.925899
330708	1981	330708	207829	4507636	10009.7	1981	1982	1981	0	0	0	0	0	0	0	36.1683	1.75716	25.5562	16.2801	14.2352	1.463	1.82672	51.4923	10.4434	21.0729	42.0778	47.0297	36.2903	37.9693	49.8171	34.1534	179.209	55.8847	0.382219	1.6639	0	7.51936	9.04252	1.25882	15.6246	6.58989	1.71892	3.1388	26.1687	0.006	1.39599	19.6604	0.636556	1.04164
330708	1982	330708	207829	4507636	10009.7	1982	1982	1981	0	0	0	0	0	0	0	36.0367	1.91304	24.4971	15.9391	14.8243	1.345	1.81411	52.2015	11.0489	21.3415	42.0705	47.778	35.2723	37.9693	49.8171	34.1534	179.209	56.4742	0.385791	1.7332	0	8.18592	8.28023	1.2031	15.5102	6.14409	1.7332	2.85005	26.7025	0.008	1.16881	15.9603	0.677278	1.15737
330708	1983	330708	207829	4507636	10009.7	1983	1982	1981	0	0	0	0	0	0	0	35.9051	2.06892	23.438	15.5981	15.4134	1.25	1.79742	47.6152	10.5947	21.5991	43.1629	47.7277	40.1231	35.9552	56.477	34.2282	153.741	57.0636	0.389364	1.8025	0	8.85248	7.51793	1.14737	15.3959	5.69828	1.74749	2.56129	27.2362	0.01	0.941617	12.2603	0.718001	1.27311
330708	1984	330708	207829	4507636	10009.7	1984	1982	1981	0	0	0	0	0	0	0	35.7734	2.2248	22.379	15.257	16.0024	1.15505	1.78072	43.0289	10.1406	21.8568	44.2554	47.6774	44.9739	33.941	63.1369	34.303	128.273	57.653	0.392936	1.8718	0	9.51905	6.75564	1.09165	15.2816	5.25248	1.76178	2.27254	27.7699	0.012	0.714429	8.56028	0.758723	1.38885
330708	1985	330708	207829	4507636	10009.7	1985	1982	1981	0	0	0	0	0	0	0	35.6418	2.38069	21.3199	14.916	16.5915	1.05992	1.76403	38.4426	9.6864	22.1144	45.3478	47.6271	49.8247	31.9268	69.7968	34.3779	102.805	58.2424	0.396508	1.9411	0	10.1856	5.99334	1.03592	15.1673	4.80668	1.77607	1.98379	28.3037	0.014	0.48724	4.86026	0.799446	1.50459
330708	1986	330708	207829	4507636	10009.7	1986	1989	1991	0	0	0	0	0	0	0	35.5101	2.53657	20.2608	14.575	17.1806	0.964783	1.74734	33.8564	9.23222	22.3721	46.4402	47.5768	54.6756	29.9127	76.4567	34.4527	77.3372	58.8318	0.40008	2.0104	0	10.8522	5.23105	0.980196	15.053	4.36087	1.79036	1.69503	28.8374	0.02	0.260052	1.16023	0.840168	1.62032
330708	1987	330708	207829	4507636	10009.7	1987	1989	1991	0	0	0	0	0	0	0	35.3785	2.69245	19.2018	14.2339	17.7697	0.86965	1.73065	29.2701	8.77804	22.6297	47.5327	47.5265	59.5264	27.8985	83.1166	34.5275	51.8693	57.7051	0.395793	2.05255	0	10.9715	5.2189	0.910182	15.9482	4.30229	2.04041	1.71521	29.0746	0.019	0.291487	1.3367	0.780156	1.53388
330708	1988	330708	207829	4507636	10009.7	1988	1989	1991	1	0	1	0	0	1.5	0	35.2469	2.84833	18.1427	13.8929	18.3588	0.774517	1.71395	24.6838	8.32386	22.8874	48.6251	47.4762	64.3772	25.8843	89.7765	34.6024	26.4014	56.5785	0.391507	2.0947	0	11.0908	5.20676	0.840168	16.8434	4.24371	2.29046	1.7354	29.3119	0	0.322922	1.51316	0.720144	1.44743
330708	1989	330708	207829	4507636	10009.7	1989	1989	1991	1	1	0	0	0	1	1.5	35.1152	3.00421	17.0836	13.5519	18.9479	0.679384	1.69726	20.0975	7.86969	23.145	49.7175	47.4259	69.228	23.8702	96.4364	34.6772	0.933477	55.4518	0.38722	2.13686	0	11.2101	5.19461	0.770154	17.7385	4.18512	2.54051	1.75558	29.5491	0	0.354357	1.68962	0.660132	1.36099
330708	1990	330708	207829	4507636	10009.7	1990	1989	1991	3	2	1	1	0	36.5	2.5	34.9836	3.1601	16.0245	13.2108	19.537	0.714712	1.64491	21.2851	7.44505	24.2559	49.8768	45.6704	68.6293	25.4186	95.5644	36.0406	0.911	54.3252	0.382934	2.17901	0	11.3294	5.18246	0.70014	18.6337	4.12654	2.79056	1.77576	29.7863	0	0.385791	1.86609	0.60012	1.27454
330708	1991	330708	207829	4507636	10009.7	1991	1989	1991	1	5	0	0	1	650	39	34.6654	3.09672	16.4797	15.8088	21.5934	0.75004	1.59255	22.4727	7.02041	25.3667	50.036	43.915	68.0305	26.9671	94.6925	37.404	0.888522	53.1985	0.378647	2.22116	0	11.4487	5.17032	0.630126	19.5289	4.06796	3.04061	1.79594	30.0236	0	0.417226	2.04255	0.540108	1.18809
330708	1992	330708	207829	4507636	10009.7	1992	1989	1991	0	6	0	0	0	0	689	34.3473	3.03334	16.9349	18.4068	23.6498	0.785368	1.54019	23.6603	6.59577	26.4775	50.1952	42.1596	67.4318	28.5155	93.8205	38.7674	0.866045	52.0718	0.374361	2.26331	0	11.568	5.15817	0.560112	20.4241	4.00937	3.29066	1.81612	30.2608	0	0.448661	2.21902	0.480096	1.10165
330708	1993	330708	207829	4507636	10009.7	1993	1989	1991	0	6	0	0	0	0	689	34.0291	2.96997	17.3901	21.0048	25.7062	0.820696	1.48784	24.848	6.17113	27.5884	50.3544	40.4041	66.8331	30.064	92.9486	40.1308	0.843568	50.9452	0.370074	2.30546	0	11.6873	5.14603	0.490098	21.3193	3.95079	3.54071	1.8363	30.498	0	0.480096	2.39548	0.420084	1.0152
330708	1994	330708	207829	4507636	10009.7	1994	1989	1991	0	5	0	0	0	0	687.5	33.711	2.90659	17.8453	23.6028	27.7626	0.856024	1.43548	26.0356	5.74649	28.6992	50.5136	38.6487	66.2343	31.6125	92.0766	41.4942	0.82109	49.8185	0.365787	2.34761	0	11.8066	5.13388	0.420084	22.2144	3.89221	3.79076	1.85648	30.7353	0	0.511531	2.57194	0.360072	0.928757
330708	1995	330708	207829	4507636	10009.7	1995	1989	1991	0	4	0	0	0	0	686.5	33.3929	2.84322	18.3004	26.2008	29.819	0.891352	1.38313	27.2232	5.32185	29.81	50.6729	36.8933	65.6356	33.1609	91.2047	42.8576	0.798613	48.6919	0.361501	2.38976	0	11.926	5.12174	0.35007	23.1096	3.83362	4.04081	1.87666	30.9725	0	0.542966	2.74841	0.30006	0.842311
330708	1996	330708	207829	4507636	10009.7	1996	1999	2001	0	1	0	0	0	0	650	33.0747	2.77984	18.7556	28.7988	31.8754	0.92668	1.33077	28.4108	4.89721	30.9209	50.8321	35.1378	65.0368	34.7094	90.3327	44.221	0.776136	47.5652	0.357214	2.43191	0	12.0453	5.10959	0.280056	24.0048	3.77504	4.29086	1.89684	31.2098	0	0.574401	2.92487	0.240048	0.755865
330708	1997	330708	207829	4507636	10009.7	1997	1999	2001	1	0	1	0	0	3	0	32.7566	2.71647	19.2108	31.3968	33.9318	0.962008	1.27842	29.5984	4.47258	32.0317	50.9913	33.3824	64.4381	36.2578	89.4608	45.5844	0.753659	46.4386	0.352928	2.47407	0	12.1646	5.09745	0.210042	24.9	3.71646	4.54091	1.91702	31.447	0	0.605835	3.10133	0.180036	0.66942
330708	1998	330708	207829	4507636	10009.7	1998	1999	2001	0	1	0	0	0	0	3	32.4384	2.65309	19.666	33.9948	35.9882	0.997336	1.22606	30.786	4.04794	33.1425	51.1505	31.627	63.8394	37.8063	88.5888	46.9477	0.731181	45.3119	0.348641	2.51622	0	12.2839	5.0853	0.140028	25.7952	3.65787	4.79096	1.9372	31.6842	0	0.63727	3.2778	0.120024	0.582974
330708	1999	330708	207829	4507636	10009.7	1999	1999	2001	0	1	0	0	0	0	3	32.1203	2.58972	20.1211	36.5928	38.0447	1.03266	1.17371	31.9736	3.6233	34.2534	51.3098	29.8715	63.2406	39.3548	87.7169	48.3111	0.708704	44.1853	0.344355	2.55837	0	12.4032	5.07316	0.070014	26.6903	3.59929	5.04101	1.95739	31.9215	0	0.668705	3.45426	0.060012	0.496528
330708	2000	330708	207829	4507636	10009.7	2000	1999	2001	0	1	0	0	0	0	3	31.8021	2.52634	20.5763	39.1908	40.1011	1.95141	1.10854	32.888	3.9602	37.5679	50.5286	27.1584	61.071	39.3548	87.7169	48.2941	0.708704	43.0586	0.340068	2.60052	0	12.5225	5.06101	0	27.5855	3.54071	5.29106	1.97757	32.1587	0	0.70014	3.63073	0	0.410082
330708	2001	330708	207829	4507636	10009.7	2001	1999	2001	3	1	1	0	0	2.85	3	31.8021	2.52634	20.5763	39.1908	40.1011	2.87015	1.04336	33.8025	4.29711	40.8824	49.7474	24.4453	58.9014	39.3548	87.7169	48.277	0.708704	42.9136	0.698473	2.57718	0	12.5175	5.12769	0	27.3438	3.53904	5.28272	1.96844	31.962	0	0.58345	3.13231	0.317414	0.341735
330708	2002	330708	207829	4507636	10009.7	2002	1999	2001	0	4	0	0	0	0	5.85	31.8021	2.52634	20.5763	39.1908	40.1011	3.78889	0.97819	34.7169	4.63401	44.1969	48.9662	21.7321	56.7318	39.3548	87.7169	48.26	0.708704	42.7686	1.05688	2.55384	0	12.5125	5.19437	0	27.1021	3.53737	5.27439	1.95932	31.7653	0	0.46676	2.63389	0.634828	0.273388
330708	2003	330708	207829	4507636	10009.7	2003	1999	2001	6	3	2	1	0	34.18	2.85	31.8021	2.52634	20.5763	39.1908	40.1011	4.70763	0.913018	35.6313	4.97092	47.5114	48.185	19.019	54.5621	39.3548	87.7169	48.2429	0.708704	42.6235	1.41528	2.53051	0	12.5075	5.26105	0	26.8604	3.53571	5.26605	1.95019	31.5686	0	0.35007	2.13548	0.952243	0.205041
330708	2004	330708	207829	4507636	10009.7	2004	1999	2001	1	9	1	0	0	3.9	37.03	31.8021	2.52634	20.5763	39.1908	40.1011	5.62637	0.847845	36.5458	5.30782	50.826	47.4038	16.3059	52.3925	39.3548	87.7169	48.2258	0.708704	42.4785	1.77369	2.50717	0	12.5025	5.32773	0	26.6187	3.53404	5.25772	1.94106	31.3719	0	0.23338	1.63706	1.26966	0.136694
330708	2005	330708	207829	4507636	10009.7	2005	1999	2001	2	10	0	0	0	0.2	40.93	31.8021	2.52634	20.5763	39.1908	40.1011	6.54511	0.782672	37.4602	5.64473	54.1405	46.6226	13.5927	50.2229	39.3548	87.7169	48.2088	0.708704	42.3335	2.13209	2.48383	0	12.4975	5.39441	0	26.3769	3.53237	5.24938	1.93194	31.1752	0	0.11669	1.13864	1.58707	0.068347
330708	2006	330708	207829	4507636	10009.7	2006	2009	2001	4	12	3	0	0	19.05	41.13	31.8021	2.52634	20.5763	39.1908	40.1011	7.46386	0.7175	38.3746	5.98163	57.455	45.8414	10.8796	48.0533	39.3548	87.7169	48.1917	0.708704	42.1884	2.4905	2.46049	0	12.4925	5.46109	0	26.1352	3.53071	5.24105	1.92281	30.9785	0	0	0.640225	1.90449	0
330708	2007	330708	207829	4507636	10009.7	2007	2009	2001	2	13	0	0	0	0.38	57.33	31.8021	2.52634	20.5763	39.1908	40.1011	8.3826	0.652327	39.2891	6.31854	60.7695	45.0602	8.16646	45.8837	39.3548	87.7169	48.1746	0.708704	42.1884	2.4905	2.46049	0	12.4925	5.46109	0	26.1352	3.53071	5.24105	1.92281	30.9785	0	0	0.640225	1.90449	0
330708	2008	330708	207829	4507636	10009.7	2008	2009	2001	1	15	0	0	0	0.8	57.71	31.8021	2.52634	20.5763	39.1908	40.1011	10.2201	0.521982	41.1179	6.99235	67.3986	43.4978	2.74019	41.5445	39.3548	87.7169	48.1405	0.708704	42.1884	2.4905	2.46049	0	12.4925	5.46109	0	26.1352	3.53071	5.24105	1.92281	30.9785	0	0	0.141808	2.2219	0
330709	1979	330709	207147	4.49765e+06	10009.6	1979	1972	1981	0	3	0	0	0	0	10.1	19.1247	1.85339	26.7574	16.1612	11.1521	1.834	2.10797	47.1997	10.3161	19.728	38.3606	38.7506	39.9703	48.232	55.6952	36.095	188.517	31.4694	0.0850255	0	0	13.7141	29.7139	0	13.5041	10.4631	0.840252	11.4191	21.3526	0.154	0.220066	16.4799	0.0650195	0.30009
330709	1980	330709	207147	4.49765e+06	10009.6	1980	1982	1981	0	3	0	0	0	0	10.1	19.1507	1.85339	26.7574	16.1612	11.1521	1.752	2.07607	48.263	10.4806	20.5091	38.1686	38.875	39.0067	48.232	55.6952	36.095	188.517	30.6735	0.097172	0	0	15.5332	29.3259	0	13.7384	9.47284	0.954572	11.9974	21.9709	0.148	0.251504	14.5629	0.074308	0.34296
330709	1981	330709	207147	4.49765e+06	10009.6	1981	1982	1981	1	3	1	0	0	3	10.1	19.0998	2.03622	25.8547	15.8608	11.6305	1.67	2.04417	49.3263	10.6452	21.2902	37.9766	38.9994	38.0431	48.232	55.6952	36.095	188.517	29.8775	0.109318	0	0	17.3523	28.938	0	13.9728	8.48254	1.06889	12.5757	22.5892	0.142	0.282942	12.6459	0.0835965	0.38583
330709	1982	330709	207147	4.49765e+06	10009.6	1982	1982	1981	0	4	0	0	0	0	13.1	19.0488	2.21905	24.9521	15.5604	12.1089	1.588	2.01227	50.3896	10.8098	22.0713	37.7846	39.1239	37.0795	48.232	55.6952	36.095	188.517	29.0816	0.121465	0	0	19.1715	28.55	0	14.2071	7.49225	1.18321	13.154	23.2075	0.136	0.31438	10.7289	0.092885	0.4287
330709	1983	330709	207147	4.49765e+06	10009.6	1983	1982	1981	0	1	0	0	0	0	3	18.9979	2.40188	24.0495	15.2599	12.5873	1.476	2.00946	45.7281	10.1221	21.979	39.2657	39.8861	42.2771	43.8513	61.7385	36.2444	161.739	28.2856	0.133611	0	0	20.9906	28.162	0	14.4415	6.50195	1.29753	13.7323	23.8258	0.13	0.345818	8.81193	0.102174	0.47157
330709	1984	330709	207147	4.49765e+06	10009.6	1984	1982	1981	0	1	0	0	0	0	3	18.947	2.5847	23.1468	14.9595	13.0657	1.3638	2.00666	41.0666	9.43448	21.8868	40.7468	40.6483	47.4747	39.4705	67.7818	36.3937	134.96	27.4897	0.145758	0	0	22.8097	27.774	0	14.6758	5.51165	1.41185	14.3106	24.444	0.124	0.377256	6.89493	0.111462	0.51444
330709	1985	330709	207147	4.49765e+06	10009.6	1985	1982	1981	0	1	0	0	0	0	3	18.896	2.76753	22.2442	14.6591	13.5441	1.25147	2.00385	36.4051	8.74684	21.7946	42.2279	41.4105	52.6723	35.0898	73.825	36.5431	108.182	26.6937	0.157905	0	0	24.6288	27.3861	0	14.9102	4.52136	1.52617	14.8889	25.0623	0.118	0.408694	4.97792	0.12075	0.55731
330709	1986	330709	207147	4.49765e+06	10009.6	1986	1989	1991	0	1	0	0	0	0	3	18.8451	2.95036	21.3415	14.3586	14.0225	1.13915	2.00105	31.7436	8.05919	21.7024	43.709	42.1727	57.8699	30.709	79.8683	36.6924	81.4033	25.8978	0.170051	0	0	26.4479	26.9981	0	15.1445	3.53106	1.64049	15.4672	25.6806	0.1	0.440132	3.06092	0.130039	0.60018
330709	1987	330709	207147	4.49765e+06	10009.6	1987	1989	1991	0	0	0	0	0	0	0	18.7941	3.13319	20.4389	14.0582	14.501	1.02682	1.99824	27.0822	7.37155	21.6101	45.19	42.9349	63.0675	26.3283	85.9116	36.8418	54.6248	25.4948	0.165764	0	0	26.1228	27.0631	0	15.0038	3.7647	2.21709	15.3121	25.3042	0.098	0.459423	3.70397	0.12075	0.655196
330709	1988	330709	207147	4.49765e+06	10009.6	1988	1989	1991	0	0	0	0	0	0	0	18.7432	3.31602	19.5362	13.7578	14.9794	0.914495	1.99544	22.4207	6.6839	21.5179	46.6711	43.6971	68.2651	21.9475	91.9549	36.9911	27.8462	25.0918	0.161477	0	0	25.7977	27.1281	0	14.863	3.99834	2.7937	15.1571	24.9278	0.108	0.478715	4.34702	0.111462	0.710213
330709	1989	330709	207147	4.49765e+06	10009.6	1989	1989	1991	0	0	0	0	0	0	0	18.6923	3.49885	18.6336	13.4574	15.4578	0.802169	1.99263	17.7592	5.99626	21.4257	48.1522	44.4593	73.4627	17.5668	97.9982	37.1405	1.06769	24.6888	0.15719	0	0	25.4726	27.1932	0	14.7223	4.23198	3.3703	15.002	24.5515	0.107	0.498007	4.99007	0.102174	0.76523
330709	1990	330709	207147	4.49765e+06	10009.6	1990	1989	1991	0	0	0	0	0	0	0	18.6413	3.68168	17.7309	13.1569	15.9362	0.843882	1.93207	18.7051	5.86157	22.4943	48.702	42.9551	72.7945	19.4894	97.2086	38.0115	1.03895	24.2859	0.152903	0	0	25.1475	27.2582	0	14.5815	4.46563	3.9469	14.847	24.1751	0.106	0.517298	5.63312	0.092885	0.820246
330709	1991	330709	207147	4.49765e+06	10009.6	1991	1989	1991	0	0	0	0	0	0	0	18.4338	3.60746	17.9415	16.0792	18.1077	0.885595	1.87152	19.6509	5.72689	23.5629	49.2518	41.4509	72.1263	21.412	96.419	38.8826	1.01021	23.8829	0.148616	0	0	24.8224	27.3232	0	14.4408	4.69927	4.5235	14.692	23.7987	0.104	0.53659	6.27617	0.0835965	0.875263
330709	1992	330709	207147	4.49765e+06	10009.6	1992	1989	1991	0	0	0	0	0	0	0	18.2263	3.53325	18.152	19.0015	20.2792	0.927307	1.81096	20.5968	5.5922	24.6315	49.8016	39.9467	71.4581	23.3347	95.6294	39.7536	0.981464	23.4799	0.144329	0	0	24.4973	27.3882	0	14.3	4.93291	5.1001	14.5369	23.4223	0.103	0.555881	6.91922	0.074308	0.930279
330709	1993	330709	207147	4.49765e+06	10009.6	1993	1989	1991	0	0	0	0	0	0	0	18.0187	3.45903	18.3626	21.9237	22.4507	0.96902	1.75041	21.5427	5.45752	25.7001	50.3514	38.4426	70.7899	25.2573	94.8398	40.6247	0.952722	23.0769	0.140042	0	0	24.1723	27.4532	0	14.1592	5.16655	5.6767	14.3819	23.046	0.101	0.575172	7.56227	0.0650195	0.985295
330709	1994	330709	207147	4.49765e+06	10009.6	1994	1989	1991	0	0	0	0	0	0	0	17.8112	3.38482	18.5731	24.846	24.6222	1.01073	1.68985	22.4886	5.32283	26.7688	50.9012	36.9384	70.1217	27.18	94.0503	41.4957	0.92398	22.6739	0.135755	0	0	23.8472	27.5183	0	14.0185	5.40019	6.2533	14.2269	22.6696	0.1	0.594464	8.20532	0.055731	1.04031
330709	1995	330709	207147	4.49765e+06	10009.6	1995	1989	1991	0	0	0	0	0	0	0	17.6037	3.3106	18.7837	27.7683	26.7937	1.05245	1.62929	23.4344	5.18815	27.8374	51.451	35.4342	69.4535	29.1026	93.2607	42.3667	0.895238	22.271	0.131468	0	0	23.5221	27.5833	0	13.8777	5.63383	6.82991	14.0718	22.2932	0.098	0.613756	8.84837	0.0464425	1.09533
330709	1996	330709	207147	4.49765e+06	10009.6	1996	1999	2001	0	0	0	0	0	0	0	17.3961	3.23639	18.9942	30.6905	28.9652	1.09416	1.56874	24.3803	5.05346	28.906	52.0008	33.93	68.7853	31.0252	92.4711	43.2378	0.866496	21.868	0.127181	0	0	23.197	27.6483	0	13.737	5.86747	7.40651	13.9168	21.9168	0.097	0.633047	9.49142	0.037154	1.15034
330709	1997	330709	207147	4.49765e+06	10009.6	1997	1999	2001	0	0	0	0	0	0	0	17.1886	3.16217	19.2048	33.6128	31.1367	1.13587	1.50818	25.3262	4.91877	29.9746	52.5507	32.4258	68.1171	32.9479	91.6815	44.1088	0.837754	21.465	0.122894	0	0	22.8719	27.7133	0	13.5962	6.10112	7.98311	13.7618	21.5404	0.096	0.652339	10.1345	0.0278655	1.20536
330709	1998	330709	207147	4.49765e+06	10009.6	1998	1999	2001	0	0	0	0	0	0	0	16.9811	3.08795	19.4154	36.535	33.3081	1.17758	1.44762	26.272	4.78409	31.0432	53.1005	30.9216	67.4489	34.8705	90.8919	44.9799	0.809012	21.062	0.118607	0	0	22.5468	27.7783	0	13.4555	6.33476	8.55971	13.6067	21.1641	0.094	0.67163	10.7775	0.018577	1.26038
330709	1999	330709	207147	4.49765e+06	10009.6	1999	1999	2001	0	0	0	0	0	0	0	16.7735	3.01374	19.6259	39.4573	35.4796	1.2193	1.38707	27.2179	4.6494	32.1119	53.6503	29.4174	66.7807	36.7931	90.1023	45.8509	0.78027	20.6591	0.11432	0	0	22.2217	27.8434	0	13.3147	6.5684	9.13631	13.4517	20.7877	0.093	0.690921	11.4206	0.0092885	1.31539
330709	2000	330709	207147	4.49765e+06	10009.6	2000	1999	2001	0	0	0	0	0	0	0	16.566	2.93952	19.8365	42.3796	37.6511	1.51021	1.31334	26.3562	4.57506	31.6051	54.8464	26.7772	67.4269	36.7931	90.1023	46.0306	0.78027	20.2561	0.110033	0	0	21.8966	27.9084	0	13.174	6.80204	9.71291	13.2966	20.4113	0.11	0.710213	12.0636	0	1.37041
330709	2001	330709	207147	4.49765e+06	10009.6	2001	1999	2001	0	0	0	0	0	0	0	16.566	2.93952	19.8365	42.3796	37.6511	1.80112	1.23962	25.4944	4.50072	31.0983	56.0426	24.1371	68.0731	36.7931	90.1023	46.2103	0.78027	20.2544	0.213397	0.0116702	0	21.8966	27.8267	0	13.1656	6.78704	9.70458	13.1884	20.413	0.11	0.591844	10.069	0.0927314	1.15187
330709	2002	330709	207147	4.49765e+06	10009.6	2002	1999	2001	0	0	0	0	0	0	0	16.566	2.93952	19.8365	42.3796	37.6511	2.09204	1.16589	24.6327	4.42638	30.5915	57.2388	21.4969	68.7194	36.7931	90.1023	46.3901	0.78027	20.2527	0.316762	0.0233403	0	21.8966	27.745	0	13.1573	6.77203	9.69624	13.0801	20.4147	0.11	0.473475	8.07442	0.185463	0.933321
330709	2003	330709	207147	4.49765e+06	10009.6	2003	1999	2001	0	0	0	0	0	0	0	16.566	2.93952	19.8365	42.3796	37.6511	2.38295	1.09216	23.771	4.35203	30.0847	58.4349	18.8567	69.3656	36.7931	90.1023	46.5698	0.78027	20.2511	0.420126	0.0350105	0	21.8966	27.6633	0	13.1489	6.75703	9.68791	12.9718	20.4164	0.11	0.355106	6.07983	0.278194	0.714776
330709	2004	330709	207147	4.49765e+06	10009.6	2004	1999	2001	0	0	0	0	0	0	0	16.566	2.93952	19.8365	42.3796	37.6511	2.67386	1.01844	22.9092	4.27769	29.5779	59.6311	16.2166	70.0118	36.7931	90.1023	46.7495	0.78027	20.2494	0.52349	0.0466807	0	21.8966	27.5816	0	13.1406	6.74202	9.67957	12.8636	20.4181	0.11	0.236738	4.08523	0.370926	0.496231
330709	2005	330709	207147	4.49765e+06	10009.6	2005	1999	2001	0	0	0	0	0	0	0	16.566	2.93952	19.8365	42.3796	37.6511	2.96478	0.944713	22.0475	4.20335	29.0711	60.8272	13.5764	70.6581	36.7931	90.1023	46.9292	0.78027	20.2477	0.626855	0.0583508	0	21.8966	27.4999	0	13.1323	6.72702	9.67123	12.7553	20.4198	0.11	0.118369	2.09063	0.463657	0.277686
330709	2006	330709	207147	4.49765e+06	10009.6	2006	2009	2001	0	0	0	0	0	0	0	16.566	2.93952	19.8365	42.3796	37.6511	3.25569	0.870987	21.1858	4.12901	28.5643	62.0234	10.9362	71.3043	36.7931	90.1023	47.1089	0.78027	20.2461	0.730219	0.070021	0	21.8966	27.4182	0	13.1239	6.71201	9.6629	12.647	20.4215	0.11	0	0.0960369	0.556388	0.0591414
330709	2007	330709	207147	4.49765e+06	10009.6	2007	2009	2001	0	0	0	0	0	0	0	16.566	2.93952	19.8365	42.3796	37.6511	3.5466	0.797262	20.324	4.05466	28.0575	63.2196	8.29608	71.9505	36.7931	90.1023	47.2887	0.78027	20.2461	0.730219	0.070021	0	21.8966	27.4182	0	13.1239	6.71201	9.6629	12.647	20.4215	0.11	0	0.0960369	0.556388	0.0591414
330709	2008	330709	207147	4.49765e+06	10009.6	2008	2009	2001	4	0	0	0	0	1.02	0	16.566	2.93952	19.8365	42.3796	37.6511	4.12843	0.649811	18.6006	3.90598	27.0439	65.6119	3.01575	73.243	36.7931	90.1023	47.6481	0.78027	20.2461	0.730219	0.070021	0	21.8966	27.4182	0	13.1239	6.71201	9.6629	12.647	20.4215	0.11	0	0	0.64912	0
330710	1979	330710	206467	4487673	10009.6	1979	1972	1981	0	2	0	0	0	0	119	3.06086	0.09152	76.8763	4.78988	3.19498	0	2.62458	43.248	9.21196	17.9466	49.9657	7.28825	47.0803	61.5114	91.9596	19.1537	12.5892	13.3167	0.44022	0.475237	0	4.51726	36.6983	0.0550275	15.7129	26.8234	1.35568	19.5873	16.6125	0.192	0.475237	12.046	0.195098	0.195098
330710	1980	330710	206467	4487673	10009.6	1980	1982	1981	3	2	0	2	1	690	119	2.90119	0.09152	76.8763	4.78988	3.19498	0	2.53267	47.391	8.06148	19.7113	50.5372	6.83102	44.1964	61.5114	91.9596	19.1537	12.5892	12.9879	0.443079	0.425927	0	4.46652	36.3968	0.0628886	15.6178	27.4537	1.54935	20.0249	16.6307	0.214	0.467376	11.177	0.198671	0.222969
330710	1981	330710	206467	4487673	10009.6	1981	1982	1981	1	4	1	0	0	2	790	2.83373	0.132368	74.6915	4.98664	4.30553	0	2.44077	51.534	6.91101	21.4761	51.1086	6.37379	41.3125	61.5114	91.9596	19.1537	12.5892	12.6592	0.445937	0.376617	0	4.41578	36.0952	0.0707496	15.5228	28.084	1.74301	20.4625	16.6489	0.236	0.459515	10.308	0.202244	0.25084
330710	1982	330710	206467	4487673	10009.6	1982	1982	1981	1	5	0	0	0	0.5	792	2.76627	0.173216	72.5067	5.1834	5.41609	0	2.34886	55.677	5.76053	23.2408	51.6801	5.91656	38.4285	61.5114	91.9596	19.1537	12.5892	12.3305	0.448796	0.327306	0	4.36504	35.7936	0.0786107	15.4277	28.7144	1.93668	20.9001	16.6671	0.258	0.451654	9.439	0.205817	0.278711
330710	1983	330710	206467	4487673	10009.6	1983	1982	1981	6	5	2	2	0	54.6	692.5	2.69881	0.214065	70.3219	5.38016	6.52665	0	2.38333	49.3552	5.21075	22.5339	53.5827	7.57035	45.1052	53.0172	92.9126	19.2096	10.8772	12.0017	0.451654	0.277996	0	4.3143	35.492	0.0864718	15.3327	29.3447	2.13035	21.3376	16.6853	0.28	0.443793	8.57	0.20939	0.306582
330710	1984	330710	206467	4487673	10009.6	1984	1982	1981	2	11	1	0	1	563.5	747.1	2.63135	0.254913	68.1372	5.57692	7.6372	1.05e-05	2.41779	43.0334	4.66097	21.8271	55.4852	9.22414	51.782	44.523	93.8657	19.2654	9.16513	11.673	0.454513	0.228686	0	4.26356	35.1905	0.0943329	15.2376	29.975	2.32402	21.7752	16.7035	0.302	0.435932	7.70099	0.212964	0.334453
330710	1985	330710	206467	4487673	10009.6	1985	1982	1981	5	13	1	3	1	3306	1310.6	2.5639	0.295761	65.9524	5.77368	8.74775	1.58e-05	2.45226	36.7116	4.1112	21.1203	57.3878	10.8779	58.4587	36.0288	94.8187	19.3213	7.45311	11.3442	0.457371	0.179375	0	4.21282	34.8889	0.102194	15.1426	30.6053	2.51769	22.2128	16.7217	0.324	0.428071	6.83199	0.216537	0.362324
330710	1986	330710	206467	4487673	10009.6	1986	1989	1991	3	15	1	1	1	428	3926.6	2.49644	0.336609	63.7676	5.97044	9.85831	2.1e-05	2.48673	30.3897	3.56142	20.4134	59.2904	12.5317	65.1354	27.5345	95.7717	19.3771	5.74109	11.0155	0.46023	0.130065	0	4.16208	34.5873	0.110055	15.0475	31.2356	2.71136	22.6504	16.7399	0.39	0.42021	5.96298	0.22011	0.390195
330710	1987	330710	206467	4487673	10009.6	1987	1989	1991	7	17	2	0	0	6.3	4352.6	2.42898	0.377457	61.5828	6.16721	10.9689	2.63e-05	2.52119	24.0679	3.01164	19.7066	61.1929	14.1855	71.8121	19.0403	96.7248	19.433	4.02907	10.5388	0.427356	0.120775	0	4.15565	34.2743	0.12006	14.9653	31.6623	2.98292	22.8186	16.4686	0.388	0.435932	6.17237	0.272279	0.461659
330710	1988	330710	206467	4487673	10009.6	1988	1989	1991	8	23	1	1	0	89.7	4358.4	2.36152	0.418306	59.3981	6.36397	12.0794	3.15e-05	2.55566	17.7461	2.46186	18.9997	63.0955	15.8393	78.4888	10.5461	97.6778	19.4888	2.31705	10.0622	0.394483	0.111484	0	4.14922	33.9613	0.130065	14.8832	32.0889	3.25448	22.9869	16.1973	0.478	0.451654	6.38176	0.324448	0.533124
330710	1989	330710	206467	4487673	10009.6	1989	1989	1991	10	25	3	2	3	1829.5	4393.5	2.29406	0.459154	57.2133	6.56073	13.19	3.68e-05	2.59012	11.4242	1.91209	18.2929	64.9981	17.4931	85.1655	2.05192	98.6308	19.5447	0.605028	9.58551	0.361609	0.102194	0	4.14279	33.6483	0.14007	14.801	32.5155	3.52605	23.1551	15.926	0.477	0.467376	6.59115	0.376617	0.604588
330710	1990	330710	206467	4487673	10009.6	1990	1989	1991	8	33	3	1	0	62.5	5659.5	2.2266	0.500002	55.0285	6.75749	14.3005	3.31e-05	2.46862	13.2886	1.83337	19.658	65.0873	16.9507	83.5162	4.33121	98.3404	20.0502	0.595888	9.10884	0.328736	0.0929036	0	4.13635	33.3352	0.150075	14.7188	32.9422	3.79761	23.3233	15.6548	0.475	0.483099	6.80054	0.428786	0.676052
330710	1991	330710	206467	4487673	10009.6	1991	1989	1991	2	36	2	0	0	11	2416	2.15519	0.47307	51.0578	12.8617	14.545	2.94e-05	2.34712	15.153	1.75466	21.0231	65.1766	16.4083	81.8669	6.6105	98.0501	20.5557	0.586748	8.63217	0.295862	0.0836132	0	4.12992	33.0222	0.16008	14.6366	33.3688	4.06918	23.4915	15.3835	0.474	0.498821	7.00993	0.480955	0.747516
330710	1992	330710	206467	4487673	10009.6	1992	1989	1991	6	35	3	2	0	91.4	1999	2.08378	0.446139	47.0871	18.9659	14.7894	2.58e-05	2.22562	17.0173	1.67594	22.3881	65.2659	15.8658	80.2175	8.88979	97.7597	21.0612	0.577607	8.15551	0.262989	0.0743229	0	4.12349	32.7092	0.170085	14.5544	33.7955	4.34074	23.6597	15.1122	0.472	0.514543	7.21932	0.533124	0.818981
330710	1993	330710	206467	4487673	10009.6	1993	1989	1991	4	34	2	0	0	11.9	2084.1	2.01237	0.419207	43.1164	25.0702	15.0338	2.21e-05	2.10412	18.8817	1.59723	23.7532	65.3551	15.3234	78.5682	11.1691	97.4693	21.5667	0.568467	7.67884	0.230115	0.0650325	0	4.11706	32.3962	0.18009	14.4722	34.2221	4.61231	23.828	14.841	0.471	0.530265	7.42871	0.585292	0.890445
330710	1994	330710	206467	4487673	10009.6	1994	1989	1991	8	30	0	1	1	234	2006.3	1.94096	0.392275	39.1457	31.1744	15.2783	1.84e-05	1.98262	20.7461	1.51851	25.1183	65.4444	14.781	76.9189	13.4484	97.1789	22.0722	0.559327	7.20217	0.197241	0.0557421	0	4.11063	32.0832	0.190095	14.3901	34.6488	4.88387	23.9962	14.5697	0.47	0.545987	7.6381	0.637461	0.961909
330710	1995	330710	206467	4487673	10009.6	1995	1989	1991	4	28	2	0	0	4.1	410.8	1.86955	0.365343	35.175	37.2786	15.5227	1.47e-05	1.86111	22.6104	1.43979	26.4834	65.5337	14.2386	75.2696	15.7277	96.8885	22.5777	0.550187	6.72551	0.164368	0.0464518	0	4.10419	31.7702	0.2001	14.3079	35.0754	5.15544	24.1644	14.2984	0.468	0.561709	7.84749	0.68963	1.03337
330710	1996	330710	206467	4487673	10009.6	1996	1999	2001	5	24	1	0	0	4.4	352.4	1.79813	0.338412	31.2044	43.3828	15.7672	1.1e-05	1.73961	24.4748	1.36108	27.8484	65.6229	13.6962	73.6203	18.0069	96.5981	23.0831	0.541047	6.24884	0.131494	0.0371614	0	4.09776	31.4572	0.210105	14.2257	35.502	5.427	24.3326	14.0271	0.467	0.577431	8.05689	0.741799	1.10484
330710	1997	330710	206467	4487673	10009.6	1997	1999	2001	5	27	2	0	0	4.1	345.8	1.72672	0.31148	27.2337	49.487	16.0116	7.36e-06	1.61811	26.3391	1.28236	29.2135	65.7122	13.1538	71.9709	20.2862	96.3077	23.5886	0.531906	5.77217	0.0986207	0.0278711	0	4.09133	31.1441	0.22011	14.1435	35.9287	5.69856	24.5008	13.7559	0.465	0.593154	8.26628	0.793968	1.1763
330710	1998	330710	206467	4487673	10009.6	1998	1999	2001	4	26	4	0	0	20.5	258.5	1.65531	0.284548	23.263	55.5913	16.256	3.68e-06	1.49661	28.2035	1.20365	30.5786	65.8015	12.6114	70.3216	22.5655	96.0173	24.0941	0.522766	5.2955	0.0657471	0.0185807	0	4.0849	30.8311	0.230115	14.0613	36.3553	5.97013	24.6691	13.4846	0.464	0.608876	8.47567	0.846137	1.24777
330710	1999	330710	206467	4487673	10009.6	1999	1999	2001	8	26	4	0	0	18.9	267.1	1.5839	0.257617	19.2923	61.6955	16.5005	0	1.37511	30.0679	1.12493	31.9437	65.8907	12.0689	68.6723	24.8448	95.7269	24.5996	0.513626	4.81884	0.0328736	0.00929036	0	4.07847	30.5181	0.24012	13.9791	36.782	6.24169	24.8373	13.2133	0.462	0.624598	8.68506	0.898306	1.31923
330710	2000	330710	206467	4487673	10009.6	2000	1999	2001	9	26	4	0	1	132.6	52	1.51249	0.230685	15.3216	67.7997	16.7449	0.794733	1.33131	31.4932	1.60051	33.2668	66.0387	11.0177	65.9781	24.8448	95.7269	24.3471	0.513626	4.34217	0	0	0	4.07204	30.2051	0.250125	13.8969	37.2086	6.51326	25.0055	12.9421	0.48	0.64032	8.89445	0.950475	1.3907
330710	2001	330710	206467	4487673	10009.6	2001	1999	2001	4	31	4	0	0	17.5	180.5	1.51249	0.230685	15.3216	67.7997	16.7449	1.58947	1.28752	32.9185	2.07609	34.59	66.1866	9.9665	63.284	24.8448	95.7269	24.0945	0.513626	4.33884	0	0	0	4.07037	30.2018	0.248457	13.8986	37.2153	6.51492	25.0024	12.9404	0.48	0.5336	7.41204	0.792063	1.15891
330710	2002	330710	206467	4487673	10009.6	2002	1999	2001	10	30	4	0	0	16.75	193.6	1.51249	0.230685	15.3216	67.7997	16.7449	2.3842	1.24373	34.3438	2.55167	35.9132	66.3345	8.91528	60.5898	24.8448	95.7269	23.842	0.513626	4.3355	0	0	0	4.0687	30.1984	0.24679	13.9003	37.2219	6.51659	24.9992	12.9388	0.48	0.42688	5.92963	0.63365	0.92713
330710	2003	330710	206467	4487673	10009.6	2003	1999	2001	6	35	2	0	1	2411.38	206.25	1.51249	0.230685	15.3216	67.7997	16.7449	3.17893	1.19993	35.7691	3.02726	37.2363	66.4825	7.86406	57.8957	24.8448	95.7269	23.5894	0.513626	4.33217	0	0	0	4.06703	30.1951	0.245122	13.902	37.2286	6.51826	24.996	12.9371	0.48	0.32016	4.44722	0.475238	0.695348
330710	2004	330710	206467	4487673	10009.6	2004	1999	2001	1	37	0	0	0	0.7	2597.13	1.51249	0.230685	15.3216	67.7997	16.7449	3.97366	1.15614	37.1944	3.50284	38.5595	66.6304	6.81284	55.2015	24.8448	95.7269	23.3368	0.513626	4.32883	0	0	0	4.06537	30.1918	0.243455	13.9036	37.2353	6.51993	24.9929	12.9355	0.48	0.21344	2.96482	0.316825	0.463565
330710	2005	330710	206467	4487673	10009.6	2005	1999	2001	6	30	1	0	0	6.04	2578.93	1.51249	0.230685	15.3216	67.7997	16.7449	4.7684	1.11235	38.6198	3.97842	39.8827	66.7783	5.76162	52.5074	24.8448	95.7269	23.0843	0.513626	4.3255	0	0	0	4.0637	30.1884	0.241787	13.9053	37.242	6.52159	24.9897	12.9339	0.48	0.10672	1.48241	0.158413	0.231783
330710	2006	330710	206467	4487673	10009.6	2006	2009	2001	5	27	0	0	0	1.79	2452.37	1.51249	0.230685	15.3216	67.7997	16.7449	5.56313	1.06856	40.0451	4.454	41.2058	66.9263	4.7104	49.8132	24.8448	95.7269	22.8317	0.513626	4.32216	0	0	0	4.06203	30.1851	0.24012	13.907	37.2486	6.52326	24.9866	12.9322	0.48	0	0	0	0
330710	2007	330710	206467	4487673	10009.6	2007	2009	2001	7	28	2	1	0	23.71	2436.66	1.51249	0.230685	15.3216	67.7997	16.7449	6.35786	1.02476	41.4704	4.92958	42.529	67.0742	3.65918	47.1191	24.8448	95.7269	22.5792	0.513626	4.32216	0	0	0	4.06203	30.1851	0.24012	13.907	37.2486	6.52326	24.9866	12.9322	0.48	0	0	0	0
330710	2008	330710	206467	4487673	10009.6	2008	2009	2001	2	25	0	0	0	0.66	2443.62	1.51249	0.230685	15.3216	67.7997	16.7449	7.94733	0.937177	44.321	5.88074	45.1753	67.3701	1.55674	41.7308	24.8448	95.7269	22.074	0.513626	4.32216	0	0	0	4.06203	30.1851	0.24012	13.907	37.2486	6.52326	24.9866	12.9322	0.48	0	0	0	0
330711	1979	330711	205787	4.47769e+06	10010	1979	1972	1981	0	2	0	0	0	0	84	5.18811	0.19172	69.9065	4.06396	1.69318	0	2.90885	33.8964	11.6584	4.85532	55.3993	32.3244	53.9962	44.2731	89.1708	13.4116	10.5175	11.3773	0	26.1202	0.120024	19.2088	11.3923	4.0108	3.86577	13.0576	10.8472	5.4246	6.98117	0.012	19.0538	12.5925	0	3.79076
330711	1980	330711	205787	4.47769e+06	10010	1980	1982	1981	0	2	0	0	0	0	84	4.97595	0.19172	69.9065	4.06396	1.69318	0	2.89588	37.2566	8.82717	5.06993	56.3133	32.5034	53.5719	44.2731	89.1708	13.4116	10.5175	9.8434	0	25.3351	0.102878	20.557	11.0551	4.58377	4.06081	13.3612	11.1008	5.70002	6.65806	0.024	17.3263	10.9922	0	3.83934
330711	1981	330711	205787	4.47769e+06	10010	1981	1982	1981	0	2	0	0	0	0	84	4.89514	0.228521	67.881	4.81034	2.63415	0	2.8829	40.6169	5.99596	5.28454	57.2273	32.6823	53.1475	44.2731	89.1708	13.4116	10.5175	8.30952	0	24.5499	0.0857314	21.9051	10.7179	5.15675	4.25585	13.6649	11.3544	5.97544	6.33495	0.036	15.5988	9.39188	0	3.88792
330711	1982	330711	205787	4.47769e+06	10010	1982	1982	1981	0	2	0	0	0	0	84	4.81432	0.265323	65.8555	5.55671	3.57513	0	2.86992	43.9771	3.16475	5.49915	58.1413	32.8613	52.7232	44.2731	89.1708	13.4116	10.5175	6.77564	0	23.7648	0.0685851	23.2532	10.3806	5.72972	4.45089	13.9685	11.608	6.25086	6.01184	0.048	13.8713	7.79156	0	3.9365
330711	1983	330711	205787	4.47769e+06	10010	1983	1982	1981	0	1	0	0	0	0	1	4.7335	0.302125	63.83	6.30308	4.51611	0.024	2.89101	38.8051	3.04856	5.7717	59.1051	33.6388	57.7588	38.0099	90.3237	13.2681	9.08155	5.24176	0	22.9796	0.0514389	24.6013	10.0434	6.30269	4.64593	14.2721	11.8617	6.52628	5.68873	0.06	12.1439	6.19124	0	3.98508
330711	1984	330711	205787	4.47769e+06	10010	1984	1982	1981	0	0	0	0	0	0	0	4.65269	0.338926	61.8045	7.04945	5.45708	0.047672	2.9121	33.633	2.93237	6.04425	60.0688	34.4164	62.7944	31.7468	91.4765	13.1246	7.64563	3.70788	0	22.1944	0.0342926	25.9495	9.70623	6.87566	4.84097	14.5758	12.1153	6.8017	5.36562	0.072	10.4164	4.59092	0	4.03366
330711	1985	330711	205787	4.47769e+06	10010	1985	1982	1981	0	0	0	0	0	0	0	4.57187	0.375727	59.7791	7.79582	6.39806	0.071508	2.93319	28.4609	2.81618	6.3168	61.0325	35.194	67.8299	25.4836	92.6294	12.9811	6.2097	2.17401	0	21.4093	0.0171463	27.2976	9.36902	7.44863	5.03601	14.8794	12.3689	7.07712	5.0425	0.084	8.68888	2.9906	0	4.08224
330711	1986	330711	205787	4.47769e+06	10010	1986	1989	1991	0	0	0	0	0	0	0	4.49105	0.412529	57.7536	8.5422	7.33904	0.095344	2.95428	23.2888	2.7	6.58935	61.9963	35.9715	72.8655	19.2205	93.7823	12.8376	4.77378	0.640128	0	20.6241	0	28.6457	9.03181	8.0216	5.23105	15.183	12.6225	7.35254	4.71939	0.12	6.96139	1.39028	0	4.13083
330711	1987	330711	205787	4.47769e+06	10010	1987	1989	1991	0	0	0	0	0	0	0	4.41024	0.449331	55.7281	9.28857	8.28001	0.11918	2.97537	18.1167	2.58381	6.8619	62.96	36.7491	77.9011	12.9573	94.9351	12.694	3.33785	0.594405	0	20.0776	0	28.1349	9.09039	7.9223	5.27105	16.1697	12.5954	7.31806	4.67773	0.118	6.56203	1.54245	0.00857314	4.2137
330711	1988	330711	205787	4.47769e+06	10010	1988	1989	1991	0	0	0	0	0	0	0	4.32942	0.486132	53.7026	10.0349	9.22099	0.143016	2.99646	12.9446	2.46762	7.13444	63.9237	37.5266	82.9367	6.69413	96.088	12.5505	1.90193	0.548681	0	19.531	0	27.6241	9.14897	7.82299	5.31106	17.1563	12.5682	7.28357	4.63607	0	6.16266	1.69462	0.0171463	4.29657
330711	1989	330711	205787	4.47769e+06	10010	1989	1989	1991	0	0	0	0	0	0	0	4.2486	0.522934	51.6771	10.7813	10.162	0.166852	3.01755	7.77254	2.35143	7.40699	64.8875	38.3042	87.9723	0.430972	97.2409	12.407	0.466008	0.502958	0	18.9845	0	27.1133	9.20756	7.72369	5.35107	18.1429	12.5411	7.24908	4.59441	0	5.7633	1.8468	0.0257194	4.37945
330711	1990	330711	205787	4.47769e+06	10010	1990	1989	1991	0	0	0	0	0	0	0	4.16779	0.559735	49.6516	11.5277	11.1029	0.150167	2.86648	9.97539	2.26499	8.78197	63.9277	38.041	86.0327	2.1066	97.0989	13.0343	0.463696	0.457234	0	18.438	0	26.6025	9.26614	7.62438	5.39108	19.1295	12.5139	7.21459	4.55275	0	5.36393	1.99897	0.0342926	4.46232
330711	1991	330711	205787	4.47769e+06	10010	1991	1989	1991	0	0	0	0	0	0	0	4.09137	0.530766	47.6905	15.2883	12.0617	0.133482	2.7154	12.1782	2.17855	10.1569	62.968	37.7779	84.0932	3.78223	96.957	13.6616	0.461384	0.411511	0	17.8914	0	26.0916	9.32472	7.52508	5.43109	20.1162	12.4868	7.1801	4.51108	0	4.96456	2.15114	0.0428657	4.54519
330711	1992	330711	205787	4.47769e+06	10010	1992	1989	1991	0	0	0	0	0	0	0	4.01494	0.501797	45.7294	19.049	13.0204	0.116796	2.56433	14.3811	2.09211	11.5319	62.0083	37.5147	82.1537	5.45785	96.815	14.2888	0.459072	0.365787	0	17.3449	0	25.5808	9.3833	7.42577	5.47109	21.1028	12.4596	7.14562	4.46942	0	4.5652	2.30332	0.0514389	4.62807
330711	1993	330711	205787	4.47769e+06	10010	1993	1989	1991	0	0	0	0	0	0	0	3.93852	0.472827	43.7683	22.8096	13.9792	0.100111	2.41326	16.5839	2.00567	12.9069	61.0486	37.2515	80.2142	7.13348	96.673	14.9161	0.45676	0.320064	0	16.7984	0	25.07	9.44189	7.32646	5.5111	22.0894	12.4325	7.11113	4.42776	0	4.16583	2.45549	0.060012	4.71094
330711	1994	330711	205787	4.47769e+06	10010	1994	1989	1991	0	0	0	0	0	0	0	3.8621	0.443858	41.8072	26.5703	14.9379	0.083426	2.26219	18.7868	1.91922	14.2819	60.0889	36.9884	78.2747	8.80911	96.5311	15.5434	0.454448	0.274341	0	16.2518	0	24.5592	9.50047	7.22716	5.55111	23.076	12.4053	7.07664	4.3861	0	3.76647	2.60766	0.0685851	4.79382
330711	1995	330711	205787	4.47769e+06	10010	1995	1989	1991	0	0	0	0	0	0	0	3.78568	0.414889	39.8461	30.3309	15.8967	0.0667408	2.11112	20.9896	1.83278	15.6568	59.1292	36.7252	76.3351	10.4847	96.3891	16.1706	0.452137	0.228617	0	15.7053	0	24.0484	9.55905	7.12785	5.59112	24.0627	12.3782	7.04215	4.34444	0	3.3671	2.75984	0.0771583	4.87669
330711	1996	330711	205787	4.47769e+06	10010	1996	1999	2001	0	0	0	0	0	0	0	3.70926	0.38592	37.885	34.0916	16.8554	0.0500556	1.96005	23.1925	1.74634	17.0318	58.1695	36.462	74.3956	12.1604	96.2472	16.7979	0.449825	0.182894	0	15.1587	0	23.5376	9.61764	7.02855	5.63113	25.0493	12.351	7.00766	4.30277	0	2.96774	2.91201	0.0857314	4.95956
330711	1997	330711	205787	4.47769e+06	10010	1997	1999	2001	0	0	0	0	0	0	0	3.63284	0.356951	35.9239	37.8522	17.8142	0.0333704	1.80898	25.3953	1.6599	18.4068	57.2098	36.1989	72.4561	13.836	96.1052	17.4252	0.447513	0.13717	0	14.6122	0	23.0267	9.67622	6.92924	5.67113	26.0359	12.3239	6.97318	4.26111	0	2.56837	3.06418	0.0943046	5.04244
330711	1998	330711	205787	4.47769e+06	10010	1998	1999	2001	0	0	0	0	0	0	0	3.55642	0.327981	33.9628	41.6129	18.7729	0.0166852	1.65791	27.5982	1.57346	19.7817	56.2501	35.9357	70.5166	15.5116	95.9632	18.0525	0.445201	0.0914469	0	14.0657	0	22.5159	9.7348	6.82994	5.71114	27.0225	12.2967	6.93869	4.21945	0	2.16901	3.21636	0.102878	5.12531
330711	1999	330711	205787	4.47769e+06	10010	1999	1999	2001	0	0	0	0	0	0	0	3.48	0.299012	32.0017	45.3735	19.7317	0	1.50683	29.801	1.48702	21.1567	55.2904	35.6726	68.577	17.1872	95.8213	18.6797	0.442889	0.0457234	0	13.5191	0	22.0051	9.79339	6.73063	5.75115	28.0092	12.2696	6.9042	4.17779	0	1.76964	3.36853	0.111451	5.20818
330711	2000	330711	205787	4.47769e+06	10010	2000	1999	2001	0	0	0	0	0	0	0	3.40358	0.270043	30.0406	49.1342	20.6904	0.507074	1.42303	30.8735	2.4377	23.6967	55.37	32.4632	66.0483	17.1872	95.8213	18.6495	0.442889	0	0	12.9726	0	21.4943	9.85197	6.63133	5.79116	28.9958	12.2424	6.86971	4.13612	0	1.37027	3.5207	0.120024	5.29106
330711	2001	330711	205787	4.47769e+06	10010	2001	1999	2001	0	0	0	0	0	0	0	3.40358	0.270043	30.0406	49.1342	20.6904	1.01415	1.33922	31.9459	3.38838	26.2368	55.4497	29.2538	63.5196	17.1872	95.8213	18.6193	0.442889	0	0	12.8009	0	21.4976	9.8503	6.13956	5.79449	28.8308	13.0659	6.87376	4.13734	0	1.14189	2.93392	0.10002	4.59778
330711	2002	330711	205787	4.47769e+06	10010	2002	1999	2001	0	0	0	0	0	0	0	3.40358	0.270043	30.0406	49.1342	20.6904	1.52122	1.25541	33.0184	4.33906	28.7768	55.5293	26.0444	60.9909	17.1872	95.8213	18.5891	0.442889	0	0	12.6292	0	21.501	9.84864	5.6478	5.79783	28.6657	13.8894	6.87782	4.13856	0	0.913516	2.34714	0.080016	3.90451
330711	2003	330711	205787	4.47769e+06	10010	2003	1999	2001	0	0	0	0	0	0	0	3.40358	0.270043	30.0406	49.1342	20.6904	2.0283	1.1716	34.0908	5.28975	31.3168	55.6089	22.835	58.4622	17.1872	95.8213	18.5589	0.442889	0	0	12.4575	0	21.5043	9.84697	5.15603	5.80116	28.5007	14.7129	6.88187	4.13978	0	0.685137	1.76035	0.060012	3.21123
330711	2004	330711	205787	4.47769e+06	10010	2004	1999	2001	0	0	0	0	0	0	0	3.40358	0.270043	30.0406	49.1342	20.6904	2.53537	1.08779	35.1633	6.24043	33.8568	55.6886	19.6256	55.9335	17.1872	95.8213	18.5287	0.442889	0	0	12.2858	0	21.5076	9.8453	4.66427	5.80449	28.3357	15.5364	6.88593	4.141	0	0.456758	1.17357	0.040008	2.51795
330711	2005	330711	205787	4.47769e+06	10010	2005	1999	2001	4	0	0	1	0	24.72	0	3.40358	0.270043	30.0406	49.1342	20.6904	3.04245	1.00398	36.2357	7.19111	36.3969	55.7682	16.4162	53.4048	17.1872	95.8213	18.4984	0.442889	0	0	12.1141	0	21.511	9.84364	4.1725	5.80783	28.1706	16.3599	6.88998	4.14222	0	0.228379	0.586784	0.020004	1.82468
330711	2006	330711	205787	4.47769e+06	10010	2006	2009	2001	0	4	0	0	0	0	24.72	3.40358	0.270043	30.0406	49.1342	20.6904	3.54952	0.920173	37.3081	8.1418	38.9369	55.8479	13.2068	50.8761	17.1872	95.8213	18.4682	0.442889	0	0	11.9424	0	21.5143	9.84197	3.68074	5.81116	28.0056	17.1834	6.89403	4.14344	0	0	0	0	1.1314
330711	2007	330711	205787	4.47769e+06	10010	2007	2009	2001	0	4	0	0	0	0	24.72	3.40358	0.270043	30.0406	49.1342	20.6904	4.0566	0.836364	38.3806	9.09248	41.4769	55.9275	9.99736	48.3474	17.1872	95.8213	18.438	0.442889	0	0	11.9424	0	21.5143	9.84197	3.68074	5.81116	28.0056	17.1834	6.89403	4.14344	0	0	0	0	1.1314
330711	2008	330711	205787	4.47769e+06	10010	2008	2009	2001	4	4	2	1	0	18.02	24.72	3.40358	0.270043	30.0406	49.1342	20.6904	5.07074	0.668747	40.5255	10.9938	46.5569	56.0868	3.57856	43.2899	17.1872	95.8213	18.3776	0.442889	0	0	11.9424	0	21.5143	9.84197	3.68074	5.81116	28.0056	17.1834	6.89403	4.14344	0	0	0	0	0.438124
330712	1979	330712	205109	4467709	10010.4	1979	1972	1981	1	11	1	0	0	3	397	7.52636	0.477111	69.2632	3.04629	4.28024	0.063	3.40182	20.9082	31.561	5.04367	45.9918	67.8526	47.589	61.8786	66.3207	2.80854	0.801307	0	0.030006	42.5285	4.36087	1.10522	0.065013	2.41548	0.025005	38.1926	11.2673	4.42017	0	0.22	34.8635	1.67517	0	4.68047
330712	1980	330712	205109	4467709	10010.4	1980	1982	1981	2	10	0	1	1	1325	257	7.24046	0.477111	69.2632	3.04629	4.28024	0.042	3.34763	23.6188	26.5289	5.1865	45.3771	66.3339	49.8425	61.8786	66.3207	2.80854	0.801307	0	0.0314349	39.1664	4.21656	1.06164	0.0743006	2.72769	0.0257194	41.2282	11.4594	4.31329	0	0.22	30.2773	1.46443	0	4.5476
330712	1981	330712	205109	4467709	10010.4	1981	1982	1981	7	11	1	3	1	678.2	1581	7.11005	0.518687	68.306	3.54693	4.42888	0.021	3.29343	26.3294	21.4969	5.32933	44.7624	64.8152	52.096	61.8786	66.3207	2.80854	0.801307	0	0.0328637	35.8043	4.07224	1.01806	0.0835881	3.03989	0.0264339	44.2639	11.6516	4.2064	0	0.22	25.6911	1.2537	0	4.41473
330712	1982	330712	205109	4467709	10010.4	1982	1982	1981	0	16	0	0	0	0	2256.1	6.97964	0.560264	67.3488	4.04756	4.57751	0	3.23923	29.04	16.4648	5.47216	44.1476	63.2965	54.3495	61.8786	66.3207	2.80854	0.801307	0	0.0342926	32.4422	3.92793	0.974481	0.0928757	3.3521	0.0271483	47.2995	11.8438	4.09951	0	0.22	21.105	1.04296	0	4.28186
330712	1983	330712	205109	4467709	10010.4	1983	1982	1981	4	13	3	0	0	6.4	2010.9	6.84923	0.60184	66.3916	4.5482	4.72615	0.01	3.29373	24.9342	15.1736	5.51427	44.8211	64.0841	59.635	53.2051	70.8296	2.68919	0.714782	0	0.0357214	29.0801	3.78361	0.9309	0.102163	3.6643	0.0278627	50.3351	12.036	3.99262	0	0.22	16.5188	0.832226	0	4.14899
330712	1984	330712	205109	4467709	10010.4	1984	1982	1981	2	14	0	1	0	34.2	2012.6	6.71882	0.643417	65.4344	5.04884	4.87479	0.0207312	3.34823	20.8284	13.8824	5.55638	45.4946	64.8718	64.9206	44.5315	75.3385	2.56983	0.628257	0	0.0371503	25.718	3.6393	0.88732	0.111451	3.97651	0.0285771	53.3707	12.2282	3.88573	0	0.22	11.9326	0.621491	0	4.01612
330712	1985	330712	205109	4467709	10010.4	1985	1982	1981	4	15	1	0	3	4206.5	2043.8	6.58841	0.684993	64.4772	5.54947	5.02343	0.0310968	3.40273	16.7225	12.5912	5.59848	46.1681	65.6594	70.2061	35.8579	79.8473	2.45048	0.541732	0	0.0385791	22.3559	3.49498	0.84374	0.120738	4.28871	0.0292916	56.4063	12.4203	3.77885	0	0.22	7.34645	0.410755	0	3.88325
330712	1986	330712	205109	4467709	10010.4	1986	1989	1991	4	17	1	1	1	339.2	4925.3	6.458	0.726569	63.52	6.05011	5.17207	0.0414624	3.45723	12.6167	11.3	5.64059	46.8415	66.4471	75.4917	27.1843	84.3562	2.33112	0.455206	0	0.040008	18.9938	3.35067	0.80016	0.130026	4.60092	0.030006	59.4419	12.6125	3.67196	0	0.22	2.76028	0.20002	0	3.75038
330712	1987	330712	205109	4467709	10010.4	1987	1989	1991	3	14	3	0	0	20	4586.3	6.32759	0.768146	62.5628	6.55074	5.3207	0.051828	3.51173	8.51087	10.0088	5.68269	47.515	67.2347	80.7772	18.5108	88.8651	2.21177	0.368681	0	0.0371503	18.3258	3.21064	0.743006	0.453662	4.27228	0.0485811	59.0318	13.8063	3.85013	0.0199901	0.218	2.86672	0.525767	0.020002	4.50616
330712	1988	330712	205109	4467709	10010.4	1988	1989	1991	2	17	0	0	0	0.5	4606.3	6.19718	0.809722	61.6056	7.05138	5.46934	0.0621936	3.56623	4.40504	8.71761	5.7248	48.1885	68.0224	86.0628	9.83718	93.374	2.09241	0.282156	0	0.0342926	17.6578	3.07061	0.685851	0.777298	3.94365	0.0671563	58.6217	15.0001	4.0283	0.0399801	0.248	2.97315	0.851514	0.040004	5.26195
330712	1989	330712	205109	4467709	10010.4	1989	1989	1991	4	15	1	1	1	850.5	4600.4	6.06677	0.851299	60.6484	7.55201	5.61798	0.0725592	3.62073	0.299211	7.42641	5.7669	48.862	68.81	91.3483	1.16361	97.8829	1.97305	0.195631	0	0.0314349	16.9898	2.93059	0.628697	1.10093	3.61501	0.0857314	58.2116	16.194	4.20646	0.0599702	0.247	3.07959	1.17726	0.060006	6.01774
330712	1990	330712	205109	4467709	10010.4	1990	1989	1991	2	17	0	0	0	0.3	5416.7	5.93636	0.892875	59.6912	8.05265	5.76662	0.0661777	3.49498	0.313385	6.92034	5.40679	48.6442	70.3752	91.9174	1.34219	97.8914	1.87701	0.199542	0	0.0285771	16.3218	2.79056	0.571543	1.42457	3.28637	0.104307	57.8016	17.3878	4.38463	0.0799602	0.245	3.18603	1.50301	0.080008	6.77353
330712	1991	330712	205109	4467709	10010.4	1991	1989	1991	6	15	2	0	0	6.5	1210.5	5.87672	0.836491	58.4491	10.7918	6.9039	0.0597962	3.36922	0.327558	6.41426	5.04667	48.4265	71.9403	92.4864	1.52077	97.9	1.78098	0.203453	0	0.0257194	15.6538	2.65053	0.514389	1.74821	2.95773	0.122882	57.3915	18.5816	4.5628	0.0999503	0.244	3.29247	1.82875	0.10001	7.52932
330712	1992	330712	205109	4467709	10010.4	1992	1989	1991	7	17	2	2	1	381.6	877.8	5.81708	0.780108	57.207	13.531	8.04118	0.0534148	3.24347	0.341732	5.90819	4.68656	48.2087	73.5054	93.0555	1.69935	97.9085	1.68494	0.207363	0	0.0228617	14.9859	2.5105	0.457234	2.07184	2.6291	0.141457	56.9814	19.7754	4.74097	0.11994	0.243	3.39891	2.1545	0.120012	8.28511
330712	1993	330712	205109	4467709	10010.4	1993	1989	1991	1	21	0	0	0	1	1239.4	5.75744	0.723724	55.9649	16.2702	9.17846	0.0470333	3.11771	0.355906	5.40211	4.32644	47.991	75.0706	93.6246	1.87793	97.917	1.5889	0.211274	0	0.020004	14.3179	2.37047	0.40008	2.39548	2.30046	0.160032	56.5713	20.9692	4.91914	0.13993	0.241	3.50535	2.48025	0.140014	9.0409
330712	1994	330712	205109	4467709	10010.4	1994	1989	1991	1	20	0	0	0	0	1239.9	5.6978	0.667341	54.7228	19.0094	10.3157	0.0406518	2.99196	0.370079	4.89604	3.96633	47.7732	76.6357	94.1936	2.05651	97.9255	1.49286	0.215185	0	0.0171463	13.6499	2.23045	0.342926	2.71912	1.97182	0.178607	56.1612	22.163	5.0973	0.15992	0.24	3.61179	2.80599	0.160016	9.79669
330712	1995	330712	205109	4467709	10010.4	1995	1989	1991	4	17	1	0	1	113.3	389.4	5.63816	0.610957	53.4807	21.7486	11.453	0.0342703	2.8662	0.384253	4.38997	3.60621	47.5555	78.2009	94.7627	2.23509	97.9341	1.39682	0.219096	0	0.0142886	12.9819	2.09042	0.285771	3.04275	1.64319	0.197182	55.7512	23.3568	5.27547	0.179911	0.238	3.71823	3.13174	0.180018	10.5525
330712	1996	330712	205109	4467709	10010.4	1996	1999	2001	2	19	1	0	0	4	502.4	5.57852	0.554573	52.2386	24.4877	12.5903	0.0278889	2.74045	0.398427	3.88389	3.2461	47.3377	79.766	95.3317	2.41367	97.9426	1.30078	0.223007	0	0.0114309	12.3139	1.95039	0.228617	3.36639	1.31455	0.215757	55.3411	24.5506	5.45364	0.199901	0.237	3.82467	3.45749	0.20002	11.3083
330712	1997	330712	205109	4467709	10010.4	1997	1999	2001	8	15	3	2	0	51	499.9	5.51888	0.49819	50.9966	27.2269	13.7276	0.0215074	2.61469	0.4126	3.37782	2.88598	47.1199	81.3312	95.9008	2.59225	97.9511	1.20474	0.226917	0	0.00857314	11.6459	1.81036	0.171463	3.69002	0.985911	0.234333	54.931	25.7444	5.63181	0.219891	0.235	3.93111	3.78324	0.220022	12.0641
330712	1998	330712	205109	4467709	10010.4	1998	1999	2001	5	16	1	2	2	1047	169.3	5.45924	0.441806	49.7545	29.9661	14.8649	0.0151259	2.48894	0.426774	2.87174	2.52587	46.9022	82.8963	96.4699	2.77083	97.9596	1.1087	0.230828	0	0.00571543	10.9779	1.67033	0.114309	4.01366	0.657274	0.252908	54.5209	26.9382	5.80998	0.239881	0.234	4.03755	4.10898	0.240024	12.8199
330712	1999	330712	205109	4467709	10010.4	1999	1999	2001	6	20	2	0	1	825.55	1215.3	5.3996	0.385423	48.5124	32.7053	16.0022	0.00874445	2.36318	0.440948	2.36567	2.16575	46.6844	84.4614	97.0389	2.94941	97.9682	1.01266	0.234739	0	0.00285771	10.3099	1.53031	0.0571543	4.3373	0.328637	0.271483	54.1108	28.1321	5.98814	0.259871	0.233	4.14399	4.43473	0.260026	13.5756
330712	2000	330712	205109	4467709	10010.4	2000	1999	2001	2	25	0	0	0	1.13	2040.85	5.33995	0.329039	47.2703	35.4445	17.1394	0.612944	2.18934	2.36608	2.9775	4.80109	47.2869	76.3062	93.899	2.94941	97.9682	1.15602	0.234739	0	0	9.64193	1.39028	0	4.66093	0	0.290058	53.7007	29.3259	6.16631	0.279861	0.25	4.25042	4.76048	0.280028	14.3314
330712	2001	330712	205109	4467709	10010.4	2001	1999	2001	4	23	3	0	0	18.03	1928.68	5.33995	0.329039	47.2703	35.4445	17.1394	1.21714	2.0155	4.29121	3.58934	7.43644	47.8893	68.1509	90.759	2.94941	97.9682	1.29938	0.234739	0	0	9.79196	1.39028	0	4.59092	0	0.468427	53.3723	29.3959	6.09638	0.458008	0.25	3.66373	3.97707	0.233357	12.2699
330712	2002	330712	205109	4467709	10010.4	2002	1999	2001	0	25	0	0	0	0	1942.71	5.33995	0.329039	47.2703	35.4445	17.1394	1.82134	1.84166	6.21634	4.20117	10.0718	48.4918	59.9957	87.6191	2.94941	97.9682	1.44273	0.234739	0	0	9.94199	1.39028	0	4.5209	0	0.646796	53.0439	29.4659	6.02646	0.636156	0.25	3.07703	3.19366	0.186685	10.2084
330712	2003	330712	205109	4467709	10010.4	2003	1999	2001	4	17	0	1	0	29.9	1891.71	5.33995	0.329039	47.2703	35.4445	17.1394	2.42554	1.66781	8.14147	4.813	12.7071	49.0942	51.8405	84.4792	2.94941	97.9682	1.58609	0.234739	0	0	10.092	1.39028	0	4.45089	0	0.825165	52.7155	29.5359	5.95653	0.814303	0.25	2.49033	2.41025	0.140014	8.14689
330712	2004	330712	205109	4467709	10010.4	2004	1999	2001	2	16	0	0	0	0.56	874.61	5.33995	0.329039	47.2703	35.4445	17.1394	3.02974	1.49397	10.0666	5.42483	15.3425	49.6967	43.6852	81.3392	2.94941	97.9682	1.72945	0.234739	0	0	10.242	1.39028	0	4.38088	0	1.00353	52.3871	29.6059	5.8866	0.99245	0.25	1.90363	1.62684	0.0933427	6.08537
330712	2005	330712	205109	4467709	10010.4	2005	1999	2001	4	12	0	0	0	2.55	49.62	5.33995	0.329039	47.2703	35.4445	17.1394	3.63394	1.32013	11.9917	6.03666	17.9778	50.2991	35.53	78.1993	2.94941	97.9682	1.8728	0.234739	0	0	10.3921	1.39028	0	4.31086	0	1.1819	52.0587	29.6759	5.81668	1.1706	0.25	1.31693	0.843428	0.0466713	4.02386
330712	2006	330712	205109	4467709	10010.4	2006	2009	2001	5	14	0	0	0	1.47	51.04	5.33995	0.329039	47.2703	35.4445	17.1394	4.23814	1.14629	13.9169	6.6485	20.6132	50.9015	27.3747	75.0593	2.94941	97.9682	2.01616	0.234739	0	0	10.5421	1.39028	0	4.24085	0	1.36027	51.7303	29.7459	5.74675	1.34875	0.25	0.730231	0.060019	0	1.96234
330712	2007	330712	205109	4467709	10010.4	2007	2009	2001	2	15	0	0	0	0.38	34.48	5.33995	0.329039	47.2703	35.4445	17.1394	4.84234	0.972448	15.842	7.26033	23.2485	51.504	19.2195	71.9194	2.94941	97.9682	2.15952	0.234739	0	0	10.5421	1.39028	0	4.24085	0	1.36027	51.7303	29.7459	5.74675	1.34875	0.25	0.730231	0.060019	0	1.96234
330712	2008	330712	205109	4467709	10010.4	2008	2009	2001	2	17	0	0	0	0.04	34.86	5.33995	0.329039	47.2703	35.4445	17.1394	6.05074	0.624765	19.6923	8.48399	28.5192	52.7089	2.90898	65.6395	2.94941	97.9682	2.44623	0.234739	0	0	10.5421	1.39028	0	4.24085	0	1.36027	51.7303	29.7459	5.74675	1.34875	0.25	0.143532	0	0	0
330713	1979	330713	204432	4457727	10009.4	1979	1972	1981	1	0	0	1	0	20	0	8.65308	0.493549	48.9691	6.52267	9.90208	1.385	4.71187	22.4853	13.9611	5.57106	44.7062	51.0785	61.6832	48.1286	61.4244	11.1679	8.07929	12.7389	0.165115	6.91484	26.9939	3.23226	13.1892	0.365256	1.53107	28.2198	6.64966	20.525	8.3576	0.203	11.1967	19.2866	0.095057	0.60036
330713	1980	330713	204432	4457727	10009.4	1980	1982	1981	9	1	4	2	1	222.1	20	8.36128	0.493549	48.9691	6.52267	9.90208	0.923	4.69156	24.9827	12.167	5.43123	44.8883	51.3104	61.5544	48.1286	61.4244	11.1679	8.07929	12.5888	0.187274	6.26439	27.4249	3.29373	12.1585	0.417435	1.48961	29.7465	6.42879	20.8443	8.59684	0.206	10.0446	18.3653	0.108637	0.686126
330713	1981	330713	204432	4457727	10009.4	1981	1982	1981	4	10	1	2	1	281	242.1	8.23109	0.61216	50.8945	6.3967	9.84379	0.462	4.67124	27.4801	10.3729	5.29139	45.0704	51.5423	61.4256	48.1286	61.4244	11.1679	8.07929	12.4387	0.209432	5.61393	27.8559	3.35521	11.1278	0.469614	1.44816	31.2733	6.20792	21.1636	8.83607	0.209	8.89248	17.444	0.122216	0.771891
330713	1982	330713	204432	4457727	10009.4	1982	1982	1981	2	14	1	1	0	27	523.1	8.10089	0.730771	52.8198	6.27073	9.78549	0	4.65093	29.9775	8.57883	5.15156	45.2525	51.7742	61.2968	48.1286	61.4244	11.1679	8.07929	12.2886	0.231591	4.96347	28.2869	3.41668	10.0971	0.521794	1.4067	32.8001	5.98705	21.4829	9.0753	0.212	7.74036	16.5228	0.135796	0.857657
330713	1983	330713	204432	4457727	10009.4	1983	1982	1981	2	16	2	0	0	6	550.1	7.9707	0.849382	54.7451	6.14476	9.7272	0	4.74396	25.9655	7.41122	5.12115	45.2537	52.8052	66.3668	41.8288	66.1405	11.0704	7.06183	12.1385	0.253749	4.31302	28.718	3.47815	9.06635	0.573973	1.36524	34.3269	5.76618	21.8022	9.31453	0.215	6.58824	15.6015	0.149375	0.943423
330713	1984	330713	204432	4457727	10009.4	1984	1982	1981	4	18	0	0	1	610.8	556.1	7.84051	0.967993	56.6705	6.01879	9.66891	0.000862463	4.837	21.9534	6.2436	5.09074	45.2548	53.8361	71.4368	35.529	70.8566	10.9729	6.04437	11.9884	0.275907	3.66256	29.149	3.53962	8.03562	0.626152	1.32378	35.8537	5.54531	22.1215	9.55376	0.218	5.43612	14.6802	0.162955	1.02919
330713	1985	330713	204432	4457727	10009.4	1985	1982	1981	10	21	5	2	0	59	1146.9	7.71031	1.0866	58.5958	5.89281	9.61061	0.0012937	4.93003	17.9414	5.07599	5.06033	45.2559	54.8671	76.5068	29.2292	75.5728	10.8754	5.02691	11.8383	0.298066	3.01211	29.58	3.60109	7.0049	0.678332	1.28233	37.3805	5.32444	22.4408	9.793	0.221	4.284	13.759	0.176534	1.11495
330713	1986	330713	204432	4457727	10009.4	1986	1989	1991	10	22	6	3	0	135.3	983.8	7.58012	1.20521	60.5212	5.76684	9.55232	0.00172493	5.02306	13.9293	3.90837	5.02992	45.257	55.898	81.5767	22.9294	80.2889	10.7779	4.00945	11.6882	0.320224	2.36165	30.011	3.66256	5.97418	0.730511	1.24087	38.9072	5.10357	22.7601	10.0322	0.23	3.13188	12.8377	0.190114	1.20072
330713	1987	330713	204432	4457727	10009.4	1987	1989	1991	5	28	1	0	0	8.1	838.1	7.44993	1.32383	62.4465	5.64087	9.49403	0.00215616	5.1161	9.91726	2.74075	4.9995	45.2581	56.929	86.6467	16.6296	85.005	10.6804	2.99199	11.2443	0.297351	2.44886	29.758	3.81124	5.86053	0.678332	1.53536	39.0709	4.99278	22.8971	9.95794	0.228	3.11901	12.5139	0.177964	1.16999
330713	1988	330713	204432	4457727	10009.4	1988	1989	1991	4	31	1	0	0	10.5	819.2	7.31973	1.44244	64.3718	5.5149	9.43574	0.00258739	5.20913	5.9052	1.57314	4.96909	45.2592	57.9599	91.7167	10.3298	89.7212	10.5829	1.97453	10.8004	0.274478	2.53606	29.5049	3.95992	5.74688	0.626152	1.82985	39.2346	4.88199	23.034	9.88366	0.218	3.10615	12.1902	0.165814	1.13925
330713	1989	330713	204432	4457727	10009.4	1989	1989	1991	12	33	2	1	1	624.2	823.7	7.18954	1.56105	66.2972	5.38893	9.37744	0.00301862	5.30216	1.89315	0.405523	4.93868	45.2603	58.9908	96.7866	4.03005	94.4373	10.4854	0.957071	10.3565	0.251605	2.62326	29.2519	4.10859	5.63323	0.573973	2.12434	39.3983	4.7712	23.171	9.80938	0.217	3.09328	11.8664	0.153664	1.10852
330713	1990	330713	204432	4457727	10009.4	1990	1989	1991	12	41	4	2	0	101.2	837.1	7.05935	1.67966	68.2225	5.26296	9.31915	0.008581	5.27414	1.89403	0.606789	4.91756	46.0642	59.0006	96.6554	4.07661	94.7489	10.6782	1.02157	9.91265	0.228731	2.71047	28.9989	4.25727	5.51958	0.521794	2.41884	39.562	4.66041	23.308	9.73509	0.216	3.08042	11.5426	0.141513	1.07779
330713	1991	330713	204432	4457727	10009.4	1991	1989	1991	6	43	2	0	1	7125.1	879.3	6.98255	1.55784	64.1411	9.922	10.4463	0.0141434	5.24611	1.89491	0.808056	4.89644	46.868	59.0103	96.5242	4.12317	95.0605	10.8709	1.08608	9.46877	0.205858	2.79767	28.7458	4.40594	5.40593	0.469614	2.71333	39.7257	4.54961	23.445	9.66081	0.214	3.06755	11.2189	0.129363	1.04706
330713	1992	330713	204432	4457727	10009.4	1992	1989	1991	2	39	1	0	0	2.7	7869.1	6.90576	1.43601	60.0597	14.581	11.5735	0.0197057	5.21808	1.89579	1.00932	4.87532	47.6719	59.02	96.393	4.16973	95.3721	11.0637	1.15058	9.02489	0.182985	2.88488	28.4928	4.55462	5.29228	0.417435	3.00782	39.8894	4.43882	23.5819	9.58653	0.213	3.05469	10.8951	0.117213	1.01632
330713	1993	330713	204432	4457727	10009.4	1993	1989	1991	3	36	1	0	0	2.5	7863.7	6.82896	1.31419	55.9784	19.2401	12.7007	0.0252681	5.19005	1.89667	1.21059	4.8542	48.4758	59.0298	96.2617	4.21628	95.6836	11.2564	1.21508	8.58101	0.160112	2.97208	28.2398	4.70329	5.17863	0.365256	3.30231	40.053	4.32803	23.7189	9.51224	0.211	3.04182	10.5713	0.105063	0.985591
330713	1994	330713	204432	4457727	10009.4	1994	1989	1991	4	35	0	1	0	25.5	7855.7	6.75217	1.19237	51.897	23.8991	13.8279	0.0308305	5.16203	1.89755	1.41186	4.83308	49.2796	59.0395	96.1305	4.26284	95.9952	11.4492	1.27959	8.13712	0.137239	3.05928	27.9867	4.85197	5.06497	0.313076	3.5968	40.2167	4.21724	23.8559	9.43796	0.21	3.02896	10.2476	0.0929129	0.954858
330713	1995	330713	204432	4457727	10009.4	1995	1989	1991	20	27	7	1	0	41	7257	6.67538	1.07054	47.8156	28.5582	14.9551	0.0363929	5.134	1.89843	1.61312	4.81196	50.0835	59.0492	95.9993	4.3094	96.3068	11.6419	1.34409	7.69324	0.114366	3.14649	27.7337	5.00064	4.95132	0.260897	3.8913	40.3804	4.10645	23.9929	9.36368	0.208	3.0161	9.92381	0.0807627	0.924126
330713	1996	330713	204432	4457727	10009.4	1996	1999	2001	11	35	4	0	0	7.5	7196.8	6.59858	0.94872	43.7342	33.2172	16.0823	0.0419552	5.10597	1.89931	1.81439	4.79084	50.8873	59.0589	95.8681	4.35595	96.6184	11.8346	1.40859	7.24936	0.0914926	3.23369	27.4807	5.14932	4.83767	0.208717	4.18579	40.5441	3.99565	24.1299	9.28939	0.207	3.00323	9.60005	0.0686126	0.893393
330713	1997	330713	204432	4457727	10009.4	1997	1999	2001	4	40	1	0	0	5.1	79.2	6.52179	0.826897	39.6529	37.8763	17.2095	0.0475176	5.07794	1.90019	2.01566	4.76971	51.6912	59.0687	95.7369	4.40251	96.93	12.0274	1.4731	6.80548	0.0686194	3.3209	27.2276	5.29799	4.72402	0.156538	4.48028	40.7078	3.88486	24.2668	9.21511	0.206	2.99037	9.27628	0.0564624	0.86266
330713	1998	330713	204432	4457727	10009.4	1998	1999	2001	27	42	3	0	0	13.77	81.6	6.44499	0.705074	35.5715	42.5353	18.3367	0.05308	5.04991	1.90107	2.21692	4.74859	52.495	59.0784	95.6056	4.44907	97.2416	12.2201	1.5376	6.3616	0.0457463	3.4081	26.9746	5.44667	4.61037	0.104359	4.77477	40.8715	3.77407	24.4038	9.14083	0.204	2.9775	8.95251	0.0443123	0.831927
330713	1999	330713	204432	4457727	10009.4	1999	1999	2001	17	66	7	0	0	23.8	92.87	6.3682	0.583251	31.4901	47.1943	19.4639	0.0586424	5.02189	1.90195	2.41819	4.72747	53.2989	59.0881	95.4744	4.49562	97.5532	12.4129	1.6021	5.91771	0.0228731	3.4953	26.7216	5.59535	4.49672	0.0521794	5.06926	41.0352	3.66328	24.5408	9.06655	0.203	2.96464	8.62875	0.0321621	0.801195
330713	2000	330713	204432	4457727	10009.4	2000	1999	2001	20	79	3	1	0	22.41	91.17	6.2914	0.461428	27.4088	51.8534	20.5911	0.520633	4.84305	2.40162	2.49079	5.23126	54.2627	53.2592	94.4405	4.49562	97.5532	13.3167	1.6021	5.47383	0	3.58251	26.4685	5.74402	4.38307	0	5.36376	41.1988	3.55249	24.6778	8.99226	0.22	2.95177	8.30498	0.020012	0.770462
330713	2001	330713	204432	4457727	10009.4	2001	1999	2001	1	79	0	0	0	0.05	72.58	6.2914	0.461428	27.4088	51.8534	20.5911	0.982624	4.66421	2.90129	2.5634	5.73504	55.2266	47.4302	93.4066	4.49562	97.5532	14.2205	1.6021	5.72901	0.0466993	3.50412	26.7137	5.50552	4.62991	0	5.03519	40.5601	3.72928	25.1188	8.94165	0.22	2.46452	8.19327	0.0633632	0.850474
330713	2002	330713	204432	4457727	10009.4	2002	1999	2001	6	69	1	0	1	2054.47	65.13	6.2914	0.461428	27.4088	51.8534	20.5911	1.44462	4.48537	3.40096	2.636	6.23882	56.1904	41.6012	92.3727	4.49562	97.5532	15.1243	1.6021	5.98419	0.0933987	3.42573	26.9589	5.26702	4.87675	0	4.70663	39.9213	3.90607	25.5599	8.89103	0.22	1.97727	8.08155	0.106714	0.930485
330713	2003	330713	204432	4457727	10009.4	2003	1999	2001	7	71	3	0	0	9.84	2114.5	6.2914	0.461428	27.4088	51.8534	20.5911	1.90661	4.30653	3.90062	2.7086	6.7426	57.1542	35.7722	91.3387	4.49562	97.5532	16.0281	1.6021	6.23937	0.140098	3.34734	27.204	5.02852	5.12359	0	4.37807	39.2825	4.08286	26.001	8.84041	0.22	1.49002	7.96983	0.150066	1.0105
330713	2004	330713	204432	4457727	10009.4	2004	1999	2001	5	51	2	0	0	4.33	2110.57	6.2914	0.461428	27.4088	51.8534	20.5911	2.3686	4.12769	4.40029	2.78121	7.24639	58.1181	29.9432	90.3048	4.49562	97.5532	16.9319	1.6021	6.49455	0.186797	3.26896	27.4492	4.79002	5.37043	0	4.0495	38.6437	4.25965	26.4421	8.7898	0.22	1.00276	7.85812	0.193417	1.09051
330713	2005	330713	204432	4457727	10009.4	2005	1999	2001	8	39	3	0	0	12.26	2091.1	6.2914	0.461428	27.4088	51.8534	20.5911	2.83059	3.94885	4.89996	2.85381	7.75017	59.0819	24.1143	89.2709	4.49562	97.5532	17.8357	1.6021	6.74972	0.233497	3.19057	27.6944	4.55152	5.61727	0	3.72094	38.0049	4.43644	26.8832	8.73918	0.22	0.515512	7.7464	0.236768	1.17052
330713	2006	330713	204432	4457727	10009.4	2006	2009	2001	5	27	1	1	0	23.26	2080.95	6.2914	0.461428	27.4088	51.8534	20.5911	3.29258	3.77001	5.39963	2.92641	8.25395	60.0457	18.2853	88.237	4.49562	97.5532	18.7395	1.6021	7.0049	0.280196	3.11218	27.9396	4.31302	5.86411	0	3.39237	37.3662	4.61323	27.3243	8.68857	0.28	0.0282601	7.63468	0.280119	1.25053
330713	2007	330713	204432	4457727	10009.4	2007	2009	2001	6	31	0	0	0	3.29	2104.16	6.2914	0.461428	27.4088	51.8534	20.5911	3.75457	3.59117	5.8993	2.99901	8.75773	61.0096	12.4563	87.2031	4.49562	97.5532	19.6433	1.6021	7.0049	0.280196	3.11218	27.9396	4.31302	5.86411	0	3.39237	37.3662	4.61323	27.3243	8.68857	0.28	0.0282601	7.63468	0.280119	1.25053
330713	2008	330713	204432	4457727	10009.4	2008	2009	2001	6	31	1	0	0	2.62	52.98	6.2914	0.461428	27.4088	51.8534	20.5911	4.67855	3.23349	6.89863	3.14422	9.7653	62.9372	0.798372	85.1352	4.49562	97.5532	21.4509	1.6021	7.0049	0.280196	3.11218	27.9396	4.31302	5.86411	0	3.39237	37.3662	4.61323	27.3243	8.68857	0.28	0	7.52297	0.32347	1.33054
330714	1979	330714	203756	4447745	10010.4	1979	1972	1981	2	3	0	2	0	40	30.5	8.9925	0.476806	65.463	10.2217	7.22806	0.869	3.25719	39.5517	6.00157	13.0572	45.5337	22.2607	53.101	72.9332	76.4015	15.3183	16.58	12.8287	0.424957	0	12.2488	3.36966	48.4652	0	9.59904	12.3638	0.489951	20.1649	8.59654	0	0.24995	23.8602	0.409918	0.19996
330714	1980	330714	203756	4447745	10010.4	1980	1982	1981	2	5	1	0	1	305	70.5	8.8401	0.476806	65.463	10.2217	7.22806	0.747	3.16868	40.6215	6.60276	13.4554	46.1096	22.067	51.6617	72.9332	76.4015	15.3183	16.58	13.323	0.404245	0	12.3259	3.58964	47.561	0	9.47048	12.5287	0.559944	20.4755	9.11314	0	0.285657	21.5571	0.384209	0.228526
330714	1981	330714	203756	4447745	10010.4	1981	1982	1981	1	7	0	0	0	1	375.5	8.69201	0.57983	65.3062	9.80588	7.69518	0.625	3.08017	41.6913	7.20396	13.8536	46.6855	21.8734	50.2223	72.9332	76.4015	15.3183	16.58	13.8172	0.383533	0	12.403	3.80962	46.6568	0	9.34192	12.6937	0.629937	20.7861	9.62974	0	0.321364	19.254	0.3585	0.257091
330714	1982	330714	203756	4447745	10010.4	1982	1982	1981	0	8	0	0	0	0	376.5	8.54392	0.682854	65.1494	9.39003	8.16229	0.503	2.99166	42.7611	7.80516	14.2518	47.2614	21.6798	48.783	72.9332	76.4015	15.3183	16.58	14.3114	0.362821	0	12.4802	4.0296	45.7526	0	9.21336	12.8587	0.69993	21.0967	10.1463	0	0.357071	16.9509	0.332791	0.285657
330714	1983	330714	203756	4447745	10010.4	1983	1982	1981	0	7	0	0	0	0	374	8.39582	0.785879	64.9925	8.97417	8.6294	0.437	2.99619	38.3101	7.09954	13.9477	48.717	23.3947	53.8429	63.2077	79.46	15.2984	14.2926	14.8057	0.342109	0	12.5573	4.24958	44.8484	0	9.08481	13.0237	0.769923	21.4073	10.6629	0	0.392779	14.6478	0.307081	0.314223
330714	1984	330714	203756	4447745	10010.4	1984	1982	1981	1	5	1	0	0	2	346	8.24773	0.888903	64.8357	8.55831	9.09651	0.371063	3.00072	33.859	6.39393	13.6436	50.1725	25.1096	58.9029	53.4821	82.5184	15.2784	12.0053	15.2999	0.321396	0	12.6345	4.46955	43.9442	0	8.95625	13.1887	0.839916	21.7179	11.1795	0	0.428486	12.3447	0.281372	0.342789
330714	1985	330714	203756	4447745	10010.4	1985	1982	1981	0	4	0	0	0	0	308	8.09964	0.991927	64.6789	8.14246	9.56362	0.305117	3.00524	29.408	5.68831	13.3395	51.6281	26.8245	63.9629	43.7566	85.5769	15.2585	9.71792	15.7941	0.300684	0	12.7116	4.68953	43.04	0	8.82769	13.3537	0.909909	22.0285	11.6961	0	0.464193	10.0416	0.255663	0.371354
330714	1986	330714	203756	4447745	10010.4	1986	1989	1991	4	2	2	2	0	82	3	7.95155	1.09495	64.5221	7.7266	10.0307	0.23917	3.00977	24.9569	4.98269	13.0354	53.0836	28.5393	69.0229	34.0311	88.6353	15.2386	7.43057	16.2884	0.279972	0	12.7887	4.90951	42.1358	0	8.69913	13.5186	0.979902	22.3391	12.2127	0	0.4999	7.73845	0.229954	0.39992
330714	1987	330714	203756	4447745	10010.4	1987	1989	1991	2	5	1	1	0	18	84	7.80345	1.19798	64.3652	7.31074	10.4978	0.173224	3.0143	20.5059	4.27708	12.7313	54.5392	30.2542	74.0829	24.3055	91.6937	15.2187	5.14321	16.0048	0.261402	0	12.718	4.84166	39.501	0	11.6667	13.3051	0.909909	21.2063	12.7489	0	0.464193	7.68846	0.22924	0.371354
330714	1988	330714	203756	4447745	10010.4	1988	1989	1991	4	7	1	1	1	756.7	102	7.65536	1.301	64.2084	6.89489	10.965	0.107278	3.01883	16.0548	3.57146	12.4273	55.9948	31.9691	79.1428	14.58	94.7522	15.1987	2.85585	15.7213	0.242833	0	12.6473	4.77381	36.8663	0	14.6343	13.0915	0.839916	20.0734	13.2851	0	0.428486	7.63847	0.228526	0.342789
330714	1989	330714	203756	4447745	10010.4	1989	1989	1991	2	11	2	0	0	18	858.7	7.50727	1.40402	64.0516	6.47903	11.4321	0.0413311	3.02335	11.6038	2.86585	12.1232	57.4503	33.6839	84.2028	4.85447	97.8106	15.1788	0.568496	15.4377	0.224263	0	12.5766	4.70596	34.2316	0	17.6018	12.878	0.769923	18.9405	13.8213	0	0.392779	7.58848	0.227812	0.314223
330714	1990	330714	203756	4447745	10010.4	1990	1989	1991	4	12	2	2	0	87.7	874.7	7.35918	1.50705	63.8947	6.06317	11.8992	0.0655015	3.08754	11.0967	2.91813	12.0425	57.4705	35.0619	84.7476	5.28944	97.6277	16.8876	0.656051	15.1542	0.205694	0	12.5059	4.63811	31.5968	0	20.5694	12.6644	0.69993	17.8076	14.3575	0	0.357071	7.53849	0.227097	0.285657
330714	1991	330714	203756	4447745	10010.4	1991	1989	1991	10	16	4	2	1	1035.5	962.4	7.24492	1.38642	60.1733	9.95028	13.5331	0.089672	3.15172	10.5896	2.97041	11.9619	57.4906	36.4399	85.2923	5.72441	97.4448	18.5963	0.743607	14.8707	0.187124	0	12.4352	4.57026	28.9621	0	23.5369	12.4509	0.629937	16.6747	14.8936	0	0.321364	7.4885	0.226383	0.257091
330714	1992	330714	203756	4447745	10010.4	1992	1989	1991	7	22	3	1	0	24	1915.9	7.13067	1.26578	56.4518	13.8374	15.1669	0.113842	3.2159	10.0825	3.02269	11.8813	57.5108	37.8179	85.8371	6.15938	97.2619	20.3051	0.831162	14.5871	0.168555	0	12.3645	4.50241	26.3274	0	26.5045	12.2373	0.559944	15.5419	15.4298	0	0.285657	7.43851	0.225669	0.228526
330714	1993	330714	203756	4447745	10010.4	1993	1989	1991	7	27	3	0	0	9.6	1921.9	7.01641	1.14515	52.7303	17.7245	16.8008	0.138013	3.28008	9.57537	3.07497	11.8006	57.5309	39.196	86.3818	6.59435	97.079	22.0138	0.918717	14.3036	0.149985	0	12.2938	4.43456	23.6926	0	29.4721	12.0238	0.489951	14.409	15.966	0	0.24995	7.38852	0.224955	0.19996
330714	1994	330714	203756	4447745	10010.4	1994	1989	1991	15	30	5	0	0	21.2	1174.8	6.90216	1.02452	49.0088	21.6116	18.4347	0.162183	3.34426	9.06827	3.12725	11.72	57.5511	40.574	86.9266	7.02932	96.8961	23.7226	1.00627	14.02	0.131415	0	12.2231	4.36671	21.0579	0	32.4396	11.8102	0.419958	13.2761	16.5022	0	0.214243	7.33853	0.224241	0.171394
330714	1995	330714	203756	4447745	10010.4	1995	1989	1991	8	43	5	0	0	17.4	1178	6.78791	0.903883	45.2873	25.4987	20.0686	0.186354	3.40844	8.56117	3.17953	11.6394	57.5712	41.952	87.4713	7.46429	96.7132	25.4313	1.09383	13.7365	0.112846	0	12.1524	4.29886	18.4232	0	35.4072	11.5967	0.349965	12.1432	17.0384	0	0.178536	7.28854	0.223527	0.142829
330714	1996	330714	203756	4447745	10010.4	1996	1999	2001	5	47	1	1	0	35.2	1107.7	6.67365	0.783251	41.5659	29.3858	21.7025	0.210524	3.47262	8.05407	3.23181	11.5587	57.5914	43.33	88.0161	7.89926	96.5303	27.1401	1.18138	13.4529	0.0942763	0	12.0816	4.23101	15.7884	0	38.3747	11.3831	0.279972	11.0103	17.5745	0	0.142829	7.23855	0.222813	0.114263
330714	1997	330714	203756	4447745	10010.4	1997	1999	2001	1	42	1	0	0	4	107.4	6.5594	0.662618	37.8444	33.273	23.3363	0.234695	3.5368	7.54697	3.28409	11.4781	57.6115	44.708	88.5608	8.33422	96.3474	28.8488	1.26894	13.1694	0.0757067	0	12.0109	4.16316	13.1537	0	41.3423	11.1696	0.209979	9.87746	18.1107	0	0.107121	7.18856	0.222098	0.0856971
330714	1998	330714	203756	4447745	10010.4	1998	1999	2001	5	36	1	0	0	6.5	87.4	6.44515	0.541985	34.1229	37.1601	24.9702	0.258865	3.60099	7.03987	3.33637	11.3975	57.6317	46.086	89.1055	8.76919	96.1645	30.5576	1.35649	12.8859	0.0571371	0	11.9402	4.0953	10.5189	0	44.3099	10.956	0.139986	8.74458	18.6469	0	0.0714143	7.13857	0.221384	0.0571314
330714	1999	330714	203756	4447745	10010.4	1999	1999	2001	4	34	3	0	0	9	84.3	6.33089	0.421352	30.4014	41.0472	26.6041	0.283036	3.66517	6.53278	3.38865	11.3168	57.6518	47.464	89.6503	9.20416	95.9816	32.2663	1.44405	12.6023	0.0385676	0	11.8695	4.02745	7.88421	0	47.2774	10.7425	0.069993	7.6117	19.1831	0	0.0357071	7.08858	0.22067	0.0285657
330714	2000	330714	203756	4447745	10010.4	2000	1999	2001	1	23	1	0	0	4	72.1	6.21664	0.300719	26.6799	44.9343	28.238	0.814603	3.53902	7.68897	3.6261	12.1249	58.1004	42.8624	87.7251	9.20416	95.9816	35.0809	1.44405	12.3188	0.019998	0	11.7988	3.9596	5.24948	0	50.245	10.5289	0	6.47882	19.7192	0	0	7.03859	0.219956	0
330714	2001	330714	203756	4447745	10010.4	2001	1999	2001	2	16	0	0	0	0.12	58.7	6.21664	0.300719	26.6799	44.9343	28.238	1.34617	3.41287	8.84517	3.86354	12.933	58.5491	38.2609	85.7999	9.20416	95.9816	37.8956	1.44405	12.3338	0.0616605	0	11.7605	3.81129	12.3838	0	43.0557	10.6573	0.116655	8.69417	17.635	0	0	13.0894	0.224977	0.0103426
330714	2002	330714	203756	4447745	10010.4	2002	1999	2001	3	13	1	0	0	2.35	23.62	6.21664	0.300719	26.6799	44.9343	28.238	1.87774	3.28673	10.0014	4.10098	13.7411	58.9977	33.6593	83.8747	9.20416	95.9816	40.7102	1.44405	12.3488	0.103323	0	11.7222	3.66297	19.518	0	35.8664	10.7856	0.23331	10.9095	15.5507	0	0	19.1402	0.229999	0.0206852
330714	2003	330714	203756	4447745	10010.4	2003	1999	2001	2	15	0	0	0	0.86	21.97	6.21664	0.300719	26.6799	44.9343	28.238	2.40931	3.16058	11.1576	4.33843	14.5492	59.4463	29.0578	81.9495	9.20416	95.9816	43.5248	1.44405	12.3638	0.144985	0	11.6838	3.51465	26.6523	0	28.6771	10.9139	0.349965	13.1249	13.4665	0	0	25.1909	0.23502	0.0310279
330714	2004	330714	203756	4447745	10010.4	2004	1999	2001	3	12	0	2	0	30.2	16.33	6.21664	0.300719	26.6799	44.9343	28.238	2.94087	3.03444	12.3138	4.57587	15.3573	59.8949	24.4563	80.0244	9.20416	95.9816	46.3395	1.44405	12.3788	0.186648	0	11.6455	3.36633	33.7866	0	21.4879	11.0422	0.46662	15.3402	11.3822	0	0	31.2417	0.240041	0.0413705
330714	2005	330714	203756	4447745	10010.4	2005	1999	2001	6	11	4	0	0	15.6	37.53	6.21664	0.300719	26.6799	44.9343	28.238	3.47244	2.90829	13.47	4.81332	16.1653	60.3435	19.8547	78.0992	9.20416	95.9816	49.1541	1.44405	12.3938	0.22831	0	11.6072	3.21801	40.9209	0	14.2986	11.1705	0.583275	17.5556	9.29794	0	0	37.2925	0.245063	0.0517131
330714	2006	330714	203756	4447745	10010.4	2006	2009	2001	2	16	2	0	0	14	49.13	6.21664	0.300719	26.6799	44.9343	28.238	4.00401	2.78214	14.6262	5.05076	16.9734	60.7922	15.2532	76.174	9.20416	95.9816	51.9687	1.44405	12.4088	0.269973	0	11.5688	3.06969	48.0552	0	7.10929	11.2989	0.69993	19.7709	7.21368	0	0	43.3433	0.250084	0.0620557
330714	2007	330714	203756	4447745	10010.4	2007	2009	2001	4	16	2	0	0	4.32	63.01	6.21664	0.300719	26.6799	44.9343	28.238	4.53558	2.656	15.7823	5.28821	17.7815	61.2408	10.6517	74.2488	9.20416	95.9816	54.7834	1.44405	12.4088	0.269973	0	11.5688	3.06969	48.0552	0	7.10929	11.2989	0.69993	19.7709	7.21368	0	0	43.3433	0.250084	0.0620557
330714	2008	330714	203756	4447745	10010.4	2008	2009	2001	3	17	2	0	0	5.93	64.98	6.21664	0.300719	26.6799	44.9343	28.238	5.59871	2.4037	18.0947	5.7631	19.3977	62.138	1.4486	70.3984	9.20416	95.9816	60.4126	1.44405	12.4088	0.269973	0	11.5688	3.06969	48.0552	0	7.10929	11.2989	0.69993	19.7709	7.21368	0	0	49.3941	0.255105	0.0723983
330715	1979	330715	203081	4.43776e+06	10010.5	1979	1972	1981	0	1	0	0	0	0	200	33.2058	2.67093	57.4125	5.4413	11.134	4.789	3.29093	25.9963	22.5081	14.1734	43.8534	26.2515	46.105	58.1603	78.9085	17.2585	78.7629	4.84242	0.2001	0	3.96198	1.29565	41.6358	0	20.3052	26.3332	1.38069	16.4058	10.3677	0.003	1.15558	14.4722	0.0850425	0.050025
330715	1980	330715	203081	4.43776e+06	10010.5	1980	1982	1981	2	1	0	1	1	1330	200	33.3734	2.67093	57.4125	5.4413	11.134	5	3.25247	25.2355	25.1571	14.459	44.2421	26.8722	44.1597	58.1603	78.9085	17.2585	78.7629	4.89388	0.205817	0	4.01058	1.34639	40.9162	0	19.4169	27.5809	1.57793	17.0699	10.7569	0.006	1.32066	13.108	0.0971914	0.0571714
330715	1981	330715	203081	4.43776e+06	10010.5	1981	1982	1981	0	3	0	0	0	0	1530	33.537	2.71897	56.4274	5.69068	11.6429	5.212	3.214	24.4747	27.8061	14.7447	44.6309	27.4929	42.2145	58.1603	78.9085	17.2585	78.7629	4.94533	0.211534	0	4.05917	1.39713	40.1965	0	18.5286	28.8287	1.77517	17.734	11.1461	0.009	1.48574	11.7437	0.10934	0.0643179
330715	1982	330715	203081	4.43776e+06	10010.5	1982	1982	1981	0	2	0	0	0	0	1330	33.7005	2.76701	55.4422	5.94006	12.1519	5.423	3.17553	23.7139	30.455	15.0303	45.0196	28.1136	40.2692	58.1603	78.9085	17.2585	78.7629	4.99678	0.217251	0	4.10777	1.44787	39.4769	0	17.6402	30.0765	1.97242	18.3981	11.5352	0.012	1.65083	10.3795	0.121489	0.0714643
330715	1983	330715	203081	4.43776e+06	10010.5	1983	1982	1981	0	2	0	0	0	0	1330	33.8641	2.81505	54.4571	6.18944	12.6609	4.961	3.18133	21.9056	26.7396	14.6795	46.4324	28.9663	46.0863	51.4062	81.5902	17.354	67.6444	5.04824	0.222969	0	4.15636	1.49861	38.7572	0	16.7519	31.3242	2.16966	19.0622	11.9244	0.015	1.81591	9.01522	0.133638	0.0786107
330715	1984	330715	203081	4.43776e+06	10010.5	1984	1982	1981	1	2	0	0	1	1050	1330	34.0276	2.8631	53.472	6.43883	13.1699	4.49896	3.18713	20.0973	23.0241	14.3287	47.8452	29.819	51.9034	44.6521	84.2718	17.4494	56.5258	5.09969	0.228686	0	4.20496	1.54935	38.0376	0	15.8636	32.572	2.3669	19.7263	12.3135	0.018	1.98099	7.65097	0.145787	0.0857571
330715	1985	330715	203081	4.43776e+06	10010.5	1985	1982	1981	0	3	0	0	0	0	2380	34.1912	2.91114	52.4869	6.68821	13.6788	4.03694	3.19293	18.2889	19.3087	13.9778	49.258	30.6717	57.7204	37.898	86.9535	17.5449	45.4073	5.15115	0.234403	0	4.25356	1.60009	37.3179	0	14.9753	33.8198	2.56414	20.3904	12.7027	0.021	2.14607	6.28671	0.157936	0.0929036
330715	1986	330715	203081	4.43776e+06	10010.5	1986	1989	1991	1	1	1	0	0	1.8	1050	34.3547	2.95918	51.5018	6.93759	14.1878	3.57492	3.19872	16.4806	15.5932	13.627	50.6708	31.5244	63.5375	31.1439	89.6351	17.6404	34.2888	5.2026	0.24012	0	4.30215	1.65082	36.5983	0	14.087	35.0675	2.76138	21.0545	13.0919	0.03	2.31116	4.92246	0.170085	0.10005
330715	1987	330715	203081	4.43776e+06	10010.5	1987	1989	1991	1	2	0	1	0	90	1051.8	34.5182	3.00722	50.5167	7.18697	14.6968	3.1129	3.20452	14.6723	11.8777	13.2762	52.0836	32.3771	69.3545	24.3898	92.3167	17.7359	23.1703	5.10612	0.223683	0	4.37933	1.53291	35.6871	0	14.6073	35.6107	2.72208	20.3304	13.2029	0.029	2.15251	4.99178	0.157936	0.110055
330715	1988	330715	203081	4.43776e+06	10010.5	1988	1989	1991	2	3	1	0	0	7	1141.8	34.6818	3.05526	49.5316	7.43635	15.2057	2.65089	3.21032	12.8639	8.16229	12.9253	53.4964	33.2298	75.1716	17.6357	94.9984	17.8313	12.0518	5.00965	0.207246	0	4.45651	1.41499	34.776	0	15.1276	36.1538	2.68277	19.6063	13.3139	0	1.99385	5.0611	0.145787	0.12006
330715	1989	330715	203081	4.43776e+06	10010.5	1989	1989	1991	1	5	1	0	0	6	1148.8	34.8453	3.1033	48.5465	7.68573	15.7147	2.18887	3.21612	11.0556	4.44683	12.5745	54.9092	34.0825	80.9887	10.8816	97.68	17.9268	0.933263	4.91317	0.19081	0	4.5337	1.29708	33.8648	0	15.6478	36.6969	2.64346	18.8821	13.4249	0	1.8352	5.13042	0.133638	0.130065
330715	1990	330715	203081	4.43776e+06	10010.5	1990	1989	1991	0	5	0	0	0	0	104.8	35.0089	3.15135	47.5614	7.93511	16.2237	2.0149	3.19958	11.432	4.4195	12.8801	55.2653	35.123	80.9321	11.6778	96.9489	21.4045	1.05451	4.81669	0.174373	0	4.61088	1.17916	32.9536	0	16.1681	37.24	2.60416	18.158	13.5359	0	1.67655	5.19974	0.121489	0.14007
330715	1991	330715	203081	4.43776e+06	10010.5	1991	1989	1991	2	5	0	1	1	250	104.8	35.332	3.07944	46.8538	11.0417	16.6388	1.84094	3.18304	11.8084	4.39216	13.1857	55.6214	36.1634	80.8756	12.474	96.2178	24.8822	1.17577	4.72022	0.157936	0	4.68806	1.06124	32.0424	0	16.6883	37.7832	2.56485	17.4339	13.6469	0	1.5179	5.26906	0.10934	0.150075
330715	1992	330715	203081	4.43776e+06	10010.5	1992	1989	1991	2	6	1	0	0	2.5	353	35.6551	3.00754	46.1463	14.1482	17.0539	1.66698	3.16651	12.1848	4.36483	13.4913	55.9775	37.2038	80.8191	13.2702	95.4868	28.3599	1.29702	4.62374	0.141499	0	4.76524	0.943329	31.1313	0	17.2086	38.3263	2.52555	16.7098	13.7579	0	1.35925	5.33838	0.0971914	0.16008
330715	1993	330715	203081	4.43776e+06	10010.5	1993	1989	1991	2	7	0	0	1	175.1	265.5	35.9782	2.93564	45.4388	17.2547	17.4689	1.49301	3.14997	12.5612	4.33749	13.7969	56.3336	38.2442	80.7625	14.0664	94.7557	31.8376	1.41827	4.52726	0.125062	0	4.84242	0.825412	30.2201	0	17.7289	38.8694	2.48624	15.9856	13.8689	0	1.2006	5.4077	0.0850425	0.170085
330715	1994	330715	203081	4.43776e+06	10010.5	1994	1989	1991	5	7	2	1	0	27.5	433.6	36.3013	2.86374	44.7312	20.3613	17.884	1.31905	3.13343	12.9377	4.31016	14.1025	56.6897	39.2846	80.706	14.8625	94.0246	35.3153	1.53952	4.43079	0.108626	0	4.9196	0.707496	29.3089	0	18.2491	39.4126	2.44694	15.2615	13.9799	0	1.04195	5.47702	0.0728936	0.18009
330715	1995	330715	203081	4.43776e+06	10010.5	1995	1989	1991	5	11	2	1	0	29	455.1	36.6245	2.79184	44.0237	23.4678	18.2991	1.14509	3.11689	13.3141	4.28282	14.4081	57.0458	40.325	80.6495	15.6587	93.2935	38.7929	1.66077	4.33431	0.0921889	0	4.99678	0.58958	28.3978	0	18.7694	39.9557	2.40763	14.5374	14.0909	0	0.883299	5.54634	0.0607446	0.190095
330715	1996	330715	203081	4.43776e+06	10010.5	1996	1999	2001	15	16	8	1	1	254	484.1	36.9476	2.71994	43.3162	26.5744	18.7142	0.971124	3.10036	13.6905	4.25549	14.7137	57.4019	41.3654	80.5929	16.4549	92.5624	42.2706	1.78203	4.23783	0.0757521	0	5.07397	0.471664	27.4866	0	19.2896	40.4988	2.36833	13.8133	14.2019	0	0.724648	5.61566	0.0485957	0.2001
330715	1997	330715	203081	4.43776e+06	10010.5	1997	1999	2001	0	29	0	0	0	0	488.1	37.2707	2.64804	42.6086	29.6809	19.1293	0.79716	3.08382	14.0669	4.22815	15.0193	57.758	42.4058	80.5364	17.2511	91.8313	45.7483	1.90328	4.14136	0.0593154	0	5.15115	0.353748	26.5754	0	19.8099	41.0419	2.32902	13.0891	14.3129	0	0.565997	5.68498	0.0364468	0.210105
330715	1998	330715	203081	4.43776e+06	10010.5	1998	1999	2001	0	27	0	0	0	0	485.6	37.5938	2.57614	41.9011	32.7875	19.5444	0.623197	3.06728	14.4433	4.20082	15.3249	58.1141	43.4462	80.4798	18.0473	91.1002	49.226	2.02453	4.04488	0.0428786	0	5.22833	0.235832	25.6643	0	20.3302	41.5851	2.28972	12.365	14.424	0	0.407347	5.75431	0.0242979	0.22011
330715	1999	330715	203081	4.43776e+06	10010.5	1999	1999	2001	0	25	0	0	0	0	310.5	37.9169	2.50424	41.1936	35.894	19.9595	0.449233	3.05074	14.8197	4.17348	15.6305	58.4702	44.4866	80.4233	18.8434	90.3691	52.7037	2.14578	3.9484	0.0264418	0	5.30551	0.117916	24.7531	0	20.8504	42.1282	2.25041	11.6409	14.535	0	0.248696	5.82363	0.0121489	0.230115
330715	2000	330715	203081	4.43776e+06	10010.5	2000	1999	2001	1	20	0	1	0	30	283	38.2401	2.43234	40.486	39.0006	20.3746	0.933038	2.95991	15.5564	4.43253	16.4863	58.7314	40.1991	78.9436	18.8434	90.3691	52.2672	2.14578	3.85193	0.010005	0	5.38269	0	23.8419	0	21.3707	42.6713	2.21111	10.9168	14.646	0	0.090045	5.89295	0	0.24012
330715	2001	330715	203081	4.43776e+06	10010.5	2001	1999	2001	0	16	0	0	0	0	284	38.2401	2.43234	40.486	39.0006	20.3746	1.41684	2.86907	16.2931	4.69157	17.3422	58.9927	35.9115	77.464	18.8434	90.3691	51.8307	2.14578	3.93697	0.010005	0	5.38269	0	26.3699	0	18.9995	42.4896	2.15108	12.1975	13.4795	0	0.0833737	7.51607	0	0.238107
330715	2002	330715	203081	4.43776e+06	10010.5	2002	1999	2001	3	1	1	0	0	5.1	30	38.2401	2.43234	40.486	39.0006	20.3746	1.90065	2.77824	17.0297	4.95062	18.198	59.2539	31.624	75.9843	18.8434	90.3691	51.3942	2.14578	4.02201	0.010005	0	5.38269	0	28.8978	0	16.6283	42.3078	2.09105	13.4783	12.3131	0	0.0767024	9.13919	0	0.236094
330715	2003	330715	203081	4.43776e+06	10010.5	2003	1999	2001	2	4	1	0	0	3.02	35.1	38.2401	2.43234	40.486	39.0006	20.3746	2.38445	2.68741	17.7664	5.20966	19.0539	59.5152	27.3364	74.5047	18.8434	90.3691	50.9577	2.14578	4.10705	0.010005	0	5.38269	0	31.4257	0	14.2571	42.1261	2.03102	14.759	11.1467	0	0.070031	10.7623	0	0.234081
330715	2004	330715	203081	4.43776e+06	10010.5	2004	1999	2001	2	6	1	1	0	18	38.12	38.2401	2.43234	40.486	39.0006	20.3746	2.86826	2.59657	18.503	5.46871	19.9097	59.7764	23.0489	73.025	18.8434	90.3691	50.5212	2.14578	4.1921	0.010005	0	5.38269	0	33.9536	0	11.8859	41.9443	1.97099	16.0398	9.98024	0	0.0633597	12.3854	0	0.232069
330715	2005	330715	203081	4.43776e+06	10010.5	2005	1999	2001	3	8	0	1	0	15.51	56.12	38.2401	2.43234	40.486	39.0006	20.3746	3.35206	2.50574	19.2397	5.72775	20.7655	60.0377	18.7613	71.5454	18.8434	90.3691	50.0847	2.14578	4.27714	0.010005	0	5.38269	0	36.4816	0	9.51476	41.7625	1.91096	17.3205	8.81381	0	0.0566884	14.0086	0	0.230056
330715	2006	330715	203081	4.43776e+06	10010.5	2006	2009	2001	0	10	0	0	0	0	41.63	38.2401	2.43234	40.486	39.0006	20.3746	3.83587	2.4149	19.9763	5.9868	21.6214	60.2989	14.4737	70.0657	18.8434	90.3691	49.6482	2.14578	4.36218	0.010005	0	5.38269	0	39.0095	0	7.14357	41.5808	1.85092	18.6013	7.64738	0	0.0500171	15.6317	0	0.228043
330715	2007	330715	203081	4.43776e+06	10010.5	2007	2009	2001	2	10	1	1	0	19	41.63	38.2401	2.43234	40.486	39.0006	20.3746	4.31967	2.32407	20.713	6.24584	22.4772	60.5602	10.1862	68.5861	18.8434	90.3691	49.2117	2.14578	4.36218	0.010005	0	5.38269	0	39.0095	0	7.14357	41.5808	1.85092	18.6013	7.64738	0	0.0500171	15.6317	0	0.228043
330715	2008	330715	203081	4.43776e+06	10010.5	2008	2009	2001	6	9	1	1	0	20.78	55.53	38.2401	2.43234	40.486	39.0006	20.3746	5.28728	2.1424	22.1863	6.76394	24.1889	61.0827	1.61106	65.6268	18.8434	90.3691	48.3387	2.14578	4.36218	0.010005	0	5.38269	0	39.0095	0	7.14357	41.5808	1.85092	18.6013	7.64738	0	0.0433458	17.2548	0	0.22603
330803	1979	330803	221238	4.55685e+06	10007.1	1979	1972	1981	0	0	0	0	0	0	0	2.10988	0.02115	90.0653	0.037562	1.09116	0	0.933528	44.697	2.92317	67.2649	47.2862	7.08152	51.9655	74.985	11.6985	26.7535	20.5652	66.4082	0.030015	0	0	3.64682	5.46773	0	20.7204	2.21611	1.51076	0.476062	16.5281	0.036	0.230115	5.06253	0	0.04002
330803	1980	330803	221238	4.55685e+06	10007.1	1980	1982	1981	0	0	0	0	0	0	0	2.00661	0.02115	90.0653	0.037562	1.09116	0	0.897995	45.9663	3.3324	67.7868	47.4654	7.40154	50.3874	74.985	11.6985	26.7535	20.5652	66.4532	0.0271564	0	0	3.78904	5.42986	0	20.4602	2.11391	1.72658	0.484038	17.1004	0.032	0.262989	4.82813	0	0.0457371
330803	1981	330803	221238	4.55685e+06	10007.1	1981	1982	1981	0	0	0	0	0	0	0	1.95849	0.0433123	88.308	0.325271	1.68577	0	0.862463	47.2356	3.74162	68.3086	47.6447	7.72157	48.8094	74.985	11.6985	26.7535	20.5652	66.4982	0.0242979	0	0	3.93125	5.39198	0	20.2001	2.01172	1.9424	0.492014	17.6728	0.028	0.295862	4.59373	0	0.0514543
330803	1982	330803	221238	4.55685e+06	10007.1	1982	1982	1981	0	0	0	0	0	0	0	1.91037	0.0654746	86.5508	0.612981	2.28037	0	0.826931	48.5049	4.15085	68.8304	47.824	8.0416	47.2313	74.985	11.6985	26.7535	20.5652	66.5433	0.0214393	0	0	4.07347	5.35411	0	19.94	1.90953	2.15822	0.499989	18.2451	0.024	0.328736	4.35932	0	0.0571714
330803	1983	330803	221238	4.55685e+06	10007.1	1983	1982	1981	0	0	0	0	0	0	0	1.86225	0.0876369	84.7935	0.90069	2.87497	0	0.813839	49.5048	4.47753	69.5913	46.9196	7.07424	45.656	74.8704	23.0407	27.0104	17.7405	66.5883	0.0185807	0	0	4.21568	5.31623	0	19.6798	1.80733	2.37404	0.507965	18.8175	0.02	0.361609	4.12492	0	0.0628886
330803	1984	330803	221238	4.55685e+06	10007.1	1984	1982	1981	0	0	0	0	0	0	0	1.81412	0.109799	83.0363	1.1884	3.46957	0	0.800748	50.5047	4.80422	70.3523	46.0153	6.10688	44.0807	74.7557	34.3829	27.2672	14.9159	66.6333	0.0157221	0	0	4.35789	5.27835	0	19.4197	1.70514	2.58987	0.515941	19.3898	0.016	0.394483	3.89052	0	0.0686057
330803	1985	330803	221238	4.55685e+06	10007.1	1985	1982	1981	0	0	0	0	0	0	0	1.766	0.131962	81.2791	1.47611	4.06417	0	0.787657	51.5046	5.1309	71.1132	45.1109	5.13952	42.5054	74.6411	45.7252	27.5241	12.0912	66.6783	0.0128636	0	0	4.50011	5.24048	0	19.1596	1.60294	2.80569	0.523917	19.9622	0.012	0.427356	3.65611	0	0.0743229
330803	1986	330803	221238	4.55685e+06	10007.1	1986	1989	1991	0	0	0	0	0	0	0	1.71788	0.154124	79.5218	1.76382	4.65877	0	0.774566	52.5045	5.45758	71.8741	44.2066	4.17216	40.9301	74.5264	57.0674	27.7809	9.26661	66.7234	0.010005	0	0	4.64232	5.2026	0	18.8995	1.50075	3.02151	0.531893	20.5345	0	0.46023	3.42171	0	0.08004
330803	1987	330803	221238	4.55685e+06	10007.1	1987	1989	1991	1	0	0	0	1	3600	0	1.66976	0.176286	77.7646	2.05153	5.25338	0	0.761474	53.5044	5.78427	72.6351	43.3022	3.2048	39.3548	74.4118	68.4096	28.0378	6.44197	64.8188	0.00929036	0	0	5.15043	4.90245	0	20.1315	1.46359	3.41028	0.530721	20.8151	0	0.441649	3.431	0	0.0871864
330803	1988	330803	221238	4.55685e+06	10007.1	1988	1989	1991	1	1	1	0	0	10	3600	1.62164	0.198448	76.0073	2.33924	5.84798	0	0.748383	54.5043	6.11095	73.396	42.3979	2.23745	37.7795	74.2971	79.7518	28.2946	3.61733	62.9143	0.00857571	0	0	5.65854	4.6023	0	21.3635	1.42643	3.79904	0.52955	21.0958	0.089	0.423069	3.44029	0	0.0943329
330803	1989	330803	221238	4.55685e+06	10007.1	1989	1989	1991	0	2	0	0	0	0	3610	1.57352	0.220611	74.2501	2.62695	6.44258	0	0.735292	55.5042	6.43763	74.1569	41.4936	1.27009	36.2042	74.1825	91.094	28.5515	0.792694	61.0098	0.00786107	0	0	6.16665	4.30215	0	22.5956	1.38927	4.18781	0.528378	21.3764	0.087	0.404488	3.44958	0	0.101479
330803	1990	330803	221238	4.55685e+06	10007.1	1990	1989	1991	4	2	3	0	0	5.3	3610	1.5254	0.242773	72.4929	2.91466	7.03718	0	0.725602	56.0353	6.0232	74.7407	41.7446	1.58358	36.2617	73.9444	90.6389	29.5381	0.769	59.1053	0.00714643	0	0	6.67477	4.002	0	23.8276	1.3521	4.57657	0.527207	21.6571	0.086	0.385907	3.45887	0	0.108626
330803	1991	330803	221238	4.55685e+06	10007.1	1991	1989	1991	3	6	0	0	0	0.9	3615.3	1.48624	0.223394	70.051	7.35294	6.78501	0	0.715911	56.5664	5.60876	75.3244	41.9957	1.89707	36.3192	73.7064	90.1839	30.5247	0.745306	57.2007	0.00643179	0	0	7.18288	3.70185	0	25.0597	1.31494	4.96534	0.526035	21.9377	0.084	0.367326	3.46816	0	0.115772
330803	1992	330803	221238	4.55685e+06	10007.1	1992	1989	1991	1	9	1	0	0	2.5	3616.2	1.44708	0.204016	67.6091	11.7912	6.53285	0	0.706221	57.0975	5.19433	75.9082	42.2468	2.21056	36.3767	73.4683	89.7289	31.5112	0.721612	55.2962	0.00571714	0	0	7.69099	3.4017	0	26.2917	1.27778	5.35411	0.524864	22.2183	0.083	0.348746	3.47745	0	0.122919
330803	1993	330803	221238	4.55685e+06	10007.1	1993	1989	1991	1	9	0	0	0	0.7	18.7	1.40792	0.184638	65.1672	16.2295	6.28068	0	0.696531	57.6287	4.7799	76.4919	42.4979	2.52405	36.4342	73.2303	89.2739	32.4978	0.697918	53.3917	0.0050025	0	0	8.1991	3.10155	0	27.5238	1.24062	5.74287	0.523692	22.499	0.081	0.330165	3.48674	0	0.130065
330803	1994	330803	221238	4.55685e+06	10007.1	1994	1989	1991	4	9	0	0	0	1.2	9.4	1.36877	0.165259	62.7253	20.6678	6.02851	0	0.686841	58.1598	4.36546	77.0757	42.749	2.83754	36.4917	72.9922	88.8188	33.4844	0.674223	51.4872	0.00428786	0	0	8.70721	2.8014	0	28.7558	1.20346	6.13164	0.522521	22.7796	0.08	0.311584	3.49603	0	0.137211
330803	1995	330803	221238	4.55685e+06	10007.1	1995	1989	1991	5	13	0	0	0	1.1	10.6	1.32961	0.14588	60.2834	25.1061	5.77634	0	0.67715	58.6909	3.95103	77.6594	43	3.15103	36.5492	72.7541	88.3638	34.471	0.650529	49.5826	0.00357321	0	0	9.21532	2.50125	0	29.9879	1.1663	6.5204	0.52135	23.0603	0.079	0.293004	3.50532	0	0.144358
330803	1996	330803	221238	4.55685e+06	10007.1	1996	1999	2001	1	14	0	1	0	15	6.4	1.29045	0.126502	57.8415	29.5444	5.52417	0	0.66746	59.222	3.53659	78.2432	43.2511	3.46452	36.6067	72.5161	87.9088	35.4576	0.626835	47.6781	0.00285857	0	0	9.72343	2.2011	0	31.2199	1.12914	6.90917	0.520178	23.3409	0.077	0.274423	3.51461	0	0.151504
330803	1997	330803	221238	4.55685e+06	10007.1	1997	1999	2001	0	12	0	0	0	0	20.5	1.25129	0.107123	55.3996	33.9827	5.27201	0	0.65777	59.7531	3.12216	78.8269	43.5022	3.77801	36.6642	72.278	87.4537	36.4441	0.603141	45.7736	0.00214393	0	0	10.2315	1.90095	0	32.4519	1.09197	7.29793	0.519007	23.6215	0.076	0.255842	3.5239	0	0.158651
330803	1998	330803	221238	4.55685e+06	10007.1	1998	1999	2001	0	11	0	0	0	0	18	1.21213	0.087745	52.9578	38.421	5.01984	0	0.64808	60.2842	2.70773	79.4107	43.7533	4.0915	36.7217	72.0399	86.9987	37.4307	0.579447	43.8691	0.00142929	0	0	10.7397	1.6008	0	33.684	1.05481	7.6867	0.517835	23.9022	0.074	0.237261	3.5332	0	0.165797
330803	1999	330803	221238	4.55685e+06	10007.1	1999	1999	2001	0	10	0	0	0	0	17.3	1.17297	0.0683665	50.5159	42.8592	4.76767	0	0.638389	60.8153	2.29329	79.9944	44.0044	4.40499	36.7792	71.8019	86.5437	38.4173	0.555753	41.9646	0.000714643	0	0	11.2478	1.30065	0	34.916	1.01765	8.07547	0.516664	24.1828	0.073	0.218681	3.54249	0	0.172944
330803	2000	330803	221238	4.55685e+06	10007.1	2000	1999	2001	1	6	0	1	0	18	16.1	1.13382	0.048988	48.074	47.2975	4.51551	0.766727	0.632098	59.7554	2.94627	80.0733	43.6004	4.53127	36.4214	71.8019	86.5437	38.8294	0.555753	40.06	0	0	0	11.7559	1.0005	0	36.1481	0.98049	8.46423	0.515492	24.4635	0.09	0.2001	3.55178	0	0.18009
330803	2001	330803	221238	4.55685e+06	10007.1	2001	1999	2001	2	2	0	0	0	1.5	33	1.13382	0.048988	48.074	47.2975	4.51551	1.53345	0.625807	58.6956	3.59925	80.1522	43.1965	4.65754	36.0636	71.8019	86.5437	39.2416	0.555753	40.07	0	0	0	11.7525	0.998833	0	36.1414	0.983825	8.50759	0.515492	24.4669	0.09	0.16675	2.95981	0	0.150075
330803	2002	330803	221238	4.55685e+06	10007.1	2002	1999	2001	0	3	0	0	0	0	19.5	1.13382	0.048988	48.074	47.2975	4.51551	2.30018	0.619516	57.6357	4.25223	80.2311	42.7926	4.78382	35.7059	71.8019	86.5437	39.6537	0.555753	40.08	0	0	0	11.7492	0.997165	0	36.1347	0.98716	8.55094	0.515492	24.4703	0.09	0.1334	2.36785	0	0.12006
330803	2003	330803	221238	4.55685e+06	10007.1	2003	1999	2001	3	3	1	2	0	69.43	19.5	1.13382	0.048988	48.074	47.2975	4.51551	3.06691	0.613225	56.5758	4.90521	80.3099	42.3886	4.91009	35.3481	71.8019	86.5437	40.0659	0.555753	40.09	0	0	0	11.7459	0.995498	0	36.1281	0.990495	8.5943	0.515492	24.4738	0.09	0.10005	1.77589	0	0.090045
330803	2004	330803	221238	4.55685e+06	10007.1	2004	1999	2001	0	6	0	0	0	0	88.93	1.13382	0.048988	48.074	47.2975	4.51551	3.83363	0.606934	55.5159	5.55818	80.3888	41.9847	5.03636	34.9903	71.8019	86.5437	40.478	0.555753	40.1001	0	0	0	11.7425	0.99383	0	36.1214	0.99383	8.63765	0.515492	24.4772	0.09	0.0667	1.18393	0	0.06003
330803	2005	330803	221238	4.55685e+06	10007.1	2005	1999	2001	2	6	0	0	0	0.8	88.93	1.13382	0.048988	48.074	47.2975	4.51551	4.60036	0.600643	54.456	6.21116	80.4677	41.5808	5.16264	34.6325	71.8019	86.5437	40.8901	0.555753	40.1101	0	0	0	11.7392	0.992162	0	36.1147	0.997165	8.68101	0.515492	24.4806	0.09	0.03335	0.591963	0	0.030015
330803	2006	330803	221238	4.55685e+06	10007.1	2006	2009	2001	1	7	1	0	0	1.3	71.73	1.13382	0.048988	48.074	47.2975	4.51551	5.36709	0.594352	53.3961	6.86414	80.5466	41.1768	5.28891	34.2748	71.8019	86.5437	41.3023	0.555753	40.1201	0	0	0	11.7359	0.990495	0	36.1081	1.0005	8.72436	0.515492	24.4841	0.09	0	0	0	0
330803	2007	330803	221238	4.55685e+06	10007.1	2007	2009	2001	1	6	0	0	1	670	71.53	1.13382	0.048988	48.074	47.2975	4.51551	6.13381	0.588061	52.3362	7.51712	80.6255	40.7729	5.41519	33.917	71.8019	86.5437	41.7144	0.555753	40.1201	0	0	0	11.7359	0.990495	0	36.1081	1.0005	8.72436	0.515492	24.4841	0.09	0	0	0	0
330803	2008	330803	221238	4.55685e+06	10007.1	2008	2009	2001	0	7	0	0	0	0	741.53	1.13382	0.048988	48.074	47.2975	4.51551	7.66727	0.575478	50.2164	8.82308	80.7832	39.965	5.66774	33.2014	71.8019	86.5437	42.5387	0.555753	40.1201	0	0	0	11.7359	0.990495	0	36.1081	1.0005	8.72436	0.515492	24.4841	0.09	0	0	0	0
330804	1979	330804	220550	4.54687e+06	10006.5	1979	1972	1981	0	0	0	0	0	0	0	6.03847	0.149964	76.8371	2.4053	10.7145	0.019	1.29678	53.0435	8.34519	50.2181	52.1253	14.4506	38.1967	57.2819	57.5652	25.6933	14.8647	43.6725	0.140056	0	0	2.91617	11.3946	0	20.2431	19.4328	2.20088	5.77424	27.4254	0.143	0.235094	11.6647	0.090036	1.09544
330804	1980	330804	220550	4.54687e+06	10006.5	1980	1982	1981	0	0	0	0	0	0	0	5.88286	0.149964	76.8371	2.4053	10.7145	0.013	1.21907	54.5426	8.96198	51.4407	52.4044	14.7084	36.181	57.2819	57.5652	25.6933	14.8647	43.606	0.131481	0	0	3.32705	10.7257	0	20.7483	18.9462	2.51529	5.49187	28.2694	0.146	0.268679	10.1155	0.0771737	1.25193
330804	1981	330804	220550	4.54687e+06	10006.5	1981	1982	1981	0	0	0	0	0	0	0	5.88525	0.157887	76.3024	2.34738	10.7432	0.006	1.14136	56.0418	9.57877	52.6633	52.6836	14.9662	34.1653	57.2819	57.5652	25.6933	14.8647	43.5396	0.122906	0	0	3.73792	10.0569	0	21.2535	18.4595	2.8297	5.2095	29.1134	0.149	0.302264	8.56628	0.0643114	1.40842
330804	1982	330804	220550	4.54687e+06	10006.5	1982	1982	1981	0	0	0	0	0	0	0	5.88764	0.16581	75.7676	2.28945	10.7718	0	1.06366	57.5409	10.1956	53.886	52.9627	15.224	32.1496	57.2819	57.5652	25.6933	14.8647	43.4731	0.114331	0	0	4.1488	9.38804	0	21.7587	17.9729	3.14412	4.92714	29.9574	0.152	0.335849	7.01709	0.0514491	1.56491
330804	1983	330804	220550	4.54687e+06	10006.5	1983	1982	1981	0	0	0	0	0	0	0	5.89003	0.173732	75.2328	2.23153	10.8005	0.186	1.02375	56.8618	8.99286	54.509	51.6768	13.9962	33.6438	58.5744	63.3001	26.1281	12.8486	43.4066	0.105757	0	0	4.55968	8.7192	0	22.2639	17.4863	3.45853	4.64477	30.8014	0.155	0.369433	5.4679	0.0385869	1.7214
330804	1984	330804	220550	4.54687e+06	10006.5	1984	1982	1981	0	0	0	0	0	0	0	5.89242	0.181655	74.698	2.1736	10.8292	0.37187	0.983847	56.1827	7.79015	55.1319	50.3908	12.7683	35.138	59.8669	69.0349	26.5628	10.8326	43.3402	0.0971817	0	0	4.97056	8.05036	0	22.7691	16.9997	3.77294	4.3624	31.6454	0.158	0.403018	3.91871	0.0257246	1.87789
330804	1985	330804	220550	4.54687e+06	10006.5	1985	1982	1981	0	0	0	0	0	0	0	5.89481	0.189578	74.1633	2.11568	10.8579	0.557805	0.943943	55.5036	6.58745	55.7549	49.1049	11.5405	36.6322	61.1594	74.7697	26.9976	8.8165	43.2737	0.0886069	0	0	5.38144	7.38152	0	23.2743	16.513	4.08735	4.08003	32.4893	0.161	0.436603	2.36952	0.0128623	2.03438
330804	1986	330804	220550	4.54687e+06	10006.5	1986	1989	1991	0	0	0	0	0	0	0	5.8972	0.197501	73.6285	2.05775	10.8866	0.743739	0.904039	54.8245	5.38475	56.3779	47.819	10.3126	38.1263	62.4519	80.5045	27.4323	6.80043	43.2073	0.080032	0	0	5.79232	6.71268	0	23.7795	16.0264	4.40176	3.79767	33.3333	0.17	0.470188	0.820328	0	2.19088
330804	1987	330804	220550	4.54687e+06	10006.5	1987	1989	1991	0	0	0	0	0	0	0	5.89959	0.205424	73.0937	1.99983	10.9153	0.929674	0.864134	54.1453	4.18205	57.0009	46.533	9.08476	39.6205	63.7444	86.2394	27.867	4.78436	41.9768	0.0743154	0	0	5.44075	7.61662	0	23.3836	15.807	5.70085	4.39912	32.5655	0.168	0.499485	1.87432	0	2.38167
330804	1988	330804	220550	4.54687e+06	10006.5	1988	1989	1991	0	0	0	0	0	0	0	5.90197	0.213346	72.5589	1.9419	10.944	1.11561	0.82423	53.4662	2.97935	57.6239	45.2471	7.8569	41.1147	65.0369	91.9742	28.3018	2.76829	40.7463	0.0685989	0	0	5.08918	8.52055	0	22.9878	15.5877	6.99994	5.00057	31.7976	0.079	0.528783	2.92831	0	2.57246
330804	1989	330804	220550	4.54687e+06	10006.5	1989	1989	1991	0	0	0	0	0	0	0	5.90436	0.221269	72.0242	1.88398	10.9727	1.30154	0.784326	52.7871	1.77665	58.2469	43.9612	6.62905	42.6089	66.3294	97.709	28.7365	0.752227	39.5158	0.0628823	0	0	4.73761	9.42448	0	22.5919	15.3683	8.29903	5.60202	31.0298	0.077	0.55808	3.98231	0	2.76325
330804	1990	330804	220550	4.54687e+06	10006.5	1990	1989	1991	1	0	0	0	0	1	0	5.90675	0.229192	71.4894	1.82605	11.0014	1.17139	0.767813	53.5	1.76245	59.059	43.1907	6.67366	42.1819	65.6425	96.6029	29.6564	0.719455	38.2853	0.0571657	0	0	4.38604	10.3284	0	22.196	15.1489	9.59813	6.20347	30.2619	0.076	0.587378	5.0363	0	2.95404
330804	1991	330804	220550	4.54687e+06	10006.5	1991	1989	1991	1	1	0	0	0	1	1	5.82431	0.213209	65.5069	8.42277	11.9441	1.04124	0.751299	54.2128	1.74826	59.8712	42.4203	6.71827	41.7549	64.9555	95.4967	30.5762	0.686683	37.0548	0.0514491	0	0	4.03447	11.2324	0	21.8001	14.9295	10.8972	6.80492	29.4941	0.074	0.616675	6.09029	0	3.14483
330804	1992	330804	220550	4.54687e+06	10006.5	1992	1989	1991	0	2	0	0	0	0	2	5.74186	0.197225	59.5244	15.0195	12.8868	0.911081	0.734786	54.9257	1.73406	60.6833	41.6498	6.76287	41.3279	64.2685	94.3906	31.496	0.653911	35.8243	0.0457326	0	0	3.6829	12.1363	0	21.4043	14.7102	12.1963	7.40637	28.7262	0.073	0.645973	7.14429	0	3.33562
330804	1993	330804	220550	4.54687e+06	10006.5	1993	1989	1991	0	2	0	0	0	0	2	5.65941	0.181242	53.5419	21.6162	13.8295	0.780926	0.718273	55.6385	1.71987	61.4954	40.8794	6.80748	40.901	63.5815	93.2844	32.4159	0.621139	34.5938	0.040016	0	0	3.33133	13.0402	0	21.0084	14.4908	13.4954	8.00782	27.9584	0.071	0.67527	8.19828	0	3.52641
330804	1994	330804	220550	4.54687e+06	10006.5	1994	1989	1991	0	2	0	0	0	0	2	5.57696	0.165258	47.5594	28.2129	14.7722	0.650772	0.70176	56.3514	1.70567	62.3075	40.1089	6.85209	40.474	62.8946	92.1783	33.3357	0.588367	33.3633	0.0342994	0	0	2.97976	13.9441	0	20.6125	14.2714	14.7945	8.60927	27.1905	0.07	0.704567	9.25227	0	3.7172
330804	1995	330804	220550	4.54687e+06	10006.5	1995	1989	1991	1	2	0	0	0	0	2	5.49451	0.149275	41.5769	34.8096	15.7149	0.520618	0.685246	57.0642	1.69148	63.1197	39.3385	6.8967	40.047	62.2076	91.0721	34.2555	0.555595	32.1329	0.0285829	0	0	2.62819	14.8481	0	20.2167	14.052	16.0936	9.21072	26.4227	0.069	0.733865	10.3063	0	3.90799
330804	1996	330804	220550	4.54687e+06	10006.5	1996	1999	2001	1	2	0	1	0	12	1	5.41206	0.133292	35.5943	41.4064	16.6577	0.390463	0.668733	57.7771	1.67728	63.9318	38.568	6.9413	39.62	61.5206	89.9659	35.1753	0.522823	30.9024	0.0228663	0	0	2.27662	15.752	0	19.8208	13.8327	17.3927	9.81217	25.6548	0.067	0.763162	11.3603	0	4.09878
330804	1997	330804	220550	4.54687e+06	10006.5	1997	1999	2001	0	2	0	0	0	0	12	5.32961	0.117308	29.6118	48.0031	17.6004	0.260309	0.65222	58.4899	1.66309	64.7439	37.7976	6.98591	39.193	60.8337	88.8598	36.0952	0.490051	29.6719	0.0171497	0	0	1.92506	16.6559	0	19.4249	13.6133	18.6918	10.4136	24.887	0.066	0.79246	12.4143	0	4.28957
330804	1998	330804	220550	4.54687e+06	10006.5	1998	1999	2001	1	2	0	1	0	29	12	5.24716	0.101325	23.6293	54.5998	18.5431	0.130154	0.635707	59.2028	1.64889	65.5561	37.0271	7.03052	38.766	60.1467	87.7536	37.015	0.457279	28.4414	0.0114331	0	0	1.57349	17.5599	0	19.029	13.3939	19.9909	11.0151	24.1191	0.064	0.821757	13.4682	0	4.48036
330804	1999	330804	220550	4.54687e+06	10006.5	1999	1999	2001	0	3	0	0	0	0	41	5.16471	0.0853414	17.6468	61.1965	19.4858	0	0.619193	59.9156	1.6347	66.3682	36.2567	7.07513	38.339	59.4597	86.6475	37.9348	0.424507	27.2109	0.00571657	0	0	1.22192	18.4638	0	18.6332	13.1746	21.2899	11.6165	23.3513	0.063	0.851055	14.5222	0	4.67115
330804	2000	330804	220550	4.54687e+06	10006.5	2000	1999	2001	0	3	0	0	0	0	41	5.08226	0.069358	11.6643	67.7932	20.4285	0.434074	0.623724	59.0735	2.49881	66.515	37.6335	6.8624	37.8845	59.4597	86.6475	38.4157	0.424507	25.9804	0	0	0	0.870348	19.3677	0	18.2373	12.9552	22.589	12.218	22.5834	0.08	0.880352	15.5762	0	4.86195
330804	2001	330804	220550	4.54687e+06	10006.5	2001	1999	2001	1	2	1	0	0	1.5	41	5.08226	0.069358	11.6643	67.7932	20.4285	0.868149	0.628254	58.2315	3.36292	66.6618	39.0104	6.64966	37.43	59.4597	86.6475	38.8965	0.424507	25.9804	0	0	0	0.870348	19.3744	0	18.234	12.9468	22.594	12.223	22.5807	0.08	0.733627	12.9802	0	4.05162
330804	2002	330804	220550	4.54687e+06	10006.5	2002	1999	2001	1	2	1	0	0	1.5	30.5	5.08226	0.069358	11.6643	67.7932	20.4285	1.30222	0.632784	57.3894	4.22703	66.8086	40.3872	6.43693	36.9754	59.4597	86.6475	39.3773	0.424507	25.9804	0	0	0	0.870348	19.3811	0	18.2306	12.9385	22.599	12.228	22.578	0.08	0.586901	10.3842	0	3.2413
330804	2003	330804	220550	4.54687e+06	10006.5	2003	1999	2001	4	3	1	1	1	362	32	5.08226	0.069358	11.6643	67.7932	20.4285	1.7363	0.637314	56.5473	5.09114	66.9554	41.764	6.2242	36.5209	59.4597	86.6475	39.8582	0.424507	25.9804	0	0	0	0.870348	19.3878	0	18.2273	12.9302	22.604	12.233	22.5753	0.08	0.440176	7.78812	0	2.43097
330804	2004	330804	220550	4.54687e+06	10006.5	2004	1999	2001	0	6	0	0	0	0	365	5.08226	0.069358	11.6643	67.7932	20.4285	2.17037	0.641844	55.7052	5.95524	67.1023	43.1409	6.01147	36.0663	59.4597	86.6475	40.339	0.424507	25.9804	0	0	0	0.870348	19.3944	0	18.224	12.9218	22.609	12.238	22.5726	0.08	0.293451	5.19208	0	1.62065
330804	2005	330804	220550	4.54687e+06	10006.5	2005	1999	2001	1	6	0	0	0	0.4	365	5.08226	0.069358	11.6643	67.7932	20.4285	2.60445	0.646375	54.8631	6.81935	67.2491	44.5177	5.79874	35.6118	59.4597	86.6475	40.8199	0.424507	25.9804	0	0	0	0.870348	19.4011	0	18.2206	12.9135	22.614	12.243	22.5699	0.08	0.146725	2.59604	0	0.810324
330804	2006	330804	220550	4.54687e+06	10006.5	2006	2009	2001	1	7	0	0	0	1	365.4	5.08226	0.069358	11.6643	67.7932	20.4285	3.03852	0.650905	54.0211	7.68346	67.3959	45.8946	5.586	35.1572	59.4597	86.6475	41.3007	0.424507	25.9804	0	0	0	0.870348	19.4078	0	18.2173	12.9052	22.619	12.2479	22.5671	0.08	0	0	0	0
330804	2007	330804	220550	4.54687e+06	10006.5	2007	2009	2001	1	7	0	0	0	0.3	364.9	5.08226	0.069358	11.6643	67.7932	20.4285	3.47259	0.655435	53.179	8.54757	67.5427	47.2714	5.37327	34.7027	59.4597	86.6475	41.7815	0.424507	25.9804	0	0	0	0.870348	19.4078	0	18.2173	12.9052	22.619	12.2479	22.5671	0.08	0	0	0	0
330804	2008	330804	220550	4.54687e+06	10006.5	2008	2009	2001	1	7	1	0	0	2.1	363.7	5.08226	0.069358	11.6643	67.7932	20.4285	4.34074	0.664496	51.4948	10.2758	67.8363	50.0251	4.94781	33.7936	59.4597	86.6475	42.7432	0.424507	25.9804	0	0	0	0.870348	19.4078	0	18.2173	12.9052	22.619	12.2479	22.5671	0.08	0	0	0	0
330805	1979	330805	219863	4536894	10006.5	1979	1972	1981	0	0	0	0	0	0	0	3.82115	0.109525	64.3518	7.96015	4.82272	0.07	0.714106	54.4239	4.07153	59.3563	42.6161	16.5327	41.0621	58.0348	1.98038	33.5781	37.4381	79.2926	0.105063	0	0	1.95617	5.21813	0	11.1367	1.80108	0.360216	0.178934	12.0301	0	0	14.4172	0.0350175	0
330805	1980	330805	219863	4536894	10006.5	1980	1982	1981	0	0	0	0	0	0	0	3.63665	0.109525	64.3518	7.96015	4.82272	0.047	0.687675	56.093	3.97124	61.2338	41.2242	17.8056	39.5992	58.0348	1.98038	33.5781	37.4381	78.7415	0.107207	0	0	2.23563	5.29746	0	11.1081	1.96832	0.411675	0.204496	13.3809	0	0	12.8479	0.04002	0
330805	1981	330805	219863	4536894	10006.5	1981	1982	1981	0	0	0	0	0	0	0	3.53786	0.11884	61.9585	8.37719	6.32295	0.023	0.661245	57.762	3.87095	63.1113	39.8322	19.0785	38.1363	58.0348	1.98038	33.5781	37.4381	78.1905	0.109351	0	0	2.51508	5.3768	0	11.0795	2.13557	0.463135	0.230058	14.7317	0	0	11.2785	0.0450225	0
330805	1982	330805	219863	4536894	10006.5	1982	1982	1981	0	0	0	0	0	0	0	3.43907	0.128154	59.5651	8.79423	7.82317	0	0.634814	59.4311	3.77066	64.9888	38.4402	20.3514	36.6733	58.0348	1.98038	33.5781	37.4381	77.6394	0.111495	0	0	2.79453	5.45613	0	11.0509	2.30281	0.514594	0.25562	16.0824	0	0	9.70914	0.050025	0
330805	1983	330805	219863	4536894	10006.5	1983	1982	1981	0	0	0	0	0	0	0	3.34028	0.137468	57.1718	9.21127	9.3234	0.001	0.627319	57.7669	3.29892	66.9729	38.9884	17.8431	38.6652	59.7956	15.5813	33.6685	32.1693	77.0884	0.11364	0	0	3.07399	5.53546	0	11.0223	2.47005	0.566054	0.281182	17.4332	0	0	8.13978	0.0550275	0
330805	1984	330805	219863	4536894	10006.5	1984	1982	1981	0	0	0	0	0	0	0	3.24149	0.146783	54.7785	9.62831	10.8236	0.00268571	0.619825	56.1027	2.82718	68.957	39.5366	15.3349	40.657	61.5564	29.1823	33.759	26.9005	76.5374	0.115784	0	0	3.35344	5.6148	0	10.9937	2.6373	0.617513	0.306744	18.784	0	0	6.57043	0.06003	0
330805	1985	330805	219863	4536894	10006.5	1985	1982	1981	0	0	0	0	0	0	0	3.1427	0.156098	52.3851	10.0453	12.3239	0.00402857	0.61233	54.4385	2.35544	70.941	40.0848	12.8266	42.6489	63.3172	42.7833	33.8494	21.6317	75.9863	0.117928	0	0	3.63289	5.69413	0	10.9652	2.80454	0.668973	0.332306	20.1348	0	0	5.00107	0.0650325	0
330805	1986	330805	219863	4536894	10006.5	1986	1989	1991	0	0	0	0	0	0	0	3.04391	0.165412	49.9918	10.4624	13.8241	0.00537143	0.604835	52.7743	1.8837	72.9251	40.633	10.3184	44.6407	65.078	56.3842	33.9398	16.3629	75.4353	0.120072	0	0	3.91235	5.77346	0	10.9366	2.97178	0.720432	0.357868	21.4856	0	0	3.43172	0.070035	0
330805	1987	330805	219863	4536894	10006.5	1987	1989	1991	1	0	0	0	1	250	0	2.94512	0.174727	47.5984	10.8794	15.3243	0.00671429	0.597341	51.1101	1.41197	74.9092	41.1812	7.81014	46.6326	66.8388	69.9852	34.0302	11.0941	74.7391	0.114354	0	0	3.74725	5.62266	0	10.7922	2.91532	1.94831	0.341984	22.1836	0	0.0521689	3.73901	0.0650325	0.0914743
330805	1988	330805	219863	4536894	10006.5	1988	1989	1991	2	1	2	0	0	6	250	2.84633	0.184041	45.2051	11.2965	16.8245	0.00805714	0.589846	49.4459	0.94023	76.8932	41.7294	5.30189	48.6244	68.5996	83.5862	34.1206	5.82527	74.043	0.108637	0	0	3.58215	5.47185	0	10.6478	2.85886	3.17619	0.326099	22.8815	0.059	0.104338	4.04631	0.06003	0.182949
330805	1989	330805	219863	4536894	10006.5	1989	1989	1991	1	3	1	0	0	3	256	2.74754	0.193356	42.8118	11.7135	18.3248	0.0094	0.582352	47.7817	0.468492	78.8773	42.2776	2.79364	50.6162	70.3604	97.1872	34.211	0.556474	73.3469	0.102919	0	0	3.41705	5.32105	0	10.5034	2.8024	4.40407	0.310215	23.5795	0.057	0.156507	4.35361	0.0550275	0.274423
330805	1990	330805	219863	4536894	10006.5	1990	1989	1991	0	4	0	0	0	0	259	2.64875	0.20267	40.4184	12.1305	19.825	0.00846	0.58795	49.0509	0.450529	79.2119	42.5065	3.19245	49.4659	69.2148	94.419	36.7024	0.545635	72.6507	0.0972011	0	0	3.25195	5.17024	0	10.3591	2.74593	5.63195	0.29433	24.2775	0.056	0.208676	4.6609	0.050025	0.365897
330805	1991	330805	219863	4536894	10006.5	1991	1989	1991	0	4	0	0	0	0	259	2.56565	0.186901	39.2143	15.3208	20.5889	0.00752	0.593549	50.3201	0.432565	79.5464	42.7354	3.59127	48.3156	68.0693	91.6508	39.1937	0.534795	71.9546	0.0914834	0	0	3.08685	5.01944	0	10.2147	2.68947	6.85983	0.278446	24.9755	0.054	0.260845	4.9682	0.0450225	0.457371
330805	1992	330805	219863	4536894	10006.5	1992	1989	1991	0	4	0	0	0	0	259	2.48256	0.171132	38.0101	18.5111	21.3529	0.00658	0.599147	51.5892	0.414602	79.8809	42.9643	3.99008	47.1652	66.9238	88.8826	41.6851	0.523956	71.2585	0.0857657	0	0	2.92175	4.86864	0	10.0703	2.63301	8.08771	0.262561	25.6734	0.053	0.313014	5.2755	0.04002	0.548846
330805	1993	330805	219863	4536894	10006.5	1993	1989	1991	0	3	0	0	0	0	9	2.39946	0.155363	36.806	21.7014	22.1169	0.00564	0.604745	52.8584	0.396639	80.2155	43.1932	4.38889	46.0149	65.7782	86.1145	44.1764	0.513117	70.5623	0.080048	0	0	2.75665	4.71783	0	9.92596	2.57655	9.31559	0.246677	26.3714	0.051	0.365183	5.58279	0.0350175	0.64032
330805	1994	330805	219863	4536894	10006.5	1994	1989	1991	0	1	0	0	0	0	3	2.31637	0.139594	35.6018	24.8917	22.8809	0.0047	0.610344	54.1276	0.378675	80.55	43.4221	4.78771	44.8646	64.6327	83.3463	46.6678	0.502278	69.8662	0.0743303	0	0	2.59156	4.56703	0	9.78158	2.52008	10.5435	0.230793	27.0694	0.05	0.417351	5.89009	0.030015	0.731794
330805	1995	330805	219863	4536894	10006.5	1995	1989	1991	0	0	0	0	0	0	0	2.23327	0.123826	34.3977	28.082	23.6448	0.00376	0.615942	55.3967	0.360712	80.8845	43.651	5.18652	43.7142	63.4871	80.5781	49.1591	0.491438	69.1701	0.0686126	0	0	2.42646	4.41622	0	9.63721	2.46362	11.7713	0.214908	27.7674	0.049	0.46952	6.19738	0.0250125	0.823269
330805	1996	330805	219863	4536894	10006.5	1996	1999	2001	1	0	0	0	0	0.1	0	2.15018	0.108057	33.1935	31.2723	24.4088	0.00282	0.62154	56.6659	0.342748	81.2191	43.8799	5.58534	42.5639	62.3416	77.81	51.6505	0.480599	68.4739	0.0628949	0	0	2.26136	4.26542	0	9.49284	2.40716	12.9992	0.199024	28.4653	0.047	0.521689	6.50468	0.02001	0.914743
330805	1997	330805	219863	4536894	10006.5	1997	1999	2001	0	1	0	0	0	0	0.1	2.06709	0.0922877	31.9894	34.4626	25.1728	0.00188	0.627139	57.9351	0.324785	81.5536	44.1088	5.98415	41.4135	61.1961	75.0418	54.1418	0.46976	67.7778	0.0571771	0	0	2.09626	4.11461	0	9.34847	2.3507	14.2271	0.183139	29.1633	0.046	0.573858	6.81198	0.0150075	1.00622
330805	1998	330805	219863	4536894	10006.5	1998	1999	2001	0	1	0	0	0	0	0.1	1.98399	0.0765188	30.7852	37.6529	25.9367	0.00094	0.632737	59.2042	0.306822	81.8882	44.3377	6.38297	40.2632	60.0505	72.2736	56.6332	0.45892	67.0817	0.0514594	0	0	1.93116	3.96381	0	9.20409	2.29423	15.455	0.167255	29.8613	0.044	0.626027	7.11927	0.010005	1.09769
330805	1999	330805	219863	4536894	10006.5	1999	1999	2001	0	1	0	0	0	0	0.1	1.9009	0.0607499	29.5811	40.8432	26.7007	0	0.638335	60.4734	0.288858	82.2227	44.5666	6.78178	39.1129	58.905	69.5054	59.1245	0.448081	66.3855	0.0457417	0	0	1.76606	3.813	0	9.05972	2.23777	16.6829	0.15137	30.5593	0.043	0.678196	7.42657	0.0050025	1.18917
330805	2000	330805	219863	4536894	10006.5	2000	1999	2001	0	1	0	0	0	0	0.1	1.8178	0.044981	28.3769	44.0335	27.4647	0.432424	0.639936	59.3701	1.1127	80.5796	44.8526	6.42288	38.9617	58.905	69.5054	58.5843	0.448081	65.6894	0.040024	0	0	1.60096	3.6622	0	8.91535	2.18131	17.9107	0.135486	31.2573	0.06	0.730365	7.73387	0	1.28064
330805	2001	330805	219863	4536894	10006.5	2001	1999	2001	1	1	1	0	0	4	0.1	1.8178	0.044981	28.3769	44.0335	27.4647	0.864847	0.641538	58.2668	1.93654	78.9366	45.1386	6.06397	38.8106	58.905	69.5054	58.044	0.448081	65.6827	0.040024	0	0	1.60096	3.66386	0	8.91201	2.18464	17.9157	0.135486	31.2613	0.06	0.608638	6.44656	0	1.0672
330805	2002	330805	219863	4536894	10006.5	2002	1999	2001	0	1	0	0	0	0	4	1.8178	0.044981	28.3769	44.0335	27.4647	1.29727	0.643139	57.1634	2.76038	77.2935	45.4246	5.70507	38.6595	58.905	69.5054	57.5038	0.448081	65.6761	0.040024	0	0	1.60096	3.66553	0	8.90868	2.18798	17.9208	0.135486	31.2654	0.06	0.48691	5.15925	0	0.85376
330805	2003	330805	219863	4536894	10006.5	2003	1999	2001	0	1	0	0	0	0	4	1.8178	0.044981	28.3769	44.0335	27.4647	1.72969	0.64474	56.0601	3.58422	75.6505	45.7106	5.34617	38.5083	58.905	69.5054	56.9635	0.448081	65.6694	0.040024	0	0	1.60096	3.6672	0	8.90534	2.19131	17.9258	0.135486	31.2694	0.06	0.365183	3.87194	0	0.64032
330805	2004	330805	219863	4536894	10006.5	2004	1999	2001	0	1	0	0	0	0	4	1.8178	0.044981	28.3769	44.0335	27.4647	2.16212	0.646341	54.9568	4.40806	74.0074	45.9966	4.98726	38.3572	58.905	69.5054	56.4233	0.448081	65.6627	0.040024	0	0	1.60096	3.66887	0	8.90201	2.19465	17.9308	0.135486	31.2734	0.06	0.243455	2.58463	0	0.42688
330805	2005	330805	219863	4536894	10006.5	2005	1999	2001	0	1	0	0	0	0	4	1.8178	0.044981	28.3769	44.0335	27.4647	2.59454	0.647942	53.8535	5.2319	72.3644	46.2826	4.62836	38.206	58.905	69.5054	55.8831	0.448081	65.6561	0.040024	0	0	1.60096	3.67054	0	8.89867	2.19799	17.9358	0.135486	31.2775	0.06	0.121728	1.29732	0	0.21344
330805	2006	330805	219863	4536894	10006.5	2006	2009	2001	0	1	0	0	0	0	4	1.8178	0.044981	28.3769	44.0335	27.4647	3.02697	0.649543	52.7502	6.05574	70.7213	46.5686	4.26945	38.0549	58.905	69.5054	55.3428	0.448081	65.6494	0.040024	0	0	1.60096	3.6722	0	8.89534	2.20132	17.9408	0.135486	31.2815	0.06	0	0.010005	0	0
330805	2007	330805	219863	4536894	10006.5	2007	2009	2001	0	0	0	0	0	0	0	1.8178	0.044981	28.3769	44.0335	27.4647	3.45939	0.651145	51.6468	6.87959	69.0783	46.8546	3.91055	37.9038	58.905	69.5054	54.8026	0.448081	65.6494	0.040024	0	0	1.60096	3.6722	0	8.89534	2.20132	17.9408	0.135486	31.2815	0.06	0	0.010005	0	0
330805	2008	330805	219863	4536894	10006.5	2008	2009	2001	1	0	0	0	0	0.67	0	1.8178	0.044981	28.3769	44.0335	27.4647	4.32424	0.654347	49.4402	8.52727	65.7921	47.4265	3.19274	37.6015	58.905	69.5054	53.7221	0.448081	65.6494	0.040024	0	0	1.60096	3.6722	0	8.89534	2.20132	17.9408	0.135486	31.2815	0.06	0	0	0	0
330806	1979	330806	219178	4.52691e+06	10007	1979	1972	1981	0	0	0	0	0	0	0	5.96997	0.293797	57.0873	10.8392	8.73794	0.232	1.42484	55.0675	2.09907	39.4543	40.2725	21.8405	42.1237	64.5615	11.8868	31.0876	33.1634	73.4994	0.215086	0	0	1.85074	9.4888	0	14.3758	0.535214	0	0.267486	5.31507	0.014	0	15.101	0.05002	0
330806	1980	330806	219178	4.52691e+06	10007	1980	1982	1981	0	0	0	0	0	0	0	5.79706	0.293797	57.0873	10.8392	8.73794	0.213	1.38878	55.1557	2.39783	41.2365	39.6986	23.3236	41.8763	64.5615	11.8868	31.0876	33.1634	73.0092	0.21723	0	0	2.09941	9.37232	0	14.6516	0.611673	0	0.305698	5.97733	0.028	0	13.0638	0.0571657	0
330806	1981	330806	219178	4.52691e+06	10007	1981	1982	1981	0	0	0	0	0	0	0	5.74823	0.341001	55.3619	10.4544	9.8928	0.194	1.35272	55.2439	2.6966	43.0187	39.1247	24.8068	41.6289	64.5615	11.8868	31.0876	33.1634	72.519	0.219373	0	0	2.34808	9.25585	0	14.9274	0.688132	0	0.343911	6.63959	0.042	0	11.0266	0.0643114	0
330806	1982	330806	219178	4.52691e+06	10007	1982	1982	1981	0	0	0	0	0	0	0	5.69939	0.388205	53.6364	10.0696	11.0477	0.175	1.31666	55.3321	2.99536	44.8009	38.5507	26.2899	41.3815	64.5615	11.8868	31.0876	33.1634	72.0288	0.221517	0	0	2.59675	9.13937	0	15.2032	0.764591	0	0.382123	7.30185	0.056	0	8.98931	0.0714571	0
330806	1983	330806	219178	4.52691e+06	10007	1983	1982	1981	0	0	0	0	0	0	0	5.65055	0.435409	51.911	9.68486	12.2025	0.156	1.30924	54.2987	5.13848	46.3524	39.1673	24.6298	40.099	62.4177	24.2026	32.1004	28.494	71.5386	0.223661	0	0	2.84542	9.02289	0	15.479	0.841051	0	0.420335	7.96411	0.07	0	6.95207	0.0786029	0
330806	1984	330806	219178	4.52691e+06	10007	1984	1982	1981	0	0	0	0	0	0	0	5.60171	0.482613	50.1856	9.30007	13.3574	0.137124	1.30182	53.2653	7.2816	47.9038	39.7839	22.9696	38.8166	60.2739	36.5184	33.1133	23.8246	71.0484	0.225805	0	0	3.0941	8.90642	0	15.7549	0.91751	0	0.458548	8.62637	0.084	0	4.91482	0.0857486	0
330806	1985	330806	219178	4.52691e+06	10007	1985	1982	1981	0	0	0	0	0	0	0	5.55288	0.529817	48.4602	8.91529	14.5123	0.118107	1.2944	52.232	9.42471	49.4552	40.4005	21.3095	37.5341	58.1301	48.8342	34.1262	19.1551	70.5582	0.227948	0	0	3.34277	8.78994	0	16.0307	0.993969	0	0.49676	9.28863	0.098	0	2.87758	0.0928943	0
330806	1986	330806	219178	4.52691e+06	10007	1986	1989	1991	0	0	0	0	0	0	0	5.50404	0.57702	46.7348	8.5305	15.6671	0.0990896	1.28698	51.1986	11.5678	51.0067	41.0171	19.6493	36.2516	55.9864	61.15	35.1391	14.4857	70.068	0.230092	0	0	3.59144	8.67347	0	16.3065	1.07043	0	0.534972	9.95089	0.14	0	0.840336	0.10004	0
330806	1987	330806	219178	4.52691e+06	10007	1987	1989	1991	1	0	1	0	0	4	0	5.4552	0.624224	45.0093	8.14571	16.822	0.0800724	1.27956	50.1652	13.7109	52.5581	41.6338	17.9892	34.9692	53.8426	73.4658	36.152	9.8163	69.3113	0.213657	0	0	4.30029	8.59844	0	16.3022	1.0004	0.186503	0.567968	11.1764	0.138	0	0.977534	0.0928943	0
330806	1988	330806	219178	4.52691e+06	10007	1988	1989	1991	0	1	0	0	0	0	4	5.40637	0.671428	43.2839	7.76093	17.9768	0.0610552	1.27214	49.1318	15.8541	54.1096	42.2504	16.329	33.6867	51.6988	85.7816	37.1649	5.14688	68.5546	0.197222	0	0	5.00915	8.52341	0	16.2979	0.930372	0.373006	0.600963	12.4019	0.039	0	1.11473	0.0857486	0
330806	1989	330806	219178	4.52691e+06	10007	1989	1989	1991	5	1	3	0	0	11.5	4	5.35753	0.718632	41.5585	7.37614	19.1317	0.042038	1.26472	48.0984	17.9972	55.661	42.867	14.6689	32.4043	49.555	98.0974	38.1778	0.47746	67.7978	0.180787	0	0	5.718	8.44838	0	16.2937	0.860344	0.559509	0.633958	13.6274	0.037	0	1.25193	0.0786029	0
330806	1990	330806	219178	4.52691e+06	10007	1990	1989	1991	2	6	1	1	0	29	15.5	5.30869	0.765836	39.8331	6.99136	20.2866	0.0378342	1.21207	49.8089	16.2006	57.6616	42.2594	13.6918	32.6288	49.8089	95.9221	40.5119	0.474362	67.0411	0.164351	0	0	6.42686	8.37335	0	16.2894	0.790316	0.746013	0.666954	14.8529	0.036	0	1.38913	0.0714571	0
330806	1991	330806	219178	4.52691e+06	10007	1991	1989	1991	1	8	1	0	0	4	44.5	5.18472	0.716324	37.6218	11.9891	20.7774	0.0336304	1.15942	51.5194	14.4039	59.6623	41.6519	12.7147	32.8534	50.0627	93.7468	42.8461	0.471264	66.2844	0.147916	0	0	7.13571	8.29832	0	16.2851	0.720288	0.932516	0.699949	16.0784	0.034	0	1.52632	0.0643114	0
330806	1992	330806	219178	4.52691e+06	10007	1992	1989	1991	0	9	0	0	0	0	48.5	5.06075	0.666813	35.4105	16.9869	21.2682	0.0294266	1.10677	53.2299	12.6073	61.6629	41.0443	11.7376	33.0779	50.3165	91.5715	45.1803	0.468166	65.5276	0.131481	0	0	7.84457	8.22329	0	16.2808	0.65026	1.11902	0.732944	17.3039	0.033	0	1.66352	0.0571657	0
330806	1993	330806	219178	4.52691e+06	10007	1993	1989	1991	0	8	0	0	0	0	44.5	4.93678	0.617301	33.1992	21.9847	21.7591	0.0252228	1.05411	54.9404	10.8107	63.6635	40.4368	10.7605	33.3024	50.5703	89.3963	47.5145	0.465068	64.7709	0.115046	0	0	8.55342	8.14826	0	16.2765	0.580232	1.30552	0.76594	18.5294	0.031	0	1.80072	0.05002	0
330806	1994	330806	219178	4.52691e+06	10007	1994	1989	1991	1	8	0	0	0	0	44.5	4.81281	0.56779	30.9879	26.9825	22.2499	0.021019	1.00146	56.6509	9.01408	65.6642	39.8292	9.78336	33.527	50.8242	87.221	49.8487	0.461969	64.0142	0.0986109	0	0	9.26228	8.07323	0	16.2722	0.510204	1.49203	0.798935	19.7549	0.03	0	1.93792	0.0428743	0
330806	1995	330806	219178	4.52691e+06	10007	1995	1989	1991	3	4	2	1	0	19	33	4.68884	0.518278	28.7766	31.9803	22.7408	0.0168152	0.948809	58.3614	7.21746	67.6648	39.2217	8.80626	33.7515	51.078	85.0457	52.1829	0.458871	63.2574	0.0821757	0	0	9.97113	7.9982	0	16.2679	0.440176	1.67853	0.83193	20.9804	0.029	0	2.07512	0.0357286	0
330806	1996	330806	219178	4.52691e+06	10007	1996	1999	2001	0	5	0	0	0	0	23	4.56487	0.468766	26.5653	36.978	23.2316	0.0126114	0.896157	60.0719	5.42084	69.6654	38.6141	7.82916	33.9761	51.3318	82.8704	54.5171	0.455773	62.5007	0.0657406	0	0	10.68	7.92317	0	16.2636	0.370148	1.86503	0.864926	22.2059	0.027	0	2.21231	0.0285829	0
330806	1997	330806	219178	4.52691e+06	10007	1997	1999	2001	0	4	0	0	0	0	19	4.4409	0.419255	24.354	41.9758	23.7224	0.0084076	0.843505	61.7824	3.62422	71.666	38.0066	6.85206	34.2006	51.5857	80.6951	56.8513	0.452675	61.744	0.0493054	0	0	11.3888	7.84814	0	16.2594	0.30012	2.05153	0.897921	23.4314	0.026	0	2.34951	0.0214371	0
330806	1998	330806	219178	4.52691e+06	10007	1998	1999	2001	0	4	0	0	0	0	19	4.31693	0.369743	22.1427	46.9736	24.2133	0.0042038	0.790852	63.4929	1.8276	73.6667	37.399	5.87495	34.4252	51.8395	78.5198	59.1854	0.449577	60.9873	0.0328703	0	0	12.0977	7.77311	0	16.2551	0.230092	2.23804	0.930916	24.6569	0.024	0	2.48671	0.0142914	0
330806	1999	330806	219178	4.52691e+06	10007	1999	1999	2001	0	4	0	0	0	0	19	4.19296	0.320232	19.9314	51.9714	24.7041	0	0.7382	65.2034	0.0309774	75.6673	36.7915	4.89785	34.6497	52.0933	76.3446	61.5196	0.446479	60.2305	0.0164351	0	0	12.8066	7.69808	0	16.2508	0.160064	2.42454	0.963912	25.8824	0.023	0	2.62391	0.00714571	0
330806	2000	330806	219178	4.52691e+06	10007	2000	1999	2001	0	3	0	0	0	0	19	4.06899	0.27072	17.7201	56.9692	25.1949	0.088755	0.720552	62.7703	1.2711	75.6365	37.7509	4.86439	35.7553	52.0933	76.3446	61.1776	0.446479	59.4738	0	0	0	13.5154	7.62305	0	16.2465	0.090036	2.61104	0.996907	27.1079	0.04	0	2.7611	0	0
330806	2001	330806	219178	4.52691e+06	10007	2001	1999	2001	1	0	1	0	0	2	0	4.06899	0.27072	17.7201	56.9692	25.1949	0.17751	0.702905	60.3371	2.51122	75.6058	38.7102	4.83094	36.8608	52.0933	76.3446	60.8355	0.446479	59.4721	0	0	0	13.5171	7.62638	0	16.2482	0.0917033	2.60771	0.998572	27.1045	0.04	0	2.30425	0	0
330806	2002	330806	219178	4.52691e+06	10007	2002	1999	2001	0	1	0	0	0	0	2	4.06899	0.27072	17.7201	56.9692	25.1949	0.266265	0.685257	57.904	3.75134	75.575	39.6696	4.79748	37.9664	52.0933	76.3446	60.4934	0.446479	59.4705	0	0	0	13.5187	7.62972	0	16.2498	0.0933707	2.60437	1.00024	27.1012	0.04	0	1.84741	0	0
330806	2003	330806	219178	4.52691e+06	10007	2003	1999	2001	0	1	0	0	0	0	2	4.06899	0.27072	17.7201	56.9692	25.1949	0.35502	0.667609	55.4708	4.99147	75.5442	40.6289	4.76402	39.0719	52.0933	76.3446	60.1514	0.446479	59.4688	0	0	0	13.5204	7.63305	0	16.2515	0.095038	2.60104	1.0019	27.0978	0.04	0	1.39056	0	0
330806	2004	330806	219178	4.52691e+06	10007	2004	1999	2001	0	1	0	0	0	0	2	4.06899	0.27072	17.7201	56.9692	25.1949	0.443775	0.649962	53.0376	6.23159	75.5135	41.5883	4.73057	40.1775	52.0933	76.3446	59.8093	0.446479	59.4671	0	0	0	13.5221	7.63639	0	16.2532	0.0967053	2.59771	1.00357	27.0944	0.04	0	0.933708	0	0
330806	2005	330806	219178	4.52691e+06	10007	2005	1999	2001	0	1	0	0	0	0	2	4.06899	0.27072	17.7201	56.9692	25.1949	0.53253	0.632314	50.6045	7.47171	75.4827	42.5477	4.69711	41.283	52.0933	76.3446	59.4673	0.446479	59.4655	0	0	0	13.5237	7.63972	0	16.2548	0.0983727	2.59437	1.00523	27.0911	0.04	0	0.476858	0	0
330806	2006	330806	219178	4.52691e+06	10007	2006	2009	2001	0	1	0	0	0	0	2	4.06899	0.27072	17.7201	56.9692	25.1949	0.621285	0.614666	48.1713	8.71183	75.452	43.507	4.66365	42.3886	52.0933	76.3446	59.1252	0.446479	59.4638	0	0	0	13.5254	7.64306	0	16.2565	0.10004	2.59104	1.0069	27.0877	0.04	0	0.0200093	0	0
330806	2007	330806	219178	4.52691e+06	10007	2007	2009	2001	2	0	0	0	0	0.1	0	4.06899	0.27072	17.7201	56.9692	25.1949	0.71004	0.597019	45.7382	9.95195	75.4212	44.4664	4.6302	43.4941	52.0933	76.3446	58.7831	0.446479	59.4638	0	0	0	13.5254	7.64306	0	16.2565	0.10004	2.59104	1.0069	27.0877	0.04	0	0.0200093	0	0
330806	2008	330806	219178	4.52691e+06	10007	2008	2009	2001	3	2	1	0	0	1.42	0.1	4.06899	0.27072	17.7201	56.9692	25.1949	0.88755	0.561723	40.8719	12.4322	75.3597	46.3851	4.56328	45.7052	52.0933	76.3446	58.099	0.446479	59.4638	0	0	0	13.5254	7.64306	0	16.2565	0.10004	2.59104	1.0069	27.0877	0.04	0	0	0	0
330807	1979	330807	218493	4516934	10007.4	1979	1972	1981	0	0	0	0	0	0	0	8.10777	0.180908	42.5878	9.62016	17.3551	0.08	1.39509	46.9298	4.98934	25.684	43.417	38.4092	47.54	35.7563	45.3326	48.0455	43.71	58.5293	0.26013	0	0	3.24662	17.1186	0	19.935	0.325163	0.115057	1.33524	7.18485	0	0.110055	24.5023	0.645323	0
330807	1980	330807	218493	4516934	10007.4	1980	1982	1981	0	0	0	0	0	0	0	7.92573	0.180908	42.5878	9.62016	17.3551	0.053	1.36797	48.9794	5.66837	26.0003	42.8283	39.4122	44.9524	35.7563	45.3326	48.0455	43.71	58.3092	0.261559	0	0	3.58465	16.7641	0	20.0672	0.344458	0.131494	1.52599	8.00353	0	0.125777	21.658	0.70035	0
330807	1981	330807	218493	4516934	10007.4	1981	1982	1981	0	0	0	0	0	0	0	7.84885	0.215093	42.1787	9.54666	17.8927	0.027	1.34086	51.0289	6.3474	26.3165	42.2396	40.4152	42.3649	35.7563	45.3326	48.0455	43.71	58.089	0.262989	0	0	3.92268	16.4096	0	20.1994	0.363753	0.147931	1.71674	8.82222	0	0.141499	18.8137	0.755378	0
330807	1982	330807	218493	4516934	10007.4	1982	1982	1981	0	0	0	0	0	0	0	7.77198	0.249277	41.7696	9.47315	18.4303	0.001	1.31374	53.0785	7.02643	26.6327	41.6508	41.4182	39.7774	35.7563	45.3326	48.0455	43.71	57.8689	0.264418	0	0	4.2607	16.0552	0	20.3316	0.383049	0.164368	1.90749	9.6409	0	0.157221	15.9694	0.810405	0
330807	1983	330807	218493	4516934	10007.4	1983	1982	1981	0	0	0	0	0	0	0	7.6951	0.283462	41.3606	9.39964	18.9679	0.001	1.28103	50.4231	6.77448	26.7655	43.4442	41.3239	42.5061	34.3804	52.7445	45.8068	37.5311	57.6488	0.265847	0	0	4.59873	15.7007	0	20.4638	0.402344	0.180805	2.09824	10.4596	0	0.172944	13.1251	0.865433	0
330807	1984	330807	218493	4516934	10007.4	1984	1982	1981	0	0	0	0	0	0	0	7.61822	0.317647	40.9515	9.32613	19.5055	0.000769809	1.24833	47.7677	6.52254	26.8982	45.2375	41.2297	45.2349	33.0046	60.1564	43.5682	31.3521	57.4287	0.267276	0	0	4.93675	15.3462	0	20.596	0.421639	0.197241	2.28899	11.2783	0	0.188666	10.2809	0.92046	0
330807	1985	330807	218493	4516934	10007.4	1985	1982	1981	0	0	0	0	0	0	0	7.54135	0.351832	40.5424	9.25262	20.0431	0.000663047	1.21562	45.1123	6.27059	27.0309	47.0309	41.1355	47.9637	31.6287	67.5683	41.3296	25.1732	57.2086	0.268706	0	0	5.27478	14.9918	0	20.7282	0.440935	0.213678	2.47974	12.0969	0	0.204388	7.43658	0.975487	0
330807	1986	330807	218493	4516934	10007.4	1986	1989	1991	0	0	0	0	0	0	0	7.46447	0.386016	40.1334	9.17912	20.5807	0.000556286	1.18291	42.4569	6.01865	27.1637	48.8243	41.0413	50.6924	30.2528	74.9803	39.0909	18.9942	56.9885	0.270135	0	0	5.61281	14.6373	0	20.8604	0.46023	0.230115	2.67048	12.9156	0	0.22011	4.5923	1.03052	0
330807	1987	330807	218493	4516934	10007.4	1987	1989	1991	0	0	0	0	0	0	0	7.3876	0.420201	39.7243	9.10561	21.1183	0.000449524	1.15021	39.8015	5.7667	27.2964	50.6176	40.9471	53.4212	28.877	82.3922	36.8523	12.8153	56.1402	0.300865	0	0	5.74001	14.6645	0	21.3285	0.46023	0.492389	2.79376	13.75	0	0.212964	4.67019	0.979775	0
330807	1988	330807	218493	4516934	10007.4	1988	1989	1991	0	0	0	0	0	0	0	7.31072	0.454386	39.3152	9.0321	21.6559	0.000342762	1.1175	37.1461	5.51476	27.4292	52.411	40.8529	56.15	27.5011	89.8041	34.6136	6.63635	55.2919	0.331594	0	0	5.86722	14.6916	0	21.7966	0.46023	0.754663	2.91704	14.5845	0	0.205817	4.74809	0.929036	0
330807	1989	330807	218493	4516934	10007.4	1989	1989	1991	1	0	0	1	0	12	0	7.23384	0.48857	38.9062	8.95859	22.1934	0.000236	1.08479	34.4907	5.26281	27.5619	54.2044	40.7587	58.8787	26.1253	97.216	32.375	0.457407	54.4437	0.362324	0	0	5.99443	14.7188	0	22.2647	0.46023	1.01694	3.04033	15.4189	0	0.198671	4.82598	0.878296	0
330807	1990	330807	218493	4516934	10007.4	1990	1989	1991	0	1	0	0	0	0	12	7.15697	0.522755	38.4971	8.88508	22.731	0.0002124	1.04424	35.1876	4.84235	29.5967	53.4729	38.6759	58.7276	27.6136	96.5684	34.6141	0.463214	53.5954	0.393054	0	0	6.12163	14.7459	0	22.7328	0.46023	1.27921	3.16361	16.2533	0	0.191524	4.90388	0.827556	0
330807	1991	330807	218493	4516934	10007.4	1991	1989	1991	0	1	0	0	0	0	12	7.01427	0.507945	36.2588	12.8052	24.0263	0.0001888	1.00369	35.8846	4.4219	31.6314	52.7415	36.593	58.5764	29.102	95.9207	36.8531	0.469022	52.7471	0.423783	0	0	6.24884	14.7731	0	23.2009	0.46023	1.54148	3.28689	17.0877	0	0.184378	4.98178	0.776817	0
330807	1992	330807	218493	4516934	10007.4	1992	1989	1991	0	1	0	0	0	0	12	6.87157	0.493134	34.0205	16.7252	25.3215	0.0001652	0.963132	36.5815	4.00144	33.6662	52.01	34.5102	58.4253	30.5903	95.2731	39.0922	0.474829	51.8988	0.454513	0	0	6.37605	14.8003	0	23.669	0.46023	1.80376	3.41017	17.9221	0	0.177231	5.05967	0.726077	0
330807	1993	330807	218493	4516934	10007.4	1993	1989	1991	0	1	0	0	0	0	12	6.72887	0.478324	31.7821	20.6453	26.6168	0.0001416	0.922578	37.2785	3.58099	35.701	51.2786	32.4273	58.2741	32.0787	94.6255	41.3313	0.480637	51.0505	0.485243	0	0	6.50325	14.8274	0	24.1371	0.46023	2.06603	3.53345	18.7565	0	0.170085	5.13757	0.675338	0
330807	1994	330807	218493	4516934	10007.4	1994	1989	1991	0	1	0	0	0	0	12	6.58617	0.463513	29.5438	24.5654	27.912	0.000118	0.882024	37.9754	3.16053	37.7358	50.5471	30.3445	58.123	33.567	93.9778	43.5704	0.486444	50.2022	0.515972	0	0	6.63046	14.8546	0	24.6052	0.46023	2.32831	3.65673	19.5909	0	0.162939	5.21546	0.624598	0
330807	1995	330807	218493	4516934	10007.4	1995	1989	1991	0	0	0	0	0	0	0	6.44347	0.448703	27.3055	28.4855	29.2073	9.44e-05	0.841471	38.6724	2.74008	39.7705	49.8157	28.2616	57.9718	35.0554	93.3302	45.8094	0.492251	49.354	0.546702	0	0	6.75766	14.8817	0	25.0733	0.46023	2.59058	3.78001	20.4253	0	0.155792	5.29336	0.573858	0
330807	1996	330807	218493	4516934	10007.4	1996	1999	2001	0	0	0	0	0	0	0	6.30077	0.433892	25.0671	32.4056	30.5025	7.08e-05	0.800917	39.3693	2.31962	41.8053	49.0842	26.1788	57.8207	36.5437	92.6825	48.0485	0.498059	48.5057	0.577431	0	0	6.88487	14.9089	0	25.5413	0.46023	2.85285	3.90329	21.2598	0	0.148646	5.37126	0.523119	0
330807	1997	330807	218493	4516934	10007.4	1997	1999	2001	0	0	0	0	0	0	0	6.15807	0.419081	22.8288	36.3256	31.7978	4.72e-05	0.760363	40.0663	1.89917	43.8401	48.3528	24.096	57.6695	38.0321	92.0349	50.2876	0.503866	47.6574	0.608161	0	0	7.01208	14.936	0	26.0094	0.46023	3.11513	4.02657	22.0942	0	0.141499	5.44915	0.472379	0
330807	1998	330807	218493	4516934	10007.4	1998	1999	2001	0	0	0	0	0	0	0	6.01537	0.404271	20.5905	40.2457	33.093	2.36e-05	0.71981	40.7632	1.47871	45.8748	47.6213	22.0131	57.5184	39.5204	91.3872	52.5267	0.509674	46.8091	0.638891	0	0	7.13928	14.9632	0	26.4775	0.46023	3.3774	4.14985	22.9286	0	0.134353	5.52705	0.421639	0
330807	1999	330807	218493	4516934	10007.4	1999	1999	2001	1	0	0	0	0	0.5	0	5.87268	0.38946	18.3522	44.1658	34.3883	0	0.679256	41.4602	1.05826	47.9096	46.8899	19.9303	57.3672	41.0088	90.7396	54.7657	0.515481	45.9608	0.66962	0	0	7.26649	14.9904	0	26.9456	0.46023	3.63968	4.27313	23.763	0	0.127206	5.60494	0.3709	0
330807	2000	330807	218493	4516934	10007.4	2000	1999	2001	0	1	0	0	0	0	0.5	5.72998	0.37465	16.1138	48.0859	35.6835	0.340847	0.678756	42.5474	1.93336	49.7052	46.277	18.634	55.0649	41.0088	90.7396	55.7109	0.515481	45.1126	0.70035	0	0	7.3937	15.0175	0	27.4137	0.46023	3.90195	4.39641	24.5974	0	0.12006	5.68284	0.32016	0
330807	2001	330807	218493	4516934	10007.4	2001	1999	2001	1	1	0	0	0	0.3	0.5	5.72998	0.37465	16.1138	48.0859	35.6835	0.681693	0.678255	43.6346	2.80846	51.5008	45.6642	17.3377	52.7625	41.0088	90.7396	56.6561	0.515481	44.9358	1.18393	0	0	7.40704	14.8624	0	27.2486	0.46023	3.90195	4.26069	24.5368	0	0.10005	4.7357	0.728422	0
330807	2002	330807	218493	4516934	10007.4	2002	1999	2001	1	2	0	0	0	0.05	0.8	5.72998	0.37465	16.1138	48.0859	35.6835	1.02254	0.677755	44.7218	3.68357	53.2964	45.0513	16.0414	50.4601	41.0088	90.7396	57.6013	0.515481	44.759	1.6675	0	0	7.42038	14.7074	0	27.0835	0.46023	3.90195	4.12497	24.4762	0	0.08004	3.78856	1.13668	0
330807	2003	330807	218493	4516934	10007.4	2003	1999	2001	0	3	0	0	0	0	0.85	5.72998	0.37465	16.1138	48.0859	35.6835	1.36339	0.677255	45.809	4.55867	55.092	44.4385	14.7451	48.1577	41.0088	90.7396	58.5465	0.515481	44.5823	2.15108	0	0	7.43372	14.5523	0	26.9185	0.46023	3.90195	3.98925	24.4156	0	0.06003	2.84142	1.54494	0
330807	2004	330807	218493	4516934	10007.4	2004	1999	2001	6	3	2	0	0	5.01	0.85	5.72998	0.37465	16.1138	48.0859	35.6835	1.70423	0.676754	46.8962	5.43377	56.8876	43.8256	13.4488	45.8554	41.0088	90.7396	59.4916	0.515481	44.4055	2.63465	0	0	7.44706	14.3972	0	26.7534	0.46023	3.90195	3.85354	24.355	0	0.04002	1.89428	1.95321	0
330807	2005	330807	218493	4516934	10007.4	2005	1999	2001	0	8	0	0	0	0	5.36	5.72998	0.37465	16.1138	48.0859	35.6835	2.04508	0.676254	47.9834	6.30888	58.6832	43.2128	12.1525	43.553	41.0088	90.7396	60.4368	0.515481	44.2288	3.11823	0	0	7.4604	14.2421	0	26.5883	0.46023	3.90195	3.71782	24.2944	0	0.02001	0.94714	2.36147	0
330807	2006	330807	218493	4516934	10007.4	2006	2009	2001	2	8	1	0	0	1.11	5.36	5.72998	0.37465	16.1138	48.0859	35.6835	2.38593	0.675754	49.0706	7.18398	60.4788	42.5999	10.8562	41.2506	41.0088	90.7396	61.382	0.515481	44.052	3.6018	0	0	7.47374	14.087	0	26.4232	0.46023	3.90195	3.5821	24.2338	0	0	0	2.76973	0
330807	2007	330807	218493	4516934	10007.4	2007	2009	2001	2	9	0	0	0	0.1	6.17	5.72998	0.37465	16.1138	48.0859	35.6835	2.72677	0.675253	50.1578	8.05908	62.2744	41.987	9.55988	38.9482	41.0088	90.7396	62.3272	0.515481	44.052	3.6018	0	0	7.47374	14.087	0	26.4232	0.46023	3.90195	3.5821	24.2338	0	0	0	2.76973	0
330807	2008	330807	218493	4516934	10007.4	2008	2009	2001	2	10	1	0	0	4.46	6.22	5.72998	0.37465	16.1138	48.0859	35.6835	3.40847	0.674253	52.3322	9.80929	65.8656	40.7613	6.96729	34.3435	41.0088	90.7396	64.2175	0.515481	44.052	3.6018	0	0	7.47374	14.087	0	26.4232	0.46023	3.90195	3.5821	24.2338	0	0	0	3.17799	0
330808	1979	330808	217810	4.50695e+06	10007.3	1979	1972	1981	0	1	0	0	0	0	26	20.083	0.332988	61.7665	5.39381	10.2008	0.301	2.4428	45.0137	6.4642	17.7856	48.9401	38.8886	47.7654	31.7734	37.2393	30.9519	47.7465	43.248	0.330099	0	0	2.43573	25.4476	0	25.3576	1.56047	0.570171	4.15681	10.675	0.015	0.25005	16.7784	0.610122	0
330808	1980	330808	217810	4.50695e+06	10007.3	1980	1982	1981	0	0	0	0	0	0	0	20.067	0.332988	61.7665	5.39381	10.2008	0.244	2.39784	46.5202	7.28519	18.1634	49.2476	39.6928	45.6047	31.7734	37.2393	30.9519	47.7465	43.1958	0.337244	0	0	2.65937	24.8432	0	25.4948	1.67908	0.651624	4.68675	11.5034	0.03	0.285771	15.0802	0.670134	0
330808	1981	330808	217810	4.50695e+06	10007.3	1981	1982	1981	0	0	0	0	0	0	0	19.9828	0.401216	59.2715	5.67635	11.5753	0.186	2.35288	48.0267	8.10618	18.5413	49.5552	40.497	43.4439	31.7734	37.2393	30.9519	47.7465	43.1437	0.344389	0	0	2.88301	24.2387	0	25.632	1.79768	0.733077	5.21668	12.3317	0.045	0.321493	13.382	0.730146	0
330808	1982	330808	217810	4.50695e+06	10007.3	1982	1982	1981	0	0	0	0	0	0	0	19.8987	0.469444	56.7765	5.95889	12.9499	0.129	2.30793	49.5333	8.92717	18.9191	49.8627	41.3012	41.2831	31.7734	37.2393	30.9519	47.7465	43.0915	0.351534	0	0	3.10665	23.6342	0	25.7692	1.91629	0.81453	5.74662	13.1601	0.06	0.357214	11.6838	0.790158	0
330808	1983	330808	217810	4.50695e+06	10007.3	1983	1982	1981	0	0	0	0	0	0	0	19.8146	0.537671	54.2815	6.24143	14.3244	0.12	2.23691	45.4131	8.49509	19.0507	51.3419	40.9557	45.649	31.9189	45.7304	30.4917	41.0333	43.0393	0.358679	0	0	3.33028	23.0298	0	25.9063	2.0349	0.895983	6.27655	13.9884	0.075	0.392936	9.98557	0.85017	0
330808	1984	330808	217810	4.50695e+06	10007.3	1984	1982	1981	0	0	0	0	0	0	0	19.7305	0.605899	51.7864	6.52397	15.699	0.110443	2.1659	41.293	8.06301	19.1822	52.8211	40.6103	50.0148	32.0644	54.2215	30.0315	34.3202	42.9872	0.365824	0	0	3.55392	22.4253	0	26.0435	2.1535	0.977436	6.80649	14.8168	0.09	0.428657	8.28737	0.910182	0
330808	1985	330808	217810	4.50695e+06	10007.3	1985	1982	1981	1	0	1	0	0	1.5	0	19.6464	0.674127	49.2914	6.8065	17.0736	0.101347	2.09489	37.1728	7.63093	19.3138	54.3004	40.2648	54.3807	32.2099	62.7125	29.5714	27.6071	42.935	0.372969	0	0	3.77756	21.8208	0	26.1807	2.27211	1.05889	7.33643	15.6451	0.105	0.464379	6.58917	0.970194	0
330808	1986	330808	217810	4.50695e+06	10007.3	1986	1989	1991	0	1	0	0	0	0	1.5	19.5623	0.742355	46.7964	7.08904	18.4481	0.0922501	2.02387	33.0526	7.19885	19.4454	55.7796	39.9194	58.7465	32.3554	71.2036	29.1112	20.894	42.8829	0.380114	0	0	4.0012	21.2164	0	26.3179	2.39072	1.14034	7.86636	16.4735	0.15	0.5001	4.89098	1.03021	0
330808	1987	330808	217810	4.50695e+06	10007.3	1987	1989	1991	0	1	0	0	0	0	1.5	19.4781	0.810583	44.3014	7.37158	19.8227	0.0831538	1.95286	28.9325	6.76677	19.577	57.2588	39.5739	63.1124	32.501	79.6947	28.651	14.1809	42.3706	0.434416	0	0	4.1784	21.1335	0	26.8523	2.26925	1.21036	7.72779	16.682	0.148	0.490098	5.35821	0.990912	0
330808	1988	330808	217810	4.50695e+06	10007.3	1988	1989	1991	1	1	0	0	0	0	1.5	19.394	0.87881	41.8064	7.65412	21.1973	0.0740574	1.88184	24.8123	6.33469	19.7086	58.738	39.2285	67.4782	32.6465	88.1858	28.1908	7.46774	41.8583	0.488718	0	0	4.35559	21.0506	0	27.3868	2.14779	1.28038	7.58922	16.8905	0.138	0.480096	5.82545	0.951619	0
330808	1989	330808	217810	4.50695e+06	10007.3	1989	1989	1991	4	2	2	1	1	298.5	1.5	19.3099	0.947038	39.3114	7.93666	22.5718	0.064961	1.81083	20.6922	5.90261	19.8401	60.2172	38.883	71.8441	32.792	96.6769	27.7306	0.754623	41.346	0.54302	0	0	4.53279	20.9677	0	27.9212	2.02632	1.35041	7.45064	17.099	0.137	0.470094	6.29269	0.912325	0
330808	1990	330808	217810	4.50695e+06	10007.3	1990	1989	1991	0	6	0	0	0	0	300	19.2258	1.01527	36.8164	8.21919	23.9464	0.130356	1.74638	21.327	5.75807	21.3905	59.2129	36.9533	71.4255	33.5211	95.9106	31.0701	0.763459	40.8337	0.597322	0	0	4.70998	20.8848	0	28.4557	1.90486	1.42043	7.31207	17.3075	0.136	0.460092	6.75992	0.873032	0
330808	1991	330808	217810	4.50695e+06	10007.3	1991	1989	1991	0	5	0	0	0	0	298.5	19.0074	0.957208	34.1398	13.5237	24.4075	0.195752	1.68193	21.9619	5.61353	22.9409	58.2085	35.0236	71.007	34.2502	95.1443	34.4097	0.772296	40.3214	0.651624	0	0	4.88718	20.802	0	28.9901	1.78339	1.49045	7.17349	17.516	0.134	0.45009	7.22716	0.833738	0
330808	1992	330808	217810	4.50695e+06	10007.3	1992	1989	1991	0	5	0	0	0	0	298.5	18.7889	0.899151	31.4632	18.8282	24.8687	0.261147	1.61748	22.5967	5.46899	24.4913	57.2042	33.0939	70.5885	34.9793	94.3781	37.7493	0.781133	39.8091	0.705926	0	0	5.06438	20.7191	0	29.5246	1.66193	1.56047	7.03492	17.7246	0.133	0.440088	7.6944	0.794445	0
330808	1993	330808	217810	4.50695e+06	10007.3	1993	1989	1991	1	5	0	0	0	0.4	298.5	18.5705	0.841093	28.7866	24.1326	25.3298	0.326542	1.55304	23.2315	5.32445	26.0417	56.1999	31.1641	70.1699	35.7084	93.6118	41.0889	0.789969	39.2968	0.760228	0	0	5.24157	20.6362	0	30.059	1.54046	1.63049	6.89634	17.9331	0.131	0.430086	8.16163	0.755151	0
330808	1994	330808	217810	4.50695e+06	10007.3	1994	1989	1991	0	5	0	0	0	0	298.9	18.352	0.783036	26.11	29.4371	25.7909	0.391938	1.48859	23.8664	5.17991	27.592	55.1955	29.2344	69.7514	36.4376	92.8456	44.4284	0.798805	38.7845	0.81453	0	0	5.41877	20.5533	0	30.5935	1.419	1.70051	6.75777	18.1416	0.13	0.420084	8.62887	0.715857	0
330808	1995	330808	217810	4.50695e+06	10007.3	1995	1989	1991	1	1	1	0	0	8	0.4	18.1336	0.724978	23.4334	34.7416	26.2521	0.457333	1.42414	24.5012	5.03537	29.1424	54.1912	27.3047	69.3329	37.1667	92.0793	47.768	0.807642	38.2722	0.868832	0	0	5.59596	20.4704	0	31.1279	1.29753	1.77053	6.6192	18.3501	0.128	0.410082	9.0961	0.676564	0
330808	1996	330808	217810	4.50695e+06	10007.3	1996	1999	2001	0	2	0	0	0	0	8.4	17.9152	0.66692	20.7568	40.0461	26.7132	0.522728	1.35969	25.136	4.89083	30.6928	53.1868	25.375	68.9143	37.8958	91.313	51.1076	0.816478	37.7599	0.923134	0	0	5.77316	20.3875	0	31.6624	1.17607	1.84055	6.48062	18.5586	0.127	0.40008	9.56334	0.63727	0
330808	1997	330808	217810	4.50695e+06	10007.3	1997	1999	2001	0	2	0	0	0	0	8.4	17.6967	0.608863	18.0802	45.3506	27.1744	0.588124	1.29524	25.7709	4.74628	32.2432	52.1825	23.4453	68.4958	38.6249	90.5468	54.4471	0.825315	37.2476	0.977436	0	0	5.95036	20.3047	0	32.1968	1.0546	1.91057	6.34205	18.7671	0.126	0.390078	10.0306	0.597977	0
330808	1998	330808	217810	4.50695e+06	10007.3	1998	1999	2001	1	2	1	0	0	2	8.4	17.4783	0.550805	15.4036	50.6551	27.6355	0.653519	1.2308	26.4057	4.60174	33.7936	51.1781	21.5155	68.0773	39.354	89.7805	57.7867	0.834152	36.7353	1.03174	0	0	6.12755	20.2218	0	32.7312	0.933137	1.98059	6.20347	18.9757	0.124	0.380076	10.4978	0.558683	0
330808	1999	330808	217810	4.50695e+06	10007.3	1999	1999	2001	1	2	0	0	0	0.06	10	17.2599	0.492748	12.7271	55.9595	28.0966	0.718914	1.16635	27.0406	4.4572	35.344	50.1738	19.5858	67.6588	40.0831	89.0142	61.1263	0.842988	36.223	1.08604	0	0	6.30475	20.1389	0	33.2657	0.811672	2.05062	6.0649	19.1842	0.123	0.370074	10.965	0.51939	0
330808	2000	330808	217810	4.50695e+06	10007.3	2000	1999	2001	1	3	1	0	0	3.5	10.06	17.0414	0.43469	10.0505	61.264	28.5578	1.39823	1.13499	27.3335	4.933	37.0467	50.291	18.2439	66.2117	40.0831	89.0142	60.4366	0.842988	35.7107	1.14034	0	0	6.48194	20.056	0	33.8001	0.690207	2.12064	5.92632	19.3927	0.14	0.360072	11.4323	0.480096	0
330808	2001	330808	217810	4.50695e+06	10007.3	2001	1999	2001	3	3	1	0	0	3.5	5.56	17.0414	0.43469	10.0505	61.264	28.5578	2.07755	1.10363	27.6265	5.40881	38.7494	50.4082	16.9019	64.7646	40.0831	89.0142	59.7469	0.842988	35.5823	1.33873	0	0	6.48194	20.061	0	33.7285	0.68854	2.11897	5.92605	19.3972	0.14	0.30006	9.5269	0.623754	0
330808	2002	330808	217810	4.50695e+06	10007.3	2002	1999	2001	1	6	1	0	0	1.5	9.06	17.0414	0.43469	10.0505	61.264	28.5578	2.75687	1.07227	27.9195	5.88461	40.4521	50.5254	15.56	63.3176	40.0831	89.0142	59.0572	0.842988	35.454	1.53713	0	0	6.48194	20.066	0	33.6568	0.686873	2.1173	5.92577	19.4018	0.14	0.240048	7.62152	0.767413	0
330808	2003	330808	217810	4.50695e+06	10007.3	2003	1999	2001	1	7	0	0	0	0.8	10.56	17.0414	0.43469	10.0505	61.264	28.5578	3.43619	1.04091	28.2125	6.36041	42.1549	50.6426	14.2181	61.8705	40.0831	89.0142	58.3675	0.842988	35.3256	1.73552	0	0	6.48194	20.071	0	33.5851	0.685206	2.11563	5.92549	19.4063	0.14	0.180036	5.71614	0.911071	0
330808	2004	330808	217810	4.50695e+06	10007.3	2004	1999	2001	0	7	0	0	0	0	9.36	17.0414	0.43469	10.0505	61.264	28.5578	4.11551	1.00955	28.5055	6.83621	43.8576	50.7598	12.8761	60.4234	40.0831	89.0142	57.6778	0.842988	35.1972	1.93391	0	0	6.48194	20.076	0	33.5134	0.683538	2.11397	5.92521	19.4109	0.14	0.120024	3.81076	1.05473	0
330808	2005	330808	217810	4.50695e+06	10007.3	2005	1999	2001	3	6	1	0	0	1.75	9.3	17.0414	0.43469	10.0505	61.264	28.5578	4.79483	0.978186	28.7985	7.31201	45.5603	50.877	11.5342	58.9764	40.0831	89.0142	56.9882	0.842988	35.0689	2.13231	0	0	6.48194	20.081	0	33.4417	0.681871	2.1123	5.92493	19.4154	0.14	0.060012	1.90538	1.19839	0
330808	2006	330808	217810	4.50695e+06	10007.3	2006	2009	2001	1	8	0	0	0	0.05	7.55	17.0414	0.43469	10.0505	61.264	28.5578	5.47415	0.946825	29.0914	7.78782	47.2631	50.9942	10.1923	57.5293	40.0831	89.0142	56.2985	0.842988	34.9405	2.3307	0	0	6.48194	20.086	0	33.37	0.680204	2.11063	5.92465	19.42	0.14	0	0	1.34205	0
330808	2007	330808	217810	4.50695e+06	10007.3	2007	2009	2001	0	6	0	0	0	0	4.1	17.0414	0.43469	10.0505	61.264	28.5578	6.15347	0.915465	29.3844	8.26362	48.9658	51.1114	8.85034	56.0822	40.0831	89.0142	55.6088	0.842988	34.9405	2.3307	0	0	6.48194	20.086	0	33.37	0.680204	2.11063	5.92465	19.42	0.14	0	0	1.34205	0
330808	2008	330808	217810	4.50695e+06	10007.3	2008	2009	2001	0	5	0	0	0	0	2.6	17.0414	0.43469	10.0505	61.264	28.5578	7.51211	0.852744	29.9704	9.21522	52.3712	51.3458	6.16647	53.1881	40.0831	89.0142	54.2294	0.842988	34.9405	2.3307	0	0	6.48194	20.086	0	33.37	0.680204	2.11063	5.92465	19.42	0.14	0	0	1.4857	0
330809	1979	330809	217128	4.49697e+06	10006.8	1979	1972	1981	0	3	0	0	0	0	34	3.73832	0.143186	35.5499	10.1902	12.2815	0	1.94345	36.6886	8.53027	15.1117	53.4967	24.8303	54.36	26.0455	54.47	16.9363	30.5758	20.6462	0.070021	4.51635	0.140042	5.12654	30.4341	1.3204	12.4687	19.841	5.39162	12.5311	11.9814	0.008	6.58698	14.4843	0	2.86086
330809	1980	330809	217128	4.49697e+06	10006.8	1980	1982	1981	0	1	0	0	0	0	25	3.53804	0.143186	35.5499	10.1902	12.2815	0	1.86914	38.6008	8.50562	16.3483	53.9415	24.9074	52.5733	26.0455	54.47	16.9363	30.5758	20.5776	0.068592	4.91719	0.120036	5.72457	30.1476	1.37898	11.6864	19.19	6.14327	13.4152	12.2999	0.016	7.16358	12.8367	0	3.23954
330809	1981	330809	217128	4.49697e+06	10006.8	1981	1982	1981	0	1	0	0	0	0	25	3.47498	0.180731	35.9793	10.4073	12.3829	0	1.79483	40.513	8.48097	17.5848	54.3863	24.9845	50.7865	26.0455	54.47	16.9363	30.5758	20.509	0.067163	5.31802	0.10003	6.32261	29.8611	1.43757	10.904	18.5391	6.89493	14.2994	12.6184	0.024	7.74018	11.1891	0	3.61823
330809	1982	330809	217128	4.49697e+06	10006.8	1982	1982	1981	0	1	0	0	0	0	25	3.41191	0.218275	36.4088	10.6245	12.4842	0	1.72052	42.4252	8.45632	18.8214	54.8312	25.0616	48.9998	26.0455	54.47	16.9363	30.5758	20.4404	0.065734	5.71886	0.080024	6.92065	29.5746	1.49616	10.1216	17.8882	7.64658	15.1835	12.9369	0.032	8.31678	9.54143	0	3.99691
330809	1983	330809	217128	4.49697e+06	10006.8	1983	1982	1981	0	1	0	0	0	0	25	3.34884	0.25582	36.8382	10.8416	12.5856	0	1.72921	38.7807	7.70589	18.7055	56.2566	25.5724	53.1468	25.6331	60.6802	16.588	26.3085	20.3718	0.064305	6.11969	0.060018	7.51868	29.2881	1.55475	9.33923	17.2373	8.39823	16.0677	13.2554	0.04	8.89338	7.8938	0	4.3756
330809	1984	330809	217128	4.49697e+06	10006.8	1984	1982	1981	0	0	0	0	0	0	0	3.28578	0.293365	37.2677	11.0587	12.687	0	1.73791	35.1362	6.95545	18.5896	57.6819	26.0832	57.2937	25.2206	66.8904	16.2397	22.0413	20.3032	0.062876	6.52053	0.040012	8.11672	29.0016	1.61334	8.55685	16.5864	9.14989	16.9518	13.5739	0.048	9.46998	6.24616	0	4.75428
330809	1985	330809	217128	4.49697e+06	10006.8	1985	1982	1981	0	0	0	0	0	0	0	3.22271	0.33091	37.6971	11.2758	12.7883	0	1.74661	31.4917	6.20502	18.4737	59.1073	26.594	61.4406	24.8082	73.1006	15.8914	17.774	20.2346	0.061447	6.92136	0.020006	8.71476	28.715	1.67193	7.77448	15.9355	9.90154	17.836	13.8924	0.056	10.0466	4.59852	0	5.13297
330809	1986	330809	217128	4.49697e+06	10006.8	1986	1989	1991	0	0	0	0	0	0	0	3.15965	0.368454	38.1266	11.4929	12.8897	0	1.7553	27.8471	5.45458	18.3578	60.5327	27.1048	65.5876	24.3958	79.3108	15.5431	13.5068	20.166	0.060018	7.3222	0	9.31279	28.4285	1.73052	6.9921	15.2846	10.6532	18.7201	14.2109	0.08	10.6232	2.95088	0	5.51165
330809	1987	330809	217128	4.49697e+06	10006.8	1987	1989	1991	0	0	0	0	0	0	0	3.09658	0.405999	38.556	11.71	12.991	0	1.764	24.2026	4.70415	18.2419	61.9581	27.6156	69.7345	23.9834	85.521	15.1948	9.23953	20.0496	0.055731	6.97352	0	9.36281	28.2549	1.60691	7.64015	14.4636	11.5463	18.2512	14.4742	0.079	9.90511	3.41674	0.0907415	5.81532
330809	1988	330809	217128	4.49697e+06	10006.8	1988	1989	1991	1	0	1	0	0	3	0	3.03352	0.443544	38.9855	11.9271	13.0924	0	1.77269	20.5581	3.95371	18.1261	63.3834	28.1264	73.8815	23.571	91.7312	14.8465	4.97227	19.9331	0.051444	6.62484	0	9.41282	28.0813	1.4833	8.2882	13.6427	12.4394	17.7823	14.7375	0	9.18704	3.88259	0.181483	6.11898
330809	1989	330809	217128	4.49697e+06	10006.8	1989	1989	1991	0	1	0	0	0	0	3	2.97045	0.481088	39.4149	12.1443	13.1938	0	1.78139	16.9135	3.20327	18.0102	64.8088	28.6372	78.0284	23.1585	97.9413	14.4983	0.705021	19.8167	0.047157	6.27617	0	9.46284	27.9077	1.35969	8.93625	12.8217	13.3326	17.3135	15.0008	0	8.46897	4.34845	0.272224	6.42264
330809	1990	330809	217128	4.49697e+06	10006.8	1990	1989	1991	0	1	0	0	0	0	3	2.90738	0.518633	39.8444	12.3614	13.2951	0.0227179	1.72057	17.4269	4.04186	19.3154	64.3055	28.1187	76.8276	22.7152	97.1785	15.1244	0.692882	19.7002	0.04287	5.92749	0	9.51285	27.734	1.23609	9.5843	12.0007	14.2257	16.8446	15.2641	0	7.7509	4.8143	0.362966	6.7263
330809	1991	330809	217128	4.49697e+06	10006.8	1991	1989	1991	0	1	0	0	0	0	3	2.82336	0.494726	37.2119	17.8223	13.9047	0.0454358	1.65975	17.9402	4.88045	20.6205	63.8023	27.6001	75.6269	22.272	96.4156	15.7506	0.680744	19.5837	0.038583	5.57882	0	9.56287	27.5604	1.11248	10.2324	11.1798	15.1188	16.3757	15.5274	0	7.03282	5.28016	0.453707	7.02997
330809	1992	330809	217128	4.49697e+06	10006.8	1992	1989	1991	0	1	0	0	0	0	3	2.73933	0.470819	34.5795	23.2832	14.5143	0.0681537	1.59893	18.4535	5.71904	21.9257	63.299	27.0815	74.4261	21.8287	95.6527	16.3767	0.668605	19.4673	0.034296	5.23014	0	9.61288	27.3868	0.988868	10.8804	10.3588	16.0119	15.9069	15.7907	0	6.31475	5.74601	0.544449	7.33363
330809	1993	330809	217128	4.49697e+06	10006.8	1993	1989	1991	0	1	0	0	0	0	3	2.65531	0.446912	31.9471	28.7441	15.1239	0.0908715	1.53811	18.9668	6.55763	23.2309	62.7957	26.563	73.2253	21.3854	94.8899	17.0029	0.656467	19.3508	0.030009	4.88146	0	9.6629	27.2132	0.865259	11.5285	9.53786	16.9051	15.438	16.054	0	5.59668	6.21186	0.63519	7.63729
330809	1994	330809	217128	4.49697e+06	10006.8	1994	1989	1991	0	0	0	0	0	0	0	2.57128	0.423005	29.3146	34.205	15.7335	0.113589	1.4773	19.4802	7.39622	24.5361	62.2924	26.0444	72.0246	20.9421	94.127	17.629	0.644328	19.2343	0.025722	4.53279	0	9.71291	27.0395	0.741651	12.1765	8.7169	17.7982	14.9691	16.3173	0	4.87861	6.67772	0.725932	7.94095
330809	1995	330809	217128	4.49697e+06	10006.8	1995	1989	1991	0	0	0	0	0	0	0	2.48726	0.399098	26.6822	39.6659	16.343	0.136307	1.41648	19.9935	8.23481	25.8413	61.7891	25.5258	70.8238	20.4988	93.3641	18.2552	0.63219	19.1179	0.021435	4.18411	0	9.76293	26.8659	0.618043	12.8246	7.89594	18.6913	14.5002	16.5806	0	4.16053	7.14357	0.816674	8.24462
330809	1996	330809	217128	4.49697e+06	10006.8	1996	1999	2001	0	0	0	0	0	0	0	2.40323	0.375191	24.0497	45.1268	16.9526	0.159025	1.35566	20.5068	9.0734	27.1465	61.2859	25.0072	69.623	20.0555	92.6013	18.8813	0.620051	19.0014	0.017148	3.83544	0	9.81294	26.6923	0.494434	13.4726	7.07498	19.5844	14.0314	16.8439	0	3.44246	7.60943	0.907415	8.54828
330809	1997	330809	217128	4.49697e+06	10006.8	1997	1999	2001	0	0	0	0	0	0	0	2.3192	0.351284	21.4173	50.5877	17.5622	0.181743	1.29484	21.0201	9.91199	28.4517	60.7826	24.4887	68.4223	19.6122	91.8384	19.5075	0.607913	18.885	0.012861	3.48676	0	9.86296	26.5187	0.370825	14.1207	6.25402	20.4776	13.5625	17.1072	0	2.72439	8.07528	0.998157	8.85194
330809	1998	330809	217128	4.49697e+06	10006.8	1998	1999	2001	0	0	0	0	0	0	0	2.23518	0.327377	18.7849	56.0486	18.1718	0.204461	1.23402	21.5335	10.7506	29.7569	60.2793	23.9701	67.2215	19.169	91.0756	20.1336	0.595774	18.7685	0.008574	3.13808	0	9.91297	26.345	0.247217	14.7687	5.43306	21.3707	13.0936	17.3705	0	2.00632	8.54113	1.0889	9.1556
330809	1999	330809	217128	4.49697e+06	10006.8	1999	1999	2001	0	0	0	0	0	0	0	2.15115	0.30347	16.1524	61.5095	18.7814	0.227179	1.1732	22.0468	11.5892	31.0621	59.776	23.4515	66.0208	18.7257	90.3127	20.7598	0.583636	18.652	0.004287	2.78941	0	9.96299	26.1714	0.123608	15.4168	4.6121	22.2638	12.6248	17.6338	0	1.28824	9.00699	1.17964	9.45927
330809	2000	330809	217128	4.49697e+06	10006.8	2000	1999	2001	0	0	0	0	0	0	0	2.06713	0.279563	13.52	66.9703	19.391	1.22709	1.14996	22.938	11.6379	32.4465	59.7736	21.7783	64.0819	18.7257	90.3127	20.5437	0.583636	18.5356	0	2.44073	0	10.013	25.9978	0	16.0648	3.79114	23.1569	12.1559	17.8971	0	0.570171	9.47284	1.27038	9.76293
330809	2001	330809	217128	4.49697e+06	10006.8	2001	1999	2001	0	0	0	0	0	0	0	2.06713	0.279563	13.52	66.9703	19.391	2.22701	1.12671	23.8292	11.6867	33.8309	59.7711	20.105	62.143	18.7257	90.3127	20.3277	0.583636	18.5272	0	3.76446	0	10.1497	25.5893	0	16.1148	3.53273	22.3217	12.4682	18.0595	0	0.899322	7.91738	1.05865	9.35485
330809	2002	330809	217128	4.49697e+06	10006.8	2002	1999	2001	0	0	0	0	0	0	0	2.06713	0.279563	13.52	66.9703	19.391	3.22692	1.10347	24.7204	11.7355	35.2153	59.7687	18.4317	60.2041	18.7257	90.3127	20.1116	0.583636	18.5189	0	5.08819	0	10.2864	25.1809	0	16.1648	3.27432	21.4864	12.7806	18.2218	0	1.22847	6.36192	0.846921	8.94678
330809	2003	330809	217128	4.49697e+06	10006.8	2003	1999	2001	0	0	0	0	0	0	0	2.06713	0.279563	13.52	66.9703	19.391	4.22684	1.08022	25.6116	11.7843	36.5997	59.7663	16.7584	58.2652	18.7257	90.3127	19.8956	0.583636	18.5106	0	6.41192	0	10.4231	24.7724	0	16.2149	3.0159	20.6512	13.0929	18.3842	0	1.55762	4.80646	0.63519	8.5387
330809	2004	330809	217128	4.49697e+06	10006.8	2004	1999	2001	0	0	0	0	0	0	0	2.06713	0.279563	13.52	66.9703	19.391	5.22675	1.05698	26.5028	11.8331	37.9841	59.7638	15.0851	56.3263	18.7257	90.3127	19.6795	0.583636	18.5022	0	7.73565	0	10.5598	24.364	0	16.2649	2.75749	19.8159	13.4053	18.5465	0	1.88677	3.25099	0.42346	8.13063
330809	2005	330809	217128	4.49697e+06	10006.8	2005	1999	2001	6	0	2	2	0	47.81	0	2.06713	0.279563	13.52	66.9703	19.391	6.22667	1.03373	27.394	11.8819	39.3685	59.7614	13.4118	54.3874	18.7257	90.3127	19.4635	0.583636	18.4939	0	9.05938	0	10.6965	23.9555	0	16.3149	2.49908	18.9807	13.7176	18.7089	0	2.21593	1.69553	0.21173	7.72255
330809	2006	330809	217128	4.49697e+06	10006.8	2006	2009	2001	0	6	0	0	0	0	47.81	2.06713	0.279563	13.52	66.9703	19.391	7.22658	1.01049	28.2851	11.9306	40.7529	59.7589	11.7385	52.4485	18.7257	90.3127	19.2474	0.583636	18.4855	0	10.3831	0	10.8332	23.5471	0	16.3649	2.24067	18.1454	14.0299	18.8712	0	2.54508	0.140071	0	7.31448
330809	2007	330809	217128	4.49697e+06	10006.8	2007	2009	2001	0	6	0	0	0	0	47.81	2.06713	0.279563	13.52	66.9703	19.391	8.22649	0.987245	29.1763	11.9794	42.1373	59.7565	10.0653	50.5096	18.7257	90.3127	19.0314	0.583636	18.4855	0	10.3831	0	10.8332	23.5471	0	16.3649	2.24067	18.1454	14.0299	18.8712	0	2.54508	0.140071	0	7.31448
330809	2008	330809	217128	4.49697e+06	10006.8	2008	2009	2001	1	6	1	0	0	2.26	47.81	2.06713	0.279563	13.52	66.9703	19.391	10.2263	0.940755	30.9587	12.077	44.9061	59.7516	6.71869	46.6318	18.7257	90.3127	18.5992	0.583636	18.4855	0	10.3831	0	10.8332	23.5471	0	16.3649	2.24067	18.1454	14.0299	18.8712	0	2.87423	0	0	6.9064
330810	1979	330810	216448	4486993	10007.2	1979	1972	1981	0	1	0	0	0	0	500	4.63244	0.236179	49.7859	4.95805	6.84583	0.211	2.33867	27.2443	11.177	17.132	47.6054	14.7287	60.772	21.8864	65.3785	10.9883	11.8781	8.53598	0.275193	15.9962	1.72621	4.94346	16.2264	0.675473	9.17142	33.6486	7.83549	12.5499	12.8862	0.187	13.4744	9.11638	0.68548	3.27729
330810	1980	330810	216448	4486993	10007.2	1980	1982	1981	5	1	0	3	2	678	500	4.42939	0.236179	49.7859	4.95805	6.84583	0.242	2.28691	28.2905	9.79886	18.4632	48.149	14.4801	61.2322	21.8864	65.3785	10.9883	11.8781	8.28008	0.277337	14.9662	1.64973	5.31372	15.864	0.7348	8.64176	34.8573	8.44877	12.5903	12.6498	0.204	12.0156	8.13855	0.759103	3.27944
330810	1981	330810	216448	4486993	10007.2	1981	1982	1981	4	6	3	1	0	120	1178	4.3263	0.274728	49.7456	5.03705	7.52401	0.272	2.23515	29.3368	8.4207	19.7944	48.6926	14.2315	61.6924	21.8864	65.3785	10.9883	11.8781	8.02419	0.279481	13.9362	1.57324	5.68398	15.5016	0.794128	8.11211	36.066	9.06206	12.6306	12.4134	0.221	10.5567	7.16073	0.832726	3.28158
330810	1982	330810	216448	4486993	10007.2	1982	1982	1981	2	10	1	1	0	66	1298	4.22322	0.313276	49.7053	5.11605	8.20218	0.302	2.18339	30.383	7.04255	21.1256	49.2362	13.9829	62.1526	21.8864	65.3785	10.9883	11.8781	7.76829	0.281626	12.9062	1.49676	6.05424	15.1392	0.853455	7.58245	37.2747	9.67534	12.671	12.177	0.238	9.0978	6.1829	0.906349	3.28373
330810	1983	330810	216448	4486993	10007.2	1983	1982	1981	1	12	0	1	0	30	1364	4.12013	0.351825	49.665	5.19505	8.88036	0.259	2.25689	26.8745	6.18732	19.8631	50.9002	15.831	66.3186	18.8054	70.0427	10.7708	10.2442	7.5124	0.28377	11.8762	1.42028	6.4245	14.7768	0.912782	7.05279	38.4834	10.2886	12.7113	11.9406	0.255	7.63892	5.20507	0.979972	3.28587
330810	1984	330810	216448	4486993	10007.2	1984	1982	1981	0	12	0	0	0	0	894	4.01704	0.390373	49.6246	5.27405	9.55853	0.215813	2.3304	23.366	5.33208	18.6006	52.5641	17.6791	70.4847	15.7244	74.7069	10.5534	8.61034	7.25651	0.285914	10.8462	1.3438	6.79476	14.4144	0.972109	6.52314	39.6921	10.9019	12.7517	11.7042	0.272	6.18004	4.22724	1.0536	3.28802
330810	1985	330810	216448	4486993	10007.2	1985	1982	1981	12	12	1	4	4	915.1	894	3.91396	0.428922	49.5843	5.35305	10.2367	0.17265	2.4039	19.8575	4.47685	17.338	54.2281	19.5272	74.6508	12.6433	79.3711	10.3359	6.97648	7.00061	0.288059	9.81616	1.26732	7.16502	14.052	1.03144	5.99348	40.9008	11.5152	12.792	11.4678	0.289	4.72116	3.24942	1.12722	3.29016
330810	1986	330810	216448	4486993	10007.2	1986	1989	1991	3	19	2	0	0	8	1131.1	3.81087	0.467471	49.544	5.43205	10.9149	0.129488	2.4774	16.3491	3.62162	16.0755	55.8921	21.3753	78.8168	9.56232	84.0354	10.1185	5.34261	6.74472	0.290203	8.78615	1.19083	7.53528	13.6896	1.09076	5.46382	42.1095	12.1285	12.8323	11.2314	0.34	3.26228	2.27159	1.20084	3.2923
330810	1987	330810	216448	4486993	10007.2	1987	1989	1991	2	18	0	1	0	30.5	1019.1	3.70778	0.506019	49.5037	5.51105	11.5931	0.0863252	2.5509	12.8406	2.76638	14.813	57.556	23.2234	82.9829	6.4813	88.6996	9.90105	3.70874	6.59605	0.269474	8.46879	1.10577	7.31441	13.6295	1.04788	5.63752	41.4933	13.5016	12.7386	11.2234	0.338	3.13291	2.57752	1.13294	4.17006
330810	1988	330810	216448	4486993	10007.2	1988	1989	1991	3	18	1	2	0	46	983.6	3.6047	0.544568	49.4634	5.59005	12.2712	0.0431626	2.62441	9.33205	1.91115	13.5505	59.22	25.0715	87.149	3.40028	93.3638	9.68361	2.07488	6.44737	0.248745	8.15142	1.02071	7.09354	13.5695	1.00499	5.81121	40.8772	14.8747	12.6449	11.2153	0.448	3.00353	2.88345	1.06503	5.04782
330810	1989	330810	216448	4486993	10007.2	1989	1989	1991	4	20	1	1	2	367	999.6	3.50161	0.583116	49.4231	5.66905	12.9494	0	2.69791	5.82355	1.05592	12.2879	60.884	26.9196	91.315	0.319264	98.028	9.46617	0.441012	6.29869	0.228017	7.83406	0.935655	6.87267	13.5095	0.962102	5.9849	40.261	16.2478	12.5511	11.2073	0.447	2.87416	3.18938	0.997127	5.92558
330810	1990	330810	216448	4486993	10007.2	1990	1989	1991	7	24	5	0	0	27.5	1366.6	3.39852	0.621665	49.3828	5.74805	13.6276	0	2.60484	6.71718	1.18424	12.7889	61.6561	26.9867	90.4617	1.29329	97.7398	9.77142	0.427504	6.15002	0.207288	7.51669	0.850596	6.6518	13.4494	0.919215	6.1586	39.6449	17.6209	12.4574	11.1992	0.445	2.74478	3.4953	0.929222	6.80333
330810	1991	330810	216448	4486993	10007.2	1991	1989	1991	17	19	8	4	2	2031.9	479	3.29647	0.579392	47.3482	9.53147	14.9909	0	2.51178	7.61081	1.31257	13.2898	62.4282	27.0538	89.6083	2.26732	97.4515	10.0767	0.413997	6.00134	0.186559	7.19932	0.765536	6.43093	13.3894	0.876328	6.33229	39.0287	18.994	12.3637	11.1912	0.444	2.6154	3.80123	0.861317	7.68109
330810	1992	330810	216448	4486993	10007.2	1992	1989	1991	7	33	3	0	0	13.1	2502.9	3.19442	0.53712	45.3137	13.3149	16.3542	0	2.41871	8.50443	1.44089	13.7908	63.2003	27.1209	88.7549	3.24134	97.1632	10.3819	0.400489	5.85267	0.16583	6.88196	0.680477	6.21006	13.3293	0.833441	6.50598	38.4126	20.3671	12.27	11.1831	0.443	2.48603	4.10716	0.793413	8.55885
330810	1993	330810	216448	4486993	10007.2	1993	1989	1991	1	38	0	0	0	0	2485.5	3.09237	0.494847	43.2791	17.0983	17.7175	0	2.32565	9.39806	1.56922	14.2917	63.9725	27.188	87.9015	4.21537	96.8749	10.6872	0.386982	5.70399	0.145101	6.56459	0.595417	5.98919	13.2693	0.790554	6.67968	37.7965	21.7402	12.1762	11.1751	0.441	2.35665	4.41309	0.725508	9.43661
330810	1994	330810	216448	4486993	10007.2	1994	1989	1991	5	36	2	1	1	207	2439.5	2.99032	0.452575	41.2446	20.8817	19.0808	0	2.23258	10.2917	1.69755	14.7926	64.7446	27.2551	87.0482	5.1894	96.5867	10.9924	0.373474	5.55532	0.124373	6.24723	0.510357	5.76832	13.2092	0.747666	6.85337	37.1803	23.1133	12.0825	11.167	0.44	2.22727	4.71902	0.657603	10.3144
330810	1995	330810	216448	4486993	10007.2	1995	1989	1991	5	37	1	1	1	539.5	2279.5	2.88827	0.410303	39.2101	24.6651	20.4442	0	2.13951	11.1853	1.82587	15.2936	65.5167	27.3222	86.1948	6.16342	96.2984	11.2977	0.359966	5.40664	0.103644	5.92987	0.425298	5.54745	13.1492	0.704779	7.02706	36.5642	24.4864	11.9888	11.159	0.438	2.0979	5.02495	0.589699	11.1921
330810	1996	330810	216448	4486993	10007.2	1996	1999	2001	8	35	3	0	0	15.4	2791.5	2.78622	0.36803	37.1755	28.4486	21.8075	0	2.04645	12.0789	1.9542	15.7945	66.2889	27.3892	85.3414	7.13745	96.0101	11.6029	0.346459	5.25797	0.0829151	5.6125	0.340238	5.32659	13.0892	0.661892	7.20076	35.948	25.8595	11.895	11.1509	0.437	1.96852	5.33087	0.521794	12.0699
330810	1997	330810	216448	4486993	10007.2	1997	1999	2001	7	26	2	0	0	13.4	775	2.68417	0.325757	35.141	32.232	23.1708	0	1.95338	12.9726	2.08252	16.2955	67.061	27.4563	84.488	8.11148	95.7218	11.9082	0.332951	5.10929	0.0621864	5.29514	0.255179	5.10572	13.0291	0.619005	7.37445	35.3319	27.2326	11.8013	11.1429	0.435	1.83914	5.6368	0.453889	12.9476
330810	1998	330810	216448	4486993	10007.2	1998	1999	2001	1	26	0	0	0	0.5	775.3	2.58212	0.283485	33.1064	36.0154	24.5341	0	1.86032	13.8662	2.21085	16.7964	67.8331	27.5234	83.6347	9.0855	95.4336	12.2134	0.319444	4.96061	0.0414576	4.97777	0.170119	4.88485	12.9691	0.576117	7.54814	34.7157	28.6057	11.7076	11.1348	0.434	1.70977	5.94273	0.385984	13.8254
330810	1999	330810	216448	4486993	10007.2	1999	1999	2001	6	26	1	2	0	93.1	775.8	2.48007	0.241212	31.0719	39.7988	25.8974	0	1.76725	14.7598	2.33917	17.2973	68.6052	27.5905	82.7813	10.0595	95.1453	12.5187	0.305936	4.81194	0.0207288	4.6604	0.0850596	4.66398	12.909	0.53323	7.72183	34.0996	29.9788	11.6138	11.1268	0.433	1.58039	6.24866	0.31808	14.7031
330810	2000	330810	216448	4486993	10007.2	2000	1999	2001	3	27	1	0	0	4.08	661.9	2.37802	0.19894	29.0374	43.5822	27.2607	0.361433	1.66498	14.9598	2.88208	18.4078	68.8428	25.0749	81.6785	10.0595	95.1453	12.2436	0.305936	4.66326	0	4.34304	0	4.44311	12.849	0.490343	7.89553	33.4834	31.3519	11.5201	11.1187	0.45	1.45102	6.55459	0.250175	15.5809
330810	2001	330810	216448	4486993	10007.2	2001	1999	2001	2	25	0	0	0	1.5	126.48	2.37802	0.19894	29.0374	43.5822	27.2607	0.722865	1.56271	15.1598	3.42499	19.5182	69.0804	22.5593	80.5757	10.0595	95.1453	11.9684	0.305936	4.6616	0	4.11455	0	4.46646	12.8473	0.492011	7.90053	32.8447	32.2392	11.5168	11.1204	0.45	1.20918	5.46216	0.208479	13.6433
330810	2002	330810	216448	4486993	10007.2	2002	1999	2001	2	19	1	1	0	17.5	112.58	2.37802	0.19894	29.0374	43.5822	27.2607	1.0843	1.46043	15.3598	3.9679	20.6286	69.318	20.0437	79.4729	10.0595	95.1453	11.6933	0.305936	4.65993	0	3.88605	0	4.48981	12.8457	0.493679	7.90553	32.2059	33.1265	11.5134	11.1221	0.45	0.967344	4.36973	0.166783	11.7056
330810	2003	330810	216448	4486993	10007.2	2003	1999	2001	3	14	2	0	0	6.6	116.68	2.37802	0.19894	29.0374	43.5822	27.2607	1.44573	1.35816	15.5598	4.5108	21.7391	69.5555	17.5281	78.3701	10.0595	95.1453	11.4182	0.305936	4.65826	0	3.65756	0	4.51316	12.844	0.495347	7.91054	31.5671	34.0138	11.5101	11.1238	0.45	0.725508	3.27729	0.125088	9.768
330810	2004	330810	216448	4486993	10007.2	2004	1999	2001	2	16	0	0	0	0.25	122.78	2.37802	0.19894	29.0374	43.5822	27.2607	1.80716	1.25589	15.7598	5.05371	22.8495	69.7931	15.0125	77.2673	10.0595	95.1453	11.143	0.305936	4.65659	0	3.42907	0	4.53651	12.8423	0.497014	7.91554	30.9283	34.9011	11.5068	11.1255	0.45	0.483672	2.18486	0.0833917	7.83036
330810	2005	330810	216448	4486993	10007.2	2005	1999	2001	18	12	5	2	1	1128.62	29.93	2.37802	0.19894	29.0374	43.5822	27.2607	2.1686	1.15361	15.9598	5.59662	23.9599	70.0307	12.4969	76.1646	10.0595	95.1453	10.8679	0.305936	4.65492	0	3.20057	0	4.55986	12.8407	0.498682	7.92054	30.2895	35.7884	11.5034	11.1271	0.45	0.241836	1.09243	0.0416958	5.89273
330810	2006	330810	216448	4486993	10007.2	2006	2009	2001	3	27	1	0	0	3.51	1154.47	2.37802	0.19894	29.0374	43.5822	27.2607	2.53003	1.05134	16.1598	6.13953	25.0703	70.2682	9.98131	75.0618	10.0595	95.1453	10.5927	0.305936	4.65326	0	2.97208	0	4.58321	12.839	0.50035	7.92555	29.6508	36.6757	11.5001	11.1288	0.45	0	0	0	3.95509
330810	2007	330810	216448	4486993	10007.2	2007	2009	2001	7	28	0	0	0	0.69	1156.48	2.37802	0.19894	29.0374	43.5822	27.2607	2.89146	0.949068	16.3597	6.68243	26.1808	70.5058	7.46571	73.959	10.0595	95.1453	10.3176	0.305936	4.65326	0	2.97208	0	4.58321	12.839	0.50035	7.92555	29.6508	36.6757	11.5001	11.1288	0.45	0	0	0	3.95509
330810	2008	330810	216448	4486993	10007.2	2008	2009	2001	6	33	2	0	0	8.52	1139.67	2.37802	0.19894	29.0374	43.5822	27.2607	3.61433	0.744523	16.7597	7.76825	28.4016	70.981	2.43452	71.7534	10.0595	95.1453	9.76734	0.305936	4.65326	0	2.97208	0	4.58321	12.839	0.50035	7.92555	29.6508	36.6757	11.5001	11.1288	0.45	0	0	0	2.01745
330811	1979	330811	215768	4.47701e+06	10007.3	1979	1972	1981	3	5	3	0	0	7.5	32.7	12.758	0.725524	62.3754	4.22164	3.88046	0.35	3.99742	24.7494	24.4414	1.80092	37.0176	72.594	50.3152	65.2138	83.8008	5.56018	0.997572	0	0.02002	55.6557	2.68769	1.57157	0.870871	7.13213	0.015015	24.5996	4.33433	3.18627	0.00572454	0.41	37.1471	2.26727	1.54154	1.0961
330811	1980	330811	215768	4.47701e+06	10007.3	1980	1982	1981	2	8	1	0	0	4.5	40.2	12.4141	0.725524	62.3754	4.22164	3.88046	0.233	3.98938	27.9947	16.7542	1.88708	36.4597	72.2235	54.8817	65.2138	83.8008	5.56018	0.997572	0	0.02288	53.4978	2.56113	1.79608	0.835121	8.15101	0.01716	25.2252	4.77906	3.04857	0.00490675	0.41	32.687	2.00915	1.76176	1.20263
330811	1981	330811	215768	4.47701e+06	10007.3	1981	1982	1981	0	9	0	0	0	0	44.2	12.1849	0.789202	60.925	4.39104	5.19499	0.117	3.98134	31.2399	9.0669	1.97323	35.9018	71.8531	59.4481	65.2138	83.8008	5.56018	0.997572	0	0.02574	51.3399	2.43458	2.02059	0.799371	9.16988	0.019305	25.8509	5.22379	2.91088	0.00408896	0.41	28.2268	1.75104	1.98198	1.30917
330811	1982	330811	215768	4.47701e+06	10007.3	1982	1982	1981	3	9	1	0	0	2.5	44.2	11.9557	0.85288	59.4746	4.56044	6.50952	0	3.97331	34.4851	1.37963	2.05938	35.3439	71.4827	64.0146	65.2138	83.8008	5.56018	0.997572	0	0.0286	49.182	2.30802	2.2451	0.763621	10.1888	0.02145	26.4765	5.66853	2.77318	0.00327116	0.41	23.7666	1.49292	2.2022	1.4157
330811	1983	330811	215768	4.47701e+06	10007.3	1983	1982	1981	4	11	1	1	0	83	46.5	11.7265	0.916558	58.0243	4.72984	7.82405	0.014	4.06392	29.7539	1.22328	2.02858	34.8379	72.7734	68.7816	56.0047	85.924	5.32377	0.863562	0	0.03146	47.0242	2.18147	2.46961	0.727871	11.2076	0.023595	27.1021	6.11326	2.63549	0.00245337	0.41	19.3064	1.23481	2.42242	1.52224
330811	1984	330811	215768	4.47701e+06	10007.3	1984	1982	1981	1	12	1	0	0	8	97.5	11.4973	0.980236	56.5739	4.89924	9.13858	0.0284195	4.15454	25.0227	1.06693	1.99778	34.332	74.064	73.5485	46.7956	88.0472	5.08737	0.729552	0	0.03432	44.8663	2.05491	2.69412	0.692121	12.2265	0.02574	27.7277	6.55799	2.4978	0.00163558	0.41	14.8463	0.976691	2.64264	1.62877
330811	1985	330811	215768	4.47701e+06	10007.3	1985	1982	1981	2	10	1	0	0	2.5	98	11.2681	1.04391	55.1236	5.06864	10.4531	0.0426292	4.24516	20.2915	0.910575	1.96698	33.8261	75.3547	78.3154	37.5865	90.1704	4.85096	0.595542	0	0.03718	42.7084	1.92836	2.91863	0.656371	13.2454	0.027885	28.3534	7.00272	2.3601	0.000817791	0.41	10.3861	0.718575	2.86286	1.73531
330811	1986	330811	215768	4.47701e+06	10007.3	1986	1989	1991	7	10	2	1	3	3553.5	96	11.0389	1.10759	53.6732	5.23804	11.7676	0.0568389	4.33577	15.5603	0.754223	1.93617	33.3201	76.6454	83.0824	28.3774	92.2936	4.61456	0.461531	0	0.04004	40.5506	1.8018	3.14314	0.620621	14.2643	0.03003	28.979	7.44745	2.22241	0	0.41	5.92593	0.46046	3.08308	1.84184
330811	1987	330811	215768	4.47701e+06	10007.3	1987	1989	1991	1	17	0	0	0	1	3649.5	10.8097	1.17127	52.2229	5.40744	13.0822	0.0710487	4.42639	10.829	0.597871	1.90537	32.8142	77.9361	87.8493	19.1683	94.4168	4.37815	0.327521	0	0.03718	40.5062	1.6731	2.91863	0.835836	13.3541	0.052195	28.9997	8.69727	2.34577	0.024268	0.408	5.88517	0.62205	2.88646	2.28157
330811	1988	330811	215768	4.47701e+06	10007.3	1988	1989	1991	0	15	0	0	0	0	3648	10.5805	1.23495	50.7725	5.57684	14.3967	0.0852584	4.517	6.09783	0.441519	1.87457	32.3083	79.2267	92.6162	9.95925	96.5401	4.14174	0.193511	0	0.03432	40.4619	1.5444	2.69412	1.05105	12.4439	0.07436	29.0204	9.94709	2.46914	0.048536	0.378	5.84442	0.78364	2.68983	2.72129
330811	1989	330811	215768	4.47701e+06	10007.3	1989	1989	1991	9	11	1	0	2	877.6	3565	10.3513	1.29863	49.3222	5.74624	15.7112	0.0994681	4.60762	1.36661	0.285167	1.84377	31.8024	80.5174	97.3832	0.750148	98.6633	3.90534	0.059501	0	0.03146	40.4176	1.4157	2.46961	1.26627	11.5337	0.096525	29.0412	11.1969	2.5925	0.072804	0.377	5.80366	0.945231	2.49321	3.16102
330811	1990	330811	215768	4.47701e+06	10007.3	1990	1989	1991	12	19	2	2	0	28	4434.6	10.1221	1.3623	47.8718	5.91564	17.0258	0.0895213	4.3337	1.63345	0.295434	1.97367	32.9023	80.0013	97.1905	1.19659	98.4968	3.78607	0.0652826	0	0.0286	40.3732	1.287	2.2451	1.48148	10.6235	0.11869	29.0619	12.4467	2.71586	0.097072	0.375	5.76291	1.10682	2.29658	3.60074
330811	1991	330811	215768	4.47701e+06	10007.3	1991	1989	1991	2	29	0	0	0	1.2	4460.1	9.96269	1.27955	43.8444	12.2672	17.6082	0.0795745	4.05978	1.90028	0.305701	2.10357	34.0022	79.4852	96.9979	1.64304	98.3303	3.6668	0.0710642	0	0.02574	40.3289	1.1583	2.02059	1.6967	9.71328	0.140855	29.0827	13.6966	2.83923	0.12134	0.374	5.72215	1.26841	2.09996	4.04047
330811	1992	330811	215768	4.47701e+06	10007.3	1992	1989	1991	0	24	0	0	0	0	907.8	9.80325	1.1968	39.8169	18.6189	18.1907	0.0696277	3.78586	2.16711	0.315968	2.23347	35.1021	78.9691	96.8052	2.08948	98.1638	3.54753	0.0768458	0	0.02288	40.2846	1.0296	1.79608	1.91191	8.80309	0.16302	29.1034	14.9464	2.96259	0.145608	0.373	5.6814	1.43	1.90333	4.48019
330811	1993	330811	215768	4.47701e+06	10007.3	1993	1989	1991	0	23	0	0	0	0	906.8	9.6438	1.11405	35.7895	24.9705	18.7732	0.0596809	3.51193	2.43394	0.326235	2.36337	36.2021	78.453	96.6126	2.53592	97.9974	3.42826	0.0826274	0	0.02002	40.2402	0.900901	1.57157	2.12713	7.89289	0.185185	29.1241	16.1962	3.08596	0.169876	0.371	5.64064	1.59159	1.70671	4.91992
330811	1994	330811	215768	4.47701e+06	10007.3	1994	1989	1991	0	23	0	0	0	0	906.8	9.48436	1.0313	31.762	31.3221	19.3556	0.0497341	3.23801	2.70078	0.336502	2.49327	37.302	77.9369	96.4199	2.98237	97.8309	3.30898	0.088409	0	0.01716	40.1959	0.772201	1.34706	2.34234	6.9827	0.20735	29.1449	17.446	3.20932	0.194144	0.37	5.59989	1.75318	1.51008	5.35965
330811	1995	330811	215768	4.47701e+06	10007.3	1995	1989	1991	0	14	0	0	0	0	29.2	9.32492	0.948554	27.7345	37.6737	19.9381	0.0397873	2.96409	2.96761	0.346769	2.62317	38.4019	77.4208	96.2272	3.42881	97.6644	3.18971	0.0941906	0	0.0143	40.1516	0.643501	1.12255	2.55756	6.0725	0.229515	29.1656	18.6958	3.33269	0.218412	0.368	5.55913	1.91477	1.31346	5.79937
330811	1996	330811	215768	4.47701e+06	10007.3	1996	1999	2001	0	2	0	0	0	0	1.2	9.16548	0.865804	23.7071	44.0253	20.5206	0.0298404	2.69017	3.23444	0.357036	2.75307	39.5018	76.9047	96.0346	3.87525	97.498	3.07044	0.0999722	0	0.01144	40.1073	0.514801	0.898041	2.77277	5.16231	0.25168	29.1863	19.9457	3.45605	0.24268	0.367	5.51838	2.07636	1.11683	6.2391
330811	1997	330811	215768	4.47701e+06	10007.3	1997	1999	2001	0	0	0	0	0	0	0	9.00604	0.783054	19.6796	50.3769	21.103	0.0198936	2.41625	3.50127	0.367303	2.88298	40.6017	76.3886	95.8419	4.3217	97.3315	2.95117	0.105754	0	0.00858	40.0629	0.3861	0.673531	2.98799	4.25211	0.273845	29.2071	21.1955	3.57941	0.266948	0.365	5.47762	2.23795	0.920206	6.67882
330811	1998	330811	215768	4.47701e+06	10007.3	1998	1999	2001	0	0	0	0	0	0	0	8.84659	0.700304	15.6522	56.7285	21.6855	0.00994681	2.14233	3.7681	0.37757	3.01288	41.7017	75.8725	95.6493	4.76814	97.165	2.8319	0.111535	0	0.00572	40.0186	0.2574	0.44902	3.2032	3.34191	0.29601	29.2278	22.4453	3.70278	0.291216	0.364	5.43687	2.39954	0.72358	7.11855
330811	1999	330811	215768	4.47701e+06	10007.3	1999	1999	2001	0	0	0	0	0	0	0	8.68715	0.617554	11.6247	63.0801	22.268	0	1.86841	4.03494	0.387837	3.14278	42.8016	75.3564	95.4566	5.21459	96.9985	2.71263	0.117317	0	0.00286	39.9743	0.1287	0.22451	3.41842	2.43172	0.318175	29.2485	23.6951	3.82614	0.315484	0.363	5.39611	2.56113	0.526955	7.55827
330811	2000	330811	215768	4.47701e+06	10007.3	2000	1999	2001	0	0	0	0	0	0	0	8.52771	0.534804	7.59724	69.4317	22.8504	0.22379	1.74217	5.22009	0.760859	4.64773	44.8782	68.0973	93.6761	5.21459	96.9985	2.57718	0.117317	0	0	39.9299	0	0	3.63363	1.52152	0.34034	29.2693	24.9449	3.94951	0.339752	0.38	5.35536	2.72272	0.33033	7.998
330811	2001	330811	215768	4.47701e+06	10007.3	2001	1999	2001	0	0	0	0	0	0	0	8.52771	0.534804	7.59724	69.4317	22.8504	0.44758	1.61593	6.40524	1.13388	6.15268	46.9548	60.8382	91.8955	5.21459	96.9985	2.44172	0.117317	0	0	34.6563	0	0	3.63363	1.26794	0.333667	27.6293	32.1188	3.94951	0.33309	0.38	4.4628	2.26894	0.275275	8.30461
330811	2002	330811	215768	4.47701e+06	10007.3	2002	1999	2001	0	0	0	0	0	0	0	8.52771	0.534804	7.59724	69.4317	22.8504	0.67137	1.4897	7.59039	1.5069	7.65763	49.0313	53.5791	90.1149	5.21459	96.9985	2.30626	0.117317	0	0	29.3827	0	0	3.63363	1.01435	0.326993	25.9893	39.2926	3.94951	0.326428	0.38	3.57024	1.81515	0.22022	8.61121
330811	2003	330811	215768	4.47701e+06	10007.3	2003	1999	2001	0	0	0	0	0	0	0	8.52771	0.534804	7.59724	69.4317	22.8504	0.89516	1.36346	8.77554	1.87992	9.16258	51.1079	46.32	88.3343	5.21459	96.9985	2.17081	0.117317	0	0	24.1091	0	0	3.63363	0.760761	0.32032	24.3493	46.4665	3.94951	0.319767	0.38	2.67768	1.36136	0.165165	8.91782
330811	2004	330811	215768	4.47701e+06	10007.3	2004	1999	2001	0	0	0	0	0	0	0	8.52771	0.534804	7.59724	69.4317	22.8504	1.11895	1.23722	9.9607	2.25295	10.6675	53.1845	39.0609	86.5537	5.21459	96.9985	2.03535	0.117317	0	0	18.8355	0	0	3.63363	0.507174	0.313647	22.7094	53.6403	3.94951	0.313105	0.38	1.78512	0.907574	0.11011	9.22443
330811	2005	330811	215768	4.47701e+06	10007.3	2005	1999	2001	0	0	0	0	0	0	0	8.52771	0.534804	7.59724	69.4317	22.8504	1.34274	1.11099	11.1458	2.62597	12.1725	55.2611	31.8018	84.7732	5.21459	96.9985	1.89989	0.117317	0	0	13.5619	0	0	3.63363	0.253587	0.306973	21.0694	60.8141	3.94951	0.306443	0.38	0.892559	0.453787	0.055055	9.53104
330811	2006	330811	215768	4.47701e+06	10007.3	2006	2009	2001	0	0	0	0	0	0	0	8.52771	0.534804	7.59724	69.4317	22.8504	1.56653	0.984752	12.331	2.99899	13.6774	57.3377	24.5427	82.9926	5.21459	96.9985	1.76444	0.117317	0	0	8.28829	0	0	3.63363	0	0.3003	19.4294	67.988	3.94951	0.299781	0.38	0	0	0	9.83765
330811	2007	330811	215768	4.47701e+06	10007.3	2007	2009	2001	1	0	0	0	0	0.3	0	8.52771	0.534804	7.59724	69.4317	22.8504	1.79032	0.858516	13.5162	3.37201	15.1824	59.4143	17.2836	81.212	5.21459	96.9985	1.62898	0.117317	0	0	8.28829	0	0	3.63363	0	0.3003	19.4294	67.988	3.94951	0.299781	0.38	0	0	0	9.83765
330811	2008	330811	215768	4.47701e+06	10007.3	2008	2009	2001	1	1	0	0	0	0.8	0.3	8.52771	0.534804	7.59724	69.4317	22.8504	2.2379	0.606044	15.8865	4.11805	18.1923	63.5675	2.76534	77.6509	5.21459	96.9985	1.35807	0.117317	0	0	8.28829	0	0	3.63363	0	0.3003	19.4294	67.988	3.94951	0.299781	0.38	0	0	0	10.1443
330812	1979	330812	215090	4.46703e+06	10008.3	1979	1972	1981	0	3	0	0	0	0	2.1	10.676	0.414646	67.5445	3.07058	4.63171	0.063	4.33929	28.3436	26.8979	1.59826	35.0528	76.3414	44.3541	69.3528	72.8641	4.19037	2.1867	0.730292	0.2501	49.5248	17.3319	1.38555	0.740296	1.72569	0.045018	26.2755	1.94578	14.8567	0.321592	0.972	37.9502	11.3095	0.185074	0
330812	1980	330812	215090	4.46703e+06	10008.3	1980	1982	1981	6	3	2	1	2	1116	2.1	10.3206	0.414646	67.5445	3.07058	4.63171	0.042	4.3515	32.3229	20.5293	1.59742	33.6388	76.0837	46.8377	69.3528	72.8641	4.19037	2.1867	0.711713	0.265821	46.763	17.4798	1.44058	0.746013	1.97222	0.0514491	28.5986	1.9222	14.8718	0.346943	0.975	33.2019	10.6114	0.190076	0
330812	1981	330812	215090	4.46703e+06	10008.3	1981	1982	1981	14	9	3	2	1	288	1118.1	10.1614	0.525175	67.1146	3.10932	5.18318	0.021	4.36371	36.3022	14.1607	1.59659	32.2248	75.826	49.3212	69.3528	72.8641	4.19037	2.1867	0.693134	0.281541	44.0012	17.6278	1.4956	0.751729	2.21874	0.0578803	30.9217	1.89862	14.8869	0.372294	0.978	28.4535	9.91325	0.195078	0
330812	1982	330812	215090	4.46703e+06	10008.3	1982	1982	1981	6	21	2	0	0	4.9	1405	10.0021	0.635704	66.6847	3.14807	5.73465	0	4.37593	40.2814	7.79209	1.59575	30.8108	75.5684	51.8048	69.3528	72.8641	4.19037	2.1867	0.674555	0.297262	41.2394	17.7757	1.55062	0.757446	2.46527	0.0643114	33.2447	1.87504	14.9021	0.397645	0.981	23.7052	9.21511	0.20008	0
330812	1983	330812	215090	4.46703e+06	10008.3	1983	1982	1981	8	27	5	2	0	109.5	1409.9	9.8429	0.746233	66.2549	3.18682	6.28612	0.018	4.46684	34.5853	6.71878	1.60606	30.3167	76.673	58.4532	59.6219	76.5609	4.18022	1.93505	0.655977	0.312982	38.4775	17.9236	1.60564	0.763162	2.7118	0.0707426	35.5678	1.85145	14.9172	0.422996	0.984	18.9569	8.51698	0.205082	0
330812	1984	330812	215090	4.46703e+06	10008.3	1984	1982	1981	7	34	4	0	0	12.6	1518.4	9.68367	0.856762	65.825	3.22556	6.83759	0.0365996	4.55776	28.8892	5.64547	1.61636	29.8227	77.7777	65.1016	49.8911	80.2577	4.17007	1.6834	0.637398	0.328703	35.7157	18.0715	1.66066	0.768879	2.95833	0.0771737	37.8909	1.82787	14.9323	0.448347	0.987	14.2085	7.81884	0.210084	0
330812	1985	330812	215090	4.46703e+06	10008.3	1985	1982	1981	23	41	5	8	3	954.2	1531	9.52443	0.967291	65.3951	3.26431	7.38905	0.0548995	4.64868	23.1931	4.57216	1.62666	29.3286	78.8823	71.75	40.1602	83.9545	4.15993	1.43174	0.618819	0.344423	32.9539	18.2194	1.71569	0.774595	3.20485	0.0836049	40.2139	1.80429	14.9475	0.473698	0.99	9.46021	7.12071	0.215086	0
330812	1986	330812	215090	4.46703e+06	10008.3	1986	1989	1991	10	58	3	3	2	1219	1369.2	9.3652	1.07782	64.9652	3.30306	7.94052	0.0731993	4.73959	17.497	3.49885	1.63697	28.8345	79.9869	78.3984	30.4294	87.6513	4.14978	1.18009	0.60024	0.360144	30.1921	18.3673	1.77071	0.780312	3.45138	0.090036	42.537	1.78071	14.9626	0.499049	0.999	4.71188	6.42257	0.220088	0
330812	1987	330812	215090	4.46703e+06	10008.3	1987	1989	1991	8	54	1	2	0	33.2	2300.2	9.20596	1.18835	64.5353	3.3418	8.49199	0.0914991	4.83051	11.8009	2.42554	1.64727	28.3405	81.0916	85.0468	20.6986	91.3482	4.13964	0.92844	0.557366	0.334419	30.3421	18.0372	1.66638	1.01255	3.20485	0.0836049	40.9957	3.56428	15.0417	0.463403	0.998	5.12562	6.33682	0.204367	1.31696
330812	1988	330812	215090	4.46703e+06	10008.3	1988	1989	1991	6	56	0	3	0	83	2328.5	9.04673	1.29888	64.1055	3.38055	9.04346	0.109799	4.92142	6.10477	1.35223	1.65757	27.8464	82.1962	91.6952	10.9677	95.045	4.12949	0.676788	0.514491	0.308695	30.4922	17.7071	1.56205	1.24478	2.95833	0.0771737	39.4544	5.34785	15.1207	0.427756	0.908	5.53936	6.25107	0.188647	2.63391
330812	1989	330812	215090	4.46703e+06	10008.3	1989	1989	1991	9	54	3	2	1	513.2	2302	8.88749	1.40941	63.6756	3.4193	9.59493	0.128099	5.01234	0.408657	0.278918	1.66788	27.3524	83.3009	98.3436	1.23687	98.7418	4.11934	0.425136	0.471617	0.28297	30.6423	17.377	1.45773	1.47702	2.7118	0.0707426	37.913	7.13142	15.1998	0.39211	0.906	5.9531	6.16532	0.172926	3.95087
330812	1990	330812	215090	4.46703e+06	10008.3	1990	1989	1991	12	56	2	3	0	125.4	2802.6	8.72826	1.51994	63.2457	3.45804	10.1464	0.115289	4.87679	0.455645	0.285541	1.68587	28.7374	82.4466	98.3747	1.54681	98.67	3.96035	0.460662	0.428743	0.257246	30.7923	17.0468	1.3534	1.70926	2.46527	0.0643114	36.3717	8.91499	15.2789	0.356463	0.905	6.36683	6.07957	0.157206	5.26782
330812	1991	330812	215090	4.46703e+06	10008.3	1991	1989	1991	15	45	3	3	1	610.3	1973.8	8.6459	1.42053	58.8762	8.63182	11.645	0.102479	4.74125	0.502633	0.292164	1.70387	30.1225	81.5923	98.4058	1.85675	98.5983	3.80135	0.496187	0.385869	0.231521	30.9424	16.7167	1.24907	1.94149	2.21874	0.0578803	34.8304	10.6986	15.3579	0.320817	0.904	6.78057	5.99383	0.141485	6.58478
330812	1992	330812	215090	4.46703e+06	10008.3	1992	1989	1991	6	50	0	2	0	102	1365.1	8.56354	1.32112	54.5067	13.8056	13.1435	0.0896691	4.6057	0.549621	0.298787	1.72187	31.5076	80.738	98.4369	2.16669	98.5265	3.64235	0.531713	0.342994	0.205797	31.0924	16.3866	1.14474	2.17373	1.97222	0.0514491	33.289	12.4821	15.437	0.285171	0.902	7.19431	5.90808	0.125765	7.90173
330812	1993	330812	215090	4.46703e+06	10008.3	1993	1989	1991	7	48	1	0	0	2.8	1433.9	8.48118	1.22172	50.1371	18.9794	14.6421	0.0768593	4.47016	0.596608	0.30541	1.73987	32.8927	79.8837	98.468	2.47662	98.4547	3.48336	0.567238	0.30012	0.180072	31.2425	16.0564	1.04042	2.40596	1.72569	0.045018	31.7477	14.2657	15.5161	0.249524	0.901	7.60804	5.82233	0.110044	9.21869
330812	1994	330812	215090	4.46703e+06	10008.3	1994	1989	1991	14	49	6	1	0	32.4	1353.7	8.39882	1.12231	45.7676	24.1531	16.1407	0.0640494	4.33461	0.643596	0.312034	1.75787	34.2778	79.0293	98.4991	2.78656	98.383	3.32436	0.602764	0.257246	0.154347	31.3926	15.7263	0.936089	2.6382	1.47916	0.0385869	30.2064	16.0493	15.5951	0.213878	0.899	8.02178	5.73658	0.0943234	10.5356
330812	1995	330812	215090	4.46703e+06	10008.3	1995	1989	1991	25	54	8	2	0	96.7	872.9	8.31647	1.02291	41.3981	29.3269	17.6393	0.0512395	4.19906	0.690584	0.318657	1.77587	35.6629	78.175	98.5302	3.0965	98.3112	3.16536	0.638289	0.214371	0.128623	31.5426	15.3962	0.831761	2.87043	1.23264	0.0321557	28.665	17.8328	15.6742	0.178232	0.898	8.43552	5.65083	0.0786029	11.8526
330812	1996	330812	215090	4.46703e+06	10008.3	1996	1999	2001	15	67	3	0	0	13.9	844.2	8.23411	0.923502	37.0286	34.5007	19.1378	0.0384296	4.06352	0.737572	0.32528	1.79387	37.048	77.3207	98.5613	3.40644	98.2395	3.00637	0.673814	0.171497	0.102898	31.6927	15.066	0.727434	3.10267	0.986109	0.0257246	27.1237	19.6164	15.7533	0.142585	0.896	8.84925	5.56508	0.0628823	13.1696
330812	1997	330812	215090	4.46703e+06	10008.3	1997	1999	2001	6	67	1	2	0	96.3	247.8	8.15175	0.824097	32.6591	39.6745	20.6364	0.0256198	3.92797	0.78456	0.331903	1.81186	38.4331	76.4664	98.5924	3.71638	98.1677	2.84737	0.70934	0.128623	0.0771737	31.8427	14.7359	0.623106	3.33491	0.739582	0.0192934	25.5824	21.4	15.8323	0.106939	0.895	9.26299	5.47933	0.0471617	14.4865
330812	1998	330812	215090	4.46703e+06	10008.3	1998	1999	2001	3	67	1	0	0	2.07	242.1	8.06939	0.724691	28.2895	44.8482	22.135	0.0128099	3.79242	0.831548	0.338526	1.82986	39.8182	75.6121	98.6235	4.02632	98.0959	2.68837	0.744865	0.0857486	0.0514491	31.9928	14.4058	0.518779	3.56714	0.493054	0.0128623	24.041	23.1836	15.9114	0.0712927	0.894	9.67673	5.39359	0.0314411	15.8035
330812	1999	330812	215090	4.46703e+06	10008.3	1999	1999	2001	11	63	3	0	0	9.93	241.37	7.98704	0.625286	23.92	50.022	23.6335	0	3.65688	0.878536	0.345149	1.84786	41.2033	74.7578	98.6546	4.33626	98.0242	2.52938	0.780391	0.0428743	0.0257246	32.1429	14.0756	0.414451	3.79938	0.246527	0.00643114	22.4997	24.9671	15.9905	0.0356463	0.892	10.0905	5.30784	0.0157206	17.1204
330812	2000	330812	215090	4.46703e+06	10008.3	2000	1999	2001	21	60	3	4	3	776.55	218.9	7.90468	0.52588	19.5505	55.1958	25.1321	0.69369	3.69932	1.08726	0.443908	2.01136	42.7939	67.3405	97.6537	4.33626	98.0242	2.74345	0.780391	0	0	32.2929	13.7455	0.310124	4.03161	0	0	20.9584	26.7507	16.0696	0	0.909	10.5042	5.22209	0	18.4374
330812	2001	330812	215090	4.46703e+06	10008.3	2001	1999	2001	15	56	2	1	0	103.47	898.75	7.90468	0.52588	19.5505	55.1958	25.1321	1.38738	3.74176	1.29599	0.542666	2.17486	44.3844	59.9232	96.6528	4.33626	98.0242	2.95752	0.780391	0	0.0433507	27.581	12.4466	0.310124	4.09831	0	0	21.3102	32.3413	15.3136	0	0.909	8.7535	4.50347	0.105041	16.3346
330812	2002	330812	215090	4.46703e+06	10008.3	2002	1999	2001	10	56	1	1	1	181.31	988.32	7.90468	0.52588	19.5505	55.1958	25.1321	2.08107	3.7842	1.50471	0.641424	2.33835	45.975	52.5059	95.652	4.33626	98.0242	3.17159	0.780391	0	0.0867013	22.8691	11.1478	0.310124	4.165	0	0	21.662	37.9318	14.5576	0	0.909	7.0028	3.78484	0.210081	14.2318
330812	2003	330812	215090	4.46703e+06	10008.3	2003	1999	2001	10	60	2	0	2	6504.77	1073.33	7.90468	0.52588	19.5505	55.1958	25.1321	2.77476	3.82664	1.71344	0.740182	2.50185	47.5656	45.0887	94.6511	4.33626	98.0242	3.38566	0.780391	0	0.130052	18.1573	9.84894	0.310124	4.23169	0	0	22.0138	43.5224	13.8016	0	0.909	5.2521	3.06622	0.315122	12.129
330812	2004	330812	215090	4.46703e+06	10008.3	2004	1999	2001	6	67	1	0	0	3.6	7576.03	7.90468	0.52588	19.5505	55.1958	25.1321	3.46845	3.86908	1.92217	0.838941	2.66535	49.1562	37.6714	93.6502	4.33626	98.0242	3.59974	0.780391	0	0.173403	13.4454	8.55009	0.310124	4.29839	0	0	22.3656	49.113	13.0456	0	0.909	3.5014	2.3476	0.420162	10.0262
330812	2005	330812	215090	4.46703e+06	10008.3	2005	1999	2001	3	62	2	0	0	5.1	7569.7	7.90468	0.52588	19.5505	55.1958	25.1321	4.16214	3.91152	2.13089	0.937699	2.82884	50.7468	30.2541	92.6493	4.33626	98.0242	3.81381	0.780391	0	0.216753	8.73349	7.25123	0.310124	4.36508	0	0	22.7174	54.7035	12.2897	0	0.909	1.7507	1.62897	0.525203	7.92346
330812	2006	330812	215090	4.46703e+06	10008.3	2006	2009	2001	3	44	1	0	0	2.07	6798.25	7.90468	0.52588	19.5505	55.1958	25.1321	4.85583	3.95396	2.33962	1.03646	2.99234	52.3374	22.8368	91.6484	4.33626	98.0242	4.02788	0.780391	0	0.260104	4.02161	5.95238	0.310124	4.43177	0	0	23.0692	60.2941	11.5337	0	0.909	0	0.910352	0.630244	5.82067
330812	2007	330812	215090	4.46703e+06	10008.3	2007	2009	2001	3	32	0	0	0	0.22	6696.85	7.90468	0.52588	19.5505	55.1958	25.1321	5.54952	3.9964	2.54835	1.13522	3.15584	53.9279	15.4195	90.6475	4.33626	98.0242	4.24195	0.780391	0	0.260104	4.02161	5.95238	0.310124	4.43177	0	0	23.0692	60.2941	11.5337	0	0.909	0	0.910352	0.630244	5.82067
330812	2008	330812	215090	4.46703e+06	10008.3	2008	2009	2001	0	25	0	0	0	0	6515.76	7.90468	0.52588	19.5505	55.1958	25.1321	6.9369	4.08128	2.9658	1.33273	3.48283	57.1091	0.584934	88.6458	4.33626	98.0242	4.6701	0.780391	0	0.260104	4.02161	5.95238	0.310124	4.43177	0	0	23.0692	60.2941	11.5337	0	0.909	0	0.191729	0.735284	3.71789
330813	1979	330813	214413	4.45705e+06	10007.2	1979	1972	1981	0	4	0	0	0	0	386.6	9.013	0.40652	68.4186	4.80358	8.02419	0.535	4.06244	21.7772	6.95384	7.04626	47.0741	43.9142	70.7581	69.485	57.8162	9.92504	0.969623	21.2985	0.245098	15.6413	18.5974	7.9932	11.2445	2.52101	1.10544	17.1469	4.17167	16.1984	6.37612	0.118	15.8814	18.5974	0.10004	0.655262
330813	1980	330813	214413	4.45705e+06	10007.2	1980	1982	1981	7	3	2	2	1	215.5	61.6	8.68946	0.40652	68.4186	4.80358	8.02419	0.357	4.05607	24.346	5.38484	7.07978	47.2954	44.3032	69.8877	69.485	57.8162	9.92504	0.969623	21.157	0.244383	14.1714	18.8433	8.10896	10.5028	2.85686	1.19619	18.8418	4.03733	16.1032	6.95562	0.136	13.9542	17.3126	0.0928943	0.743154
330813	1981	330813	214413	4.45705e+06	10007.2	1981	1982	1981	1	9	0	0	1	1460	216.6	8.52544	0.482905	68.8931	4.70688	7.74692	0.178	4.04971	26.9148	3.81585	7.1133	47.5167	44.6922	69.0173	69.485	57.8162	9.92504	0.969623	21.0155	0.243669	12.7015	19.0891	8.22472	9.76105	3.19271	1.28694	20.5368	3.90299	16.0081	7.53511	0.154	12.027	16.0278	0.0857486	0.831047
330813	1982	330813	214413	4.45705e+06	10007.2	1982	1982	1981	5	8	3	1	0	77.7	1675.5	8.36142	0.559291	69.3676	4.61018	7.46964	0	4.04335	29.4835	2.24686	7.14682	47.7379	45.0812	68.1469	69.485	57.8162	9.92504	0.969623	20.8741	0.242954	11.2316	19.3349	8.34048	9.01932	3.52855	1.37769	22.2318	3.76865	15.9129	8.11461	0.172	10.0998	14.743	0.0786029	0.918939
330813	1983	330813	214413	4.45705e+06	10007.2	1983	1982	1981	6	13	3	1	0	70.7	1753.2	8.1974	0.635676	69.842	4.51348	7.19237	0	4.10701	25.6628	2.27035	7.01745	48.3362	45.8341	71.815	59.8563	63.7492	10.0146	0.933149	20.7326	0.24224	9.76176	19.5807	8.45624	8.2776	3.8644	1.46844	23.9267	3.63431	15.8178	8.6941	0.19	8.17255	13.4582	0.0714571	1.00683
330813	1984	330813	214413	4.45705e+06	10007.2	1984	1982	1981	2	19	1	0	1	171.5	1823.9	8.03337	0.712062	70.3165	4.41679	6.9151	0	4.17067	21.842	2.29383	6.88809	48.9344	46.587	75.483	50.2276	69.6821	10.1041	0.896675	20.5911	0.241525	8.29189	19.8265	8.572	7.53587	4.20025	1.55919	25.6217	3.49997	15.7226	9.2736	0.208	6.24535	12.1734	0.0643114	1.09472
330813	1985	330813	214413	4.45705e+06	10007.2	1985	1982	1981	9	21	4	0	2	1382	1995.4	7.86935	0.788447	70.791	4.32009	6.63782	0	4.23433	18.0212	2.31731	6.75872	49.5326	47.3399	79.151	40.5989	75.6151	10.1936	0.860201	20.4496	0.240811	6.82201	20.0723	8.68776	6.79415	4.5361	1.64995	27.3166	3.36563	15.6274	9.8531	0.226	4.31816	10.8886	0.0571657	1.18262
330813	1986	330813	214413	4.45705e+06	10007.2	1986	1989	1991	3	23	1	2	0	108	3161.9	7.70533	0.864832	71.2655	4.22339	6.36055	0	4.29799	14.2005	2.3408	6.62935	50.1308	48.0927	82.819	30.9702	81.548	10.2831	0.823726	20.3081	0.240096	5.35214	20.3181	8.80352	6.05242	4.87195	1.7407	29.0116	3.23129	15.5323	10.4326	0.28	2.39096	9.60384	0.05002	1.27051
330813	1987	330813	214413	4.45705e+06	10007.2	1987	1989	1991	5	25	3	0	0	20.5	1809.9	7.54131	0.941218	71.74	4.1267	6.08328	0	4.36165	10.3797	2.36428	6.49998	50.7291	48.8456	86.4871	21.3414	87.481	10.3726	0.787252	20.1652	0.222946	6.15103	20.396	8.81138	5.69871	4.52395	2.16372	28.3935	3.35563	15.4029	10.6283	0.278	2.86758	9.48236	0.0464471	1.39413
330813	1988	330813	214413	4.45705e+06	10007.2	1988	1989	1991	13	25	3	0	1	612.6	1752.7	7.37729	1.0176	72.2145	4.03	5.806	0	4.42531	6.55898	2.38777	6.37061	51.3273	49.5985	90.1551	11.7127	93.4139	10.4621	0.750778	20.0223	0.205797	6.94992	20.4739	8.81924	5.345	4.17596	2.58675	27.7754	3.47996	15.2735	10.8241	0.208	3.34419	9.36089	0.0428743	1.51775
330813	1989	330813	214413	4.45705e+06	10007.2	1989	1989	1991	12	32	5	2	0	74.8	2294.6	7.21327	1.09399	72.6889	3.9333	5.52873	0	4.48897	2.73822	2.41125	6.24124	51.9255	50.3514	93.8231	2.08401	99.3469	10.5516	0.714304	19.8794	0.188647	7.74881	20.5518	8.8271	4.99128	3.82796	3.00978	27.1573	3.6043	15.1441	11.0198	0.207	3.82081	9.23941	0.0393014	1.64137
330813	1990	330813	214413	4.45705e+06	10007.2	1990	1989	1991	11	42	2	3	2	785	2197.9	7.04925	1.17037	73.1634	3.83661	5.25146	8.44e-06	4.42355	2.57598	2.20608	6.15079	53.2739	50.6623	94.281	2.15915	99.1291	10.3105	0.754528	19.7365	0.171497	8.54771	20.6297	8.83496	4.63757	3.47996	3.4328	26.5392	3.72863	15.0147	11.2156	0.206	4.29743	9.11793	0.0357286	1.76499
330813	1991	330813	214413	4.45705e+06	10007.2	1991	1989	1991	15	44	6	2	2	1009.5	1600.9	6.98619	1.08171	67.6985	8.9582	7.35741	1.69e-05	4.35814	2.41373	2.00091	6.06033	54.6223	50.9732	94.7389	2.23429	98.9113	10.0694	0.794751	19.5936	0.154347	9.3466	20.7076	8.84282	4.28386	3.13197	3.85583	25.9211	3.85297	14.8853	11.4113	0.204	4.77405	8.99646	0.0321557	1.88861
330813	1992	330813	214413	4.45705e+06	10007.2	1992	1989	1991	6	56	1	1	0	18.6	2502.4	6.92314	0.993047	62.2335	14.0798	9.46337	2.53e-05	4.29272	2.25148	1.79574	5.96988	55.9707	51.2841	95.1968	2.30944	98.6935	9.82832	0.834974	19.4506	0.137198	10.1455	20.7855	8.85068	3.93014	2.78397	4.27885	25.303	3.97731	14.7559	11.6071	0.203	5.25067	8.87498	0.0285829	2.01223
330813	1993	330813	214413	4.45705e+06	10007.2	1993	1989	1991	5	57	1	0	0	6.8	2500.5	6.86009	0.904383	56.7686	19.2014	11.5693	3.38e-05	4.22731	2.08924	1.59057	5.87943	57.3191	51.5951	95.6546	2.38458	98.4757	9.58723	0.875198	19.3077	0.120048	10.9444	20.8633	8.85854	3.57643	2.43597	4.70188	24.6849	4.10164	14.6266	11.8028	0.201	5.72729	8.7535	0.02501	2.13585
330813	1994	330813	214413	4.45705e+06	10007.2	1994	1989	1991	5	49	3	0	0	6.5	1894.7	6.79704	0.81572	51.3036	24.323	13.6753	4.22e-05	4.16189	1.92699	1.3854	5.78897	58.6675	51.906	96.1125	2.45972	98.2579	9.34614	0.915421	19.1648	0.102898	11.7433	20.9412	8.8664	3.22272	2.08798	5.12491	24.0668	4.22598	14.4972	11.9986	0.2	6.20391	8.63202	0.0214371	2.25947
330813	1995	330813	214413	4.45705e+06	10007.2	1995	1989	1991	23	42	3	4	0	180.1	1826.4	6.73398	0.727056	45.8386	29.4446	15.7812	5.06e-05	4.09648	1.76475	1.18023	5.69852	60.0159	52.2169	96.5704	2.53486	98.0401	9.10504	0.955645	19.0219	0.0857486	12.5422	21.0191	8.87426	2.869	1.73998	5.54793	23.4487	4.35031	14.3678	12.1943	0.198	6.68053	8.51055	0.0178643	2.3831
330813	1996	330813	214413	4.45705e+06	10007.2	1996	1999	2001	13	54	2	0	0	6.2	1221.5	6.67093	0.638392	40.3737	34.5662	17.8872	5.91e-05	4.03106	1.6025	0.975059	5.60807	61.3643	52.5278	97.0283	2.61	97.8223	8.86395	0.995869	18.879	0.0685989	13.3411	21.097	8.88212	2.51529	1.39199	5.97096	22.8306	4.47465	14.2384	12.3901	0.197	7.15715	8.38907	0.0142914	2.50672
330813	1997	330813	214413	4.45705e+06	10007.2	1997	1999	2001	3	52	0	0	0	0.1	218.2	6.60788	0.549729	34.9087	39.6878	19.9931	6.75e-05	3.96564	1.44025	0.769889	5.51761	62.7127	52.8387	97.4861	2.68514	97.6045	8.62286	1.03609	18.7361	0.0514491	14.1399	21.1749	8.88998	2.16158	1.04399	6.39399	22.2125	4.59898	14.109	12.5858	0.196	7.63377	8.26759	0.0107186	2.63034
330813	1998	330813	214413	4.45705e+06	10007.2	1998	1999	2001	9	49	0	0	0	3.09	199.7	6.54483	0.461065	29.4438	44.8094	22.0991	7.6e-05	3.90023	1.27801	0.564719	5.42716	64.0611	53.1496	97.944	2.76029	97.3867	8.38177	1.07632	18.5932	0.0342994	14.9388	21.2528	8.89784	1.80787	0.695993	6.81701	21.5944	4.72332	13.9796	12.7816	0.194	8.11039	8.14612	0.00714571	2.75396
330813	1999	330813	214413	4.45705e+06	10007.2	1999	1999	2001	9	53	2	0	0	8.46	195.99	6.48177	0.372402	23.9788	49.931	24.2051	8.44e-05	3.83481	1.11576	0.359549	5.33671	65.4095	53.4605	98.4019	2.83543	97.1689	8.14067	1.11654	18.4502	0.0171497	15.7377	21.3307	8.9057	1.45415	0.347996	7.24004	20.9762	4.84765	13.8502	12.9773	0.193	8.58701	8.02464	0.00357286	2.87758
330813	2000	330813	214413	4.45705e+06	10007.2	2000	1999	2001	10	57	2	0	0	5.53	197.95	6.41872	0.283738	18.5139	55.0526	26.311	0.698104	4.01298	1.2628	0.414983	5.04915	64.3256	48.1336	97.5016	2.83543	97.1689	8.87952	1.11654	18.3073	0	16.5366	21.4086	8.91357	1.10044	0	7.66306	20.3581	4.97199	13.7208	13.173	0.21	9.06363	7.90316	0	3.0012
330813	2001	330813	214413	4.45705e+06	10007.2	2001	1999	2001	6	44	0	0	0	0.67	23.38	6.41872	0.283738	18.5139	55.0526	26.311	1.39612	4.19115	1.40984	0.470417	4.76159	63.2417	42.8067	96.6014	2.83543	97.1689	9.61836	1.11654	18.2606	0.040016	15.8363	20.3098	8.88522	1.17047	0	7.71642	21.2935	5.7473	13.5196	13.0668	0.21	7.56832	7.07288	0.0383526	2.62773
330813	2002	330813	214413	4.45705e+06	10007.2	2002	1999	2001	2	37	0	0	0	0.03	17.85	6.41872	0.283738	18.5139	55.0526	26.311	2.09414	4.36932	1.55688	0.525851	4.47403	62.1577	37.4798	95.7011	2.83543	97.1689	10.3572	1.11654	18.214	0.080032	15.1361	19.211	8.85688	1.2405	0	7.76977	22.2289	6.52261	13.3183	12.9607	0.21	6.07302	6.2426	0.0767052	2.25426
330813	2003	330813	214413	4.45705e+06	10007.2	2003	1999	2001	3	36	0	0	1	150.77	17.78	6.41872	0.283738	18.5139	55.0526	26.311	2.79216	4.54748	1.70392	0.581284	4.18647	61.0738	32.153	94.8009	2.83543	97.1689	11.0961	1.11654	18.1673	0.120048	14.4358	18.1122	8.82853	1.31052	0	7.82313	23.1643	7.29792	13.1171	12.8545	0.21	4.57771	5.41232	0.115058	1.88079
330813	2004	330813	214413	4.45705e+06	10007.2	2004	1999	2001	9	30	2	0	0	5.74	165.46	6.41872	0.283738	18.5139	55.0526	26.311	3.49018	4.72565	1.85096	0.636718	3.89891	59.9899	26.8261	93.9006	2.83543	97.1689	11.8349	1.11654	18.1206	0.160064	13.7355	17.0135	8.80019	1.38055	0	7.87648	24.0996	8.07323	12.9158	12.7483	0.21	3.08241	4.58204	0.15341	1.50732
330813	2005	330813	214413	4.45705e+06	10007.2	2005	1999	2001	9	30	1	0	0	8.43	162.74	6.41872	0.283738	18.5139	55.0526	26.311	4.1882	4.90382	1.998	0.692152	3.61135	58.906	21.4992	93.0003	2.83543	97.1689	12.5737	1.11654	18.0739	0.20008	13.0352	15.9147	8.77184	1.45058	0	7.92984	25.035	8.84854	12.7146	12.6421	0.21	1.5871	3.75176	0.191763	1.13385
330813	2006	330813	214413	4.45705e+06	10007.2	2006	2009	2001	2	29	0	0	0	0.9	165.64	6.41872	0.283738	18.5139	55.0526	26.311	4.88622	5.08199	2.14504	0.747586	3.32379	57.8221	16.1723	92.1001	2.83543	97.1689	13.3126	1.11654	18.0272	0.240096	12.3349	14.8159	8.7435	1.52061	0	7.98319	25.9704	9.62385	12.5133	12.5359	0.11	0.091798	2.92148	0.230116	0.760382
330813	2007	330813	214413	4.45705e+06	10007.2	2007	2009	2001	2	25	0	0	0	0.03	165.87	6.41872	0.283738	18.5139	55.0526	26.311	5.58424	5.26016	2.29208	0.80302	3.03623	56.7382	10.8455	91.1998	2.83543	97.1689	14.0514	1.11654	18.0272	0.240096	12.3349	14.8159	8.7435	1.52061	0	7.98319	25.9704	9.62385	12.5133	12.5359	0.11	0.091798	2.92148	0.230116	0.760382
330813	2008	330813	214413	4.45705e+06	10007.2	2008	2009	2001	3	25	1	0	0	3.04	165.87	6.41872	0.283738	18.5139	55.0526	26.311	6.98028	5.61649	2.58616	0.913888	2.46112	54.5703	0.191714	89.3993	2.83543	97.1689	15.5291	1.11654	18.0272	0.240096	12.3349	14.8159	8.7435	1.52061	0	7.98319	25.9704	9.62385	12.5133	12.5359	0.11	0	2.0912	0.268468	0.386912
330814	1979	330814	213738	4447070	10007.7	1979	1972	1981	2	7	2	0	0	15	469	16.162	1.10013	58.5081	9.89779	8.20501	6.408	4.26467	33.6032	8.59417	7.69775	43.2721	31.7198	50.8246	72.5384	69.6165	23.22	58.6679	23.6642	0.965579	0.15009	13.2429	7.48949	13.5231	0.065039	11.7871	28.7222	0.015009	11.2967	13.1922	0.119	0.170102	20.057	0.860516	0
330814	1980	330814	213738	4447070	10007.7	1980	1982	1981	3	8	1	2	0	54	414	15.947	1.10013	58.5081	9.89779	8.20501	7.195	4.25334	35.1503	8.89468	7.8741	42.6137	31.3767	48.3388	72.5384	69.6165	23.22	58.6679	23.4341	0.996312	0.128649	13.035	8.13631	13.0693	0.0743303	11.6656	29.026	0.0171531	11.4958	13.4952	0.128	0.145802	18.1051	0.884816	0
330814	1981	330814	213738	4447070	10007.7	1981	1982	1981	3	10	2	0	1	161	403	15.8039	1.26192	58.6243	9.60901	8.74891	7.982	4.242	36.6975	9.19518	8.05046	41.9553	31.0336	45.8531	72.5384	69.6165	23.22	58.6679	23.2039	1.02704	0.107207	12.827	8.78313	12.6154	0.0836216	11.5441	29.3297	0.0192973	11.6949	13.7981	0.137	0.121501	16.1533	0.909117	0
330814	1982	330814	213738	4447070	10007.7	1982	1982	1981	1	12	0	0	0	0.5	560	15.6608	1.4237	58.7405	9.32023	9.29281	8.769	4.23067	38.2447	9.49568	8.22682	41.2969	30.6905	43.3673	72.5384	69.6165	23.22	58.6679	22.9738	1.05778	0.0857657	12.619	9.42994	12.1616	0.0929129	11.4226	29.6335	0.0214414	11.8939	14.1011	0.146	0.0972011	14.2014	0.933417	0
330814	1983	330814	213738	4447070	10007.7	1983	1982	1981	0	12	0	0	0	0	545.5	15.5177	1.58549	58.8567	9.03145	9.83671	7.606	4.24228	34.3255	8.86975	7.97738	42.586	32.1865	48.844	63.9151	73.7252	23.8665	50.4494	22.7436	1.08851	0.0643243	12.411	10.0768	11.7077	0.102204	11.3011	29.9372	0.0235856	12.093	14.4041	0.155	0.0729009	12.2495	0.957717	0
330814	1984	330814	213738	4447070	10007.7	1984	1982	1981	4	9	1	2	1	256	230.5	15.3746	1.74727	58.9729	8.74267	10.3806	6.44404	4.25388	30.4063	8.24383	7.72794	43.875	33.6826	54.3206	55.2917	77.8339	24.513	42.2309	22.5135	1.11924	0.0428829	12.203	10.7236	11.2539	0.111495	11.1796	30.241	0.0257297	12.2921	14.707	0.164	0.0486006	10.2976	0.982017	0
330814	1985	330814	213738	4447070	10007.7	1985	1982	1981	8	11	1	4	2	470	471.5	15.2315	1.90905	59.0891	8.45389	10.9245	5.28171	4.26549	26.4871	7.6179	7.4785	45.1641	35.1786	59.7972	46.6684	81.9426	25.1595	34.0124	22.2834	1.14998	0.0214414	11.9951	11.3704	10.8001	0.120787	11.0581	30.5448	0.0278739	12.4912	15.01	0.173	0.0243003	8.34572	1.00632	0
330814	1986	330814	213738	4447070	10007.7	1986	1989	1991	4	16	2	1	1	315	887.5	15.0884	2.07084	59.2053	8.16511	11.4684	4.11937	4.2771	22.5679	6.99197	7.22906	46.4532	36.6747	65.2739	38.045	86.0513	25.806	25.7939	22.0532	1.18071	0	11.7871	12.0172	10.3462	0.130078	10.9366	30.8485	0.030018	12.6902	15.3129	0.2	0	6.39384	1.03062	0
330814	1987	330814	213738	4447070	10007.7	1987	1989	1991	9	17	6	1	1	551	1041.5	14.9453	2.23262	59.3215	7.87633	12.0123	2.95703	4.2887	18.6488	6.36604	6.97962	47.7423	38.1707	70.7505	29.4217	90.16	26.4525	17.5755	22.0775	1.15927	0	11.93	11.161	9.70296	0.120787	11.4883	30.8256	0.595357	12.6006	15.8697	0.198	0.00929129	6.67329	1.34009	0.0107207
330814	1988	330814	213738	4447070	10007.7	1988	1989	1991	10	25	4	1	0	32.5	1592	14.8022	2.39441	59.4377	7.58755	12.5562	1.7947	4.30031	14.7296	5.74011	6.73018	49.0314	39.6668	76.2271	20.7983	94.2687	27.099	9.35697	22.1018	1.13783	0	12.073	10.3048	9.05972	0.111495	12.0401	30.8028	1.1607	12.511	16.4264	0.198	0.0185826	6.95274	1.64956	0.0214414
330814	1989	330814	213738	4447070	10007.7	1989	1989	1991	15	35	6	7	1	1985	1624.5	14.6591	2.55619	59.5539	7.29877	13.1001	0.632358	4.31191	10.8104	5.11418	6.48074	50.3204	41.1628	81.7038	12.175	98.3775	27.7456	1.13848	22.1261	1.11638	0	12.2159	9.44853	8.41648	0.102204	12.5918	30.7799	1.72604	12.4214	16.9832	0.197	0.0278739	7.2322	1.95903	0.0321621
330814	1990	330814	213738	4447070	10007.7	1990	1989	1991	5	46	2	3	0	59	3353.5	14.516	2.71797	59.6701	7.00999	13.644	0.606262	4.35067	10.2651	4.71602	6.56268	50.4729	42.413	82.8349	12.0811	98.0041	29.3256	1.2213	22.1504	1.09494	0	12.3588	8.5923	7.77324	0.0929129	13.1436	30.757	2.29137	12.3317	17.5399	0.196	0.0371651	7.51165	2.2685	0.0428829
330814	1991	330814	213738	4447070	10007.7	1991	1989	1991	21	43	8	6	1	397	2942.5	14.4934	2.56998	55.3271	11.098	15.8543	0.580165	4.38943	9.71982	4.31785	6.64462	50.6253	43.6632	83.966	11.9872	97.6307	30.9057	1.30412	22.1747	1.0735	0	12.5018	7.73607	7.12999	0.0836216	13.6954	30.7342	2.85671	12.2421	18.0967	0.194	0.0464564	7.7911	2.57798	0.0536036
330814	1992	330814	213738	4447070	10007.7	1992	1989	1991	11	60	5	3	0	79.5	3024.5	14.4707	2.42199	50.984	15.186	18.0647	0.554068	4.42818	9.17454	3.91968	6.72656	50.7778	44.9134	85.0971	11.8933	97.2573	32.4857	1.38694	22.199	1.05206	0	12.6447	6.87984	6.48675	0.0743303	14.2471	30.7113	3.42205	12.1525	18.6534	0.193	0.0557477	8.07056	2.88745	0.0643243
330814	1993	330814	213738	4447070	10007.7	1993	1989	1991	11	62	5	1	0	35.3	2553	14.4481	2.274	46.6409	19.2739	20.275	0.527971	4.46694	8.62925	3.52151	6.8085	50.9302	46.1636	86.2282	11.7994	96.8839	34.0658	1.46976	22.2233	1.03062	0	12.7877	6.02361	5.84351	0.065039	14.7989	30.6884	3.98739	12.0628	19.2101	0.191	0.065039	8.35001	3.19692	0.075045
330814	1994	330814	213738	4447070	10007.7	1994	1989	1991	10	63	3	1	0	46.5	2555.8	14.4254	2.12601	42.2978	23.3619	22.4853	0.501874	4.50569	8.08397	3.12334	6.89044	51.0827	47.4138	87.3594	11.7055	96.5106	35.6458	1.55258	22.2476	1.00918	0	12.9306	5.16739	5.20026	0.0557477	15.3506	30.6655	4.55273	11.9732	19.7669	0.19	0.0743303	8.62946	3.50639	0.0857657
330814	1995	330814	213738	4447070	10007.7	1995	1989	1991	23	58	8	6	0	294.3	617.3	14.4028	1.97801	37.9548	27.4499	24.6956	0.475778	4.54445	7.53869	2.72517	6.97238	51.2351	48.664	88.4905	11.6116	96.1372	37.2259	1.63539	22.2719	0.987735	0	13.0736	4.31116	4.55702	0.0464564	15.9024	30.6427	5.11807	11.8836	20.3236	0.188	0.0836216	8.90892	3.81586	0.0964864
330814	1996	330814	213738	4447070	10007.7	1996	1999	2001	6	76	1	1	0	17.3	852.6	14.3801	1.83002	33.6117	31.5379	26.906	0.449681	4.5832	6.9934	2.32701	7.05432	51.3876	49.9142	89.6216	11.5177	95.7638	38.8059	1.71821	22.2962	0.966294	0	13.2165	3.45493	3.91378	0.0371651	16.4542	30.6198	5.68341	11.794	20.8804	0.187	0.0929129	9.18837	4.12533	0.107207
330814	1997	330814	213738	4447070	10007.7	1997	1999	2001	5	61	3	0	0	7.5	472.9	14.3575	1.68203	29.2686	35.6259	29.1163	0.423584	4.62196	6.44812	1.92884	7.13626	51.54	51.1644	90.7527	11.4238	95.3904	40.386	1.80103	22.3205	0.944852	0	13.3594	2.5987	3.27053	0.0278739	17.0059	30.5969	6.24875	11.7043	21.4371	0.186	0.102204	9.46782	4.4348	0.117928
330814	1998	330814	213738	4447070	10007.7	1998	1999	2001	22	55	8	0	0	25.96	400.9	14.3348	1.53404	24.9256	39.7138	31.3266	0.397487	4.66071	5.90283	1.53067	7.21821	51.6925	52.4146	91.8838	11.3299	95.0171	41.966	1.88385	22.3448	0.923411	0	13.5024	1.74247	2.62729	0.0185826	17.5577	30.5741	6.81409	11.6147	21.9938	0.184	0.111495	9.74728	4.74428	0.128649
330814	1999	330814	213738	4447070	10007.7	1999	1999	2001	9	66	3	1	0	31.83	391.56	14.3122	1.38605	20.5825	43.8018	33.537	0.37139	4.69947	5.35755	1.1325	7.30015	51.8449	53.6648	93.015	11.2359	94.6437	43.5461	1.96667	22.3691	0.901969	0	13.6453	0.886246	1.98405	0.00929129	18.1094	30.5512	7.37943	11.5251	22.5506	0.183	0.120787	10.0267	5.05375	0.139369
330814	2000	330814	213738	4447070	10007.7	2000	1999	2001	17	65	3	1	0	27.02	376.89	14.2895	1.23805	16.2394	47.8898	35.7473	1.03737	4.46995	5.8279	1.32899	7.97053	52.4788	48.4308	91.6824	11.2359	94.6437	43.968	1.96667	22.3934	0.880528	0	13.7883	0.030018	1.3408	0	18.6612	30.5283	7.94477	11.4355	23.1073	0.2	0.130078	10.3062	5.36322	0.15009
330814	2001	330814	213738	4447070	10007.7	2001	1999	2001	14	59	8	0	0	37.34	109.61	14.2895	1.23805	16.2394	47.8898	35.7473	1.70335	4.24042	6.29825	1.52549	8.64091	53.1128	43.1968	90.3499	11.2359	94.6437	44.3899	1.96667	22.4518	0.935561	0	13.8366	0.030018	1.46588	0	18.893	29.7145	7.92476	11.5895	22.6988	0.2	0.108398	9.14802	4.52437	0.125075
330814	2002	330814	213738	4447070	10007.7	2002	1999	2001	12	67	4	1	0	36.4	129.65	14.2895	1.23805	16.2394	47.8898	35.7473	2.36932	4.0109	6.7686	1.72198	9.31129	53.7467	37.9629	89.0174	11.2359	94.6437	44.8118	1.96667	22.5102	0.990594	0	13.885	0.030018	1.59095	0	19.1248	28.9007	7.90474	11.7436	22.2903	0.2	0.0867187	7.98986	3.68553	0.10006
330814	2003	330814	213738	4447070	10007.7	2003	1999	2001	18	74	5	0	0	19.21	158.55	14.2895	1.23805	16.2394	47.8898	35.7473	3.0353	3.78138	7.23896	1.91847	9.98167	54.3807	32.7289	87.6849	11.2359	94.6437	45.2337	1.96667	22.5685	1.04563	0	13.9334	0.030018	1.71603	0	19.3566	28.0869	7.88473	11.8977	21.8818	0.2	0.065039	6.8317	2.84669	0.075045
330814	2004	330814	213738	4447070	10007.7	2004	1999	2001	28	70	8	4	1	875.76	151.8	14.2895	1.23805	16.2394	47.8898	35.7473	3.70128	3.55186	7.70931	2.11497	10.6521	55.0146	27.4949	86.3523	11.2359	94.6437	45.6557	1.96667	22.6269	1.10066	0	13.9817	0.030018	1.8411	0	19.5884	27.273	7.86472	12.0517	21.4733	0.2	0.0433593	5.67354	2.00784	0.05003
330814	2005	330814	213738	4447070	10007.7	2005	1999	2001	8	89	2	1	0	36.68	995.73	14.2895	1.23805	16.2394	47.8898	35.7473	4.36726	3.32234	8.17966	2.31146	11.3224	55.6486	22.2609	85.0198	11.2359	94.6437	46.0776	1.96667	22.6853	1.15569	0	14.0301	0.030018	1.96618	0	19.8202	26.4592	7.84471	12.2058	21.0649	0.2	0.0216797	4.51537	1.169	0.025015
330814	2006	330814	213738	4447070	10007.7	2006	2009	2001	9	80	2	2	0	72.67	1005.39	14.2895	1.23805	16.2394	47.8898	35.7473	5.03324	3.09282	8.65001	2.50796	11.9928	56.2825	17.027	83.6873	11.2359	94.6437	46.4995	1.96667	22.7436	1.21073	0	14.0784	0.030018	2.09125	0	20.052	25.6454	7.8247	12.3599	20.6564	0.16	0	3.35721	0.330155	0
330814	2007	330814	213738	4447070	10007.7	2007	2009	2001	2	75	0	0	0	0.12	1040.72	14.2895	1.23805	16.2394	47.8898	35.7473	5.69921	2.86329	9.12036	2.70445	12.6632	56.9165	11.793	82.3548	11.2359	94.6437	46.9214	1.96667	22.7436	1.21073	0	14.0784	0.030018	2.09125	0	20.052	25.6454	7.8247	12.3599	20.6564	0.16	0	3.35721	0.330155	0
330814	2008	330814	213738	4447070	10007.7	2008	2009	2001	9	65	3	0	0	7.75	1004.44	14.2895	1.23805	16.2394	47.8898	35.7473	7.03117	2.40425	10.0611	3.09744	14.004	58.1844	1.32506	79.6897	11.2359	94.6437	47.7652	1.96667	22.7436	1.21073	0	14.0784	0.030018	2.09125	0	20.052	25.6454	7.8247	12.3599	20.6564	0.16	0	2.19905	0	0
330815	1979	330815	213063	4.43709e+06	10008.1	1979	1972	1981	0	0	0	0	0	0	0	34.8421	1.71825	59.9853	8.59737	10.2343	11.899	4.89059	26.3124	20.6184	6.42098	32.3417	31.7413	40.3318	63.8101	70.2891	28.8896	125.315	3.50175	0.230115	0	2.06603	1.42071	73.2266	0	6.6033	12.5863	0.0350175	11.2326	3.06068	0	0	35.978	0.290145	0
330815	1980	330815	213063	4.43709e+06	10008.1	1980	1982	1981	1	0	0	1	0	88	0	34.5365	1.71825	59.9853	8.59737	10.2343	13.092	4.87899	26.8272	20.5991	6.45061	31.481	31.5038	38.8817	63.8101	70.2891	28.8896	125.315	3.62181	0.242979	0	2.00529	1.53648	73.3052	0	5.99871	12.9293	0.04002	11.9711	3.0813	0	0	31.6215	0.311584	0
330815	1981	330815	213063	4.43709e+06	10008.1	1981	1982	1981	0	1	0	0	0	0	88	34.5868	1.91909	59.5622	8.55513	10.8236	14.284	4.86739	27.3419	20.5797	6.48023	30.6202	31.2664	37.4316	63.8101	70.2891	28.8896	125.315	3.74187	0.255842	0	1.94454	1.65225	73.3838	0	5.39413	13.2724	0.0450225	12.7095	3.10193	0	0	27.2651	0.333024	0
330815	1982	330815	213063	4.43709e+06	10008.1	1982	1982	1981	0	1	0	0	0	0	88	34.6371	2.11993	59.1392	8.51289	11.4128	15.477	4.85578	27.8567	20.5604	6.50986	29.7594	31.029	35.9815	63.8101	70.2891	28.8896	125.315	3.86193	0.268706	0	1.8838	1.76803	73.4624	0	4.78954	13.6154	0.050025	13.4479	3.12255	0	0	22.9086	0.354463	0
330815	1983	330815	213063	4.43709e+06	10008.1	1983	1982	1981	0	1	0	0	0	0	88	34.6874	2.32077	58.7161	8.47066	12.0021	13.535	4.83482	25.3744	19.5252	6.60225	32.2565	31.1018	41.2091	57.6348	74.2184	29.7616	107.722	3.98199	0.281569	0	1.82305	1.8838	73.5411	0	4.18495	13.9584	0.0550275	14.1864	3.14318	0	0	18.5521	0.375902	0
330815	1984	330815	213063	4.43709e+06	10008.1	1984	1982	1981	0	1	0	0	0	0	88	34.7378	2.52161	58.293	8.42842	12.5913	11.5938	4.81385	22.892	18.49	6.69463	34.7537	31.1745	46.4367	51.4595	78.1478	30.6335	90.1286	4.10205	0.294433	0	1.76231	1.99957	73.6197	0	3.58036	14.3014	0.06003	14.9248	3.1638	0	0	14.1957	0.397341	0
330815	1985	330815	213063	4.43709e+06	10008.1	1985	1982	1981	0	1	0	0	0	0	88	34.7881	2.72245	57.87	8.38618	13.1806	9.65221	4.79288	20.4097	17.4548	6.78702	37.2508	31.2473	51.6642	45.2843	82.0771	31.5054	72.5356	4.22211	0.307296	0	1.70156	2.11534	73.6983	0	2.97577	14.6445	0.0650325	15.6632	3.18442	0	0	9.8392	0.418781	0
330815	1986	330815	213063	4.43709e+06	10008.1	1986	1989	1991	0	0	0	0	0	0	0	34.8384	2.92328	57.4469	8.34394	13.7698	7.71061	4.77191	17.9273	16.4196	6.87941	39.7479	31.3201	56.8918	39.109	86.0065	32.3773	54.9427	4.34217	0.32016	0	1.64082	2.23112	73.7769	0	2.37119	14.9875	0.070035	16.4017	3.20505	0	0	5.48274	0.44022	0
330815	1987	330815	213063	4.43709e+06	10008.1	1987	1989	1991	0	0	0	0	0	0	0	34.8887	3.12412	57.0238	8.30171	14.3591	5.76901	4.75095	15.445	15.3844	6.9718	42.245	31.3928	62.1194	32.9337	89.9359	33.2492	37.3497	4.31073	0.297291	0	1.68441	2.10462	73.5482	0	2.5234	15.1426	0.110055	16.1095	3.33131	0	0	5.35125	0.436647	0
330815	1988	330815	213063	4.43709e+06	10008.1	1988	1989	1991	1	0	0	0	0	0	0	34.9391	3.32496	56.6008	8.25947	14.9483	3.8274	4.72998	12.9626	14.3492	7.06419	44.7422	31.4656	67.347	26.7584	93.8652	34.1211	19.7567	4.27928	0.274423	0	1.72801	1.97813	73.3195	0	2.67562	15.2976	0.150075	15.8174	3.45756	0	0	5.21975	0.433074	0
330815	1989	330815	213063	4.43709e+06	10008.1	1989	1989	1991	0	1	0	0	0	0	0	34.9894	3.5258	56.1777	8.21723	15.5376	1.8858	4.70901	10.4803	13.314	7.15658	47.2393	31.5384	72.5746	20.5831	97.7946	34.9931	2.16368	4.24784	0.251554	0	1.7716	1.85164	73.0908	0	2.82784	15.4527	0.190095	15.5253	3.58382	0	0	5.08826	0.4295	0
330815	1990	330815	213063	4.43709e+06	10008.1	1990	1989	1991	0	1	0	0	0	0	0	35.0397	3.72664	55.7546	8.17499	16.1268	1.74528	4.6915	10.7761	12.322	7.30026	47.6782	32.8109	73.5735	20.4395	96.8859	38.3738	2.18602	4.21639	0.228686	0	1.81519	1.72515	72.8621	0	2.98006	15.6078	0.230115	15.2332	3.71008	0	0	4.95676	0.425927	0
330815	1991	330815	213063	4.43709e+06	10008.1	1991	1989	1991	1	1	1	0	0	5	0	35.2311	3.55056	51.8688	12.5947	17.5749	1.60475	4.67399	11.0719	11.3301	7.44393	48.1171	34.0833	74.5724	20.2959	95.9773	41.7546	2.20836	4.18495	0.205817	0	1.85879	1.59866	72.6335	0	3.13228	15.7629	0.270135	14.941	3.83633	0	0	4.82527	0.422354	0
330815	1992	330815	213063	4.43709e+06	10008.1	1992	1989	1991	0	2	0	0	0	0	5	35.4225	3.37449	47.9829	17.0145	19.0229	1.46423	4.65648	11.3678	10.3381	7.58761	48.5561	35.3558	75.5713	20.1523	95.0687	45.1354	2.2307	4.15351	0.182949	0	1.90238	1.47216	72.4048	0	3.2845	15.918	0.310155	14.6489	3.96259	0	0	4.69378	0.418781	0
330815	1993	330815	213063	4.43709e+06	10008.1	1993	1989	1991	2	2	1	0	0	3	5	35.6139	3.19841	44.097	21.4342	20.471	1.32371	4.63897	11.6636	9.34617	7.73129	48.995	36.6283	76.5702	20.0088	94.16	48.5162	2.25304	4.12206	0.16008	0	1.94597	1.34567	72.1761	0	3.43672	16.073	0.350175	14.3568	4.08885	0	0	4.56228	0.415208	0
330815	1994	330815	213063	4.43709e+06	10008.1	1994	1989	1991	0	3	0	0	0	0	8	35.8053	3.02233	40.2111	25.8539	21.9191	1.18318	4.62146	11.9594	8.35421	7.87497	49.4339	37.9008	77.569	19.8652	93.2514	51.897	2.27538	4.09062	0.137211	0	1.98957	1.21918	71.9474	0	3.58894	16.2281	0.390195	14.0647	4.2151	0	0	4.43079	0.411634	0
330815	1995	330815	213063	4.43709e+06	10008.1	1995	1989	1991	4	3	3	0	0	10.5	8	35.9967	2.84626	36.3252	30.2737	23.3671	1.04266	4.60395	12.2552	7.36226	8.01865	49.8729	39.1733	78.5679	19.7216	92.3428	55.2778	2.29772	4.05917	0.114343	0	2.03316	1.09269	71.7187	0	3.74116	16.3832	0.430215	13.7725	4.34136	0	0	4.29929	0.408061	0
330815	1996	330815	213063	4.43709e+06	10008.1	1996	1999	2001	0	7	0	0	0	0	18.5	36.188	2.67018	32.4393	34.6934	24.8152	0.902135	4.58644	12.5511	6.3703	8.16233	50.3118	40.4458	79.5668	19.5781	91.4341	58.6585	2.32007	4.02773	0.0914743	0	2.07675	0.966197	71.49	0	3.89338	16.5383	0.470235	13.4804	4.46762	0	0	4.1678	0.404488	0
330815	1997	330815	213063	4.43709e+06	10008.1	1997	1999	2001	1	6	0	0	0	0.2	13.5	36.3794	2.4941	28.5534	39.1131	26.2633	0.761612	4.56893	12.8469	5.37834	8.30601	50.7507	41.7182	80.5657	19.4345	90.5255	62.0393	2.34241	3.99628	0.0686057	0	2.12035	0.839706	71.2613	0	4.04559	16.6933	0.510255	13.1883	4.59387	0	0	4.0363	0.400915	0
330815	1998	330815	213063	4.43709e+06	10008.1	1998	1999	2001	3	7	3	0	0	10	13.7	36.5708	2.31803	24.6675	43.5328	27.7113	0.621088	4.55142	13.1427	4.38638	8.44969	51.1896	42.9907	81.5646	19.2909	89.6169	65.4201	2.36475	3.96484	0.0457371	0	2.16394	0.713214	71.0327	0	4.19781	16.8484	0.550275	12.8962	4.72013	0	0	3.90481	0.397341	0
330815	1999	330815	213063	4.43709e+06	10008.1	1999	1999	2001	8	8	1	0	0	11.25	20.7	36.7622	2.14195	20.7816	47.9526	29.1594	0.480565	4.53391	13.4385	3.39442	8.59337	51.6286	44.2632	82.5635	19.1473	88.7082	68.8009	2.38709	3.9334	0.0228686	0	2.20753	0.586722	70.804	0	4.35003	17.0035	0.590295	12.604	4.84639	0	0	3.77332	0.393768	0
330815	2000	330815	213063	4.43709e+06	10008.1	2000	1999	2001	1	16	1	0	0	1.05	31.95	36.9536	1.96588	16.8958	52.3723	30.6075	1.12088	4.39884	14.4744	3.64909	9.42774	52.1443	40.0367	80.6327	19.1473	88.7082	70.0984	2.38709	3.90195	0	0	2.25113	0.46023	70.5753	0	4.50225	17.1586	0.630315	12.3119	4.97264	0	0	3.64182	0.390195	0
330815	2001	330815	213063	4.43709e+06	10008.1	2001	1999	2001	3	13	2	0	0	10	22.5	36.9536	1.96588	16.8958	52.3723	30.6075	1.7612	4.26377	15.5102	3.90375	10.2621	52.66	35.8101	78.702	19.1473	88.7082	71.3959	2.38709	3.83192	0.0383525	0	2.24279	0.383525	70.5569	0	4.91746	16.6733	0.835418	12.5764	5.1307	0	0.0200088	3.06963	0.361403	0.0616937
330815	2002	330815	213063	4.43709e+06	10008.1	2002	1999	2001	4	16	0	1	0	17.05	32.5	36.9536	1.96588	16.8958	52.3723	30.6075	2.40152	4.1287	16.546	4.15842	11.0965	53.1757	31.5836	76.7713	19.1473	88.7082	72.6935	2.38709	3.76188	0.076705	0	2.23445	0.30682	70.5386	0	5.33267	16.1881	1.04052	12.8409	5.28876	0	0.0400175	2.49744	0.332611	0.123387
330815	2003	330815	213063	4.43709e+06	10008.1	2003	1999	2001	1	19	0	0	0	0.06	49.35	36.9536	1.96588	16.8958	52.3723	30.6075	3.04184	3.99363	17.5818	4.41308	11.9308	53.6914	27.3571	74.8405	19.1473	88.7082	73.991	2.38709	3.69185	0.115057	0	2.22611	0.230115	70.5203	0	5.74787	15.7029	1.24562	13.1054	5.44681	0	0.0600263	1.92525	0.303819	0.185081
330815	2004	330815	213063	4.43709e+06	10008.1	2004	1999	2001	5	17	1	0	0	7.15	39.41	36.9536	1.96588	16.8958	52.3723	30.6075	3.68216	3.85856	18.6176	4.66775	12.7652	54.2071	23.1306	72.9098	19.1473	88.7082	75.2885	2.38709	3.62181	0.15341	0	2.21778	0.15341	70.5019	0	6.16308	15.2176	1.45073	13.3699	5.60487	0	0.0800351	1.35306	0.275027	0.246775
330815	2005	330815	213063	4.43709e+06	10008.1	2005	1999	2001	0	14	0	0	0	0	35.31	36.9536	1.96588	16.8958	52.3723	30.6075	4.32247	3.72349	19.6535	4.92242	13.5996	54.7228	18.904	70.9791	19.1473	88.7082	76.586	2.38709	3.55178	0.191763	0	2.20944	0.076705	70.4836	0	6.57829	14.7324	1.65583	13.6344	5.76292	0	0.100044	0.780871	0.246235	0.308469
330815	2006	330815	213063	4.43709e+06	10008.1	2006	2009	2001	4	13	2	0	0	8.04	34.26	36.9536	1.96588	16.8958	52.3723	30.6075	4.96279	3.58842	20.6893	5.17708	14.4339	55.2385	14.6775	69.0484	19.1473	88.7082	77.8836	2.38709	3.48174	0.230115	0	2.2011	0	70.4652	0	6.9935	14.2471	1.86093	13.8989	5.92098	0	0.120053	0.208681	0.217443	0.370162
330815	2007	330815	213063	4.43709e+06	10008.1	2007	2009	2001	0	14	0	0	0	0	32.3	36.9536	1.96588	16.8958	52.3723	30.6075	5.60311	3.45335	21.7251	5.43175	15.2683	55.7542	10.451	67.1176	19.1473	88.7082	79.1811	2.38709	3.48174	0.230115	0	2.2011	0	70.4652	0	6.9935	14.2471	1.86093	13.8989	5.92098	0	0.120053	0.208681	0.217443	0.370162
330815	2008	330815	213063	4.43709e+06	10008.1	2008	2009	2001	2	10	1	0	0	6.55	15.25	36.9536	1.96588	16.8958	52.3723	30.6075	6.88375	3.18321	23.7967	5.94108	16.937	56.7856	1.9979	63.2562	19.1473	88.7082	81.7761	2.38709	3.48174	0.230115	0	2.2011	0	70.4652	0	6.9935	14.2471	1.86093	13.8989	5.92098	0	0.140061	0	0.188651	0.431856
330903	1979	330903	231217	4.55616e+06	10004.4	1979	1972	1981	0	0	0	0	0	0	0	2.60755	0.001715	92.8036	0.703623	0.813721	0.004	0.638083	46.2765	4.39332	79.8458	42.4647	3.36566	48.817	71.2966	25.3853	24.7246	34.6935	62.5063	0	0	0	1.25063	9.76989	0	17.7639	7.90895	0.8004	1.74466	19.709	0.09	0	6.49825	0	0.170085
330903	1980	330903	231217	4.55616e+06	10004.4	1980	1982	1981	0	0	0	0	0	0	0	2.48336	0.001715	92.8036	0.703623	0.813721	0.003	0.640658	48.0223	4.84794	79.498	42.2981	3.68986	46.7545	71.2966	25.3853	24.7246	34.6935	62.507	0	0	0	1.22347	9.27893	0	18.4092	7.66669	0.914743	1.76853	20.1753	0.09	0	5.9687	0	0.194383
330903	1981	330903	231217	4.55616e+06	10004.4	1981	1982	1981	0	0	0	0	0	0	0	2.43037	0.0091635	90.2427	0.940857	1.32521	0.001	0.643232	49.7681	5.30256	79.1502	42.1314	4.01406	44.6919	71.2966	25.3853	24.7246	34.6935	62.5077	0	0	0	1.19631	8.78797	0	19.0545	7.42443	1.02909	1.79241	20.6417	0.09	0	5.43915	0	0.218681
330903	1982	330903	231217	4.55616e+06	10004.4	1982	1982	1981	0	0	0	0	0	0	0	2.37737	0.016612	87.6817	1.17809	1.83669	0	0.645807	51.514	5.75719	78.8024	41.9648	4.33826	42.6294	71.2966	25.3853	24.7246	34.6935	62.5084	0	0	0	1.16916	8.29701	0	19.6999	7.18216	1.14343	1.81629	21.1081	0.09	0	4.9096	0	0.242979
330903	1983	330903	231217	4.55616e+06	10004.4	1983	1982	1981	0	0	0	0	0	0	0	2.32438	0.0240605	85.1207	1.41533	2.34818	0	0.623695	50.7921	6.34717	79.3978	40.8315	4.3361	42.5253	71.3276	35.2155	25.2208	29.8323	62.5091	0	0	0	1.142	7.80605	0	20.3452	6.9399	1.25777	1.84017	21.5745	0.09	0	4.38005	0	0.267276
330903	1984	330903	231217	4.55616e+06	10004.4	1984	1982	1981	0	0	0	0	0	0	0	2.27139	0.031509	82.5597	1.65256	2.85966	0	0.601583	50.0702	6.93716	79.9931	39.6982	4.33394	42.4213	71.3586	45.0456	25.7171	24.9712	62.5098	0	0	0	1.11484	7.31509	0	20.9905	6.69763	1.37211	1.86405	22.0408	0.09	0	3.8505	0	0.291574
330903	1985	330903	231217	4.55616e+06	10004.4	1985	1982	1981	0	0	0	0	0	0	0	2.21839	0.0389575	79.9987	1.88979	3.37115	0	0.579471	49.3484	7.52715	80.5884	38.5649	4.33178	42.3173	71.3896	54.8757	26.2133	20.1101	62.5105	0	0	0	1.08769	6.82413	0	21.6358	6.45537	1.48646	1.88793	22.5072	0.09	0	3.32095	0	0.315872
330903	1986	330903	231217	4.55616e+06	10004.4	1986	1989	1991	0	0	0	0	0	0	0	2.1654	0.046406	77.4377	2.12703	3.88263	0	0.557359	48.6265	8.11713	81.1838	37.4317	4.32962	42.2132	71.4206	64.7059	26.7095	15.2489	62.5113	0	0	0	1.06053	6.33317	0	22.2811	6.21311	1.6008	1.91181	22.9736	0.09	0	2.7914	0	0.34017
330903	1987	330903	231217	4.55616e+06	10004.4	1987	1989	1991	0	0	0	0	0	0	0	2.1124	0.0538545	74.8767	2.36426	4.39412	0	0.535247	47.9047	8.70712	81.7791	36.2984	4.32746	42.1092	71.4516	74.536	27.2058	10.3878	61.4229	0	0	0	1.46144	6.6469	0	21.8574	6.21382	2.19395	2.23239	23.3655	0.089	0.0443079	3.36811	0	0.479525
330903	1988	330903	231217	4.55616e+06	10004.4	1988	1989	1991	2	0	0	2	0	100	0	2.05941	0.061303	72.3157	2.6015	4.9056	0	0.513135	47.1828	9.2971	82.3744	35.1651	4.3253	42.0052	71.4826	84.3661	27.702	5.52668	60.3345	0	0	0	1.86236	6.96062	0	21.4336	6.21454	2.78711	2.55297	23.7573	0.149	0.0886157	3.94483	0	0.618881
330903	1989	330903	231217	4.55616e+06	10004.4	1989	1989	1991	0	2	0	0	0	0	100	2.00641	0.0687515	69.7547	2.83873	5.41709	0	0.491022	46.4609	9.88709	82.9698	34.0318	4.32315	41.9012	71.5136	94.1963	28.1983	0.665554	59.2461	0	0	0	2.26327	7.27435	0	21.0098	6.21525	3.38026	2.87355	24.1492	0.147	0.132924	4.52155	0	0.758236
330903	1990	330903	231217	4.55616e+06	10004.4	1990	1989	1991	0	2	0	0	0	0	100	1.95342	0.0762	67.1937	3.07597	5.92857	0.0006418	0.490216	48.5423	9.20196	83.2182	33.4336	4.25264	40.6695	72.2217	92.8237	29.8345	0.643821	58.1577	0	0	0	2.66419	7.58808	0	20.586	6.21597	3.97341	3.19414	24.5411	0.146	0.177231	5.09826	0	0.897592
330903	1991	330903	231217	4.55616e+06	10004.4	1991	1989	1991	0	2	0	0	0	0	100	1.92027	0.0716179	64.9191	6.03573	7.61368	0.0012836	0.489409	50.6236	8.51683	83.4666	32.8354	4.18213	39.4378	72.9299	91.451	31.4707	0.622087	57.0692	0	0	0	3.0651	7.90181	0	20.1622	6.21668	4.56657	3.51472	24.9329	0.144	0.221539	5.67498	0	1.03695
330903	1992	330903	231217	4.55616e+06	10004.4	1992	1989	1991	0	2	0	0	0	0	100	1.88712	0.0670358	62.6444	8.99549	9.2988	0.0019254	0.488603	52.7049	7.8317	83.715	32.2371	4.11163	38.206	73.6381	90.0784	33.1069	0.600354	55.9808	0	0	0	3.46602	8.21554	0	19.7384	6.21739	5.15972	3.8353	25.3248	0.143	0.265847	6.2517	0	1.1763
330903	1993	330903	231217	4.55616e+06	10004.4	1993	1989	1991	0	2	0	0	0	0	100	1.85397	0.0624537	60.3697	11.9553	10.9839	0.0025672	0.487796	54.7862	7.14658	83.9634	31.6389	4.04112	36.9743	74.3463	88.7058	34.743	0.578621	54.8924	0	0	0	3.86693	8.52927	0	19.3147	6.21811	5.75288	4.15588	25.7167	0.141	0.310155	6.82841	0	1.31566
330903	1994	330903	231217	4.55616e+06	10004.4	1994	1989	1991	0	0	0	0	0	0	0	1.82082	0.0578716	58.0951	14.915	12.669	0.003209	0.48699	56.8676	6.46145	84.2119	31.0406	3.97061	35.7426	75.0545	87.3332	36.3792	0.556887	53.804	0	0	0	4.26785	8.84299	0	18.8909	6.21882	6.34603	4.47646	26.1085	0.14	0.354463	7.40513	0	1.45501
330903	1995	330903	231217	4.55616e+06	10004.4	1995	1989	1991	0	0	0	0	0	0	0	1.78767	0.0532895	55.8204	17.8748	14.3541	0.0038508	0.486183	58.9489	5.77632	84.4603	30.4424	3.90011	34.5109	75.7627	85.9606	38.0154	0.535154	52.7156	0	0	0	4.66876	9.15672	0	18.4671	6.21954	6.93918	4.79705	26.5004	0.139	0.398771	7.98185	0	1.59437
330903	1996	330903	231217	4.55616e+06	10004.4	1996	1999	2001	0	0	0	0	0	0	0	1.75452	0.0487074	53.5458	20.8345	16.0393	0.0044926	0.485377	61.0302	5.09119	84.7087	29.8442	3.8296	33.2792	76.4709	84.588	39.6516	0.513421	51.6272	0	0	0	5.06968	9.47045	0	18.0433	6.22025	7.53234	5.11763	26.8923	0.137	0.443079	8.55857	0	1.73372
330903	1997	330903	231217	4.55616e+06	10004.4	1997	1999	2001	0	0	0	0	0	0	0	1.72137	0.0441253	51.2711	23.7943	17.7244	0.0051344	0.48457	63.1115	4.40606	84.9571	29.2459	3.75909	32.0475	77.179	83.2153	41.2878	0.491688	50.5388	0	0	0	5.47059	9.78418	0	17.6195	6.22097	8.12549	5.43821	27.2841	0.136	0.487386	9.13528	0	1.87308
330903	1998	330903	231217	4.55616e+06	10004.4	1998	1999	2001	0	0	0	0	0	0	0	1.68822	0.0395432	48.9965	26.7541	19.4095	0.0057762	0.483764	65.1928	3.72093	85.2056	28.6477	3.68859	30.8158	77.8872	81.8427	42.924	0.469954	49.4504	0	0	0	5.87151	10.0979	0	17.1957	6.22168	8.71864	5.75879	27.676	0.134	0.531694	9.712	0	2.01244
330903	1999	330903	231217	4.55616e+06	10004.4	1999	1999	2001	0	0	0	0	0	0	0	1.65507	0.0349611	46.7218	29.7138	21.0946	0.006418	0.482957	67.2742	3.0358	85.454	28.0494	3.61808	29.5841	78.5954	80.4701	44.5602	0.448221	48.362	0	0	0	6.27242	10.4116	0	16.772	6.2224	9.3118	6.07938	28.0679	0.133	0.576002	10.2887	0	2.15179
330903	2000	330903	231217	4.55616e+06	10004.4	2000	1999	2001	0	0	0	0	0	0	0	1.62192	0.030379	44.4471	32.6736	22.7797	0.225103	0.5004	64.9848	3.90366	83.6629	30.3796	4.04296	30.7881	78.5954	80.4701	44.5628	0.448221	47.2736	0	0	0	6.67334	10.7254	0	16.3482	6.22311	9.90495	6.39996	28.4597	0.15	0.62031	10.8654	0	2.29115
330903	2001	330903	231217	4.55616e+06	10004.4	2001	1999	2001	0	0	0	0	0	0	0	1.62192	0.030379	44.4471	32.6736	22.7797	0.443789	0.517843	62.6954	4.77152	81.8718	32.7097	4.46784	31.9921	78.5954	80.4701	44.5653	0.448221	47.2736	0	0	0	6.675	10.7187	0	16.3515	6.22144	9.90495	6.40049	28.4623	0.15	0.516925	9.05453	0	1.90929
330903	2002	330903	231217	4.55616e+06	10004.4	2002	1999	2001	0	0	0	0	0	0	0	1.62192	0.030379	44.4471	32.6736	22.7797	0.662474	0.535286	60.406	5.63938	80.0806	35.0398	4.89272	33.1961	78.5954	80.4701	44.5678	0.448221	47.2736	0	0	0	6.67667	10.712	0	16.3548	6.21978	9.90495	6.40102	28.4649	0.15	0.41354	7.24362	0	1.52743
330903	2003	330903	231217	4.55616e+06	10004.4	2003	1999	2001	0	0	0	0	0	0	0	1.62192	0.030379	44.4471	32.6736	22.7797	0.88116	0.55273	58.1166	6.50723	78.2895	37.3699	5.3176	34.4001	78.5954	80.4701	44.5704	0.448221	47.2736	0	0	0	6.67834	10.7054	0	16.3582	6.21811	9.90495	6.40155	28.4675	0.15	0.310155	5.43272	0	1.14557
330903	2004	330903	231217	4.55616e+06	10004.4	2004	1999	2001	1	0	0	1	0	10.5	0	1.62192	0.030379	44.4471	32.6736	22.7797	1.09985	0.570173	55.8273	7.37509	76.4984	39.7	5.74248	35.6041	78.5954	80.4701	44.5729	0.448221	47.2736	0	0	0	6.68001	10.6987	0	16.3615	6.21644	9.90495	6.40208	28.4701	0.15	0.20677	3.62181	0	0.763715
330903	2005	330903	231217	4.55616e+06	10004.4	2005	1999	2001	1	1	0	0	0	0.1	10.5	1.62192	0.030379	44.4471	32.6736	22.7797	1.31853	0.587616	53.5379	8.24295	74.7073	42.0302	6.16736	36.8081	78.5954	80.4701	44.5755	0.448221	47.2736	0	0	0	6.68167	10.692	0	16.3648	6.21477	9.90495	6.40261	28.4727	0.15	0.103385	1.81091	0	0.381858
330903	2006	330903	231217	4.55616e+06	10004.4	2006	2009	2001	0	2	0	0	0	0	10.6	1.62192	0.030379	44.4471	32.6736	22.7797	1.53722	0.605059	51.2485	9.1108	72.9162	44.3603	6.59224	38.0121	78.5954	80.4701	44.578	0.448221	47.2736	0	0	0	6.68334	10.6853	0	16.3682	6.21311	9.90495	6.40314	28.4753	0.15	0	0	0	0
330903	2007	330903	231217	4.55616e+06	10004.4	2007	2009	2001	1	2	0	0	0	0.3	10.6	1.62192	0.030379	44.4471	32.6736	22.7797	1.7559	0.622502	48.9591	9.97866	71.1251	46.6904	7.01711	39.2161	78.5954	80.4701	44.5805	0.448221	47.2736	0	0	0	6.68334	10.6853	0	16.3682	6.21311	9.90495	6.40314	28.4753	0.15	0	0	0	0
330903	2008	330903	231217	4.55616e+06	10004.4	2008	2009	2001	0	3	0	0	0	0	10.9	1.62192	0.030379	44.4471	32.6736	22.7797	2.19327	0.657388	44.3803	11.7144	67.5428	51.3507	7.86687	41.624	78.5954	80.4701	44.5856	0.448221	47.2736	0	0	0	6.68334	10.6853	0	16.3682	6.21311	9.90495	6.40314	28.4753	0.15	0	0	0	0
330904	1979	330904	230529	4546186	10004.3	1979	1972	1981	0	0	0	0	0	0	0	2.42326	0.247507	67.2528	5.95089	6.88405	0.455	1.16615	48.9874	7.43769	54.2845	47.2548	19.9667	42.7893	49.4046	25.9271	25.8936	18.196	56.1637	0.120072	0	0	1.81109	7.59956	0	25.4853	8.0048	0.815489	2.50407	17.0014	0	0	9.7949	0	0.10005
330904	1980	330904	230529	4546186	10004.3	1980	1982	1981	0	0	0	0	0	0	0	2.27444	0.247507	67.2528	5.95089	6.88405	0.303	1.10313	53.1221	6.42849	55.6525	46.2953	19.1251	39.8889	49.4046	25.9271	25.8936	18.196	56.5025	0.122931	0	0	1.60811	6.86269	0	26.4945	7.47734	0.931988	2.1522	17.0779	0	0	8.88587	0	0.114343
330904	1981	330904	230529	4546186	10004.3	1981	1982	1981	0	0	0	0	0	0	0	2.21288	0.253287	65.8105	6.15307	6.95789	0.152	1.04012	57.2568	5.41928	57.0204	45.3357	18.2836	36.9884	49.4046	25.9271	25.8936	18.196	56.8412	0.12579	0	0	1.40513	6.12582	0	27.5036	6.94988	1.04849	1.80033	17.1543	0	0	7.97685	0	0.128636
330904	1982	330904	230529	4546186	10004.3	1982	1982	1981	0	0	0	0	0	0	0	2.15133	0.259066	64.3681	6.35526	7.03173	0	0.977102	61.3914	4.41007	58.3884	44.3762	17.4421	34.088	49.4046	25.9271	25.8936	18.196	57.18	0.128649	0	0	1.20215	5.38895	0	28.5128	6.42243	1.16498	1.44846	17.2308	0	0	7.06782	0	0.142929
330904	1983	330904	230529	4546186	10004.3	1983	1982	1981	0	0	0	0	0	0	0	2.08978	0.264846	62.9258	6.55744	7.10557	0	0.945945	60.0365	3.98453	59.5366	43.5774	16.0728	35.7044	51.9846	36.335	26.4452	15.6868	57.5188	0.131507	0	0	0.999171	4.65208	0	29.522	5.89497	1.28148	1.09659	17.3072	0	0	6.15879	0	0.157221
330904	1984	330904	230529	4546186	10004.3	1984	1982	1981	1	0	0	1	0	25	0	2.02822	0.270626	61.4834	6.75962	7.17941	0	0.914787	58.6816	3.55899	60.6848	42.7785	14.7035	37.3208	54.5646	46.7428	26.9968	13.1775	57.8576	0.134366	0	0	0.796192	3.91521	0	30.5312	5.36751	1.39798	0.744716	17.3837	0	0	5.24977	0	0.171514
330904	1985	330904	230529	4546186	10004.3	1985	1982	1981	0	1	0	0	0	0	25	1.96667	0.276406	60.0411	6.96181	7.25325	0	0.88363	57.3267	3.13345	61.833	41.9796	13.3342	38.9373	57.1447	57.1507	27.5484	10.6683	58.1963	0.137225	0	0	0.593213	3.17834	0	31.5404	4.84005	1.51448	0.392844	17.4602	0	0	4.34074	0	0.185807
[truncated: 12,053 more rows]
[truncated: 83 more columns]

## Sheet: labels of variables
	COD250	ID cells
[truncated: 130 more rows]
